# Supplementary material for: Nitrous oxide variability at sub-kilometre resolution in the Atlantic sector of the Southern Ocean
Source: PeerJ. 2018 Jul 6;6:e5100. doi: 10.7717/peerj.5100 (PMC6037155; doi:10.7717/peerj.5100)
Supplement: Data S1 — N2O concentration, saturation and sea-to-air flux data for JR260B and JR255A/GENTOO. [file peerj-06-5100-s001.xlsx]

## Sheet: JR260B
Time	Latitude	Longitude	c(N2O)/nmol L-1	s(N2O)/%	F(N2O)/µmol m-2 d-1	Sea surface salinity	Sea surface temperature/°C	Wind speed/m s-1
2011-12-29 20:00:25	-52.2746	-48.3347	15.4272	121.019	12.4858	33.9098	4.56	11.4152
2011-12-29 20:01:26	-52.275	-48.329	15.5097	121.312	12.6522	33.912	4.48	11.4098
2011-12-29 20:02:26	-52.2754	-48.3232	15.5446	121.579	12.8006	33.9124	4.48	11.4045
2011-12-29 20:03:26	-52.2758	-48.3173	15.589	121.816	12.9287	33.9112	4.45	11.3992
2011-12-29 20:04:26	-52.2761	-48.3114	15.6329	121.995	13.0278	33.913	4.41987	11.3939
2011-12-29 20:05:27	-52.2765	-48.3056	15.6008	122.155	13.1047	33.911	4.50803	11.3886
2011-12-29 20:06:27	-52.2769	-48.2997	15.6263	122.287	13.1683	33.9184	4.48459	11.3832
2011-12-29 20:07:28	-52.2773	-48.2938	15.6318	122.421	13.2368	33.9182	4.51	11.3778
2011-12-29 20:08:28	-52.2775	-48.2881	15.6516	122.485	13.2636	33.9171	4.48923	11.3724
2011-12-29 20:09:28	-52.2779	-48.2824	15.6254	122.315	13.1521	33.9166	4.49863	11.3671
2011-12-29 20:10:29	-52.2783	-48.2766	15.5777	121.921	12.9087	33.9148	4.49469	11.3618
2011-12-29 20:11:29	-52.2788	-48.2707	15.5179	121.479	12.6372	33.9152	4.50083	11.3564
2011-12-29 20:12:30	-52.2792	-48.2648	15.4833	121.088	12.3969	33.9151	4.47268	11.3511
2011-12-29 20:13:30	-52.2796	-48.2589	15.447	120.749	12.1897	33.9149	4.4656	11.3457
2011-12-29 20:14:30	-52.2799	-48.253	15.4263	120.49	12.0279	33.914	4.44413	11.3403
2011-12-29 20:15:31	-52.2802	-48.247	15.3788	120.303	11.9034	33.9136	4.48	11.335
2011-12-29 20:16:31	-52.2806	-48.241	15.3599	120.148	11.8032	33.9117	4.48102	11.3296
2011-12-29 20:17:32	-52.281	-48.2351	15.3493	120.008	11.7116	33.9114	4.46945	11.3243
2011-12-29 20:18:32	-52.2814	-48.229	15.3227	119.871	11.6183	33.9104	4.48	11.3189
2011-12-29 20:19:33	-52.2818	-48.223	15.3316	119.752	11.5417	33.9091	4.44	11.3135
2011-12-29 20:20:33	-52.2821	-48.217	15.3061	119.648	11.4691	33.9101	4.461	11.3082
2011-12-29 20:21:33	-52.2825	-48.211	15.3009	119.535	11.396	33.9106	4.45	11.3029
2011-12-29 20:22:34	-52.2828	-48.2051	15.2766	119.418	11.3165	33.9084	4.4643	11.2977
2011-12-29 20:23:34	-52.2831	-48.1993	15.283	119.307	11.2443	33.9072	4.43	11.2925
2011-12-29 20:24:35	-52.2834	-48.1935	15.2637	119.19	11.1668	33.9045	4.44	11.2872
2011-12-29 20:25:35	-52.2838	-48.1877	15.2559	119.07	11.0881	33.9016	4.42589	11.282
2011-12-29 20:26:35	-52.2841	-48.1819	15.2222	118.925	10.9948	33.9022	4.45786	11.2768
2011-12-29 20:27:36	-52.2845	-48.176	15.2113	118.719	10.8654	33.8999	4.427	11.2716
2011-12-29 20:28:36	-52.2848	-48.1701	15.1793	118.461	10.7054	33.8974	4.42185	11.2663
2011-12-29 20:29:37	-52.2852	-48.1643	15.1417	118.136	10.5101	33.9006	4.42	11.2611
2011-12-29 20:30:37	-52.2856	-48.1584	15.0914	117.822	10.3187	33.8982	4.44	11.2559
2011-12-29 20:31:37	-52.2859	-48.1525	15.0618	117.581	10.1667	33.8985	4.42656	11.2507
2011-12-29 20:32:38	-52.2863	-48.1466	15.0447	117.395	10.0533	33.8961	4.42232	11.2455
2011-12-29 20:33:38	-52.2866	-48.1407	15.0267	117.211	9.93817	33.8938	4.4105	11.2403
2011-12-29 20:34:38	-52.287	-48.1349	15.002	117.035	9.82839	33.8979	4.41611	11.235
2011-12-29 20:35:39	-52.2874	-48.1291	15	116.903	9.7451	33.8963	4.39	11.2298
2011-12-29 20:36:39	-52.2877	-48.1232	14.9856	116.781	9.66548	33.8951	4.38448	11.2246
2011-12-29 20:37:40	-52.2881	-48.1172	14.9798	116.626	9.56929	33.8951	4.36	11.2193
2011-12-29 20:38:40	-52.2885	-48.1113	14.9709	116.509	9.49584	33.8916	4.3543	11.2141
2011-12-29 20:39:40	-52.2889	-48.1054	14.9804	116.404	9.4268	33.8907	4.30783	11.2089
2011-12-29 20:40:41	-52.2893	-48.0994	14.9566	116.277	9.34464	33.8891	4.32	11.2036
2011-12-29 20:41:41	-52.2898	-48.0936	14.94	116.158	9.27067	33.889	4.32926	11.1984
2011-12-29 20:42:42	-52.2902	-48.0877	14.9116	115.999	9.1695	33.8885	4.33984	11.1932
2011-12-29 20:43:42	-52.2906	-48.0816	14.91	115.791	9.0453	33.8858	4.29911	11.188
2011-12-29 20:44:42	-52.291	-48.0757	14.8901	115.592	8.9226	33.8885	4.28343	11.1827
2011-12-29 20:45:43	-52.2914	-48.0698	14.8767	115.413	8.81392	33.8858	4.27254	11.177
2011-12-29 20:46:43	-52.2918	-48.0639	14.8577	115.306	8.74293	33.8854	4.28	11.1708
2011-12-29 20:47:44	-52.2922	-48.0581	14.8362	115.244	8.69748	33.8854	4.3041	11.1647
2011-12-29 20:48:44	-52.2926	-48.0523	14.8461	115.226	8.67852	33.8856	4.28	11.1586
2011-12-29 20:49:44	-52.293	-48.0466	14.8481	115.215	8.66219	33.8848	4.27	11.1525
2011-12-29 20:50:45	-52.2934	-48.0406	14.8469	115.186	8.6383	33.8843	4.27	11.1463
2011-12-29 20:51:45	-52.2938	-48.0347	14.8464	115.157	8.61296	33.8833	4.26246	11.1402
2011-12-29 20:52:46	-52.2942	-48.0287	14.8603	115.111	8.57994	33.8822	4.23	11.1341
2011-12-29 20:53:46	-52.2946	-48.0228	14.8698	115.06	8.54254	33.8823	4.19853	11.1279
2011-12-29 20:54:47	-52.2951	-48.0169	14.8835	115.006	8.50696	33.8792	4.16987	11.1218
2011-12-29 20:55:47	-52.2955	-48.011	14.9391	114.958	8.47491	33.8778	4.05746	11.1157
2011-12-29 20:56:47	-52.2959	-48.0051	14.9728	114.918	8.44624	33.8698	3.98821	11.1096
2011-12-29 20:57:48	-52.2963	-47.9992	15.0006	114.887	8.42497	33.8612	3.94	11.1035
2011-12-29 20:58:48	-52.2968	-47.9934	14.9729	114.772	8.34935	33.854	3.96	11.0974
2011-12-29 20:59:49	-52.2972	-47.9876	14.934	114.46	8.16559	33.8508	3.96	11.0913
2011-12-29 21:00:49	-52.2976	-47.9817	14.884	113.986	7.89084	33.8502	3.94	11.0852
2011-12-29 21:01:50	-52.298	-47.9757	14.8193	113.466	7.58976	33.8492	3.93372	11.079
2011-12-29 21:02:50	-52.2984	-47.9698	14.7601	113.06	7.35298	33.8434	3.94705	11.0729
2011-12-29 21:03:50	-52.2987	-47.9639	14.731	112.789	7.19419	33.8391	3.93801	11.0667
2011-12-29 21:04:51	-52.299	-47.9581	14.6944	112.55	7.04984	33.835	3.93883	11.0605
2011-12-29 21:05:51	-52.2993	-47.9523	14.6604	112.255	6.87914	33.8329	3.94	11.0543
2011-12-29 21:06:52	-52.2996	-47.9466	NaN	NaN	NaN	33.8331	3.93938	11.0487
2011-12-29 21:07:52	-52.3	-47.9408	14.5366	111.404	6.38705	33.829	3.95526	11.0433
2011-12-29 21:08:53	-52.3002	-47.9351	14.5076	110.974	6.14425	33.8303	3.91512	11.0379
2011-12-29 21:09:53	-52.3004	-47.9295	14.4429	110.568	5.90984	33.8241	3.93333	11.0325
2011-12-29 21:10:54	-52.3008	-47.9238	14.3962	110.216	5.70812	33.8221	3.93575	11.0271
2011-12-29 21:11:54	-52.3012	-47.918	14.3499	109.898	5.52508	33.8194	3.94498	11.0218
2011-12-29 21:12:54	-52.3015	-47.9122	14.3067	109.552	5.3271	33.8202	3.94	11.0164
2011-12-29 21:13:55	-52.3019	-47.9063	14.2476	109.204	5.12806	33.8183	3.96632	11.011
2011-12-29 21:14:55	-52.3022	-47.9004	14.1939	108.869	4.93483	33.8157	3.9776	11.0056
2011-12-29 21:15:56	-52.3026	-47.8946	14.1399	108.59	4.77617	33.8159	4.02	11.0003
2011-12-29 21:16:56	-52.3029	-47.8888	14.0993	108.339	4.63119	33.8095	4.03073	10.9949
2011-12-29 21:17:57	-52.3032	-47.883	14.0522	108.101	4.49427	33.8058	4.05992	10.9895
2011-12-29 21:18:57	-52.3036	-47.8772	14.0414	107.911	4.38455	33.8096	4.03	10.9842
2011-12-29 21:19:57	-52.304	-47.8714	14.0248	107.756	4.29461	33.8109	4.02	10.9789
2011-12-29 21:20:58	-52.3044	-47.8656	14.001	107.644	4.22959	33.8105	4.04464	10.9736
2011-12-29 21:21:58	-52.3048	-47.8599	13.9991	107.609	4.20622	33.8101	4.04	10.9684
2011-12-29 21:22:59	-52.3052	-47.854	14.0174	107.635	4.21756	33.8101	4.01	10.9632
2011-12-29 21:23:59	-52.3056	-47.8482	14.0085	107.685	4.24053	33.8128	4.04033	10.9579
2011-12-29 21:24:59	-52.3059	-47.8424	14.0308	107.703	4.24735	33.8112	4	10.9526
2011-12-29 21:26:00	-52.3063	-47.8367	14.0234	107.738	4.26161	33.8118	4.02	10.9473
2011-12-29 21:27:00	-52.3067	-47.831	14.0403	107.785	4.28369	33.811	4.00473	10.9406
2011-12-29 21:28:01	-52.3072	-47.8251	14.0568	107.838	4.3077	33.8111	3.98	10.9339
2011-12-29 21:29:01	-52.3076	-47.8192	14.0352	107.913	4.34267	33.8134	4.03912	10.9272
2011-12-29 21:30:01	-52.3079	-47.8134	14.0269	107.982	4.37594	33.8164	4.08	10.9204
2011-12-29 21:31:02	-52.3084	-47.8077	14.0274	108.055	4.40939	33.8114	4.08922	10.9137
2011-12-29 21:32:02	-52.3088	-47.8019	14.034	108.1	4.42892	33.812	4.08825	10.907
2011-12-29 21:33:03	-52.3091	-47.7961	14.0115	108.096	4.42067	33.813	4.13	10.9002
2011-12-29 21:34:03	-52.3096	-47.7904	14.0266	108.063	4.39815	33.8125	4.09356	10.8936
2011-12-29 21:35:04	-52.31	-47.7846	14.0097	108.022	4.37036	33.8112	4.11566	10.8868
2011-12-29 21:36:04	-52.3104	-47.7788	14.0017	107.983	4.34443	33.8153	4.12527	10.8801
2011-12-29 21:37:05	-52.3108	-47.773	13.9741	107.955	4.3235	33.8117	4.17	10.8734
2011-12-29 21:38:05	-52.3112	-47.7673	13.973	107.912	4.29512	33.8099	4.1631	10.8667
2011-12-29 21:39:05	-52.3115	-47.7616	13.9412	107.884	4.27408	33.8097	4.2178	10.86
2011-12-29 21:40:06	-52.3119	-47.7558	13.9487	107.833	4.24172	33.8113	4.18858	10.8532
2011-12-29 21:41:06	-52.3123	-47.7499	13.9209	107.789	4.2119	33.8095	4.22926	10.8464
2011-12-29 21:42:07	-52.3126	-47.7441	13.9143	107.765	4.1929	33.8109	4.23	10.8396
2011-12-29 21:43:07	-52.3131	-47.7382	13.8768	107.747	4.17715	33.8114	4.29689	10.8329
2011-12-29 21:44:08	-52.3134	-47.7325	13.8715	107.751	4.17464	33.809	4.31233	10.8262
2011-12-29 21:45:08	-52.3137	-47.7267	13.8519	107.761	4.17343	33.8078	4.34649	10.8193
2011-12-29 21:46:09	-52.314	-47.7212	13.83	107.816	4.19781	33.8066	4.40834	10.8126
2011-12-29 21:47:09	-52.3143	-47.7156	13.8004	107.891	4.23116	33.805	4.48	10.8058
2011-12-29 21:48:09	-52.3147	-47.71	13.7883	107.959	4.26205	33.8022	4.52128	10.7992
2011-12-29 21:49:10	-52.315	-47.7042	13.7889	108.013	4.28558	33.803	4.53355	10.7924
2011-12-29 21:50:10	-52.3154	-47.6984	13.7872	108.077	4.31403	33.8035	4.55	10.7856
2011-12-29 21:51:11	-52.3158	-47.6926	13.7918	108.2	4.37434	33.8008	4.57181	10.7789
2011-12-29 21:52:11	-52.3161	-47.6869	13.8067	108.34	4.44368	33.7978	4.58	10.7721
2011-12-29 21:53:12	-52.3165	-47.6811	13.827	108.511	4.53092	33.7957	4.58964	10.7659
2011-12-29 21:54:12	-52.3167	-47.6754	13.8543	108.671	4.60982	33.7946	4.56271	10.7603
2011-12-29 21:55:12	-52.3171	-47.6698	13.8619	108.793	4.67004	33.7934	4.58	10.7548
2011-12-29 21:56:13	-52.3175	-47.6641	13.8861	108.893	4.71951	33.7883	4.56	10.7492
2011-12-29 21:57:13	-52.3178	-47.6582	13.9132	108.959	4.75164	33.7896	4.53	10.7437
2011-12-29 21:58:14	-52.3182	-47.6525	13.9216	108.957	4.74597	33.7888	4.51118	10.7382
2011-12-29 21:59:14	-52.3186	-47.6467	13.9265	108.897	4.71061	33.7835	4.48929	10.7326
2011-12-29 22:00:15	-52.3189	-47.6409	13.9263	108.842	4.67794	33.7809	4.48	10.7271
2011-12-29 22:01:15	-52.3192	-47.635	13.9078	108.759	4.62776	33.7796	4.4869	10.7215
2011-12-29 22:02:15	-52.3196	-47.6291	13.9055	108.643	4.56336	33.778	4.4677	10.7159
2011-12-29 22:03:16	-52.32	-47.6233	13.8898	108.541	4.50434	33.776	4.46839	10.7104
2011-12-29 22:04:16	-52.3203	-47.6177	13.8709	108.424	4.4389	33.777	4.47871	10.705
2011-12-29 22:05:17	-52.3206	-47.612	13.8491	108.273	4.35455	33.7757	4.4798	10.6996
2011-12-29 22:06:17	-52.3209	-47.6061	13.8314	108.145	4.28255	33.7784	4.48	10.6941
2011-12-29 22:07:17	-52.3213	-47.6004	13.8338	108.035	4.22297	33.7767	4.46	10.6887
2011-12-29 22:08:18	-52.3217	-47.5947	13.821	107.924	4.15915	33.7767	4.45461	10.6821
2011-12-29 22:09:18	-52.3221	-47.5888	13.8056	107.823	4.10088	33.7782	4.45636	10.6754
2011-12-29 22:10:19	-52.3225	-47.5829	13.7962	107.77	4.06807	33.7793	4.46	10.6688
2011-12-29 22:11:19	-52.3229	-47.577	13.7841	107.77	4.06352	33.7782	4.48534	10.6621
2011-12-29 22:12:20	-52.3233	-47.5713	13.7979	107.77	4.05952	33.7791	4.46181	10.6555
2011-12-29 22:13:20	-52.3237	-47.5655	13.8146	107.763	4.05129	33.7802	4.42604	10.6489
2011-12-29 22:14:20	-52.3241	-47.5597	13.8196	107.782	4.05735	33.7823	4.42452	10.6422
2011-12-29 22:15:21	-52.3244	-47.554	13.841	107.829	4.07727	33.7811	4.39139	10.6356
2011-12-29 22:16:21	-52.3248	-47.5483	13.8362	107.916	4.1167	33.7783	4.42	10.6289
2011-12-29 22:17:22	-52.3252	-47.5426	13.847	107.989	4.15005	33.7791	4.42	10.6223
2011-12-29 22:18:22	-52.3256	-47.5368	13.8738	108.066	4.18517	33.779	4.38125	10.6157
2011-12-29 22:19:23	-52.326	-47.5311	13.8842	108.139	4.21915	33.7785	4.38797	10.6091
2011-12-29 22:20:23	-52.3263	-47.5255	13.8914	108.134	4.21157	33.7768	4.36899	10.6024
2011-12-29 22:21:23	-52.3267	-47.5198	13.8914	108.093	4.18611	33.7759	4.36388	10.5958
2011-12-29 22:22:24	-52.3271	-47.5141	13.8965	108.092	4.1809	33.7764	4.35469	10.5892
2011-12-29 22:23:24	-52.3275	-47.5083	13.8743	108.081	4.16927	33.7751	4.39	10.5826
2011-12-29 22:24:25	-52.3279	-47.5026	13.8913	108.013	4.12995	33.7734	4.34	10.5759
2011-12-29 22:25:25	-52.3283	-47.4969	13.8688	107.941	4.08775	33.7733	4.36744	10.5693
2011-12-29 22:26:26	-52.3287	-47.4911	13.8831	107.876	4.05027	33.7734	4.32356	10.5627
2011-12-29 22:27:26	-52.3291	-47.4853	13.8756	107.814	4.01515	33.7732	4.33087	10.556
2011-12-29 22:28:26	-52.3294	-47.4794	13.8645	107.732	3.96676	33.7736	4.32027	10.5494
2011-12-29 22:29:27	-52.3298	-47.4736	13.8545	107.681	3.93725	33.7709	4.34	10.5427
2011-12-29 22:30:27	-52.3301	-47.4679	13.8398	107.629	3.90477	33.7712	4.3482	10.536
2011-12-29 22:31:28	-52.3305	-47.4623	13.8474	107.571	3.87083	33.7704	4.31778	10.5294
2011-12-29 22:32:28	-52.3309	-47.4566	13.8552	107.55	3.85648	33.771	4.3	10.5228
2011-12-29 22:33:29	-52.3313	-47.4509	13.8456	107.516	3.83396	33.7717	4.30914	10.5162
2011-12-29 22:34:29	-52.3317	-47.4451	13.8401	107.489	3.81616	33.7704	4.31559	10.5095
2011-12-29 22:35:30	-52.3321	-47.4393	13.8253	107.494	3.81317	33.7705	4.34361	10.5029
2011-12-29 22:36:30	-52.3324	-47.4334	13.8182	107.501	3.81162	33.7716	4.35473	10.4962
2011-12-29 22:37:31	-52.3328	-47.4276	13.8209	107.492	3.80151	33.7719	4.34	10.4896
2011-12-29 22:38:31	-52.3332	-47.4219	13.809	107.483	3.79289	33.7714	4.36749	10.4829
2011-12-29 22:39:32	-52.3335	-47.4162	13.7967	107.468	3.78064	33.7699	4.38918	10.4763
2011-12-29 22:40:32	-52.3339	-47.4104	13.8233	107.456	3.77295	33.7714	4.34188	10.4707
2011-12-29 22:41:32	-52.3343	-47.4047	13.8126	107.479	3.77897	33.7708	4.36	10.465
2011-12-29 22:42:33	-52.3347	-47.3989	13.7959	107.479	3.77462	33.7685	4.39	10.4594
2011-12-29 22:43:33	-52.3351	-47.3932	13.8025	107.482	3.77282	33.7687	4.38277	10.4537
2011-12-29 22:44:34	-52.3355	-47.3876	13.8043	107.499	3.77739	33.769	4.38108	10.448
2011-12-29 22:45:34	-52.3359	-47.3821	13.8142	107.46	3.7546	33.7675	4.35534	10.4424
2011-12-29 22:46:35	-52.3362	-47.3765	13.8054	107.411	3.72617	33.7667	4.36	10.4367
2011-12-29 22:47:35	-52.3366	-47.3709	13.822	107.392	3.71418	33.7661	4.32703	10.4311
2011-12-29 22:48:35	-52.3369	-47.3654	13.8103	107.374	3.69993	33.7653	4.3378	10.4256
2011-12-29 22:49:36	-52.3373	-47.3599	13.7871	107.328	3.67242	33.7675	4.36848	10.4197
2011-12-29 22:50:36	-52.3377	-47.3543	13.7985	107.264	3.637	33.7673	4.33194	10.4136
2011-12-29 22:51:37	-52.3381	-47.3487	13.803	107.207	3.60522	33.7635	4.31004	10.4076
2011-12-29 22:52:37	-52.3385	-47.3431	13.7859	107.17	3.58274	33.7645	4.34	10.4015
2011-12-29 22:53:37	-52.3389	-47.3375	13.7772	107.141	3.56346	33.7653	4.34	10.3954
2011-12-29 22:54:38	-52.3393	-47.332	13.7799	107.099	3.53897	33.7644	4.32758	10.3893
2011-12-29 22:55:38	-52.3398	-47.3265	13.7797	107.064	3.51827	33.7631	4.32354	10.3833
2011-12-29 22:56:38	-52.3402	-47.3209	13.768	107.052	3.50756	33.7639	4.33613	10.3773
2011-12-29 22:57:39	-52.3406	-47.3152	13.7441	107.056	3.50519	33.7637	4.38476	10.3712
2011-12-29 22:58:39	-52.341	-47.3095	13.7667	107.06	3.50406	33.7655	4.34547	10.3652
2011-12-29 22:59:40	-52.3415	-47.3038	13.7707	107.093	3.51707	33.7692	4.34727	10.3591
2011-12-29 23:00:40	-52.3418	-47.2982	13.7813	107.151	3.5422	33.7686	4.34269	10.353
2011-12-29 23:01:41	-52.3423	-47.2924	13.7738	107.231	3.57633	33.767	4.36818	10.347
2011-12-29 23:02:41	-52.3427	-47.2868	13.7753	107.32	3.61572	33.7662	4.38747	10.3409
2011-12-29 23:03:42	-52.3431	-47.2812	13.7886	107.391	3.64808	33.7664	4.38997	10.3348
2011-12-29 23:04:42	-52.3434	-47.2755	13.8047	107.461	3.67835	33.7668	4.37193	10.3287
2011-12-29 23:05:42	-52.3438	-47.2699	13.8042	107.515	3.70044	33.7674	4.38183	10.3226
2011-12-29 23:06:43	-52.3442	-47.2642	13.8234	107.536	3.70796	33.7675	4.35716	10.3165
2011-12-29 23:07:43	-52.3446	-47.2586	13.8339	107.57	3.72044	33.7685	4.34371	10.3104
2011-12-29 23:08:44	-52.3449	-47.253	13.8178	107.592	3.72638	33.7676	4.38	10.3043
2011-12-29 23:09:44	-52.3453	-47.2475	13.8274	107.603	3.72747	33.7679	4.36	10.2982
2011-12-29 23:10:45	-52.3457	-47.2419	13.8304	107.622	3.73287	33.7668	4.36	10.2921
2011-12-29 23:11:45	-52.3461	-47.2363	13.8264	107.62	3.72872	33.7672	4.37541	10.286
2011-12-29 23:12:46	-52.3465	-47.2309	13.8126	107.6	3.71367	33.7661	4.39	10.28
2011-12-29 23:13:46	-52.3468	-47.2253	13.8298	107.599	3.70982	33.7669	4.36	10.2738
2011-12-29 23:14:46	-52.3472	-47.2197	13.8272	107.604	3.7071	33.7686	4.36	10.2677
2011-12-29 23:15:47	-52.3476	-47.2141	13.8433	107.623	3.71385	33.7664	4.34116	10.2617
2011-12-29 23:16:47	-52.3479	-47.2083	13.8178	107.637	3.71501	33.7668	4.39	10.2555
2011-12-29 23:17:48	-52.3484	-47.2026	13.8249	107.62	3.70295	33.7656	4.37	10.2495
2011-12-29 23:18:48	-52.3487	-47.1968	13.8334	107.624	3.70135	33.7689	4.36	10.2433
2011-12-29 23:19:49	-52.349	-47.1912	13.8327	107.612	3.69115	33.769	4.35402	10.2372
2011-12-29 23:20:49	-52.3493	-47.1856	13.8341	107.637	3.69927	33.7676	4.36	10.231
2011-12-29 23:21:49	-52.3496	-47.18	13.8335	107.663	3.70741	33.7683	4.36581	10.2249
2011-12-29 23:22:50	-52.3499	-47.1742	13.8084	107.648	3.69476	33.7691	4.40948	10.2187
2011-12-29 23:23:50	-52.3502	-47.1686	13.8189	107.648	3.69157	33.7709	4.39222	10.2126
2011-12-29 23:24:51	-52.3505	-47.163	13.7864	107.648	3.6856	33.7715	4.45146	10.2064
2011-12-29 23:25:51	-52.3508	-47.1574	13.8023	107.634	3.67465	33.7723	4.41057	10.2004
2011-12-29 23:26:52	-52.3511	-47.1519	13.7731	107.662	3.6836	33.7749	4.48	10.1944
2011-12-29 23:27:52	-52.3514	-47.1464	13.7915	107.688	3.69272	33.7763	4.45	10.1885
2011-12-29 23:28:52	-52.3518	-47.1408	13.7807	107.754	3.72015	33.7766	4.4881	10.1829
2011-12-29 23:29:53	-52.3521	-47.1352	13.7873	107.837	3.7562	33.7773	4.49726	10.1773
2011-12-29 23:30:53	-52.3524	-47.1295	13.7957	107.928	3.79556	33.7793	4.50306	10.1717
2011-12-29 23:31:54	-52.3527	-47.124	13.8168	108.002	3.82773	33.779	4.48	10.1665
2011-12-29 23:32:54	-52.353	-47.1184	13.8301	108.071	3.85753	33.7792	4.47028	10.1621
2011-12-29 23:33:54	-52.3534	-47.1129	13.8438	108.169	3.90085	33.7797	4.46586	10.1578
2011-12-29 23:34:55	-52.3537	-47.1074	13.8368	108.254	3.9382	33.7794	4.50366	10.1534
2011-12-29 23:35:55	-52.354	-47.1019	13.8426	108.344	3.97838	33.7779	4.51764	10.149
2011-12-29 23:36:56	-52.3544	-47.0965	13.8886	108.412	4.00881	33.78	4.44563	10.1446
2011-12-29 23:37:56	-52.3547	-47.091	13.8817	108.439	4.01738	33.7759	4.46046	10.1403
2011-12-29 23:38:57	-52.355	-47.0856	13.8579	108.47	4.02702	33.7776	4.51	10.1359
2011-12-29 23:39:57	-52.3554	-47.0801	13.8681	108.479	4.02943	33.7781	4.49868	10.1315
2011-12-29 23:40:58	-52.3557	-47.0746	13.8632	108.491	4.03169	33.7765	4.51	10.1271
2011-12-29 23:41:58	-52.356	-47.0692	13.8535	108.469	4.01757	33.7791	4.52404	10.1228
2011-12-29 23:42:58	-52.3564	-47.0637	13.8604	108.435	3.99807	33.7781	4.49744	10.1184
2011-12-29 23:43:59	-52.3567	-47.0581	13.8755	108.435	3.99565	33.777	4.46928	10.1141
2011-12-29 23:44:59	-52.357	-47.0525	13.8728	108.443	3.99643	33.7771	4.48	10.1097
2011-12-29 23:46:00	-52.3574	-47.0469	13.8659	108.444	3.9939	33.7754	4.49639	10.1054
2011-12-29 23:47:00	-52.3578	-47.0415	13.8661	108.447	3.99124	33.7747	4.49271	10.101
2011-12-29 23:48:01	-52.3581	-47.0359	13.87	108.433	3.98147	33.7741	4.48	10.0966
2011-12-29 23:49:01	-52.3585	-47.0305	13.8611	108.378	3.95182	33.773	4.48	10.0923
2011-12-29 23:50:01	-52.3589	-47.025	13.8686	108.323	3.92447	33.773	4.46	10.0879
2011-12-29 23:51:02	-52.3593	-47.0194	13.8643	108.271	3.8964	33.7712	4.45176	10.0836
2011-12-29 23:52:02	-52.3596	-47.0139	13.8529	108.221	3.87008	33.7708	4.46828	10.0792
2011-12-29 23:53:03	-52.36	-47.0084	13.8342	108.137	3.82645	33.7693	4.47731	10.0749
2011-12-29 23:54:03	-52.3604	-47.0029	13.8295	108.033	3.77527	33.7676	4.46374	10.0705
2011-12-29 23:55:04	-52.3608	-46.9974	13.8094	107.943	3.72954	33.7681	4.48	10.0662
2011-12-29 23:56:04	-52.3611	-46.9918	13.7993	107.841	3.67899	33.7678	4.47444	10.0618
2011-12-29 23:57:05	-52.3615	-46.9863	13.7924	107.754	3.63534	33.7666	4.46636	10.0575
2011-12-29 23:58:05	-52.3618	-46.9808	13.7801	107.683	3.59891	33.7666	4.47266	10.0531
2011-12-29 23:59:06	-52.3622	-46.9755	13.7721	107.608	3.56098	33.766	4.4681	10.0487
2011-12-30 00:00:06	-52.3625	-46.9701	13.7691	107.537	3.52424	33.7686	4.45099	10.0445
2011-12-30 00:01:06	-52.3629	-46.9646	13.7577	107.496	3.50462	33.767	4.46989	10.0424
2011-12-30 00:02:07	-52.3632	-46.9591	13.7623	107.468	3.48971	33.766	4.45	10.0402
2011-12-30 00:03:07	-52.3636	-46.9537	13.7409	107.424	3.46698	33.7676	4.48	10.038
2011-12-30 00:04:08	-52.364	-46.9482	13.761	107.383	3.44755	33.7688	4.43303	10.0358
2011-12-30 00:05:08	-52.3644	-46.9428	13.7384	107.376	3.44307	33.7694	4.48	10.0336
2011-12-30 00:06:09	-52.3648	-46.9374	13.7638	107.376	3.44184	33.7704	4.42603	10.0314
2011-12-30 00:07:09	-52.3652	-46.9318	13.7647	107.403	3.4526	33.7707	4.43024	10.0292
2011-12-30 00:08:09	-52.3656	-46.9264	13.7867	107.44	3.46935	33.7734	4.39846	10.0271
2011-12-30 00:09:10	-52.3659	-46.9208	13.7868	107.486	3.48937	33.774	4.41	10.0249
2011-12-30 00:10:10	-52.3663	-46.9152	13.8094	107.561	3.52385	33.7752	4.39	10.0227
2011-12-30 00:11:11	-52.3668	-46.9096	13.8237	107.653	3.56502	33.7762	4.38302	10.0206
2011-12-30 00:12:11	-52.3672	-46.9041	13.8307	107.737	3.60241	33.7772	4.39	10.0184
2011-12-30 00:13:12	-52.3676	-46.8985	13.8501	107.829	3.64364	33.7795	4.37	10.0163
2011-12-30 00:14:12	-52.3679	-46.893	13.8672	107.919	3.68426	33.7787	4.36	10.0141
2011-12-30 00:15:13	-52.3683	-46.8874	13.8765	108.038	3.73859	33.7831	4.37224	10.0128
2011-12-30 00:16:13	-52.3687	-46.8819	13.8965	108.178	3.8032	33.7818	4.37	10.0116
2011-12-30 00:17:14	-52.369	-46.8764	13.9043	108.35	3.88096	33.7811	4.39417	10.0102
2011-12-30 00:18:14	-52.3694	-46.8709	13.9311	108.557	3.97684	33.7807	4.39496	10.0095
2011-12-30 00:19:14	-52.3698	-46.8655	13.9168	108.728	4.05413	33.7855	4.46	10.0091
2011-12-30 00:20:15	-52.3701	-46.86	13.9397	108.831	4.1023	33.7821	4.4432	10.0087
2011-12-30 00:21:15	-52.3706	-46.8544	13.9375	108.895	4.13085	33.7834	4.4577	10.0083
2011-12-30 00:22:16	-52.3709	-46.8489	13.9474	108.958	4.16112	33.7847	4.46316	10.0079
2011-12-30 00:23:16	-52.3713	-46.8433	13.9446	109.04	4.19729	33.7847	4.48	10.0076
2011-12-30 00:24:17	-52.3716	-46.8377	13.9621	109.096	4.22335	33.7864	4.45983	10.0072
2011-12-30 00:25:17	-52.372	-46.8323	13.9585	109.144	4.24513	33.7876	4.48	10.0068
2011-12-30 00:26:17	-52.3724	-46.8267	13.9976	109.194	4.26925	33.7876	4.41802	10.0064
2011-12-30 00:27:18	-52.3728	-46.8211	14.0275	109.271	4.30564	33.7853	4.38	10.0061
2011-12-30 00:28:18	-52.373	-46.8156	14.0677	109.39	4.36259	33.7862	4.3409	10.0057
2011-12-30 00:29:19	-52.3734	-46.8101	14.1244	109.518	4.42324	33.7876	4.26461	10.0053
2011-12-30 00:30:19	-52.3737	-46.8046	14.1559	109.592	4.45857	33.786	4.22551	10.0049
2011-12-30 00:31:20	-52.3741	-46.7991	14.1536	109.612	4.46715	33.7902	4.23266	10.0045
2011-12-30 00:32:20	-52.3744	-46.7936	14.2054	109.616	4.4703	33.793	4.13574	10.0041
2011-12-30 00:33:21	-52.3748	-46.7879	14.2202	109.569	4.44921	33.7961	4.09581	10.0038
2011-12-30 00:34:21	-52.3752	-46.7823	14.2285	109.489	4.41242	33.8061	4.06236	10.0034
2011-12-30 00:35:21	-52.3755	-46.7766	14.2667	109.399	4.37265	33.8036	3.97025	10.0031
2011-12-30 00:36:22	-52.3759	-46.7709	14.2904	109.299	4.32707	33.8064	3.9	10.0029
2011-12-30 00:37:22	-52.3762	-46.7651	14.338	109.209	4.28872	33.8056	3.8	10.0026
2011-12-30 00:38:23	-52.3766	-46.7595	14.3587	109.148	4.26026	33.814	3.74228	10.0023
2011-12-30 00:39:23	-52.3769	-46.7538	14.322	109.041	4.20946	33.8197	3.78318	10.0019
2011-12-30 00:40:24	-52.3773	-46.7482	14.2774	108.879	4.13179	33.8596	3.82	10.0016
2011-12-30 00:41:24	-52.3776	-46.7426	14.2244	108.712	4.05216	33.8798	3.87506	10.0012
2011-12-30 00:42:24	-52.378	-46.737	14.1853	108.544	3.97318	33.8881	3.9042	10.001
2011-12-30 00:43:25	-52.3783	-46.7312	14.2083	108.441	3.92602	33.8937	3.83403	10.0007
2011-12-30 00:44:25	-52.3787	-46.7256	14.2257	108.475	3.94266	33.8935	3.81488	10.0003
2011-12-30 00:45:26	-52.379	-46.7201	14.25	108.603	4.00183	33.8913	3.79673	9.99997
2011-12-30 00:46:26	-52.3794	-46.7145	14.2602	108.691	4.04246	33.8888	3.8	9.99963
2011-12-30 00:47:27	-52.3797	-46.7089	14.2525	108.721	4.0552	33.8877	3.82	9.99926
2011-12-30 00:48:27	-52.3801	-46.7034	14.2193	108.725	4.05567	33.8863	3.88176	9.99886
2011-12-30 00:49:27	-52.3804	-46.6978	14.193	108.67	4.02899	33.8897	3.91631	9.99849
2011-12-30 00:50:28	-52.3807	-46.6922	14.1929	108.588	3.99027	33.8942	3.89256	9.99814
2011-12-30 00:51:28	-52.381	-46.6866	14.168	108.553	3.97392	33.8992	3.93658	9.99782
2011-12-30 00:52:29	-52.3814	-46.681	14.186	108.58	3.98657	33.9009	3.90844	9.99748
2011-12-30 00:53:29	-52.3817	-46.6753	14.2132	108.709	4.04674	33.9021	3.89	9.99717
2011-12-30 00:54:29	-52.3821	-46.6697	14.2381	108.893	4.13223	33.9022	3.89	9.99686
2011-12-30 00:55:30	-52.3825	-46.6639	14.2827	109.104	4.23101	33.9024	3.86	9.99661
2011-12-30 00:56:30	-52.3828	-46.6581	14.3328	109.329	4.33582	33.9015	3.82	9.99635
2011-12-30 00:57:31	-52.3832	-46.6523	14.3533	109.505	4.41592	33.8999	3.82	9.99509
2011-12-30 00:58:31	-52.3836	-46.6466	14.394	109.656	4.48692	33.8991	3.79082	9.99341
2011-12-30 00:59:32	-52.384	-46.6409	14.4078	109.767	4.53667	33.9002	3.79006	9.99171
2011-12-30 01:00:32	-52.3843	-46.6353	14.4193	109.814	4.55703	33.8999	3.78	9.99
2011-12-30 01:01:32	-52.3847	-46.6296	14.4329	109.808	4.55281	33.8976	3.75	9.98828
2011-12-30 01:02:33	-52.385	-46.6239	14.4494	109.749	4.52586	33.8961	3.71237	9.98616
2011-12-30 01:03:33	-52.3853	-46.6182	14.4685	109.666	4.48515	33.8979	3.65673	9.98229
2011-12-30 01:04:34	-52.3857	-46.6125	14.4906	109.55	4.43098	33.8886	3.59	9.97981
2011-12-30 01:05:34	-52.386	-46.6067	14.4578	109.407	4.36397	33.8829	3.61498	9.97995
2011-12-30 01:06:34	-52.3863	-46.6009	14.4593	109.249	4.29261	33.8801	3.58	9.98009
2011-12-30 01:07:35	-52.3866	-46.595	14.4566	109.036	4.19427	33.8761	3.53	9.98026
2011-12-30 01:08:35	-52.3868	-46.5892	14.4477	108.753	4.06429	33.8717	3.47751	9.98042
2011-12-30 01:09:36	-52.3872	-46.5835	14.406	108.467	3.93208	33.8612	3.48828	9.98053
2011-12-30 01:10:36	-52.3875	-46.5777	14.4028	108.227	3.82212	33.8561	3.44086	9.98064
2011-12-30 01:11:36	-52.3878	-46.5719	14.3994	108.041	3.73632	33.8495	3.4	9.98079
2011-12-30 01:12:37	-52.3883	-46.5661	14.3997	107.891	3.66722	33.8482	3.36	9.98087
2011-12-30 01:13:37	-52.3887	-46.5604	14.3836	107.737	3.59663	33.8424	3.36	9.98096
2011-12-30 01:14:38	-52.3891	-46.5547	14.3774	107.546	3.50851	33.836	3.3247	9.981
2011-12-30 01:15:38	-52.3895	-46.549	14.3564	107.369	3.42644	33.8319	3.32	9.98099
2011-12-30 01:16:38	-52.39	-46.5434	14.3486	107.222	3.3578	33.8266	3.29394	9.98102
2011-12-30 01:17:39	-52.3903	-46.5377	14.3471	107.095	3.30012	33.8231	3.27045	9.98103
2011-12-30 01:18:39	-52.3907	-46.5323	14.3439	106.962	3.23868	33.8198	3.2445	9.98095
2011-12-30 01:19:40	-52.3911	-46.5266	14.3303	106.842	3.18271	33.8151	3.24	9.98095
2011-12-30 01:20:40	-52.3916	-46.5209	14.3176	106.727	3.12938	33.8168	3.23394	9.98101
2011-12-30 01:21:40	-52.3919	-46.5152	14.3129	106.601	3.07132	33.8128	3.21224	9.9811
2011-12-30 01:22:41	-52.3924	-46.5094	14.2969	106.483	3.01683	33.8118	3.21663	9.98121
2011-12-30 01:23:41	-52.3928	-46.5036	14.302	106.372	2.96586	33.8074	3.18	9.98132
2011-12-30 01:24:41	-52.3932	-46.4978	14.302	106.277	2.92223	33.8073	3.16008	9.98144
2011-12-30 01:25:42	-52.3936	-46.492	14.2911	106.181	2.8771	33.805	3.14933	9.98154
2011-12-30 01:26:42	-52.394	-46.4862	14.2908	106.081	2.83141	33.8011	3.13	9.98164
2011-12-30 01:27:43	-52.3945	-46.4804	14.2788	105.963	2.77656	33.7957	3.12221	9.98176
2011-12-30 01:28:43	-52.3949	-46.4746	14.264	105.888	2.7414	33.7931	3.13	9.98185
2011-12-30 01:29:43	-52.3953	-46.4688	14.2408	105.856	2.72575	33.7903	3.16225	9.98196
2011-12-30 01:30:44	-52.3957	-46.4632	14.2395	105.806	2.70308	33.7905	3.15484	9.98197
2011-12-30 01:31:44	-52.3961	-46.4575	14.2241	105.809	2.70417	33.7886	3.18311	9.98201
2011-12-30 01:32:45	-52.3965	-46.4517	14.2252	105.807	2.70314	33.7871	3.18	9.98211
2011-12-30 01:33:45	-52.3969	-46.446	14.2362	105.771	2.68677	33.7864	3.15263	9.98218
2011-12-30 01:34:46	-52.3973	-46.4404	14.2228	105.775	2.68836	33.7855	3.18	9.98219
2011-12-30 01:35:46	-52.3978	-46.4346	14.2175	105.746	2.67453	33.7854	3.17884	9.98226
2011-12-30 01:36:46	-52.3982	-46.4287	14.2029	105.713	2.65917	33.7816	3.19899	9.98242
2011-12-30 01:37:47	-52.3986	-46.4229	14.2108	105.709	2.65846	33.7831	3.19	9.98253
2011-12-30 01:38:47	-52.3991	-46.4172	14.1815	105.699	2.65212	33.7841	3.24	9.98162
2011-12-30 01:39:47	-52.3995	-46.4113	14.1429	105.698	2.64899	33.7835	3.3017	9.9792
2011-12-30 01:40:48	-52.4	-46.4055	14.1367	105.696	2.64734	33.7839	3.32	9.97677
2011-12-30 01:41:48	-52.4005	-46.3997	14.126	105.718	2.65526	33.7854	3.34	9.97434
2011-12-30 01:42:48	-52.401	-46.3939	14.1366	105.794	2.68938	33.7881	3.34	9.97191
2011-12-30 01:43:49	-52.4014	-46.3882	14.1359	105.938	2.75442	33.7901	3.37475	9.96947
2011-12-30 01:44:49	-52.4019	-46.3823	14.1311	105.991	2.77698	33.7919	3.39	9.96705
2011-12-30 01:45:50	-52.4024	-46.3765	14.1216	106.04	2.7985	33.7897	3.42625	9.96463
2011-12-30 01:46:50	-52.4029	-46.3707	14.1453	106.198	2.86933	33.791	3.42	9.96082
2011-12-30 01:47:50	-52.4033	-46.365	14.1669	106.346	2.936	33.793	3.42	9.95652
2011-12-30 01:48:51	-52.4037	-46.3593	14.1745	106.488	2.9982	33.7931	3.43126	9.95223
2011-12-30 01:49:51	-52.4041	-46.3536	14.1923	106.62	3.05754	33.7906	3.43924	9.94794
2011-12-30 01:50:52	-52.4045	-46.3477	14.2168	106.756	3.11812	33.7883	3.42965	9.94363
2011-12-30 01:51:52	-52.4049	-46.3418	14.2314	106.888	3.17739	33.7924	3.43125	9.9419
2011-12-30 01:52:52	-52.4054	-46.3359	14.2444	107	3.22944	33.7917	3.43804	9.94204
2011-12-30 01:53:53	-52.4058	-46.3299	14.256	107.094	3.27309	33.7929	3.44	9.94217
2011-12-30 01:54:53	-52.4062	-46.324	14.2524	107.148	3.29776	33.7916	3.46	9.94221
2011-12-30 01:55:54	-52.4067	-46.3182	14.2802	107.2	3.32226	33.7899	3.42	9.94221
2011-12-30 01:56:54	-52.4071	-46.3124	14.2781	107.274	3.35577	33.7891	3.44	9.94224
2011-12-30 01:57:55	-52.4075	-46.3066	14.2947	107.367	3.39919	33.7885	3.43625	9.94225
2011-12-30 01:58:55	-52.4079	-46.3008	14.3118	107.458	3.44127	33.7891	3.42719	9.94231
2011-12-30 01:59:55	-52.4083	-46.2949	14.314	107.519	3.46945	33.7873	3.43791	9.94234
2011-12-30 02:00:56	-52.4087	-46.2891	14.3164	107.553	3.48477	33.7843	3.44121	9.9424
2011-12-30 02:01:56	-52.4091	-46.2832	14.3164	107.573	3.49339	33.789	3.4396	9.94248
2011-12-30 02:02:57	-52.4095	-46.2773	14.3087	107.573	3.49385	33.7885	3.46049	9.94259
2011-12-30 02:03:57	-52.4099	-46.2714	14.3263	107.573	3.49366	33.7861	3.42116	9.9427
2011-12-30 02:04:57	-52.4104	-46.2654	14.3074	107.626	3.51818	33.7866	3.47618	9.94288
2011-12-30 02:05:58	-52.4108	-46.2595	14.3071	107.664	3.53544	33.7881	3.48283	9.94295
2011-12-30 02:06:58	-52.4111	-46.2536	14.3203	107.7	3.55212	33.7899	3.4664	9.94307
2011-12-30 02:07:59	-52.4116	-46.2477	14.317	107.742	3.57157	33.7909	3.4846	9.94315
2011-12-30 02:08:59	-52.412	-46.2417	14.3109	107.774	3.58573	33.7929	3.50199	9.94329
2011-12-30 02:10:00	-52.4124	-46.2358	14.3115	107.807	3.60098	33.7922	3.50932	9.94338
2011-12-30 02:11:00	-52.4128	-46.2299	14.3111	107.866	3.62765	33.7934	3.52	9.94343
2011-12-30 02:12:01	-52.4132	-46.2243	14.3311	107.959	3.67123	33.7921	3.51	9.94336
2011-12-30 02:13:01	-52.4135	-46.2188	14.3526	108.067	3.72157	33.7922	3.5007	9.94318
2011-12-30 02:14:02	-52.4139	-46.2132	14.3656	108.15	3.75876	33.7935	3.49	9.94306
2011-12-30 02:15:02	-52.4143	-46.2075	14.3829	108.249	3.80482	33.7913	3.48226	9.94302
2011-12-30 02:16:03	-52.4147	-46.2019	14.4092	108.35	3.85267	33.7935	3.46804	9.94295
2011-12-30 02:17:03	-52.4152	-46.1962	14.414	108.408	3.87915	33.7911	3.47293	9.94287
2011-12-30 02:18:03	-52.4155	-46.1905	14.4234	108.448	3.89737	33.7902	3.46	9.94284
2011-12-30 02:19:04	-52.416	-46.1848	14.434	108.488	3.91575	33.788	3.45	9.9428
2011-12-30 02:20:04	-52.4164	-46.1789	14.4507	108.523	3.93226	33.7858	3.43139	9.94186
2011-12-30 02:21:05	-52.4168	-46.1732	14.4517	108.546	3.94014	33.7859	3.43351	9.9388
2011-12-30 02:22:05	-52.4173	-46.1675	14.4366	108.553	3.94055	33.7846	3.46261	9.93576
2011-12-30 02:23:06	-52.4177	-46.1616	14.415	108.476	3.90186	33.7816	3.48	9.93274
2011-12-30 02:24:06	-52.4181	-46.1559	14.4015	108.381	3.85571	33.784	3.48	9.9297
2011-12-30 02:25:06	-52.4185	-46.15	14.4124	108.29	3.81296	33.7843	3.44017	9.92668
2011-12-30 02:26:07	-52.419	-46.1443	14.3801	108.19	3.76475	33.786	3.48	9.92364
2011-12-30 02:27:07	-52.4194	-46.1385	14.3357	108.122	3.7293	33.7865	3.53843	9.9206
2011-12-30 02:28:08	-52.4197	-46.1328	14.3483	108.071	3.70487	33.7878	3.50764	9.91756
2011-12-30 02:29:08	-52.4202	-46.1271	14.3491	108.063	3.69884	33.7899	3.5	9.9145
2011-12-30 02:30:09	-52.4206	-46.1214	14.3738	108.105	3.71645	33.7876	3.47	9.91055
2011-12-30 02:31:09	-52.421	-46.1158	14.4037	108.18	3.74844	33.7853	3.43488	9.90605
2011-12-30 02:32:09	-52.4214	-46.1101	14.4323	108.272	3.788	33.7818	3.40418	9.90155
2011-12-30 02:33:10	-52.4219	-46.1044	14.4428	108.363	3.82655	33.7792	3.41	9.89705
2011-12-30 02:34:10	-52.4223	-46.0988	14.456	108.417	3.8474	33.7823	3.39243	9.89255
2011-12-30 02:35:11	-52.4227	-46.0931	14.4523	108.406	3.83984	33.7823	3.4	9.88806
2011-12-30 02:36:11	-52.4231	-46.0875	14.4883	108.316	3.79807	33.7848	3.32	9.88357
2011-12-30 02:37:12	-52.4235	-46.082	14.4875	108.145	3.71735	33.7872	3.2798	9.87906
2011-12-30 02:38:12	-52.4237	-46.0763	14.4622	107.938	3.61948	33.7863	3.27	9.8746
2011-12-30 02:39:12	-52.4239	-46.0707	14.4433	107.763	3.53907	33.7863	3.26	9.87413
2011-12-30 02:40:13	-52.4242	-46.065	14.4337	107.649	3.48702	33.7812	3.25	9.87367
2011-12-30 02:41:13	-52.4244	-46.0593	14.3605	107.565	3.4466	33.7803	3.36192	9.87328
2011-12-30 02:42:14	-52.4246	-46.0537	14.2906	107.487	3.40864	33.7851	3.46966	9.87279
2011-12-30 02:43:14	-52.4248	-46.0481	14.2457	107.41	3.37186	33.792	3.53164	9.87234
2011-12-30 02:44:15	-52.425	-46.0424	14.2096	107.277	3.31027	33.7975	3.5634	9.87193
2011-12-30 02:45:15	-52.4252	-46.0366	14.1655	107.157	3.25455	33.8023	3.61508	9.87158
2011-12-30 02:46:16	-52.4254	-46.0307	14.1661	107.18	3.26455	33.8003	3.61832	9.87127
2011-12-30 02:47:16	-52.4256	-46.0251	14.2021	107.457	3.39013	33.8045	3.62072	9.87087
2011-12-30 02:48:17	-52.4258	-46.0195	14.2736	107.944	3.61171	33.8073	3.60981	9.87038
2011-12-30 02:49:17	-52.426	-46.0139	14.375	108.542	3.88459	33.8047	3.57	9.8699
2011-12-30 02:50:17	-52.4262	-46.0084	14.464	109.181	4.1743	33.7998	3.55814	9.86942
2011-12-30 02:51:18	-52.4264	-46.0029	14.5665	109.791	4.4526	33.797	3.52199	9.8689
2011-12-30 02:52:18	-52.4266	-45.9974	14.6636	110.318	4.69394	33.7865	3.48	9.86832
2011-12-30 02:53:19	-52.4268	-45.9918	14.7346	110.686	4.86086	33.7998	3.43565	9.8678
2011-12-30 02:54:19	-52.427	-45.9862	14.7788	110.875	4.94806	33.7913	3.40529	9.86736
2011-12-30 02:55:20	-52.4273	-45.9807	14.8019	110.873	4.94804	33.7895	3.36617	9.86676
2011-12-30 02:56:20	-52.4275	-45.9752	14.7955	110.694	4.86746	33.7855	3.34	9.86618
2011-12-30 02:57:20	-52.4278	-45.9698	14.7698	110.384	4.72614	33.7825	3.31	9.86552
2011-12-30 02:58:21	-52.4282	-45.9644	14.742	110.005	4.55385	33.7798	3.26853	9.86475
2011-12-30 02:59:21	-52.4285	-45.9588	14.7032	109.602	4.37061	33.7765	3.24	9.86413
2011-12-30 03:00:22	-52.4289	-45.9532	14.6484	109.201	4.18844	33.7756	3.24977	9.86355
2011-12-30 03:01:22	-52.4292	-45.9476	14.5956	108.827	4.01696	33.7765	3.25	9.86292
2011-12-30 03:02:23	-52.4296	-45.942	14.5157	108.454	3.84356	33.7749	3.3	9.86006
2011-12-30 03:03:23	-52.4299	-45.9364	14.4058	108.085	3.67143	33.7759	3.41	9.85681
2011-12-30 03:04:23	-52.4303	-45.9308	14.3024	107.747	3.51348	33.7795	3.51377	9.85352
2011-12-30 03:05:24	-52.4307	-45.9252	14.1899	107.39	3.3467	33.789	3.62892	9.85026
2011-12-30 03:06:24	-52.431	-45.9196	14.0976	107.079	3.20202	33.8007	3.72	9.84702
2011-12-30 03:07:25	-52.4314	-45.9142	14.0365	106.867	3.10314	33.8073	3.78	9.84372
2011-12-30 03:08:25	-52.4316	-45.9088	13.9457	106.762	3.05105	33.8109	3.92114	9.84047
2011-12-30 03:09:25	-52.432	-45.9031	13.8892	106.8	3.06409	33.8049	4.03589	9.83721
2011-12-30 03:10:26	-52.4324	-45.8975	13.8955	107.002	3.15314	33.8	4.07878	9.83394
2011-12-30 03:11:26	-52.4328	-45.8919	13.9204	107.314	3.29144	33.7941	4.10975	9.83069
2011-12-30 03:12:27	-52.4331	-45.8862	13.9385	107.62	3.4252	33.7959	4.14045	9.82744
2011-12-30 03:13:27	-52.4335	-45.8806	13.9761	107.935	3.56539	33.7984	4.15399	9.82421
2011-12-30 03:14:28	-52.4338	-45.8749	13.9951	108.199	3.68063	33.7985	4.18	9.82096
2011-12-30 03:15:28	-52.4341	-45.8692	13.9527	108.323	3.73058	33.7985	4.28717	9.81617
2011-12-30 03:16:28	-52.4344	-45.8635	13.9346	108.325	3.72726	33.8015	4.32285	9.81141
2011-12-30 03:17:29	-52.4348	-45.8579	13.9055	108.274	3.69956	33.8029	4.36	9.80663
2011-12-30 03:18:29	-52.4351	-45.8524	13.8661	108.209	3.66639	33.8046	4.42	9.80184
2011-12-30 03:19:30	-52.4354	-45.8468	13.8662	108.178	3.64958	33.8106	4.41602	9.79707
2011-12-30 03:20:30	-52.4357	-45.8412	13.8655	108.248	3.67712	33.8138	4.43302	9.7923
2011-12-30 03:21:30	-52.436	-45.8358	13.895	108.434	3.75648	33.8199	4.42	9.78755
2011-12-30 03:22:31	-52.4363	-45.8303	13.9706	108.687	3.86785	33.8217	4.34146	9.78279
2011-12-30 03:23:31	-52.4366	-45.8247	14.0264	108.987	3.99719	33.8234	4.3	9.77803
2011-12-30 03:24:32	-52.437	-45.8192	14.1319	109.378	4.17142	33.8266	4.21017	9.77325
2011-12-30 03:25:32	-52.4373	-45.8137	14.1923	109.835	4.36942	33.8298	4.2	9.76847
2011-12-30 03:26:32	-52.4377	-45.8082	14.2605	110.335	4.58963	33.8284	4.19158	9.76642
2011-12-30 03:27:33	-52.438	-45.8026	14.3522	110.867	4.82633	33.8275	4.15242	9.76509
2011-12-30 03:28:33	-52.4384	-45.7968	14.4296	111.367	5.04733	33.8288	4.12689	9.76388
2011-12-30 03:29:33	-52.4387	-45.7911	14.4805	111.807	5.2412	33.8272	4.13823	9.76263
2011-12-30 03:30:34	-52.4391	-45.7855	14.5308	112.161	5.39712	33.8269	4.12916	9.76138
2011-12-30 03:31:34	-52.4394	-45.7801	14.5445	112.455	5.52555	33.8277	4.17547	9.75999
2011-12-30 03:32:35	-52.4397	-45.7746	14.5356	112.717	5.63708	33.8297	4.24877	9.7586
2011-12-30 03:33:35	-52.44	-45.769	14.5697	112.923	5.7281	33.8244	4.23904	9.75731
2011-12-30 03:34:35	-52.4404	-45.7634	14.5998	113.086	5.79929	33.8284	4.22219	9.756
2011-12-30 03:35:36	-52.4407	-45.7578	14.6384	113.174	5.83826	33.8288	4.17159	9.75471
2011-12-30 03:36:36	-52.4411	-45.7522	14.6513	113.255	5.87315	33.8292	4.16923	9.75333
2011-12-30 03:37:37	-52.4414	-45.7467	14.6202	113.366	5.91809	33.831	4.24995	9.75199
2011-12-30 03:38:37	-52.4418	-45.7413	14.6323	113.468	5.96119	33.8325	4.25	9.75056
2011-12-30 03:39:37	-52.4421	-45.7359	14.6796	113.538	5.99287	33.8312	4.18316	9.7492
2011-12-30 03:40:38	-52.4424	-45.7305	14.7189	113.578	6.01069	33.8289	4.12	9.74784
2011-12-30 03:41:38	-52.4427	-45.725	14.7608	113.601	6.02197	33.8286	4.05316	9.74647
2011-12-30 03:42:39	-52.443	-45.7196	14.8515	113.62	6.0343	33.828	3.9	9.74512
2011-12-30 03:43:39	-52.4433	-45.714	14.9246	113.693	6.06905	33.8224	3.79	9.74384
2011-12-30 03:44:39	-52.4436	-45.7087	14.9672	113.736	6.08723	33.8195	3.7255	9.74096
2011-12-30 03:45:40	-52.444	-45.7032	14.9447	113.698	6.06431	33.8158	3.7537	9.73724
2011-12-30 03:46:40	-52.4444	-45.6978	14.9368	113.584	6.01164	33.806	3.75	9.7335
2011-12-30 03:47:40	-52.4448	-45.6924	14.9132	113.33	5.89552	33.8088	3.7321	9.72976
2011-12-30 03:48:41	-52.4453	-45.687	14.8419	112.918	5.70776	33.806	3.75876	9.726
2011-12-30 03:49:41	-52.4457	-45.6816	14.7743	112.363	5.45895	33.8039	3.74954	9.72226
2011-12-30 03:50:42	-52.4462	-45.6761	14.6977	111.726	5.17478	33.8057	3.73918	9.71851
2011-12-30 03:51:42	-52.4466	-45.6706	14.5468	111.135	4.90547	33.8052	3.8622	9.71475
2011-12-30 03:52:43	-52.4471	-45.6651	14.3541	110.686	4.69795	33.8117	4.10408	9.711
2011-12-30 03:53:43	-52.4476	-45.6597	14.2729	110.31	4.52806	33.8102	4.16566	9.70725
2011-12-30 03:54:43	-52.448	-45.6542	14.1859	110.005	4.38915	33.8114	4.25371	9.70347
2011-12-30 03:55:44	-52.4485	-45.6488	14.1294	109.814	4.30029	33.8188	4.31	9.69973
2011-12-30 03:56:44	-52.4489	-45.6433	14.1196	109.715	4.25408	33.8227	4.30535	9.69598
2011-12-30 03:57:45	-52.4494	-45.6378	14.0786	109.798	4.2846	33.8244	4.39624	9.69224
2011-12-30 03:58:45	-52.4498	-45.6323	14.1143	110.15	4.43491	33.8254	4.41308	9.68852
2011-12-30 03:59:45	-52.4503	-45.6268	14.1756	110.65	4.65013	33.8261	4.42217	9.68477
2011-12-30 04:00:46	-52.4507	-45.6214	14.2149	111.138	4.85768	33.8317	4.46302	9.68004
2011-12-30 04:01:46	-52.4511	-45.6159	14.321	111.564	5.04115	33.8362	4.37064	9.67482
2011-12-30 04:02:47	-52.4516	-45.6104	14.4187	111.941	5.20249	33.8392	4.28	9.66956
2011-12-30 04:03:49	-52.452	-45.6048	14.509	112.235	5.32804	33.8381	4.18588	9.66423
2011-12-30 04:04:51	-52.4524	-45.5991	14.6295	112.508	5.44732	33.8356	4.04138	9.65884
2011-12-30 04:05:53	-52.4528	-45.5935	14.7196	112.837	5.58677	33.8328	3.95322	9.65351
2011-12-30 04:06:54	-52.4532	-45.5881	14.7061	113.165	5.7195	33.835	4.04855	9.64829
2011-12-30 04:07:54	-52.4537	-45.5827	14.6712	113.462	5.83869	33.8324	4.18	9.64305
2011-12-30 04:08:54	-52.4541	-45.5773	14.6348	113.639	5.90605	33.8326	4.28478	9.63785
2011-12-30 04:09:54	-52.4546	-45.5719	14.6216	113.65	5.90409	33.8313	4.31171	9.6326
2011-12-30 04:10:55	-52.4551	-45.5665	14.6003	113.568	5.86196	33.83	4.33	9.62734
2011-12-30 04:11:55	-52.4555	-45.5612	14.6004	113.578	5.86039	33.8312	4.33253	9.62213
2011-12-30 04:12:56	-52.456	-45.5559	14.6358	113.783	5.94345	33.8319	4.31811	9.61687
2011-12-30 04:13:56	-52.4564	-45.5505	14.6849	113.997	6.0312	33.8333	4.28101	9.61163
2011-12-30 04:14:56	-52.4568	-45.5451	14.6979	114.107	6.072	33.8292	4.28	9.60646
2011-12-30 04:15:57	-52.4572	-45.5396	14.7112	114.14	6.08382	33.8246	4.2695	9.60329
2011-12-30 04:16:57	-52.4575	-45.5342	14.705	114.109	6.06707	33.8254	4.26864	9.60131
2011-12-30 04:17:58	-52.4579	-45.5287	14.6839	114.039	6.0345	33.827	4.29206	9.5993
2011-12-30 04:18:58	-52.4583	-45.5232	14.6838	113.927	5.9854	33.8294	4.27	9.59725
2011-12-30 04:19:58	-52.4587	-45.5176	14.6572	113.764	5.91283	33.8338	4.28	9.59532
2011-12-30 04:20:59	-52.4591	-45.5122	14.6367	113.599	5.83909	33.8333	4.2747	9.59328
2011-12-30 04:21:59	-52.4594	-45.5067	14.6273	113.507	5.79707	33.8338	4.27	9.5913
2011-12-30 04:23:00	-52.4598	-45.5012	14.6304	113.539	5.80821	33.8362	4.27	9.58934
2011-12-30 04:24:00	-52.4602	-45.4957	14.6436	113.662	5.85917	33.8337	4.27716	9.58738
2011-12-30 04:25:00	-52.4605	-45.4901	14.6503	113.801	5.91604	33.8327	4.29796	9.58542
2011-12-30 04:26:01	-52.4609	-45.4845	14.6806	113.96	5.98239	33.8297	4.27892	9.58352
2011-12-30 04:27:01	-52.4612	-45.479	14.706	114.147	6.06088	33.8313	4.28	9.5816
2011-12-30 04:28:02	-52.4615	-45.4736	14.7259	114.322	6.13177	33.8236	4.27925	9.57924
2011-12-30 04:29:02	-52.4619	-45.4682	14.7193	114.418	6.16606	33.8188	4.31	9.57501
2011-12-30 04:30:03	-52.4622	-45.4627	14.7371	114.426	6.16708	33.817	4.28766	9.5708
2011-12-30 04:31:03	-52.4626	-45.4572	14.7275	114.401	6.15038	33.8182	4.29689	9.56654
2011-12-30 04:32:03	-52.463	-45.4517	14.7112	114.313	6.10715	33.8183	4.30433	9.5623
2011-12-30 04:33:04	-52.4634	-45.4463	14.6868	114.101	6.01213	33.8183	4.3	9.55805
2011-12-30 04:34:04	-52.4637	-45.4409	14.6572	113.825	5.89022	33.8172	4.29102	9.55384
2011-12-30 04:35:05	-52.464	-45.4356	14.6186	113.562	5.77336	33.8166	4.3	9.54963
2011-12-30 04:36:05	-52.4643	-45.4302	14.5842	113.314	5.66299	33.8175	4.30424	9.54546
2011-12-30 04:37:06	-52.4646	-45.4249	14.5339	113.076	5.55556	33.8205	4.33807	9.54125
2011-12-30 04:38:06	-52.4649	-45.4195	14.5164	112.868	5.46347	33.8189	4.32217	9.53707
2011-12-30 04:39:06	-52.4652	-45.4142	14.4852	112.715	5.39304	33.8185	4.33988	9.53289
2011-12-30 04:40:07	-52.4655	-45.4088	14.4679	112.586	5.33351	33.8211	4.34	9.52869
2011-12-30 04:41:07	-52.4658	-45.4034	14.4458	112.491	5.2886	33.8223	4.35831	9.5245
2011-12-30 04:42:08	-52.466	-45.3982	14.4384	112.445	5.26402	33.8278	4.35743	9.52031
2011-12-30 04:43:08	-52.4663	-45.3929	14.4302	112.43	5.25324	33.8329	4.36987	9.51613
2011-12-30 04:44:09	-52.4666	-45.3875	14.4306	112.443	5.25438	33.8365	4.37236	9.51192
2011-12-30 04:45:09	-52.4669	-45.382	14.454	112.502	5.27618	33.8405	4.34519	9.50777
2011-12-30 04:46:09	-52.4672	-45.3766	14.4576	112.621	5.32155	33.8423	4.367	9.50359
2011-12-30 04:47:10	-52.4676	-45.3711	14.5055	112.786	5.38785	33.8399	4.32	9.49884
2011-12-30 04:48:10	-52.4679	-45.3655	14.5479	113.034	5.48666	33.84	4.2973	9.49383
2011-12-30 04:49:11	-52.4682	-45.3599	14.5766	113.361	5.61865	33.832	4.32459	9.48885
2011-12-30 04:50:11	-52.4685	-45.3544	14.6324	113.677	5.74752	33.8293	4.30105	9.4839
2011-12-30 04:51:11	-52.4688	-45.349	14.6591	113.955	5.85863	33.8293	4.32	9.47889
2011-12-30 04:52:12	-52.4691	-45.3435	14.6765	114.202	5.95435	33.8352	4.34	9.47391
2011-12-30 04:53:12	-52.4695	-45.338	14.7121	114.327	6.00144	33.84	4.30164	9.46885
2011-12-30 04:54:13	-52.4698	-45.3325	14.7407	114.357	6.0106	33.8435	4.26246	9.46388
2011-12-30 04:55:13	-52.4701	-45.3269	14.7868	114.368	6.01117	33.8422	4.18	9.45892
2011-12-30 04:56:14	-52.4704	-45.3214	14.8753	114.38	6.01576	33.8446	4.03	9.45391
2011-12-30 04:57:14	-52.4708	-45.316	14.9066	114.439	6.03633	33.839	3.99	9.44888
2011-12-30 04:58:14	-52.4711	-45.3106	14.9184	114.6	6.09607	33.8396	4.00195	9.44387
2011-12-30 04:59:15	-52.4714	-45.3052	14.9294	114.794	6.17026	33.8363	4.0268	9.43885
2011-12-30 05:00:15	-52.4718	-45.2997	14.9467	114.94	6.22429	33.8344	4.02784	9.4338
2011-12-30 05:01:16	-52.4722	-45.294	14.9535	114.978	6.23524	33.8342	4.03	9.42872
2011-12-30 05:02:16	-52.4726	-45.2885	14.912	114.908	6.19648	33.8349	4.07893	9.4237
2011-12-30 05:03:17	-52.473	-45.2829	14.8812	114.771	6.13426	33.8398	4.10964	9.41866
2011-12-30 05:04:17	-52.4733	-45.2774	14.8408	114.597	6.05252	33.8422	4.13	9.41362
2011-12-30 05:05:17	-52.4737	-45.2718	14.7984	114.468	5.99519	33.8448	4.18	9.41087
2011-12-30 05:06:18	-52.4741	-45.2662	14.7883	114.398	5.96341	33.8464	4.18272	9.40851
2011-12-30 05:07:18	-52.4744	-45.2606	14.8	114.382	5.95467	33.8495	4.15716	9.40618
2011-12-30 05:08:19	-52.4747	-45.2551	14.8305	114.474	5.99139	33.8487	4.12575	9.40385
2011-12-30 05:09:19	-52.4751	-45.2496	14.8901	114.639	6.05946	33.8481	4.06	9.40151
2011-12-30 05:10:19	-52.4754	-45.2442	14.9361	114.861	6.14895	33.8458	4.02846	9.39907
2011-12-30 05:11:20	-52.4757	-45.2387	14.9938	115.108	6.24903	33.8437	3.98348	9.39614
2011-12-30 05:12:20	-52.4761	-45.2332	15.0512	115.357	6.34914	33.8387	3.94513	9.39176
2011-12-30 05:13:21	-52.4764	-45.2277	15.1051	115.573	6.43412	33.8369	3.9	9.38741
2011-12-30 05:14:21	-52.4768	-45.2222	15.1536	115.69	6.47859	33.8346	3.84085	9.38305
2011-12-30 05:15:22	-52.4771	-45.2166	15.1878	115.666	6.46611	33.8295	3.77999	9.37872
2011-12-30 05:16:22	-52.4775	-45.211	15.2168	115.504	6.39806	33.8213	3.7	9.37438
2011-12-30 05:17:22	-52.4778	-45.2054	15.2123	115.254	6.2907	33.8204	3.64829	9.37005
2011-12-30 05:18:23	-52.4782	-45.2	15.2234	114.959	6.16714	33.8163	3.5652	9.36569
2011-12-30 05:19:23	-52.4785	-45.1944	15.1924	114.604	6.01635	33.8149	3.53644	9.36139
2011-12-30 05:20:24	-52.4788	-45.189	15.1573	114.149	5.82565	33.8127	3.49564	9.35707
2011-12-30 05:21:24	-52.4792	-45.1835	15.1273	113.617	5.60397	33.8095	3.42473	9.35271
2011-12-30 05:22:25	-52.4796	-45.178	15.0702	112.997	5.3461	33.8087	3.38404	9.34835
2011-12-30 05:23:25	-52.4799	-45.1724	15.0109	112.343	5.07458	33.8055	3.34	9.34406
2011-12-30 05:24:25	-52.4802	-45.1669	14.9029	111.707	4.80766	33.8005	3.37777	9.33973
2011-12-30 05:25:26	-52.4805	-45.1613	14.8181	111.08	4.5466	33.8008	3.38155	9.33543
2011-12-30 05:26:26	-52.4809	-45.1556	14.7276	110.491	4.30016	33.7982	3.4	9.33111
2011-12-30 05:27:27	-52.4812	-45.15	14.6679	109.948	4.0749	33.7973	3.38002	9.32685
2011-12-30 05:28:27	-52.4815	-45.1444	14.584	109.443	3.86414	33.8002	3.40917	9.32253
2011-12-30 05:29:27	-52.4819	-45.1388	14.5121	109.009	3.68338	33.7982	3.43849	9.31821
2011-12-30 05:30:28	-52.4822	-45.1333	14.4608	108.628	3.5239	33.8015	3.4353	9.31391
2011-12-30 05:31:28	-52.4825	-45.1278	14.4047	108.3	3.38615	33.7997	3.45387	9.30961
2011-12-30 05:32:28	-52.4828	-45.1224	14.3758	108.054	3.28386	33.8027	3.45385	9.30524
2011-12-30 05:33:29	-52.4831	-45.1171	14.3669	107.85	3.19854	33.7977	3.42	9.30089
2011-12-30 05:34:29	-52.4834	-45.1116	14.325	107.694	3.13111	33.8038	3.45535	9.29651
2011-12-30 05:35:30	-52.4837	-45.1061	14.3178	107.566	3.07709	33.802	3.44	9.29218
2011-12-30 05:36:30	-52.484	-45.1005	14.2867	107.463	3.03191	33.8017	3.47367	9.28781
2011-12-30 05:37:30	-52.4843	-45.0948	14.2926	107.37	2.99108	33.8019	3.43	9.28349
2011-12-30 05:38:31	-52.4847	-45.0891	14.2689	107.299	2.95977	33.8044	3.4616	9.27913
2011-12-30 05:39:31	-52.485	-45.0836	14.2777	107.237	2.93273	33.8029	3.42921	9.27477
2011-12-30 05:40:31	-52.4853	-45.0781	14.2678	107.199	2.91471	33.8046	3.44	9.27043
2011-12-30 05:41:32	-52.4856	-45.0726	14.2518	107.167	2.89883	33.8052	3.46	9.26602
2011-12-30 05:42:32	-52.4859	-45.0671	14.2453	107.141	2.88561	33.805	3.4668	9.26162
2011-12-30 05:43:33	-52.4863	-45.0616	14.2492	107.113	2.87205	33.8035	3.45233	9.25725
2011-12-30 05:44:33	-52.4866	-45.056	14.2493	107.091	2.86025	33.8057	3.44328	9.25285
2011-12-30 05:45:34	-52.4869	-45.0506	14.2306	107.072	2.85001	33.8066	3.47406	9.24846
2011-12-30 05:46:34	-52.4872	-45.0451	14.2282	107.072	2.84748	33.8054	3.48	9.24407
2011-12-30 05:47:34	-52.4875	-45.0395	14.2316	107.067	2.84282	33.8052	3.47186	9.23975
2011-12-30 05:48:35	-52.4879	-45.0339	14.2163	107.052	2.8342	33.8068	3.5	9.23538
2011-12-30 05:49:35	-52.4881	-45.0286	14.2338	107.049	2.83114	33.8078	3.46444	9.23105
2011-12-30 05:50:36	-52.4884	-45.0233	14.205	107.04	2.82358	33.8082	3.50858	9.22666
2011-12-30 05:51:36	-52.4887	-45.0179	14.2015	107.03	2.81773	33.8085	3.52047	9.22225
2011-12-30 05:52:37	-52.489	-45.0126	14.2165	107.015	2.80968	33.8068	3.49027	9.21782
2011-12-30 05:53:37	-52.4893	-45.0071	14.2028	107.02	2.80861	33.8084	3.50877	9.21459
2011-12-30 05:54:38	-52.4896	-45.0017	14.1934	107.045	2.81678	33.8066	3.5379	9.21097
2011-12-30 05:55:38	-52.4899	-44.9962	14.2094	107.064	2.82238	33.8091	3.51	9.20719
2011-12-30 05:56:38	-52.4902	-44.9908	14.2162	107.073	2.82406	33.8093	3.5	9.20342
2011-12-30 05:57:39	-52.4905	-44.9853	14.2139	107.076	2.823	33.8098	3.5048	9.19971
2011-12-30 05:58:39	-52.4908	-44.9797	14.2004	107.078	2.82124	33.8077	3.53	9.19595
2011-12-30 05:59:40	-52.4911	-44.974	14.2007	107.072	2.8167	33.8091	3.52679	9.19224
2011-12-30 06:00:40	-52.4914	-44.9684	14.1971	107.08	2.81897	33.8067	3.53216	9.19154
2011-12-30 06:01:41	-52.4917	-44.9629	14.2029	107.083	2.82152	33.8086	3.52866	9.19235
2011-12-30 06:02:41	-52.492	-44.9575	14.2061	107.086	2.823	33.806	3.52032	9.19309
2011-12-30 06:03:42	-52.4923	-44.9521	14.2046	107.106	2.83103	33.8088	3.52859	9.19384
2011-12-30 06:04:42	-52.4926	-44.9468	14.1982	107.107	2.83156	33.8102	3.53849	9.19455
2011-12-30 06:05:43	-52.4929	-44.9416	14.213	107.099	2.82991	33.8083	3.51499	9.19517
2011-12-30 06:06:43	-52.4933	-44.9362	14.1961	107.108	2.83279	33.8085	3.54339	9.19581
2011-12-30 06:07:44	-52.4935	-44.9309	14.1932	107.096	2.82833	33.8081	3.5444	9.19654
2011-12-30 06:08:44	-52.4939	-44.9256	14.1942	107.094	2.82795	33.8065	3.54512	9.19717
2011-12-30 06:09:44	-52.4942	-44.9203	14.1938	107.108	2.83351	33.8077	3.54587	9.19787
2011-12-30 06:10:45	-52.4945	-44.9149	14.2027	107.106	2.83388	33.8091	3.53338	9.19859
2011-12-30 06:11:45	-52.4949	-44.9095	14.1965	107.11	2.83558	33.8096	3.54257	9.19923
2011-12-30 06:12:46	-52.4952	-44.904	14.1984	107.119	2.83965	33.8071	3.54166	9.19994
2011-12-30 06:13:46	-52.4956	-44.8985	14.1999	107.111	2.83697	33.8097	3.53901	9.20062
2011-12-30 06:14:46	-52.496	-44.893	14.1891	107.109	2.83533	33.8056	3.5502	9.20126
2011-12-30 06:15:47	-52.4964	-44.8875	14.188	107.111	2.83702	33.8073	3.55936	9.20191
2011-12-30 06:16:47	-52.4968	-44.882	14.1692	107.102	2.83301	33.8055	3.58857	9.20251
2011-12-30 06:17:48	-52.4972	-44.8765	14.1704	107.058	2.81673	33.8095	3.58	9.20319
2011-12-30 06:18:48	-52.4976	-44.8712	14.1702	107.035	2.80784	33.8052	3.57399	9.20416
2011-12-30 06:19:48	-52.4979	-44.8658	14.1609	107.058	2.81705	33.8052	3.59223	9.2053
2011-12-30 06:20:49	-52.4983	-44.8604	14.18	107.082	2.82812	33.8049	3.56845	9.20643
2011-12-30 06:21:49	-52.4988	-44.8548	14.1772	107.096	2.83413	33.8044	3.57453	9.20754
2011-12-30 06:22:50	-52.4992	-44.8493	14.1745	107.107	2.83912	33.8038	3.58383	9.20871
2011-12-30 06:23:50	-52.4996	-44.8438	14.1768	107.105	2.83859	33.8066	3.57482	9.20984
2011-12-30 06:24:50	-52.5	-44.8384	14.1723	107.087	2.83239	33.8043	3.58	9.21096
2011-12-30 06:25:51	-52.5004	-44.8332	14.1983	107.094	2.83659	33.8024	3.53848	9.21196
2011-12-30 06:26:51	-52.5008	-44.8278	14.1849	107.101	2.83955	33.8031	3.56128	9.21298
2011-12-30 06:27:52	-52.5013	-44.8223	14.1726	107.087	2.83407	33.8022	3.57997	9.2141
2011-12-30 06:28:52	-52.5017	-44.8168	14.1796	107.063	2.82559	33.8016	3.56176	9.21523
2011-12-30 06:29:52	-52.5021	-44.8113	14.1769	107.078	2.83271	33.8011	3.57845	9.21629
2011-12-30 06:30:53	-52.5026	-44.8058	14.1819	107.103	2.84295	33.7992	3.57245	9.21743
2011-12-30 06:31:53	-52.503	-44.8003	14.1804	107.11	2.84626	33.8023	3.57341	9.2185
2011-12-30 06:32:54	-52.5035	-44.7947	14.1953	107.127	2.85379	33.8005	3.54741	9.2196
2011-12-30 06:33:54	-52.504	-44.7892	14.1833	107.145	2.86102	33.7998	3.57519	9.22063
2011-12-30 06:34:54	-52.5045	-44.7836	14.1883	107.137	2.85881	33.7999	3.56586	9.22173
2011-12-30 06:35:55	-52.5049	-44.778	14.1912	107.139	2.86036	33.7982	3.56	9.22293
2011-12-30 06:36:55	-52.5053	-44.7724	14.2077	107.154	2.86743	33.7983	3.53249	9.22414
2011-12-30 06:37:56	-52.5057	-44.7669	14.2123	107.15	2.86671	33.7972	3.5316	9.22373
2011-12-30 06:38:56	-52.5061	-44.7613	14.2203	107.164	2.87087	33.7939	3.51176	9.22247
2011-12-30 06:39:56	-52.5065	-44.7558	14.2141	107.185	2.87853	33.7945	3.53005	9.22125
2011-12-30 06:40:57	-52.5069	-44.7503	14.2284	107.169	2.87171	33.7912	3.50074	9.22001
2011-12-30 06:41:57	-52.5073	-44.7447	14.2305	107.16	2.86809	33.792	3.5	9.21876
2011-12-30 06:42:58	-52.5077	-44.7392	14.224	107.155	2.86621	33.7912	3.51	9.2191
2011-12-30 06:43:58	-52.508	-44.7336	14.2216	107.14	2.86088	33.7914	3.51	9.22039
2011-12-30 06:44:59	-52.5084	-44.728	14.2184	107.141	2.86146	33.7899	3.51	9.22176
2011-12-30 06:45:59	-52.5088	-44.7226	14.2238	107.155	2.86824	33.7892	3.51	9.22298
2011-12-30 06:47:00	-52.5092	-44.7171	14.2288	107.167	2.87341	33.7907	3.5	9.22423
2011-12-30 06:48:00	-52.5096	-44.7116	14.2328	107.18	2.87993	33.7893	3.5	9.22548
2011-12-30 06:49:00	-52.5099	-44.706	14.2344	107.207	2.89126	33.791	3.50209	9.22688
2011-12-30 06:50:01	-52.5102	-44.7006	14.239	107.233	2.90289	33.7906	3.50109	9.22819
2011-12-30 06:51:01	-52.5105	-44.6953	14.2414	107.258	2.91341	33.7892	3.50038	9.22945
2011-12-30 06:52:02	-52.5108	-44.69	14.2489	107.296	2.92972	33.7889	3.49929	9.23073
2011-12-30 06:53:02	-52.5111	-44.6846	14.2576	107.323	2.94132	33.7878	3.49	9.23202
2011-12-30 06:54:02	-52.5114	-44.6792	14.2538	107.343	2.94983	33.7884	3.5	9.23332
2011-12-30 06:55:03	-52.5117	-44.6737	14.2612	107.37	2.96178	33.7878	3.49287	9.23475
2011-12-30 06:56:03	-52.5119	-44.6683	14.2573	107.389	2.96996	33.7866	3.50616	9.23607
2011-12-30 06:57:04	-52.5123	-44.663	14.2618	107.399	2.97483	33.7855	3.5	9.23736
2011-12-30 06:58:04	-52.5126	-44.6575	14.2533	107.402	2.97671	33.7823	3.51856	9.2387
2011-12-30 06:59:05	-52.5129	-44.6519	14.2424	107.405	2.97851	33.7822	3.53662	9.24011
2011-12-30 07:00:05	-52.5132	-44.6463	14.2585	107.431	2.99002	33.7845	3.51273	9.24154
2011-12-30 07:01:06	-52.5135	-44.6406	14.2616	107.439	2.99426	33.7839	3.51193	9.24298
2011-12-30 07:02:06	-52.5138	-44.6351	14.2516	107.442	2.99586	33.7863	3.5288	9.24436
2011-12-30 07:03:06	-52.5141	-44.6295	14.276	107.464	3.00746	33.7857	3.5	9.24582
2011-12-30 07:04:07	-52.5144	-44.624	14.2813	107.467	3.00867	33.784	3.48072	9.24737
2011-12-30 07:05:07	-52.5147	-44.6185	14.2584	107.471	3.0113	33.7854	3.53	9.24952
2011-12-30 07:06:08	-52.515	-44.613	14.2631	107.459	3.00816	33.7864	3.51769	9.25172
2011-12-30 07:07:08	-52.5153	-44.6077	14.2584	107.462	3.01015	33.787	3.52398	9.2537
2011-12-30 07:08:08	-52.5157	-44.6022	14.264	107.5	3.02672	33.7862	3.52395	9.25581
2011-12-30 07:09:09	-52.5161	-44.5966	14.2759	107.528	3.03979	33.7867	3.51	9.25792
2011-12-30 07:10:09	-52.5164	-44.591	14.2745	107.541	3.04613	33.7864	3.5157	9.26005
2011-12-30 07:11:10	-52.5168	-44.5855	14.2668	107.563	3.05583	33.7889	3.53336	9.2622
2011-12-30 07:12:10	-52.5171	-44.5799	14.2605	107.607	3.07467	33.7879	3.55507	9.2644
2011-12-30 07:13:11	-52.5175	-44.5744	14.2644	107.641	3.0892	33.7881	3.55144	9.26653
2011-12-30 07:14:11	-52.5179	-44.5688	14.2666	107.684	3.1078	33.7919	3.56	9.26859
2011-12-30 07:15:12	-52.5183	-44.5632	14.2877	107.712	3.1214	33.7929	3.53038	9.27072
2011-12-30 07:16:12	-52.5186	-44.5576	14.2828	107.748	3.13703	33.7915	3.5476	9.27292
2011-12-30 07:17:13	-52.5191	-44.552	14.2719	107.806	3.16135	33.7851	3.58214	9.27492
2011-12-30 07:18:13	-52.5195	-44.5465	14.2796	107.868	3.18787	33.7958	3.58601	9.27698
2011-12-30 07:19:13	-52.5199	-44.5409	14.2987	107.92	3.21017	33.7964	3.56	9.27908
2011-12-30 07:20:14	-52.5203	-44.5354	14.2991	107.972	3.23279	33.799	3.57495	9.28105
2011-12-30 07:21:14	-52.5208	-44.5299	14.3147	108.049	3.26309	33.7987	3.56424	9.27931
2011-12-30 07:22:15	-52.5212	-44.5245	14.3287	108.111	3.28721	33.8	3.55327	9.27755
2011-12-30 07:23:15	-52.5216	-44.519	14.3449	108.177	3.31308	33.8	3.54251	9.27581
2011-12-30 07:24:16	-52.522	-44.5134	14.3576	108.265	3.34765	33.802	3.54161	9.27406
2011-12-30 07:25:16	-52.5224	-44.5079	14.3615	108.348	3.3803	33.8022	3.55768	9.27231
2011-12-30 07:26:17	-52.5228	-44.5025	14.3879	108.451	3.42087	33.8028	3.52996	9.27055
2011-12-30 07:27:17	-52.5233	-44.4969	14.3992	108.553	3.46027	33.802	3.53	9.26876
2011-12-30 07:28:17	-52.5237	-44.4913	14.4387	108.61	3.48424	33.8016	3.48	9.26701
2011-12-30 07:29:18	-52.5241	-44.4858	14.4211	108.671	3.50697	33.8007	3.52759	9.26528
2011-12-30 07:30:18	-52.5245	-44.4802	14.4552	108.722	3.52661	33.7991	3.47364	9.26352
2011-12-30 07:31:19	-52.5249	-44.4746	14.4533	108.751	3.5377	33.8021	3.48734	9.26206
2011-12-30 07:32:19	-52.5253	-44.4691	14.4623	108.784	3.5524	33.8015	3.48	9.2636
2011-12-30 07:33:19	-52.5257	-44.4636	14.48	108.808	3.5633	33.8016	3.45195	9.26519
2011-12-30 07:34:20	-52.5261	-44.4581	14.4816	108.813	3.56689	33.8015	3.45319	9.26671
2011-12-30 07:35:20	-52.5265	-44.4528	14.5094	108.803	3.565	33.7986	3.40302	9.26812
2011-12-30 07:36:21	-52.5269	-44.4473	14.4974	108.792	3.561	33.7994	3.41807	9.26961
2011-12-30 07:37:21	-52.5274	-44.4419	14.4999	108.765	3.55078	33.8016	3.40394	9.271
2011-12-30 07:38:22	-52.5278	-44.4365	14.485	108.74	3.54172	33.7964	3.4297	9.27244
2011-12-30 07:39:22	-52.5282	-44.4311	14.4667	108.709	3.52987	33.7977	3.45591	9.27388
2011-12-30 07:40:22	-52.5285	-44.4257	14.4929	108.675	3.51826	33.7989	3.40158	9.27539
2011-12-30 07:41:23	-52.5289	-44.4202	14.474	108.651	3.50781	33.7954	3.4192	9.27693
2011-12-30 07:42:23	-52.5293	-44.4149	14.4798	108.6	3.48891	33.7931	3.4	9.27834
2011-12-30 07:43:24	-52.5297	-44.4095	14.4892	108.557	3.47429	33.7928	3.38259	9.27977
2011-12-30 07:44:24	-52.5301	-44.4041	14.482	108.52	3.45929	33.7893	3.38	9.28123
2011-12-30 07:45:25	-52.5305	-44.3986	14.4835	108.452	3.4332	33.7898	3.36	9.28273
2011-12-30 07:46:25	-52.5309	-44.3931	14.489	108.404	3.41504	33.7892	3.34	9.28427
2011-12-30 07:47:25	-52.5312	-44.3876	14.4868	108.382	3.40759	33.7892	3.34	9.28593
2011-12-30 07:48:26	-52.5316	-44.3823	14.494	108.339	3.39236	33.7876	3.32271	9.28742
2011-12-30 07:49:26	-52.5319	-44.377	14.4835	108.273	3.36552	33.7837	3.32	9.28893
2011-12-30 07:50:27	-52.5323	-44.3716	14.4765	108.2	3.33778	33.7837	3.31861	9.29084
2011-12-30 07:51:27	-52.5326	-44.3662	14.4833	108.13	3.31127	33.7796	3.29	9.29313
2011-12-30 07:52:28	-52.5329	-44.3607	14.4738	108.081	3.2923	33.7839	3.29	9.29543
2011-12-30 07:53:28	-52.5333	-44.3553	14.4573	108.01	3.26494	33.784	3.30431	9.29771
2011-12-30 07:54:29	-52.5336	-44.3499	14.4452	107.955	3.24378	33.783	3.31285	9.29991
2011-12-30 07:55:29	-52.534	-44.3445	14.4368	107.903	3.22427	33.7811	3.31961	9.30211
2011-12-30 07:56:29	-52.5344	-44.3391	14.4176	107.813	3.18881	33.7804	3.33202	9.30434
2011-12-30 07:57:30	-52.5347	-44.3338	14.3925	107.703	3.14488	33.7842	3.35039	9.30657
2011-12-30 07:58:30	-52.535	-44.3283	14.3812	107.608	3.10744	33.7842	3.3456	9.30888
2011-12-30 07:59:31	-52.5353	-44.3232	14.3685	107.559	3.08869	33.7853	3.35907	9.31099
2011-12-30 08:00:31	-52.5357	-44.3179	14.3552	107.518	3.07277	33.7845	3.37273	9.31314
2011-12-30 08:01:32	-52.536	-44.3125	14.3335	107.474	3.05545	33.7864	3.39802	9.31535
2011-12-30 08:02:32	-52.5364	-44.3072	14.35	107.469	3.05519	33.7859	3.36786	9.31748
2011-12-30 08:03:32	-52.5367	-44.3019	14.3477	107.491	3.06588	33.786	3.38	9.31965
2011-12-30 08:04:33	-52.537	-44.2967	14.3381	107.515	3.07473	33.786	3.39939	9.31976
2011-12-30 08:05:33	-52.5373	-44.2916	14.3381	107.559	3.09174	33.7901	3.41138	9.31783
2011-12-30 08:06:34	-52.5377	-44.2865	14.3256	107.614	3.11289	33.7896	3.45283	9.31584
2011-12-30 08:07:34	-52.538	-44.2814	14.3249	107.673	3.13453	33.7898	3.46	9.3139
2011-12-30 08:08:34	-52.5383	-44.2762	14.2291	107.781	3.17453	33.7869	3.66548	9.31193
2011-12-30 08:09:35	-52.5386	-44.271	14.1323	107.89	3.21399	33.805	3.86957	9.30998
2011-12-30 08:10:35	-52.539	-44.2658	13.9738	107.983	3.24435	33.8118	4.18	9.308
2011-12-30 08:11:36	-52.5394	-44.2605	13.8419	108.069	3.27214	33.8303	4.43971	9.30601
2011-12-30 08:12:36	-52.5398	-44.2552	13.7517	108.169	3.30727	33.8436	4.63223	9.30401
2011-12-30 08:13:37	-52.5402	-44.25	13.7034	108.247	3.33576	33.8479	4.74461	9.30201
2011-12-30 08:14:37	-52.5406	-44.2449	13.6691	108.372	3.38328	33.8559	4.84073	9.30001
2011-12-30 08:15:38	-52.5409	-44.2398	13.6695	108.679	3.50416	33.8612	4.91058	9.29803
2011-12-30 08:16:38	-52.5413	-44.2346	13.7151	109.27	3.74082	33.8644	4.97106	9.29607
2011-12-30 08:17:38	-52.5416	-44.2295	13.824	110.192	4.11059	33.8674	4.9818	9.2941
2011-12-30 08:18:39	-52.542	-44.2244	13.9651	111.383	4.58794	33.8679	4.99275	9.29207
2011-12-30 08:19:39	-52.5424	-44.2193	14.1291	112.72	5.12556	33.8691	5.0036	9.29008
2011-12-30 08:20:40	-52.5428	-44.2141	14.3103	114.07	5.66765	33.8714	4.98	9.28809
2011-12-30 08:21:40	-52.543	-44.2089	14.4582	115.34	6.17571	33.8722	4.99944	9.2862
2011-12-30 08:22:40	-52.5434	-44.2039	14.6087	116.469	6.63117	33.8721	4.98592	9.28594
2011-12-30 08:23:41	-52.5439	-44.1987	14.7237	117.423	7.01712	33.8723	4.99656	9.28706
2011-12-30 08:24:41	-52.5442	-44.1935	14.791	118.208	7.33121	33.8681	5.04475	9.28827
2011-12-30 08:25:42	-52.5445	-44.1884	14.8724	118.856	7.59545	33.8685	5.05	9.28958
2011-12-30 08:26:42	-52.5449	-44.1834	14.9182	119.389	7.80999	33.8705	5.08624	9.29062
2011-12-30 08:27:42	-52.5454	-44.1782	14.9894	119.835	7.99266	33.8705	5.05959	9.29169
2011-12-30 08:28:43	-52.5458	-44.1731	15.0321	120.235	8.1571	33.8696	5.07911	9.29287
2011-12-30 08:29:43	-52.5462	-44.1678	15.0809	120.58	8.29651	33.871	5.06227	9.29406
2011-12-30 08:30:43	-52.5466	-44.1626	15.1061	120.905	8.42887	33.8732	5.09	9.29525
2011-12-30 08:31:44	-52.5471	-44.1574	15.1636	121.204	8.55206	33.8744	5.05264	9.29637
2011-12-30 08:32:44	-52.5474	-44.1522	15.1828	121.464	8.65658	33.8753	5.07	9.29764
2011-12-30 08:33:45	-52.5477	-44.1471	15.2146	121.701	8.75491	33.8746	5.0682	9.29884
2011-12-30 08:34:45	-52.5481	-44.1419	15.2405	121.906	8.83878	33.8783	5.06466	9.30002
2011-12-30 08:35:45	-52.5485	-44.1366	15.2424	122.076	8.9092	33.875	5.10245	9.30123
2011-12-30 08:36:46	-52.5489	-44.1314	15.2876	122.227	8.9761	33.8762	5.06255	9.30247
2011-12-30 08:37:46	-52.5492	-44.1262	15.3008	122.349	9.0266	33.8764	5.06292	9.30376
2011-12-30 08:38:46	-52.5496	-44.121	15.312	122.437	9.06429	33.8771	5.06457	9.30456
2011-12-30 08:39:47	-52.5499	-44.1159	15.3088	122.491	9.08603	33.8762	5.08	9.30523
2011-12-30 08:40:47	-52.5502	-44.1107	15.3331	122.533	9.10666	33.8742	5.05	9.30591
2011-12-30 08:41:47	-52.5506	-44.1054	15.3505	122.571	9.122	33.8763	5.02037	9.30663
2011-12-30 08:42:48	-52.5508	-44.1002	15.3514	122.6	9.13647	33.8782	5.03	9.30741
2011-12-30 08:43:48	-52.5511	-44.095	15.3572	122.617	9.14787	33.8741	5.033	9.30816
2011-12-30 08:44:49	-52.5513	-44.0898	15.3554	122.604	9.14288	33.8763	5.03	9.30899
2011-12-30 08:45:49	-52.5516	-44.0845	15.3546	122.569	9.13093	33.8804	5.02534	9.30979
2011-12-30 08:46:49	-52.5519	-44.0793	15.365	122.507	9.1074	33.8809	4.99	9.31053
2011-12-30 08:47:50	-52.5521	-44.0742	15.3586	122.445	9.0832	33.881	4.98549	9.31125
2011-12-30 08:48:50	-52.5524	-44.0691	15.3532	122.373	9.05892	33.8798	4.99	9.31191
2011-12-30 08:49:51	-52.5527	-44.064	15.3529	122.306	9.03114	33.8795	4.97149	9.31201
2011-12-30 08:50:51	-52.5531	-44.0588	15.3641	122.311	9.03014	33.8777	4.95291	9.30993
2011-12-30 08:51:51	-52.5534	-44.0536	15.3563	122.363	9.04394	33.8768	4.97	9.30787
2011-12-30 08:52:52	-52.5536	-44.0484	15.374	122.441	9.07401	33.8782	4.96127	9.3059
2011-12-30 08:53:52	-52.554	-44.0433	15.3917	122.56	9.11974	33.8796	4.96036	9.30381
2011-12-30 08:54:53	-52.5543	-44.0381	15.4071	122.693	9.16859	33.879	4.95932	9.30175
2011-12-30 08:55:53	-52.5547	-44.0328	15.4336	122.814	9.21507	33.8795	4.94127	9.29967
2011-12-30 08:56:54	-52.5551	-44.0275	15.435	122.89	9.23903	33.8795	4.94791	9.2976
2011-12-30 08:57:54	-52.5554	-44.0222	15.4542	122.929	9.2531	33.8795	4.92691	9.29553
2011-12-30 08:58:54	-52.5558	-44.017	15.4521	122.98	9.26994	33.8786	4.94393	9.29346
2011-12-30 08:59:55	-52.5562	-44.0117	15.4802	122.991	9.27299	33.8788	4.89958	9.29137
2011-12-30 09:00:55	-52.5565	-44.0065	15.4808	122.991	9.2694	33.878	4.89845	9.28931
2011-12-30 09:01:56	-52.5569	-44.0012	15.4795	122.984	9.26177	33.8799	4.8966	9.2872
2011-12-30 09:02:56	-52.5573	-43.996	15.4732	122.966	9.25154	33.8766	4.90757	9.2851
2011-12-30 09:03:57	-52.5577	-43.9907	15.4665	122.935	9.2332	33.8758	4.90669	9.28305
2011-12-30 09:04:57	-52.5581	-43.9855	15.4793	122.897	9.2168	33.8759	4.88078	9.28094
2011-12-30 09:05:57	-52.5585	-43.9802	15.4741	122.855	9.1957	33.876	4.88	9.27885
2011-12-30 09:06:58	-52.5588	-43.9749	15.4486	122.815	9.17281	33.8765	4.91	9.27677
2011-12-30 09:07:58	-52.5591	-43.9695	15.4562	122.734	9.13869	33.8744	4.88192	9.27476
2011-12-30 09:08:59	-52.5595	-43.9642	15.4341	122.655	9.10454	33.8736	4.91	9.27273
2011-12-30 09:09:59	-52.5597	-43.9588	15.4307	122.587	9.07239	33.8729	4.89642	9.27076
2011-12-30 09:11:00	-52.56	-43.9533	15.4272	122.477	9.02727	33.8713	4.88434	9.26877
2011-12-30 09:12:00	-52.5603	-43.948	15.4066	122.348	8.97073	33.87	4.89	9.26676
2011-12-30 09:13:01	-52.5606	-43.9427	15.3936	122.207	8.91105	33.8716	4.88172	9.26475
2011-12-30 09:14:01	-52.5609	-43.9373	15.3888	122.033	8.84146	33.8703	4.85603	9.26346
2011-12-30 09:15:01	-52.5612	-43.9319	15.3622	121.868	8.77357	33.8715	4.8621	9.26348
2011-12-30 09:16:02	-52.5615	-43.9266	15.3307	121.687	8.70053	33.8707	4.8774	9.26349
2011-12-30 09:17:02	-52.5618	-43.9213	15.2989	121.501	8.62437	33.8689	4.88951	9.26347
2011-12-30 09:18:03	-52.5621	-43.916	15.2893	121.33	8.5569	33.8692	4.87	9.26342
2011-12-30 09:19:03	-52.5624	-43.9108	15.2622	121.16	8.49054	33.8678	4.88789	9.26332
2011-12-30 09:20:03	-52.5627	-43.9055	15.2486	121.013	8.43116	33.868	4.87812	9.26322
2011-12-30 09:21:04	-52.5631	-43.9002	15.2217	120.87	8.37134	33.8706	4.88724	9.26313
2011-12-30 09:22:04	-52.5635	-43.8949	15.2148	120.739	8.31997	33.8687	4.87357	9.26298
2011-12-30 09:23:05	-52.5639	-43.8895	15.1815	120.646	8.28069	33.8669	4.91	9.26295
2011-12-30 09:24:05	-52.5642	-43.884	15.1829	120.545	8.24113	33.8679	4.88449	9.26293
2011-12-30 09:25:06	-52.5645	-43.8787	15.1684	120.46	8.20639	33.868	4.89	9.26297
2011-12-30 09:26:06	-52.5648	-43.8735	15.1612	120.391	8.179	33.8671	4.89	9.26256
2011-12-30 09:27:07	-52.5652	-43.8682	15.1785	120.324	8.1531	33.867	4.84796	9.26149
2011-12-30 09:28:07	-52.5655	-43.8629	15.1575	120.273	8.12877	33.8669	4.87	9.26044
2011-12-30 09:29:07	-52.5659	-43.8575	15.1407	120.221	8.10604	33.8686	4.88973	9.25939
2011-12-30 09:30:08	-52.5662	-43.8521	15.1308	120.164	8.08013	33.8676	4.89	9.2583
2011-12-30 09:31:08	-52.5666	-43.8467	15.1269	120.112	8.05836	33.8672	4.88841	9.25726
2011-12-30 09:32:09	-52.567	-43.8411	15.1462	120.085	8.04857	33.866	4.85235	9.25627
2011-12-30 09:33:09	-52.5672	-43.8357	15.1263	120.06	8.03464	33.8675	4.87652	9.25535
2011-12-30 09:34:10	-52.5675	-43.8304	15.1336	120.051	8.03027	33.8676	4.86398	9.25415
2011-12-30 09:35:10	-52.5679	-43.825	15.1135	120.058	8.02784	33.8676	4.90024	9.25192
2011-12-30 09:36:10	-52.5682	-43.8197	15.1232	120.086	8.03591	33.8693	4.89	9.24968
2011-12-30 09:37:11	-52.5685	-43.8142	15.1327	120.133	8.05152	33.8676	4.88347	9.24749
2011-12-30 09:38:11	-52.5688	-43.8086	15.1352	120.167	8.06148	33.8675	4.88774	9.24531
2011-12-30 09:39:12	-52.5692	-43.8031	15.1317	120.233	8.08403	33.868	4.91	9.24305
2011-12-30 09:40:12	-52.5695	-43.7975	15.1586	120.33	8.11876	33.8687	4.87911	9.24083
2011-12-30 09:41:13	-52.5699	-43.7918	15.1611	120.421	8.14973	33.8692	4.89006	9.23864
2011-12-30 09:42:13	-52.5701	-43.7861	15.1849	120.512	8.18647	33.87	4.88096	9.23649
2011-12-30 09:43:13	-52.5705	-43.7805	15.1824	120.609	8.22038	33.8693	4.90654	9.23425
2011-12-30 09:44:14	-52.5708	-43.775	15.2154	120.719	8.26211	33.8687	4.87263	9.23204
2011-12-30 09:45:14	-52.5711	-43.7693	15.2144	120.842	8.30501	33.8697	4.89716	9.22986
2011-12-30 09:46:15	-52.5714	-43.7638	15.2437	120.958	8.34873	33.8693	4.8714	9.22768
2011-12-30 09:47:15	-52.5717	-43.7583	15.2504	121.085	8.3954	33.8704	4.89	9.22549
2011-12-30 09:48:15	-52.5721	-43.7527	15.2731	121.219	8.44545	33.8707	4.88	9.22328
2011-12-30 09:49:16	-52.5724	-43.747	15.3026	121.354	8.496	33.8728	4.85641	9.22108
2011-12-30 09:50:16	-52.5727	-43.7413	15.3081	121.485	8.54536	33.8711	4.88251	9.21894
2011-12-30 09:51:17	-52.5731	-43.7358	15.3176	121.628	8.59518	33.872	4.88844	9.21663
2011-12-30 09:52:17	-52.5735	-43.7302	15.3454	121.773	8.64961	33.8722	4.87256	9.21433
2011-12-30 09:53:18	-52.5739	-43.7246	15.351	121.932	8.7084	33.8717	4.89993	9.21208
2011-12-30 09:54:18	-52.5743	-43.719	15.3818	122.105	8.7754	33.8735	4.89	9.20983
2011-12-30 09:55:18	-52.5747	-43.7134	15.3721	122.321	8.85129	33.8731	4.94349	9.20752
2011-12-30 09:56:19	-52.5751	-43.7079	15.3918	122.543	8.93609	33.8724	4.96259	9.20524
2011-12-30 09:57:19	-52.5755	-43.7024	15.402	122.748	9.01221	33.8735	4.99	9.20295
2011-12-30 09:58:20	-52.576	-43.6967	15.4272	122.954	9.08897	33.8732	4.99	9.20063
2011-12-30 09:59:20	-52.5764	-43.6912	15.4461	123.121	9.14966	33.8751	4.99	9.19833
2011-12-30 10:00:20	-52.5768	-43.6855	15.4555	123.271	9.20355	33.8751	5.00408	9.19606
2011-12-30 10:01:21	-52.5772	-43.68	15.474	123.418	9.25737	33.8743	5.00365	9.19378
2011-12-30 10:02:21	-52.5776	-43.6744	15.4661	123.54	9.29987	33.8759	5.04519	9.19148
2011-12-30 10:03:22	-52.578	-43.6688	15.4732	123.61	9.32412	33.8725	5.05	9.18943
2011-12-30 10:04:22	-52.5784	-43.6632	15.4754	123.642	9.33205	33.8738	5.05	9.18747
2011-12-30 10:05:22	-52.5788	-43.6576	15.4861	123.647	9.33043	33.8734	5.03002	9.18554
2011-12-30 10:06:23	-52.5793	-43.652	15.483	123.647	9.32828	33.877	5.0414	9.18361
2011-12-30 10:07:23	-52.5796	-43.6463	15.4556	123.67	9.3298	33.8764	5.08842	9.18178
2011-12-30 10:08:24	-52.5799	-43.6408	15.4769	123.694	9.33915	33.8774	5.06247	9.17995
2011-12-30 10:09:24	-52.5802	-43.6353	15.4729	123.743	9.35318	33.8767	5.07676	9.17806
2011-12-30 10:10:25	-52.5806	-43.6298	15.4765	123.811	9.37731	33.8768	5.09	9.1762
2011-12-30 10:11:25	-52.5809	-43.6242	15.4835	123.893	9.4055	33.8762	5.09493	9.17435
2011-12-30 10:12:25	-52.5812	-43.6187	15.4629	124.019	9.44746	33.8759	5.15413	9.1724
2011-12-30 10:13:26	-52.5815	-43.6132	15.4914	124.163	9.50044	33.8769	5.1333	9.17044
2011-12-30 10:14:26	-52.5819	-43.6078	15.5263	124.307	9.55638	33.8758	5.11	9.16844
2011-12-30 10:15:27	-52.5823	-43.6024	15.5366	124.439	9.60364	33.8764	5.12	9.16643
2011-12-30 10:16:27	-52.5827	-43.5968	15.5438	124.556	9.64423	33.8789	5.13	9.16443
2011-12-30 10:17:28	-52.583	-43.5912	NaN	NaN	NaN	33.8757	5.15	9.16197
2011-12-30 10:18:28	-52.5834	-43.5856	15.5709	124.76	9.71583	33.8765	5.13111	9.15939
2011-12-30 10:19:29	-52.5838	-43.58	15.5896	124.87	9.75394	33.8769	5.12207	9.15677
2011-12-30 10:20:29	-52.5841	-43.5743	15.5915	124.99	9.79285	33.8767	5.13713	9.15427
2011-12-30 10:21:29	-52.5844	-43.5688	15.6017	125.103	9.83343	33.8764	5.15	9.15172
2011-12-30 10:22:30	-52.5848	-43.5631	15.6149	125.184	9.86043	33.8789	5.14537	9.1491
2011-12-30 10:23:30	-52.5852	-43.5575	15.6357	125.271	9.89074	33.8774	5.13	9.1465
2011-12-30 10:24:31	-52.5856	-43.5518	15.6396	125.327	9.90551	33.8794	5.13	9.14392
2011-12-30 10:25:31	-52.5859	-43.5461	15.6367	125.354	9.91149	33.8774	5.1446	9.14135
2011-12-30 10:26:32	-52.5864	-43.5404	15.6538	125.383	9.91866	33.8775	5.12174	9.13872
2011-12-30 10:27:32	-52.5868	-43.5347	15.681	125.412	9.92668	33.8778	5.08095	9.13612
2011-12-30 10:28:32	-52.5871	-43.529	15.6996	125.455	9.9398	33.8781	5.06	9.13355
2011-12-30 10:29:33	-52.5875	-43.5233	15.7516	125.518	9.96126	33.8787	4.9808	9.13099
2011-12-30 10:30:33	-52.5878	-43.5177	15.7666	125.605	9.99245	33.8803	4.98	9.12843
2011-12-30 10:31:34	-52.5882	-43.5121	15.7925	125.697	10.0257	33.8801	4.96	9.12586
2011-12-30 10:32:34	-52.5884	-43.5065	15.8428	125.792	10.059	33.8793	4.89	9.12335
2011-12-30 10:33:35	-52.5888	-43.5007	15.876	125.89	10.0937	33.8787	4.85446	9.12083
2011-12-30 10:34:35	-52.5891	-43.4952	15.8866	125.973	10.1225	33.8782	4.85941	9.11827
2011-12-30 10:35:36	-52.5894	-43.4897	15.92	126.035	10.1434	33.8789	4.81626	9.1157
2011-12-30 10:36:36	-52.5898	-43.4839	15.9784	126.09	10.1636	33.8766	4.73	9.11317
2011-12-30 10:37:37	-52.5901	-43.4781	16.0642	126.129	10.1795	33.8755	4.59397	9.11063
2011-12-30 10:38:37	-52.5904	-43.4722	16.151	126.14	10.1885	33.8754	4.4622	9.1081
2011-12-30 10:39:37	-52.5908	-43.4665	16.1959	126.122	10.1816	33.8798	4.38959	9.10549
2011-12-30 10:40:38	-52.5912	-43.4608	16.1357	126.1	10.1616	33.8875	4.48	9.1029
2011-12-30 10:41:38	-52.5916	-43.4551	16.1044	126.04	10.1281	33.8847	4.51	9.1003
2011-12-30 10:42:39	-52.592	-43.4494	16.065	125.897	10.0668	33.8803	4.55	9.09767
2011-12-30 10:43:39	-52.5924	-43.4436	16.0131	125.636	9.95742	33.8802	4.57687	9.09507
2011-12-30 10:44:40	-52.5928	-43.4379	16.0017	125.295	9.82292	33.8793	4.52596	9.09245
2011-12-30 10:45:40	-52.5932	-43.4323	15.9859	124.938	9.68123	33.8815	4.47497	9.08985
2011-12-30 10:46:40	-52.5936	-43.4265	15.9948	124.656	9.57122	33.8818	4.40415	9.08724
2011-12-30 10:47:41	-52.594	-43.4207	16.0136	124.477	9.49967	33.8796	4.33371	9.08464
2011-12-30 10:48:41	-52.5944	-43.4149	15.8009	122.724	8.81438	33.8768	4.30766	9.08209
2011-12-30 12:15:12	-52.6267	-42.9285	14.691	109.538	3.64036	33.7891	3.26142	8.97206
2011-12-30 12:16:12	-52.627	-42.9229	14.7046	109.603	3.67058	33.7875	3.25866	8.97813
2011-12-30 12:17:13	-52.6272	-42.9174	14.6905	109.665	3.69712	33.7854	3.29	8.98419
2011-12-30 12:18:13	-52.6275	-42.912	14.6839	109.732	3.727	33.7797	3.31868	8.99026
2011-12-30 12:19:14	-52.6278	-42.9064	14.6884	109.812	3.7618	33.7772	3.32779	8.99635
2011-12-30 12:20:14	-52.6281	-42.9008	14.6854	109.891	3.7976	33.7695	3.36	9.00242
2011-12-30 12:21:14	-52.6284	-42.8952	14.7031	109.937	3.81981	33.7643	3.33608	9.00849
2011-12-30 12:22:15	-52.6287	-42.8897	14.6843	109.96	3.83273	33.7582	3.3751	9.01457
2011-12-30 12:23:15	-52.629	-42.8841	14.6903	109.923	3.82398	33.7545	3.36	9.02008
2011-12-30 12:24:16	-52.6293	-42.8786	14.6783	109.842	3.79679	33.7505	3.36348	9.02506
2011-12-30 12:25:16	-52.6296	-42.8731	14.6649	109.758	3.7671	33.7492	3.36	9.02983
2011-12-30 12:26:17	-52.6299	-42.8675	14.6433	109.639	3.72556	33.7453	3.37613	9.03527
2011-12-30 12:27:17	-52.6301	-42.8619	14.6454	109.502	3.67888	33.7346	3.34322	9.04173
2011-12-30 12:28:17	-52.6304	-42.8563	14.642	109.4	3.64427	33.7394	3.32229	9.04819
2011-12-30 12:29:18	-52.6307	-42.8508	14.6247	109.317	3.61589	33.742	3.32899	9.05465
2011-12-30 12:30:18	-52.631	-42.8452	14.6269	109.22	3.58418	33.7411	3.30748	9.06111
2011-12-30 12:31:19	-52.6313	-42.8396	14.6623	109.16	3.56795	33.739	3.23558	9.06758
2011-12-30 12:32:19	-52.6316	-42.8339	14.6796	109.125	3.55923	33.7364	3.19308	9.07406
2011-12-30 12:33:19	-52.6318	-42.8284	14.6677	109.088	3.54874	33.7375	3.2	9.08051
2011-12-30 12:34:20	-52.6318	-42.824	14.6721	109.091	3.55489	33.7393	3.19489	9.08676
2011-12-30 12:35:20	-52.6329	-42.8221	14.6796	109.097	3.5613	33.7351	3.18118	9.09262
2011-12-30 12:36:21	-52.6339	-42.8222	14.6887	109.105	3.56888	33.7345	3.16651	9.09812
2011-12-30 12:37:21	-52.6343	-42.8226	14.6926	109.181	3.60282	33.7328	3.18245	9.10354
2011-12-30 12:38:22	-52.6345	-42.8227	14.7123	109.314	3.65968	33.7372	3.18157	9.109
2011-12-30 12:39:22	-52.6347	-42.8226	14.7127	109.401	3.69703	33.7407	3.19821	9.11446
2011-12-30 12:40:22	-52.6347	-42.8226	14.7345	109.45	3.72069	33.7357	3.17	9.11991
2011-12-30 12:41:23	-52.6347	-42.8226	14.7494	109.545	3.76282	33.7359	3.16919	9.12536
2011-12-30 12:42:23	-52.6347	-42.8226	14.7655	109.678	3.81932	33.7397	3.17153	9.13081
2011-12-30 12:43:24	-52.6347	-42.8226	14.7684	109.785	3.86553	33.7427	3.19245	9.13626
2011-12-30 12:44:24	-52.6347	-42.8226	14.7766	109.864	3.90083	33.7391	3.19635	9.1417
2011-12-30 12:45:25	-52.6347	-42.8226	14.7877	109.918	3.92618	33.7418	3.18589	9.14717
2011-12-30 12:46:25	-52.6347	-42.8226	14.7684	109.881	3.91601	33.742	3.21496	9.15261
2011-12-30 12:47:25	-52.6347	-42.8226	14.7767	109.789	3.88452	33.741	3.18	9.15808
2011-12-30 12:48:26	-52.6347	-42.8226	14.7575	109.672	3.84208	33.7424	3.18392	9.16353
2011-12-30 12:49:26	-52.6347	-42.8226	14.7395	109.445	3.75708	33.741	3.16657	9.16898
2011-12-30 12:50:27	-52.6347	-42.8226	14.6841	109.14	3.6396	33.7413	3.19288	9.17443
2011-12-30 12:51:27	-52.6347	-42.8226	14.6319	108.812	3.51142	33.741	3.19928	9.17989
2011-12-30 12:52:28	-52.6347	-42.8226	14.6008	108.48	3.383	33.7419	3.1712	9.18534
2011-12-30 12:53:28	-52.6347	-42.8226	14.551	108.173	3.26387	33.7413	3.18858	9.1908
2011-12-30 12:54:29	-52.6347	-42.8226	14.5353	107.914	3.1655	33.7403	3.16352	9.19625
2011-12-30 12:55:29	-52.6347	-42.8226	14.4795	107.695	3.08039	33.7429	3.20652	9.2017
2011-12-30 12:56:30	-52.6347	-42.8226	14.4817	107.507	3.00907	33.7417	3.15581	9.20716
2011-12-30 12:57:30	-52.6347	-42.8226	14.4316	107.364	2.95375	33.7418	3.20968	9.21261
2011-12-30 12:58:30	-52.6347	-42.8226	14.4206	107.223	2.90028	33.7416	3.19	9.21806
2011-12-30 12:59:31	-52.6347	-42.8226	14.4305	107.142	2.87217	33.7401	3.16	9.2235
2011-12-30 13:00:31	-52.6347	-42.8226	14.4138	107.091	2.85382	33.7417	3.17259	9.22896
2011-12-30 13:01:32	-52.6347	-42.8226	14.3995	107.012	2.82494	33.7417	3.17825	9.2344
2011-12-30 13:02:32	-52.6347	-42.8226	14.3966	106.959	2.80709	33.7417	3.17087	9.23985
2011-12-30 13:03:32	-52.6347	-42.8226	14.3692	106.93	2.79831	33.7388	3.22	9.2453
2011-12-30 13:04:33	-52.6347	-42.8226	14.3777	106.882	2.78205	33.7399	3.19085	9.25075
2011-12-30 13:05:33	-52.6347	-42.8226	14.3799	106.853	2.77316	33.7414	3.17318	9.2562
2011-12-30 13:06:34	-52.6347	-42.8226	14.3688	106.858	2.77812	33.7381	3.19751	9.26165
2011-12-30 13:07:34	-52.6347	-42.8226	14.3863	106.867	2.78555	33.7392	3.17325	9.2671
2011-12-30 13:08:35	-52.6347	-42.8226	14.3644	106.88	2.79261	33.7416	3.2084	9.27256
2011-12-30 13:09:35	-52.6347	-42.8226	14.3726	106.889	2.80011	33.743	3.2	9.278
2011-12-30 13:10:36	-52.6347	-42.8226	14.3924	106.919	2.81621	33.7372	3.17601	9.28346
2011-12-30 13:11:36	-52.6347	-42.8226	14.3774	106.974	2.84044	33.7392	3.21307	9.2889
2011-12-30 13:12:36	-52.6347	-42.8226	14.3827	106.992	2.851	33.7412	3.20597	9.29436
2011-12-30 13:13:37	-52.6347	-42.8227	14.3914	106.996	2.85669	33.7417	3.19723	9.2998
2011-12-30 13:14:37	-52.6347	-42.8226	14.4095	106.997	2.86066	33.7408	3.16499	9.30526
2011-12-30 13:15:38	-52.6347	-42.8227	14.3908	106.966	2.85045	33.7399	3.18945	9.3107
2011-12-30 13:16:38	-52.6347	-42.8226	14.397	106.923	2.83607	33.7393	3.16433	9.31616
2011-12-30 13:17:39	-52.6347	-42.8226	14.3925	106.873	2.81929	33.7395	3.16797	9.32161
2011-12-30 13:18:39	-52.6347	-42.8226	14.3816	106.802	2.79285	33.7414	3.16703	9.32707
2011-12-30 13:19:39	-52.6347	-42.8226	14.349	106.735	2.76773	33.7405	3.21036	9.33252
2011-12-30 13:20:40	-52.6347	-42.8226	14.3488	106.661	2.74058	33.7414	3.19216	9.33796
2011-12-30 13:21:40	-52.6347	-42.8226	14.3427	106.612	2.72345	33.7417	3.19082	9.34342
2011-12-30 13:22:41	-52.6347	-42.8226	14.3413	106.577	2.71178	33.742	3.18362	9.34887
2011-12-30 13:23:41	-52.6347	-42.8227	14.3406	106.523	2.69328	33.7384	3.17721	9.35432
2011-12-30 13:24:42	-52.6347	-42.8226	14.3143	106.467	2.672	33.74	3.20641	9.35978
2011-12-30 13:25:42	-52.6347	-42.8226	14.3397	106.419	2.65576	33.7414	3.14841	9.36524
2011-12-30 13:26:42	-52.6347	-42.8226	NaN	NaN	NaN	33.7416	3.20005	9.37068
2011-12-30 13:27:43	-52.6347	-42.8226	14.301	106.386	2.64694	33.7414	3.20742	9.37613
2011-12-30 13:28:43	-52.6347	-42.8226	14.3207	106.348	2.63512	33.7394	3.17	9.38158
2011-12-30 13:29:44	-52.6347	-42.8226	14.3036	106.303	2.61918	33.7412	3.19042	9.38704
2011-12-30 13:30:44	-52.6347	-42.8226	14.306	106.259	2.60411	33.7419	3.17665	9.39249
2011-12-30 13:31:45	-52.6347	-42.8226	14.3093	106.234	2.59648	33.7409	3.16311	9.39794
2011-12-30 13:32:45	-52.6347	-42.8226	14.3052	106.215	2.59129	33.7436	3.16466	9.40339
2011-12-30 13:33:45	-52.6347	-42.8226	14.32	106.19	2.58403	33.7417	3.13401	9.40884
2011-12-30 13:34:46	-52.6347	-42.8226	14.3125	106.185	2.58494	33.7422	3.14845	9.4143
2011-12-30 13:35:46	-52.6347	-42.8227	14.3144	106.169	2.58109	33.7404	3.14139	9.41974
2011-12-30 13:36:47	-52.6347	-42.8227	14.2954	106.155	2.57797	33.7397	3.17624	9.4252
2011-12-30 13:37:47	-52.6347	-42.8227	14.3052	106.164	2.58458	33.7411	3.15957	9.43065
2011-12-30 13:38:48	-52.6347	-42.8226	14.2809	106.174	2.59045	33.7422	3.2	9.4361
2011-12-30 13:39:48	-52.6347	-42.8226	14.3068	106.167	2.59074	33.7415	3.15	9.44155
2011-12-30 13:40:49	-52.6347	-42.8226	14.3109	106.177	2.59795	33.7417	3.14559	9.44701
2011-12-30 13:41:49	-52.6347	-42.8226	14.3011	106.17	2.59811	33.7435	3.1668	9.45246
2011-12-30 13:42:50	-52.6347	-42.8226	14.2949	106.179	2.60427	33.7413	3.17792	9.45792
2011-12-30 13:43:50	-52.6347	-42.8226	14.2944	106.197	2.61471	33.7407	3.18467	9.46337
2011-12-30 13:44:50	-52.6347	-42.8225	14.3158	106.181	2.61124	33.7414	3.14213	9.46884
2011-12-30 13:45:51	-52.6347	-42.8223	14.2813	106.173	2.60957	33.7409	3.2	9.47432
2011-12-30 13:46:51	-52.6347	-42.8222	14.2781	106.195	2.62205	33.7411	3.21486	9.47979
2011-12-30 13:47:52	-52.6347	-42.822	14.3023	106.222	2.63647	33.7403	3.17429	9.48527
2011-12-30 13:48:52	-52.6347	-42.8219	14.3001	106.239	2.64603	33.7418	3.18	9.49074
2011-12-30 13:49:52	-52.6347	-42.8217	14.2993	106.22	2.64143	33.7408	3.18057	9.49622
2011-12-30 13:50:53	-52.6347	-42.8216	14.3016	106.217	2.6423	33.7367	3.17059	9.50169
2011-12-30 13:51:53	-52.6347	-42.8215	14.3094	106.228	2.65	33.7401	3.15866	9.50716
2011-12-30 13:52:54	-52.6347	-42.8214	14.3192	106.23	2.65471	33.7392	3.15	9.51263
2011-12-30 13:53:54	-52.6347	-42.8212	14.3068	106.235	2.65992	33.7416	3.17703	9.51811
2011-12-30 13:54:54	-52.6347	-42.8211	14.3074	106.216	2.65425	33.7411	3.16846	9.52358
2011-12-30 13:55:55	-52.6347	-42.821	14.3009	106.202	2.65088	33.7384	3.1748	9.52906
2011-12-30 13:56:55	-52.6347	-42.8208	14.3064	106.192	2.65019	33.7394	3.16741	9.53454
2011-12-30 13:57:56	-52.6347	-42.8207	14.3065	106.179	2.64723	33.7407	3.16	9.54002
2011-12-30 13:58:56	-52.6347	-42.8205	14.3092	106.187	2.65336	33.7404	3.15741	9.54549
2011-12-30 13:59:57	-52.6347	-42.8205	14.305	106.183	2.65461	33.7408	3.16672	9.55094
2011-12-30 14:00:57	-52.6347	-42.8205	14.2788	106.169	2.65042	33.7393	3.20595	9.55641
2011-12-30 14:01:58	-52.6347	-42.8204	14.2783	106.133	2.63779	33.7395	3.19957	9.56186
2011-12-30 14:02:58	-52.6347	-42.8204	14.273	106.122	2.63545	33.7389	3.20175	9.56733
2011-12-30 14:03:58	-52.6347	-42.8204	14.2916	106.132	2.64311	33.7408	3.17185	9.57278
2011-12-30 14:04:59	-52.6347	-42.8203	14.3004	106.124	2.64329	33.7412	3.15713	9.57824
2011-12-30 14:05:59	-52.6347	-42.8203	14.29	106.14	2.65212	33.7402	3.17587	9.58369
2011-12-30 14:07:00	-52.6347	-42.8204	14.314	106.17	2.66849	33.7414	3.14134	9.58913
2011-12-30 14:08:00	-52.6347	-42.8203	14.3007	106.165	2.66919	33.7393	3.1649	9.59459
2011-12-30 14:09:00	-52.6347	-42.8203	14.2972	106.147	2.6638	33.74	3.16601	9.60004
2011-12-30 14:10:01	-52.6347	-42.8203	14.255	106.147	2.66534	33.7396	3.24106	9.60548
2011-12-30 14:11:01	-52.6347	-42.8203	14.2927	106.132	2.66319	33.741	3.17525	9.61093
2011-12-30 14:12:02	-52.6347	-42.8203	14.2223	106.122	2.65929	33.7388	3.2925	9.61639
2011-12-30 14:13:02	-52.6347	-42.8203	14.2697	106.114	2.65941	33.7417	3.2	9.62183
2011-12-30 14:14:03	-52.6347	-42.8203	14.2835	106.107	2.66038	33.7369	3.18	9.62728
2011-12-30 14:15:03	-52.6347	-42.8203	14.2812	106.091	2.65581	33.7367	3.17916	9.63273
2011-12-30 14:16:03	-52.6347	-42.8203	14.2643	106.113	2.6686	33.7393	3.22135	9.63818
2011-12-30 14:17:04	-52.6347	-42.8203	14.2796	106.107	2.6685	33.7396	3.1874	9.64363
2011-12-30 14:18:04	-52.6347	-42.8203	14.275	106.085	2.66165	33.7411	3.1906	9.64909
2011-12-30 14:19:05	-52.6347	-42.8203	14.2838	106.065	2.65611	33.7403	3.16878	9.65454
2011-12-30 14:20:05	-52.6347	-42.8204	14.2832	106.062	2.6575	33.7401	3.17	9.65998
2011-12-30 14:21:05	-52.6347	-42.8203	14.2626	106.079	2.66702	33.7402	3.21	9.66543
2011-12-30 14:22:06	-52.6347	-42.8203	14.2852	106.081	2.67098	33.7396	3.16653	9.67088
2011-12-30 14:23:06	-52.6347	-42.8203	14.2774	106.08	2.67347	33.7385	3.18	9.67634
2011-12-30 14:24:07	-52.6347	-42.8203	14.2577	106.082	2.67618	33.7397	3.21566	9.6818
2011-12-30 14:25:07	-52.6347	-42.8203	14.2723	106.095	2.68525	33.7406	3.19117	9.68725
2011-12-30 14:26:08	-52.6347	-42.8203	14.2697	106.093	2.68726	33.7398	3.2	9.6927
2011-12-30 14:27:08	-52.6347	-42.8203	14.2708	106.07	2.68063	33.7401	3.19518	9.69815
2011-12-30 14:28:09	-52.6347	-42.8203	14.258	106.087	2.69033	33.7378	3.22	9.7036
2011-12-30 14:29:09	-52.6347	-42.8203	14.2735	106.103	2.70016	33.7405	3.19297	9.70905
2011-12-30 14:30:09	-52.6347	-42.8203	14.2589	106.1	2.70147	33.7404	3.22	9.71451
2011-12-30 14:31:10	-52.6347	-42.8203	14.2785	106.1	2.70505	33.7381	3.18522	9.71996
2011-12-30 14:32:10	-52.6347	-42.8203	14.277	106.096	2.70567	33.7398	3.18565	9.72541
2011-12-30 14:33:11	-52.6347	-42.8203	14.2726	106.109	2.71379	33.74	3.19355	9.73086
2011-12-30 14:34:11	-52.6347	-42.8203	14.2942	106.111	2.71891	33.7386	3.16116	9.7363
2011-12-30 14:35:11	-52.6347	-42.8203	14.2638	106.109	2.71993	33.7403	3.21606	9.74175
2011-12-30 14:36:12	-52.6347	-42.8203	14.2484	106.098	2.71753	33.7375	3.24	9.74721
2011-12-30 14:37:12	-52.6347	-42.8202	14.2573	106.096	2.71917	33.7417	3.22	9.75269
2011-12-30 14:38:13	-52.6347	-42.8202	14.2501	106.124	2.73416	33.7383	3.24	9.75813
2011-12-30 14:39:13	-52.6347	-42.8202	14.2692	106.129	2.74017	33.7396	3.20847	9.76358
2011-12-30 14:40:14	-52.6347	-42.8202	14.2684	106.13	2.74293	33.739	3.20709	9.76903
2011-12-30 14:41:14	-52.6347	-42.8202	14.2811	106.157	2.75862	33.7411	3.19308	9.77448
2011-12-30 14:42:15	-52.6347	-42.8202	14.2795	106.191	2.7765	33.7379	3.20309	9.77993
2011-12-30 14:43:15	-52.6347	-42.8202	14.2915	106.215	2.79013	33.7396	3.18432	9.7854
2011-12-30 14:44:16	-52.6347	-42.8202	14.2876	106.238	2.8032	33.7388	3.2	9.79085
2011-12-30 14:45:16	-52.6347	-42.8202	14.256	106.275	2.82163	33.7399	3.26316	9.79631
2011-12-30 14:46:17	-52.6347	-42.8202	14.2714	106.283	2.82868	33.7386	3.24015	9.80176
2011-12-30 14:47:17	-52.6347	-42.8202	14.291	106.3	2.83981	33.7404	3.20886	9.80721
2011-12-30 14:48:17	-52.6347	-42.8202	14.3003	106.333	2.8589	33.7405	3.21016	9.81266
2011-12-30 14:49:18	-52.6347	-42.8202	14.2967	106.348	2.86775	33.7397	3.21251	9.81812
2011-12-30 14:50:18	-52.6347	-42.8202	14.311	106.371	2.88113	33.7403	3.19167	9.82358
2011-12-30 14:51:19	-52.6347	-42.8202	14.3219	106.406	2.90073	33.7417	3.18471	9.82903
2011-12-30 14:52:19	-52.6347	-42.8202	14.333	106.441	2.91983	33.7409	3.17345	9.83449
2011-12-30 14:53:20	-52.6347	-42.8202	14.3251	106.475	2.93779	33.7394	3.1944	9.83994
2011-12-30 14:54:20	-52.6347	-42.8202	14.3366	106.474	2.94102	33.741	3.17479	9.84539
2011-12-30 14:55:21	-52.6347	-42.8203	14.3378	106.487	2.9501	33.7392	3.18	9.85083
2011-12-30 14:56:21	-52.6347	-42.8202	14.3358	106.512	2.96342	33.7422	3.18	9.85629
2011-12-30 14:57:21	-52.6347	-42.8202	14.336	106.548	2.98242	33.7424	3.18431	9.86174
2011-12-30 14:58:22	-52.6347	-42.8202	14.3173	106.579	2.9987	33.742	3.22458	9.8672
2011-12-30 14:59:22	-52.6347	-42.8202	14.3462	106.591	3.00881	33.7399	3.1791	9.87266
2011-12-30 15:00:23	-52.6347	-42.8202	14.3499	106.604	3.018	33.7411	3.18	9.87811
2011-12-30 15:01:23	-52.6347	-42.8202	14.3291	106.609	3.02274	33.7428	3.21836	9.88357
2011-12-30 15:02:24	-52.6347	-42.8202	NaN	NaN	NaN	33.7415	3.2	9.88902
2011-12-30 15:03:24	-52.6347	-42.8202	14.3314	106.636	3.04139	33.7408	3.22	9.89448
2011-12-30 15:04:25	-52.6347	-42.8202	14.3647	106.647	3.05063	33.7407	3.16384	9.89993
2011-12-30 15:05:25	-52.6347	-42.8202	14.3299	106.664	3.06047	33.742	3.23125	9.90539
2011-12-30 15:06:26	-52.6347	-42.8202	14.3499	106.667	3.06547	33.7407	3.19424	9.91084
2011-12-30 15:07:26	-52.6347	-42.8202	14.372	106.681	3.07536	33.743	3.15479	9.9163
2011-12-30 15:08:27	-52.6347	-42.8202	14.3436	106.69	3.08161	33.7406	3.20733	9.92175
2011-12-30 15:09:27	-52.6347	-42.8202	14.3665	106.71	3.09593	33.7431	3.18252	9.9272
2011-12-30 15:10:28	-52.6347	-42.8202	14.3585	106.731	3.10814	33.742	3.20015	9.93265
2011-12-30 15:11:28	-52.6347	-42.8202	14.3574	106.748	3.11892	33.7398	3.20172	9.9381
2011-12-30 15:12:28	-52.6347	-42.8202	14.3517	106.765	3.12936	33.742	3.21634	9.94355
2011-12-30 15:13:29	-52.6347	-42.8202	14.3623	106.758	3.12896	33.7408	3.18798	9.94901
2011-12-30 15:14:29	-52.6346	-42.8202	14.3553	106.788	3.14628	33.7415	3.2137	9.95446
2011-12-30 15:15:30	-52.6347	-42.8202	14.3559	106.797	3.15388	33.74	3.21453	9.95992
2011-12-30 15:16:30	-52.6347	-42.8202	14.388	106.784	3.1522	33.7406	3.15352	9.96537
2011-12-30 15:17:31	-52.6347	-42.8206	14.3555	106.8	3.16186	33.7417	3.21643	9.97075
2011-12-30 15:18:31	-52.6346	-42.8217	14.3918	106.809	3.16992	33.7424	3.15334	9.97602
2011-12-30 15:19:32	-52.6346	-42.8227	14.3591	106.802	3.16922	33.7406	3.21323	9.9813
2011-12-30 15:20:32	-52.6347	-42.8236	14.3722	106.794	3.16931	33.7441	3.18973	9.98659
2011-12-30 15:21:33	-52.6346	-42.8244	14.3759	106.807	3.17789	33.7406	3.18078	9.99189
2011-12-30 15:22:33	-52.6346	-42.8254	14.3502	106.816	3.18477	33.7401	3.23293	9.99717
2011-12-30 15:23:33	-52.6347	-42.8263	14.3528	106.806	3.18384	33.7371	3.22778	10.0025
2011-12-30 15:24:34	-52.6346	-42.8272	14.318	106.808	3.18581	33.7368	3.28436	10.0078
2011-12-30 15:25:34	-52.6347	-42.8282	14.3318	106.823	3.19645	33.7375	3.265	10.013
2011-12-30 15:26:35	-52.6347	-42.8291	14.3225	106.82	3.19813	33.7354	3.28	10.0183
2011-12-30 15:27:35	-52.6347	-42.83	14.3311	106.793	3.18902	33.7365	3.26	10.0236
2011-12-30 15:28:36	-52.6347	-42.8309	14.3121	106.785	3.18784	33.7355	3.29265	10.0289
2011-12-30 15:29:36	-52.6346	-42.8319	14.2932	106.768	3.18161	33.7369	3.31456	10.0342
2011-12-30 15:30:37	-52.6347	-42.8328	14.3082	106.75	3.1766	33.7351	3.28184	10.0395
2011-12-30 15:31:37	-52.6346	-42.8336	14.2865	106.746	3.17757	33.7353	3.32209	10.0448
2011-12-30 15:32:37	-52.6347	-42.8346	14.3074	106.739	3.17898	33.7338	3.29	10.0501
2011-12-30 15:33:38	-52.6346	-42.8355	14.2881	106.744	3.18317	33.7357	3.32	10.0554
2011-12-30 15:34:38	-52.6346	-42.8364	14.2944	106.753	3.19007	33.7373	3.30692	10.0606
2011-12-30 15:35:39	-52.6346	-42.8374	14.2939	106.758	3.19604	33.7348	3.31288	10.0659
2011-12-30 15:36:22	-52.6346	-42.838	14.3018	106.751	3.19569	33.7386	3.30047	10.0697
2011-12-30 15:42:56	-52.6347	-42.844	14.2995	106.818	3.24675	33.7379	3.31248	10.1042
2011-12-30 15:43:41	-52.6346	-42.8447	14.2977	106.817	3.24906	33.7363	3.32	10.1081
2011-12-30 15:44:42	-52.6346	-42.8456	14.2951	106.834	3.26019	33.7362	3.32822	10.1134
2011-12-30 15:45:42	-52.6346	-42.8465	14.3014	106.854	3.27292	33.7369	3.32186	10.1187
2011-12-30 15:46:43	-52.6346	-42.8474	14.3109	106.861	3.28023	33.7361	3.31	10.124
2011-12-30 15:47:43	-52.6346	-42.8484	14.307	106.882	3.29245	33.7381	3.31277	10.1293
2011-12-30 15:48:43	-52.6346	-42.8492	14.3139	106.918	3.31312	33.7396	3.31	10.1346
2011-12-30 15:49:44	-52.6346	-42.8502	14.3149	106.94	3.3269	33.738	3.31713	10.1399
2011-12-30 15:50:44	-52.6346	-42.8511	14.2983	106.936	3.32775	33.7399	3.3473	10.1452
2011-12-30 15:51:45	-52.6346	-42.8521	14.2966	106.925	3.32623	33.7377	3.35055	10.1504
2011-12-30 15:52:45	-52.6345	-42.8529	14.2785	106.932	3.33221	33.7373	3.38562	10.1557
2011-12-30 15:53:46	-52.6345	-42.8539	14.2867	106.921	3.33001	33.7384	3.36344	10.161
2011-12-30 15:54:46	-52.6345	-42.8548	14.3021	106.916	3.33119	33.7391	3.33051	10.1663
2011-12-30 15:55:47	-52.6345	-42.8557	14.2766	106.925	3.3385	33.7419	3.38524	10.1716
2011-12-30 15:56:47	-52.6345	-42.8566	14.2778	106.925	3.34116	33.7397	3.38	10.1769
2011-12-30 15:57:48	-52.6345	-42.8575	14.275	106.928	3.34636	33.7385	3.3902	10.1822
2011-12-30 15:58:48	-52.6345	-42.8585	14.2786	106.908	3.34042	33.7418	3.3822	10.1875
2011-12-30 15:59:49	-52.6345	-42.8594	14.2683	106.886	3.33222	33.7407	3.388	10.1928
2011-12-30 16:00:49	-52.6345	-42.8603	14.2453	106.855	3.31935	33.7408	3.42	10.1981
2011-12-30 16:01:49	-52.6345	-42.8611	14.2622	106.82	3.30602	33.7405	3.37619	10.2034
2011-12-30 16:02:50	-52.6345	-42.8621	14.2565	106.81	3.30436	33.7406	3.38486	10.2087
2011-12-30 16:03:50	-52.6345	-42.8631	14.2505	106.807	3.30594	33.7416	3.39757	10.2139
2011-12-30 16:04:51	-52.6345	-42.8643	14.2357	106.791	3.30096	33.741	3.42	10.2192
2011-12-30 16:05:51	-52.6345	-42.8653	14.243	106.767	3.29266	33.7434	3.39902	10.2245
2011-12-30 16:06:52	-52.6344	-42.8661	14.2501	106.779	3.3019	33.7418	3.38852	10.2299
2011-12-30 16:07:52	-52.6344	-42.8668	14.2567	106.789	3.31059	33.7413	3.38108	10.2356
2011-12-30 16:08:53	-52.6344	-42.8676	14.2442	106.796	3.31634	33.7405	3.3997	10.2412
2011-12-30 16:09:53	-52.6344	-42.8684	14.2579	106.825	3.33441	33.7426	3.38275	10.2468
2011-12-30 16:10:54	-52.6344	-42.8693	14.2451	106.85	3.34907	33.7436	3.4109	10.2524
2011-12-30 16:11:54	-52.6344	-42.8701	14.2643	106.871	3.36361	33.7445	3.38	10.2581
2011-12-30 16:12:55	-52.6344	-42.871	14.2363	106.888	3.37477	33.7427	3.44051	10.2637
2011-12-30 16:13:55	-52.6344	-42.8718	14.2759	106.898	3.38446	33.7432	3.36992	10.2693
2011-12-30 16:14:55	-52.6344	-42.8726	14.2723	106.914	3.39589	33.7449	3.38206	10.275
2011-12-30 16:15:56	-52.6344	-42.8734	14.2733	106.92	3.4018	33.7445	3.38	10.2806
2011-12-30 16:16:56	-52.6345	-42.8743	14.2681	106.955	3.4226	33.7431	3.4	10.2863
2011-12-30 16:17:57	-52.6345	-42.8752	14.2848	106.981	3.43998	33.7454	3.38	10.2919
2011-12-30 16:18:57	-52.6345	-42.876	14.2648	106.996	3.44853	33.7425	3.40803	10.2974
2011-12-30 16:19:57	-52.6345	-42.8769	14.2832	107.018	3.46333	33.7435	3.3801	10.303
2011-12-30 16:20:58	-52.6345	-42.8779	14.2795	107.046	3.47996	33.7445	3.39	10.3085
2011-12-30 16:21:58	-52.6345	-42.8788	14.269	107.042	3.48156	33.7451	3.4118	10.3141
2011-12-30 16:22:59	-52.6345	-42.8797	14.277	107.053	3.49092	33.744	3.4	10.3196
2011-12-30 16:23:59	-52.6345	-42.8807	14.2892	107.054	3.49571	33.7463	3.38	10.3252
2011-12-30 16:25:00	-52.6346	-42.8817	14.2697	107.044	3.49377	33.7456	3.41445	10.3308
2011-12-30 16:26:00	-52.6346	-42.8827	14.2803	107.06	3.50494	33.7459	3.39539	10.3363
2011-12-30 16:27:01	-52.6346	-42.8837	14.2629	107.087	3.52156	33.7455	3.43726	10.3419
2011-12-30 16:28:01	-52.6346	-42.8847	14.2856	107.072	3.51814	33.7468	3.39	10.3475
2011-12-30 16:29:02	-52.6347	-42.8857	14.276	107.062	3.51643	33.7472	3.40378	10.3531
2011-12-30 16:30:02	-52.6347	-42.8867	14.2583	107.091	3.53415	33.7492	3.44481	10.3586
2011-12-30 16:31:02	-52.6347	-42.8877	14.2731	107.104	3.5445	33.7464	3.42	10.3642
2011-12-30 16:32:03	-52.6348	-42.8886	14.2924	107.104	3.54813	33.7504	3.38154	10.3698
2011-12-30 16:33:03	-52.6348	-42.8895	14.278	107.09	3.54477	33.7492	3.40833	10.3754
2011-12-30 16:34:04	-52.6349	-42.8904	14.2702	107.073	3.53899	33.7489	3.41468	10.3809
2011-12-30 16:35:04	-52.6349	-42.8909	14.271	107.075	3.5442	33.7506	3.41647	10.3865
2011-12-30 16:36:05	-52.6349	-42.8913	14.2642	107.067	3.54272	33.7511	3.42095	10.392
2011-12-30 16:37:05	-52.635	-42.8915	14.2601	107.05	3.5372	33.7508	3.42	10.3975
2011-12-30 16:38:05	-52.6351	-42.8916	14.2619	107.03	3.53034	33.7515	3.41	10.403
2011-12-30 16:39:06	-52.6353	-42.8915	14.266	107.028	3.5344	33.7513	3.41331	10.4085
2011-12-30 16:40:06	-52.6355	-42.8912	14.2613	107.035	3.5413	33.752	3.42251	10.414
2011-12-30 16:41:07	-52.6357	-42.8909	14.2588	107.029	3.54087	33.753	3.42	10.4195
2011-12-30 16:42:07	-52.6361	-42.8908	14.2573	107.027	3.54294	33.7509	3.41906	10.4251
2011-12-30 16:43:07	-52.6365	-42.8911	14.2691	107.032	3.54998	33.7492	3.40026	10.4308
2011-12-30 16:44:08	-52.6367	-42.8918	14.2649	107.031	3.55314	33.7507	3.41	10.4364
2011-12-30 16:45:08	-52.6368	-42.8926	14.2642	107.033	3.55747	33.7488	3.41	10.442
2011-12-30 16:46:09	-52.6369	-42.8934	14.2608	107.041	3.56528	33.7502	3.42	10.4476
2011-12-30 16:47:09	-52.637	-42.8944	14.2571	107.025	3.56027	33.7488	3.42	10.4532
2011-12-30 16:48:09	-52.637	-42.8954	14.2618	107.03	3.56632	33.7503	3.41394	10.4588
2011-12-30 16:49:10	-52.637	-42.8964	14.2589	107.039	3.57416	33.7496	3.42	10.4643
2011-12-30 16:50:10	-52.637	-42.8973	14.2553	107.02	3.56799	33.7524	3.42	10.4699
2011-12-30 16:51:11	-52.6371	-42.8983	14.2583	107.035	3.57946	33.748	3.42	10.4754
2011-12-30 16:52:11	-52.6371	-42.8992	14.2605	107.06	3.59527	33.7515	3.41706	10.481
2011-12-30 16:53:11	-52.6372	-42.9	14.2615	107.074	3.6062	33.7539	3.42236	10.4866
2011-12-30 16:54:12	-52.6372	-42.9008	14.244	107.064	3.60398	33.7549	3.45	10.4921
2011-12-30 16:55:12	-52.6373	-42.9016	14.2652	107.036	3.59375	33.753	3.4016	10.4977
2011-12-30 16:56:13	-52.6373	-42.9025	14.2567	107.029	3.59388	33.7548	3.42006	10.5033
2011-12-30 16:57:13	-52.6374	-42.9034	14.253	107	3.58293	33.7575	3.42209	10.5089
2011-12-30 16:58:13	-52.6375	-42.9045	14.2487	106.956	3.56327	33.7549	3.41188	10.5145
2011-12-30 16:59:14	-52.6376	-42.9056	14.2433	106.914	3.54615	33.7549	3.41729	10.5201
2011-12-30 17:00:14	-52.6377	-42.9068	14.236	106.858	3.52058	33.7566	3.41336	10.5257
2011-12-30 17:01:15	-52.6378	-42.9079	14.2269	106.783	3.48542	33.7553	3.41147	10.5313
2011-12-30 17:02:15	-52.6379	-42.909	14.22	106.704	3.44847	33.7576	3.40467	10.5369
2011-12-30 17:03:16	-52.6379	-42.9102	14.1981	106.659	3.42783	33.7567	3.43234	10.5425
2011-12-30 17:04:16	-52.638	-42.9113	14.1933	106.591	3.3964	33.7566	3.42286	10.5482
2011-12-30 17:05:17	-52.638	-42.9123	14.1882	106.529	3.36799	33.7585	3.42	10.5537
2011-12-30 17:06:17	-52.6381	-42.9134	14.1839	106.495	3.35382	33.7582	3.41908	10.5593
2011-12-30 17:07:17	-52.6381	-42.9146	14.1766	106.431	3.32449	33.7598	3.42	10.5649
2011-12-30 17:08:18	-52.6382	-42.9159	14.1661	106.378	3.2993	33.7591	3.42	10.5705
2011-12-30 17:09:18	-52.6382	-42.9172	14.1583	106.343	3.28496	33.76	3.42834	10.5762
2011-12-30 17:10:19	-52.6383	-42.9184	14.1662	106.303	3.26801	33.7631	3.40543	10.5818
2011-12-30 17:11:19	-52.6384	-42.9196	14.1582	106.28	3.25886	33.7649	3.41368	10.5874
2011-12-30 17:12:20	-52.6385	-42.921	14.1444	106.247	3.24465	33.7647	3.43	10.5931
2011-12-30 17:13:20	-52.6386	-42.9224	14.1571	106.206	3.22721	33.7664	3.39557	10.5987
2011-12-30 17:14:21	-52.6386	-42.9237	14.1467	106.196	3.22459	33.7666	3.41	10.6043
2011-12-30 17:15:21	-52.6387	-42.925	14.1593	106.185	3.22238	33.7677	3.38	10.6099
2011-12-30 17:16:22	-52.6388	-42.9262	14.1468	106.169	3.21685	33.7658	3.40203	10.6156
2011-12-30 17:17:22	-52.6389	-42.9273	14.1586	106.149	3.21083	33.7678	3.37899	10.6212
2011-12-30 17:18:22	-52.6389	-42.9285	14.1586	106.147	3.21172	33.7686	3.37028	10.6268
2011-12-30 17:19:23	-52.639	-42.9296	14.1456	106.167	3.22533	33.7698	3.4	10.6324
2011-12-30 17:20:23	-52.6391	-42.9308	14.1385	106.179	3.23438	33.7685	3.41844	10.638
2011-12-30 17:21:24	-52.6391	-42.932	14.1393	106.177	3.23538	33.7701	3.40276	10.6436
2011-12-30 17:22:24	-52.6392	-42.9332	14.1507	106.173	3.23705	33.7728	3.38344	10.6492
2011-12-30 17:23:25	-52.6393	-42.9343	14.1458	106.175	3.24061	33.7731	3.39	10.6549
2011-12-30 17:24:25	-52.6393	-42.9355	14.1596	106.149	3.23111	33.7732	3.35918	10.6604
2011-12-30 17:25:26	-52.6394	-42.9367	14.1489	106.14	3.22957	33.7726	3.38	10.6661
2011-12-30 17:26:26	-52.6395	-42.9378	14.1679	106.17	3.24822	33.7741	3.34695	10.6717
2011-12-30 17:27:26	-52.6395	-42.9391	14.1498	106.16	3.24627	33.7745	3.38	10.6773
2011-12-30 17:28:27	-52.6396	-42.9404	14.1552	106.138	3.23831	33.7748	3.36834	10.6829
2011-12-30 17:29:27	-52.6397	-42.9415	14.1703	106.125	3.23557	33.7754	3.3407	10.6885
2011-12-30 17:30:28	-52.6397	-42.9425	14.1399	106.127	3.23683	33.7743	3.38	10.6941
2011-12-30 17:31:28	-52.6398	-42.9435	14.1484	106.128	3.24218	33.7785	3.37628	10.6997
2011-12-30 17:32:28	-52.6399	-42.9443	14.1444	106.125	3.24251	33.7738	3.37173	10.7053
2011-12-30 17:33:29	-52.64	-42.9451	14.1703	106.159	3.26568	33.7754	3.34541	10.7109
2011-12-30 17:34:29	-52.6401	-42.9458	14.1626	106.21	3.29441	33.7766	3.36356	10.7165
2011-12-30 17:35:30	-52.6403	-42.9465	14.1714	106.259	3.32379	33.7783	3.36	10.722
2011-12-30 17:36:30	-52.6404	-42.9471	14.1907	106.324	3.36206	33.7773	3.34	10.7276
2011-12-30 17:37:31	-52.6405	-42.9478	14.208	106.416	3.4148	33.7796	3.3327	10.7332
2011-12-30 17:38:31	-52.6406	-42.9484	14.2148	106.507	3.46583	33.7796	3.33742	10.7388
2011-12-30 17:39:32	-52.6407	-42.949	14.2234	106.589	3.51251	33.7795	3.34	10.7444
2011-12-30 17:40:32	-52.6409	-42.9497	14.2539	106.685	3.56826	33.7824	3.3109	10.75
2011-12-30 17:41:32	-52.6411	-42.9506	14.2489	106.77	3.6166	33.7821	3.34008	10.7556
2011-12-30 17:42:33	-52.6412	-42.9519	14.2707	106.897	3.68786	33.7834	3.32812	10.7613
2011-12-30 17:43:33	-52.6413	-42.9532	14.3	107.038	3.7674	33.7818	3.31	10.7669
2011-12-30 17:44:34	-52.6414	-42.9546	14.3152	107.15	3.83103	33.782	3.31	10.7725
2011-12-30 17:45:34	-52.6414	-42.956	14.3245	107.254	3.89093	33.7859	3.32	10.7781
2011-12-30 17:46:35	-52.6414	-42.9572	14.3442	107.347	3.94452	33.7875	3.30459	10.7837
2011-12-30 17:47:35	-52.6415	-42.9584	14.3474	107.422	3.98877	33.7864	3.32	10.7894
2011-12-30 17:48:36	-52.6417	-42.9597	14.3417	107.489	4.02806	33.7862	3.34643	10.795
2011-12-30 17:49:36	-52.6418	-42.9609	14.3568	107.55	4.06542	33.7884	3.33453	10.8007
2011-12-30 17:50:37	-52.6419	-42.9622	14.3809	107.612	4.10397	33.7862	3.31	10.8063
2011-12-30 17:51:37	-52.642	-42.9633	14.3809	107.694	4.15314	33.7888	3.33832	10.8119
2011-12-30 17:52:38	-52.642	-42.9643	14.3988	107.786	4.20595	33.788	3.32	10.8175
2011-12-30 17:53:38	-52.6421	-42.9652	14.3693	107.896	4.265	33.7887	3.38399	10.8231
2011-12-30 17:54:38	-52.6422	-42.9662	14.4102	107.999	4.32707	33.7893	3.34	10.8287
2011-12-30 17:55:39	-52.6424	-42.9672	14.4451	108.119	4.39771	33.7758	3.31141	10.8343
2011-12-30 17:56:39	-52.6425	-42.9682	14.4513	108.249	4.47136	33.7955	3.3262	10.84
2011-12-30 17:57:40	-52.6426	-42.9694	14.4912	108.375	4.54585	33.7939	3.29	10.8456
2011-12-30 17:58:40	-52.6427	-42.9706	14.4985	108.496	4.61637	33.7909	3.31	10.8512
2011-12-30 17:59:41	-52.6428	-42.9719	14.5118	108.598	4.67584	33.7924	3.31	10.8569
2011-12-30 18:00:41	-52.6428	-42.973	14.5424	108.681	4.72263	33.7914	3.27525	10.8574
2011-12-30 18:01:42	-52.6429	-42.9742	14.5471	108.75	4.7595	33.7891	3.29168	10.8556
2011-12-30 18:02:42	-52.6431	-42.9753	14.5442	108.768	4.76658	33.7904	3.29264	10.8538
2011-12-30 18:03:43	-52.6432	-42.9766	14.5257	108.713	4.73403	33.7888	3.31012	10.8521
2011-12-30 18:04:43	-52.6433	-42.9778	14.511	108.6	4.67114	33.7912	3.30887	10.8503
2011-12-30 18:05:43	-52.6434	-42.9791	14.4882	108.505	4.61717	33.7904	3.32197	10.8485
2011-12-30 18:06:44	-52.6435	-42.9805	14.4725	108.414	4.56706	33.7913	3.33299	10.8468
2011-12-30 18:07:44	-52.6436	-42.9818	14.46	108.331	4.51932	33.7911	3.33	10.845
2011-12-30 18:08:45	-52.6437	-42.9831	14.4441	108.254	4.47545	33.7913	3.33488	10.8432
2011-12-30 18:09:45	-52.6438	-42.9843	14.4094	108.149	4.41705	33.7875	3.38	10.8415
2011-12-30 18:10:46	-52.6439	-42.9855	14.4133	108.056	4.36561	33.7867	3.34658	10.8397
2011-12-30 18:11:46	-52.644	-42.9867	14.4146	107.978	4.3232	33.7876	3.33005	10.8379
2011-12-30 18:12:47	-52.6441	-42.9878	14.372	107.902	4.27823	33.7866	3.38	10.8361
2011-12-30 18:13:47	-52.6442	-42.9889	14.3767	107.846	4.24869	33.7864	3.36919	10.8343
2011-12-30 18:14:47	-52.6443	-42.99	14.3843	107.799	4.22161	33.7878	3.34	10.8326
2011-12-30 18:15:48	-52.6444	-42.9912	14.3674	107.764	4.2009	33.7872	3.36084	10.8308
2011-12-30 18:16:48	-52.6446	-42.9924	14.3692	107.742	4.1865	33.7876	3.34333	10.829
2011-12-30 18:17:49	-52.6447	-42.9935	14.3437	107.742	4.18473	33.7855	3.39203	10.8272
2011-12-30 18:18:49	-52.6448	-42.9943	14.3376	107.747	4.18645	33.7869	3.41053	10.8254
2011-12-30 18:19:50	-52.6449	-42.9949	14.3463	107.74	4.18142	33.7867	3.39	10.8236
2011-12-30 18:20:50	-52.6451	-42.9953	14.3526	107.738	4.17965	33.7856	3.38	10.8218
2011-12-30 18:21:51	-52.6453	-42.9956	14.3403	107.76	4.18894	33.7874	3.40241	10.8199
2011-12-30 18:22:51	-52.6455	-42.9958	14.3429	107.763	4.18893	33.7872	3.39576	10.8181
2011-12-30 18:23:51	-52.6457	-42.9959	14.3453	107.736	4.17365	33.7847	3.39	10.8163
2011-12-30 18:24:52	-52.646	-42.9959	14.3309	107.729	4.1672	33.7867	3.40886	10.8145
2011-12-30 18:25:52	-52.6463	-42.9959	14.3455	107.73	4.16706	33.7853	3.38	10.8126
2011-12-30 18:26:53	-52.6466	-42.9958	14.3313	107.725	4.16284	33.7866	3.40944	10.8108
2011-12-30 18:27:53	-52.647	-42.9957	14.3306	107.731	4.1647	33.7862	3.41156	10.809
2011-12-30 18:28:54	-52.6473	-42.9956	14.3439	107.738	4.1668	33.7854	3.38236	10.8072
2011-12-30 18:29:54	-52.6477	-42.9957	14.3472	107.736	4.16497	33.788	3.38	10.8055
2011-12-30 18:30:55	-52.6481	-42.9958	14.3518	107.732	4.16206	33.7868	3.37179	10.8037
2011-12-30 18:31:55	-52.6484	-42.9959	14.3563	107.741	4.16588	33.7874	3.36513	10.8019
2011-12-30 18:32:56	-52.6487	-42.9961	14.3702	107.796	4.19423	33.7872	3.35404	10.8001
2011-12-30 18:33:56	-52.6489	-42.9965	14.3597	107.827	4.20925	33.7879	3.38	10.7983
2011-12-30 18:34:56	-52.6492	-42.9968	14.357	107.817	4.20238	33.7901	3.3822	10.7965
2011-12-30 18:35:57	-52.6494	-42.9973	14.379	107.828	4.20704	33.7884	3.34	10.7947
2011-12-30 18:36:57	-52.6493	-42.9986	14.3575	107.854	4.21779	33.7878	3.38	10.7929
2011-12-30 18:37:58	-52.6484	-42.9993	14.376	107.881	4.23149	33.7858	3.35166	10.7907
2011-12-30 18:38:58	-52.6475	-42.9978	14.3527	107.892	4.23634	33.7876	3.41	10.7883
2011-12-30 18:39:59	-52.6471	-42.9946	14.3605	107.877	4.22645	33.7874	3.39	10.7858
2011-12-30 18:40:59	-52.647	-42.9904	14.3765	107.876	4.22666	33.7851	3.37369	10.7835
2011-12-30 18:41:59	-52.6472	-42.9855	14.3866	107.876	4.22305	33.786	3.34	10.7811
2011-12-30 18:43:00	-52.6474	-42.9802	14.3889	107.89	4.22977	33.7871	3.34476	10.7787
2011-12-30 18:44:00	-52.6476	-42.9748	14.4017	107.897	4.23163	33.786	3.32	10.7763
2011-12-30 18:45:01	-52.6479	-42.9692	14.4026	107.896	4.22989	33.7908	3.32	10.7738
2011-12-30 18:46:01	-52.6481	-42.9636	14.3906	107.898	4.22792	33.7893	3.34	10.7714
2011-12-30 18:47:02	-52.6484	-42.958	14.4044	107.915	4.23707	33.7838	3.3281	10.769
2011-12-30 18:48:02	-52.6485	-42.9523	14.3908	107.959	4.25748	33.7734	3.35911	10.7665
2011-12-30 18:49:03	-52.6487	-42.9469	14.3883	108.014	4.28496	33.7678	3.3801	10.7641
2011-12-30 18:50:03	-52.6491	-42.9414	14.3754	108.067	4.30992	33.7667	3.41085	10.7617
2011-12-30 18:51:03	-52.6493	-42.9358	14.375	108.128	4.34064	33.7649	3.42646	10.7593
2011-12-30 18:52:04	-52.6496	-42.9302	14.3788	108.205	4.37998	33.7588	3.44	10.7569
2011-12-30 18:53:04	-52.6499	-42.9245	14.3802	108.28	4.41644	33.7584	3.44732	10.7545
2011-12-30 18:54:05	-52.6502	-42.9188	14.3879	108.306	4.4302	33.7561	3.45	10.7521
2011-12-30 18:55:05	-52.6504	-42.9131	14.4032	108.253	4.40005	33.7545	3.40452	10.7496
2011-12-30 18:56:06	-52.6507	-42.9074	14.4025	108.17	4.35397	33.7523	3.38354	10.7472
2011-12-30 18:57:06	-52.6509	-42.9018	14.3628	108.105	4.31664	33.7492	3.44263	10.7448
2011-12-30 20:15:35	-52.6666	-42.4917	14.0825	102.807	1.44405	33.7739	2.65478	10.5227
2011-12-30 20:16:35	-52.6668	-42.486	14.0863	102.814	1.44726	33.7702	2.65199	10.5198
2011-12-30 20:17:36	-52.6671	-42.4803	14.0935	102.752	1.41483	33.7689	2.62332	10.517
2011-12-30 20:18:36	-52.6673	-42.4745	14.101	102.81	1.44382	33.7681	2.62237	10.5141
2011-12-30 20:19:37	-52.6675	-42.4687	14.1064	102.861	1.46972	33.7664	2.63165	10.5112
2011-12-30 20:20:37	-52.6677	-42.4629	14.0969	102.845	1.46034	33.765	2.6408	10.5082
2011-12-30 20:21:38	-52.6679	-42.4572	14.0891	102.655	1.36269	33.7637	2.61	10.5053
2011-12-30 20:22:38	-52.6681	-42.4516	14.0923	102.78	1.42533	33.762	2.63	10.5024
2011-12-30 20:23:38	-52.6683	-42.4459	14.0877	102.91	1.49082	33.7648	2.67	10.4995
2011-12-30 20:24:39	-52.6684	-42.4401	14.0845	102.828	1.44823	33.7666	2.66	10.4966
2011-12-30 20:25:39	-52.6686	-42.4344	14.0734	102.558	1.30992	33.7666	2.61303	10.4937
2011-12-30 20:26:39	-52.6688	-42.4287	14.0741	102.425	1.24164	33.767	2.58	10.4915
2011-12-30 20:27:40	-52.6689	-42.4229	14.0715	102.16	1.10594	33.7636	2.51465	10.4895
2011-12-30 20:28:40	-52.6691	-42.4173	14.0815	102.019	1.03356	33.7629	2.46	10.4875
2011-12-30 20:29:41	-52.6693	-42.4116	14.0983	102.332	1.19323	33.7573	2.51	10.4856
2011-12-30 20:30:41	-52.6694	-42.4059	14.1255	102.327	1.19071	33.7574	2.46	10.4836
2011-12-30 20:31:41	-52.6696	-42.4001	14.1384	102.537	1.29707	33.7553	2.48326	10.4817
2011-12-30 20:32:42	-52.6698	-42.3944	14.1473	102.756	1.40841	33.7552	2.52581	10.4797
2011-12-30 20:33:42	-52.6699	-42.3888	14.141	102.637	1.34735	33.7585	2.50933	10.4777
2011-12-30 20:34:43	-52.6701	-42.3831	14.1337	102.635	1.34549	33.7596	2.52026	10.4758
2011-12-30 20:35:43	-52.6703	-42.3774	14.1309	102.566	1.31023	33.7601	2.50794	10.4738
2011-12-30 20:36:44	-52.6704	-42.3718	14.1164	102.497	1.27444	33.7589	2.518	10.472
2011-12-30 20:37:44	-52.6705	-42.3661	14.1156	102.446	1.24838	33.7584	2.51	10.4703
2011-12-30 20:38:44	-52.6707	-42.3605	14.1083	102.376	1.21209	33.7605	2.5	10.4686
2011-12-30 20:39:45	-52.671	-42.3548	14.1081	102.49	1.26963	33.7572	2.53	10.467
2011-12-30 20:40:45	-52.6712	-42.3491	14.1075	102.413	1.2297	33.7568	2.51	10.4654
2011-12-30 20:41:46	-52.6715	-42.3433	14.1059	102.401	1.22357	33.7563	2.51	10.4638
2011-12-30 20:42:46	-52.6717	-42.3377	14.0988	102.396	1.2203	33.7558	2.51738	10.4621
2011-12-30 20:43:47	-52.672	-42.332	14.0997	102.329	1.18581	33.756	2.5	10.4605
2011-12-30 20:44:47	-52.6722	-42.3263	14.102	102.401	1.22262	33.7521	2.52078	10.4586
2011-12-30 20:45:48	-52.6725	-42.3207	14.1095	102.577	1.3109	33.7518	2.55	10.4559
2011-12-30 20:46:48	-52.6727	-42.315	14.1042	102.582	1.31226	33.755	2.55117	10.4532
2011-12-30 20:47:49	-52.673	-42.3094	14.0964	102.72	1.38156	33.7601	2.60199	10.4505
2011-12-30 20:48:49	-52.6733	-42.3036	14.087	102.738	1.38998	33.7614	2.62304	10.4478
2011-12-30 20:49:50	-52.6735	-42.2978	14.0706	102.567	1.30279	33.7637	2.61	10.4451
2011-12-30 20:50:50	-52.6738	-42.2921	14.0505	102.419	1.22699	33.7632	2.61	10.4424
2011-12-30 20:51:50	-52.6741	-42.2863	14.0336	102.428	1.23085	33.7643	2.64417	10.4397
2011-12-30 20:52:51	-52.6743	-42.2806	14.0226	102.628	1.33054	33.7676	2.70665	10.4369
2011-12-30 20:53:51	-52.6746	-42.2749	14.0321	102.919	1.47667	33.7737	2.76763	10.4342
2011-12-30 20:54:52	-52.6748	-42.2692	14.0291	103.09	1.56195	33.7765	2.81512	10.4315
2011-12-30 20:55:52	-52.6751	-42.2637	14.0019	102.84	1.43509	33.7806	2.79852	10.4288
2011-12-30 20:56:53	-52.6753	-42.2581	13.9795	102.546	1.28645	33.7813	2.77	10.4261
2011-12-30 20:57:53	-52.6756	-42.2525	13.9584	102.511	1.26758	33.7782	2.79712	10.4235
2011-12-30 20:58:53	-52.6759	-42.2469	13.9523	102.444	1.23325	33.7763	2.79	10.4208
2011-12-30 20:59:54	-52.6761	-42.2412	13.966	102.551	1.28688	33.7774	2.7956	10.4181
2011-12-30 21:00:54	-52.6764	-42.2355	13.9557	102.593	1.30674	33.7795	2.82375	10.4154
2011-12-30 21:01:55	-52.6766	-42.2298	13.9466	102.437	1.22765	33.7783	2.8	10.4126
2011-12-30 21:02:55	-52.6769	-42.2242	13.9476	102.564	1.29123	33.7793	2.8344	10.4099
2011-12-30 21:03:56	-52.6771	-42.2185	13.9356	102.547	1.28186	33.781	2.85	10.4072
2011-12-30 21:04:56	-52.6774	-42.2129	13.9353	102.517	1.26598	33.7827	2.8422	10.4045
2011-12-30 21:05:57	-52.6777	-42.2073	13.9249	102.632	1.32274	33.7827	2.88638	10.4019
2011-12-30 21:06:57	-52.6779	-42.2017	13.9275	102.647	1.32979	33.7807	2.89	10.3992
2011-12-30 21:07:58	-52.6782	-42.1962	13.9178	102.644	1.32789	33.7822	2.90972	10.3983
2011-12-30 21:08:58	-52.6785	-42.1905	13.9172	102.631	1.32152	33.7851	2.90768	10.3974
2011-12-30 21:09:59	-52.6787	-42.1848	13.9051	102.387	1.19906	33.7853	2.87	10.3965
2011-12-30 21:10:59	-52.679	-42.179	13.9052	102.457	1.2333	33.7855	2.88304	10.3956
2011-12-30 21:11:59	-52.6793	-42.1733	13.903	102.562	1.28579	33.7889	2.91	10.3947
2011-12-30 21:13:00	-52.6795	-42.1675	13.8889	102.341	1.17493	33.7887	2.88042	10.3938
2011-12-30 21:14:00	-52.6798	-42.1618	13.8958	102.347	1.17754	33.7879	2.87	10.3929
2011-12-30 21:15:01	-52.68	-42.156	13.8953	102.432	1.21996	33.7861	2.89	10.392
2011-12-30 21:16:01	-52.6803	-42.1503	13.893	102.45	1.2288	33.7873	2.90244	10.3911
2011-12-30 21:17:02	-52.6805	-42.1447	13.8934	102.486	1.24668	33.7855	2.91	10.3902
2011-12-30 21:18:02	-52.6808	-42.1391	13.8797	102.328	1.16695	33.7865	2.89	10.3892
2011-12-30 21:19:03	-52.681	-42.1335	13.8859	102.381	1.1938	33.7868	2.9	10.3883
2011-12-30 21:20:03	-52.6812	-42.1279	13.8889	102.513	1.25943	33.7847	2.93	10.3873
2011-12-30 21:21:04	-52.6815	-42.1223	13.8871	102.415	1.21045	33.7834	2.90588	10.3867
2011-12-30 21:22:04	-52.6818	-42.1165	13.885	102.385	1.1953	33.7877	2.90295	10.3863
2011-12-30 21:23:04	-52.682	-42.1109	13.8783	102.348	1.17636	33.7874	2.90212	10.3858
2011-12-30 21:24:05	-52.6823	-42.1052	13.8717	102.335	1.16997	33.7867	2.91	10.3854
2011-12-30 21:25:05	-52.6825	-42.0995	13.8771	102.374	1.18896	33.7856	2.91	10.385
2011-12-30 21:26:06	-52.6828	-42.0937	13.8847	102.486	1.24491	33.7866	2.92335	10.3846
2011-12-30 21:27:06	-52.6831	-42.088	13.8841	102.461	1.23252	33.787	2.9175	10.3842
2011-12-30 21:28:07	-52.6834	-42.0824	13.8914	102.482	1.24287	33.783	2.91	10.3838
2011-12-30 21:29:07	-52.6837	-42.0766	13.8903	102.55	1.27676	33.7823	2.93	10.3835
2011-12-30 21:30:08	-52.684	-42.0708	13.8741	102.5	1.25124	33.7866	2.94071	10.3831
2011-12-30 21:31:08	-52.6844	-42.0651	13.8796	102.634	1.31821	33.7874	2.97	10.3825
2011-12-30 21:32:09	-52.6847	-42.0593	13.8666	102.474	1.23751	33.7869	2.94773	10.3798
2011-12-30 21:33:09	-52.6851	-42.0536	13.8647	102.576	1.28796	33.7901	2.98	10.3772
2011-12-30 21:34:10	-52.6853	-42.0478	13.8581	102.479	1.23868	33.7883	2.96413	10.3745
2011-12-30 21:35:10	-52.6857	-42.0421	13.8514	102.327	1.16243	33.7882	2.94	10.3718
2011-12-30 21:36:11	-52.686	-42.0363	13.8428	102.26	1.12828	33.7909	2.93615	10.3691
2011-12-30 21:37:11	-52.6863	-42.0306	13.8439	102.311	1.1531	33.7868	2.9471	10.3665
2011-12-30 21:38:12	-52.6866	-42.0249	13.8462	102.326	1.16014	33.7863	2.94808	10.3638
2011-12-30 21:39:12	-52.687	-42.0191	13.84	102.316	1.15448	33.7853	2.95884	10.3612
2011-12-30 21:40:12	-52.6873	-42.0135	13.8485	102.445	1.21848	33.7829	2.97971	10.3585
2011-12-30 21:41:13	-52.6876	-42.0079	13.8508	102.368	1.17908	33.7859	2.94853	10.3558
2011-12-30 21:42:13	-52.6879	-42.0023	13.8445	102.357	1.17293	33.7831	2.95642	10.3532
2011-12-30 21:43:14	-52.6882	-41.9966	13.8561	102.376	1.18258	33.7855	2.94732	10.3505
2011-12-30 21:44:14	-52.6885	-41.991	13.8526	102.345	1.1661	33.7827	2.94	10.3479
2011-12-30 21:45:15	-52.6888	-41.9853	13.858	102.494	1.23954	33.788	2.96559	10.3452
2011-12-30 21:46:15	-52.6892	-41.9797	13.8557	102.438	1.21133	33.787	2.96	10.3426
2011-12-30 21:47:16	-52.6895	-41.974	13.8614	102.408	1.19637	33.7877	2.95	10.3399
2011-12-30 21:48:16	-52.6898	-41.9681	13.859	102.39	1.18641	33.787	2.94286	10.3375
2011-12-30 21:49:17	-52.6902	-41.9623	13.8601	102.371	1.1772	33.7889	2.93812	10.338
2011-12-30 21:50:17	-52.6905	-41.9566	13.8526	102.309	1.14628	33.7873	2.93	10.3384
2011-12-30 21:51:18	-52.6908	-41.951	13.8655	102.391	1.1871	33.7864	2.93	10.3388
2011-12-30 21:52:18	-52.691	-41.9454	13.8629	102.497	1.23985	33.7881	2.96	10.3392
2011-12-30 21:53:18	-52.6913	-41.9397	13.8752	102.488	1.23538	33.7876	2.93	10.3396
2011-12-30 21:54:19	-52.6917	-41.9341	13.8708	102.443	1.21349	33.7865	2.93	10.34
2011-12-30 21:55:19	-52.692	-41.9285	13.8699	102.35	1.16729	33.7872	2.91	10.3404
2011-12-30 21:56:20	-52.6923	-41.9227	13.8686	102.344	1.16466	33.7868	2.91114	10.3409
2011-12-30 21:57:20	-52.6926	-41.9171	13.8619	102.271	1.12813	33.781	2.9	10.3413
2011-12-30 21:58:21	-52.6929	-41.9117	13.8642	102.261	1.12333	33.7795	2.89622	10.3416
2011-12-30 21:59:21	-52.6932	-41.9062	13.8698	102.327	1.1563	33.7797	2.90278	10.342
2011-12-30 22:00:22	-52.6935	-41.9006	13.8757	102.24	1.11354	33.7713	2.87	10.3423
2011-12-30 22:01:22	-52.6937	-41.8949	13.8962	102.379	1.18284	33.7797	2.88088	10.3427
2011-12-30 22:02:22	-52.6939	-41.8893	13.8827	102.266	1.12646	33.7795	2.8699	10.3431
2011-12-30 22:03:23	-52.6942	-41.8837	13.8897	102.503	1.24419	33.7788	2.90913	10.3435
2011-12-30 22:04:23	-52.6945	-41.8779	13.8919	102.453	1.21914	33.7779	2.89347	10.3439
2011-12-30 22:05:24	-52.6948	-41.8723	13.8873	102.398	1.19244	33.7785	2.89	10.3444
2011-12-30 22:06:24	-52.6951	-41.8665	13.8861	102.354	1.17105	33.7779	2.88722	10.3451
2011-12-30 22:07:25	-52.6954	-41.8608	13.8903	102.481	1.23356	33.7802	2.90553	10.3459
2011-12-30 22:08:25	-52.6957	-41.855	13.8893	102.464	1.22562	33.7799	2.90456	10.3466
2011-12-30 22:09:26	-52.696	-41.8492	13.8778	102.359	1.17341	33.7808	2.89744	10.3473
2011-12-30 22:10:26	-52.6962	-41.8435	13.8791	102.581	1.28329	33.7785	2.94823	10.348
2011-12-30 22:11:27	-52.6966	-41.8379	13.8738	102.618	1.30141	33.7813	2.96	10.3487
2011-12-30 22:12:27	-52.6969	-41.8323	13.89	102.625	1.30592	33.7827	2.94	10.3494
2011-12-30 22:13:28	-52.6972	-41.8266	13.8805	102.65	1.31819	33.7853	2.96	10.3501
2011-12-30 22:14:28	-52.6976	-41.8209	13.8738	102.763	1.37419	33.7894	2.99804	10.3508
2011-12-30 22:15:28	-52.6979	-41.8151	13.8582	102.628	1.30671	33.7868	2.99	10.3516
2011-12-30 22:16:29	-52.6984	-41.8093	13.856	102.609	1.29781	33.7877	2.99572	10.3524
2011-12-30 22:17:29	-52.6987	-41.8035	13.8368	102.46	1.22374	33.7872	2.99	10.3532
2011-12-30 22:18:30	-52.6991	-41.7978	13.8269	102.253	1.12095	33.7853	2.95528	10.352
2011-12-30 22:19:30	-52.6995	-41.7921	13.8232	102.284	1.13578	33.7821	2.97	10.3495
2011-12-30 22:20:31	-52.6998	-41.7865	13.8242	102.267	1.12646	33.7839	2.96369	10.3471
2011-12-30 22:21:31	-52.7002	-41.7808	13.8127	102.129	1.0576	33.785	2.94265	10.3446
2011-12-30 22:22:32	-52.7006	-41.7753	13.8214	102.183	1.08376	33.7813	2.94322	10.3421
2011-12-30 22:23:32	-52.7009	-41.7698	13.8325	102.129	1.05666	33.7775	2.91	10.3397
2011-12-30 22:24:33	-52.7013	-41.7643	13.8285	102.096	1.04003	33.7734	2.90981	10.3372
2011-12-30 22:25:33	-52.7016	-41.7588	13.8433	102.156	1.0696	33.7716	2.899	10.3347
2011-12-30 22:26:33	-52.702	-41.7532	13.8578	102.256	1.11847	33.7718	2.89	10.3322
2011-12-30 22:27:34	-52.7024	-41.7476	13.8698	102.169	1.07503	33.7697	2.85287	10.3298
2011-12-30 22:28:34	-52.7028	-41.7419	13.8876	102.042	1.01211	33.7678	2.78761	10.3273
2011-12-30 22:29:35	-52.7031	-41.7363	13.8916	102.093	1.03707	33.7677	2.79	10.3248
2011-12-30 22:30:35	-52.7035	-41.7306	13.9063	102.152	1.06639	33.763	2.77678	10.3249
2011-12-30 22:31:36	-52.7038	-41.7249	13.9202	102.3	1.13967	33.7605	2.79	10.3263
2011-12-30 22:32:36	-52.7042	-41.7193	13.9528	102.445	1.21235	33.763	2.77	10.3278
2011-12-30 22:33:37	-52.7045	-41.7136	13.9666	102.784	1.37982	33.7656	2.82249	10.3292
2011-12-30 22:34:37	-52.7049	-41.708	13.9751	102.658	1.31828	33.7661	2.77888	10.3307
2011-12-30 22:35:37	-52.7052	-41.7023	13.9702	102.689	1.3335	33.7654	2.79	10.3322
2011-12-30 22:36:38	-52.7056	-41.6967	13.9663	102.639	1.30968	33.7684	2.79	10.3336
2011-12-30 22:37:38	-52.7059	-41.6911	NaN	NaN	NaN	33.7698	2.76843	10.3351
2011-12-30 22:38:39	-52.7063	-41.6856	13.9652	102.73	1.35489	33.7705	2.80496	10.3365
2011-12-30 22:39:39	-52.7067	-41.68	13.9619	102.632	1.30664	33.7679	2.79	10.3379
2011-12-30 22:40:40	-52.7071	-41.6745	13.9658	102.599	1.29064	33.7671	2.77442	10.3394
2011-12-30 22:41:40	-52.7075	-41.6689	13.9665	102.648	1.31526	33.7675	2.78517	10.3409
2011-12-30 22:42:41	-52.7079	-41.6632	13.9675	102.575	1.27962	33.7679	2.76218	10.3423
2011-12-30 22:43:41	-52.7082	-41.6577	13.9663	102.744	1.36345	33.77	2.8042	10.3438
2011-12-30 22:44:41	-52.7086	-41.6522	13.9591	102.629	1.30669	33.7683	2.78798	10.3452
2011-12-30 22:45:42	-52.709	-41.6466	13.9669	102.505	1.24607	33.7667	2.74889	10.3466
2011-12-30 22:46:42	-52.7094	-41.6411	13.9621	102.464	1.22561	33.7603	2.74072	10.348
2011-12-30 22:47:43	-52.7097	-41.6355	13.9699	102.513	1.25102	33.7592	2.74934	10.3495
2011-12-30 22:48:43	-52.7101	-41.6298	13.9553	102.544	1.26577	33.7577	2.77	10.351
2011-12-30 22:49:44	-52.7106	-41.6242	13.9762	102.981	1.4828	33.7584	2.84234	10.3524
2011-12-30 22:50:44	-52.711	-41.6185	13.9833	103.122	1.55311	33.7608	2.86308	10.3534
2011-12-30 22:51:44	-52.7113	-41.6129	13.9863	103.278	1.63124	33.7617	2.90604	10.3544
2011-12-30 22:52:45	-52.7117	-41.6074	13.9611	103.206	1.59539	33.7619	2.9351	10.3553
2011-12-30 22:53:45	-52.7121	-41.6018	13.9391	103.006	1.496	33.7636	2.92556	10.3563
2011-12-30 22:54:46	-52.7125	-41.5963	13.9214	102.932	1.45918	33.7649	2.93	10.3572
2011-12-30 22:55:46	-52.7129	-41.5907	13.9059	102.824	1.40546	33.7664	2.93254	10.3582
2011-12-30 22:56:47	-52.7133	-41.5852	13.8948	102.76	1.37374	33.7671	2.93151	10.3592
2011-12-30 22:57:47	-52.7137	-41.5795	13.8858	102.914	1.45011	33.7656	2.99	10.3602
2011-12-30 22:58:48	-52.7142	-41.5739	13.8811	102.833	1.41061	33.7661	2.97996	10.3612
2011-12-30 22:59:48	-52.7146	-41.5682	13.8776	102.935	1.46118	33.7687	3.01685	10.3623
2011-12-30 23:00:48	-52.7151	-41.5624	13.8618	102.754	1.3716	33.7703	2.99581	10.3633
2011-12-30 23:01:49	-52.7155	-41.5567	13.8587	102.908	1.44789	33.7724	3.03592	10.3644
2011-12-30 23:02:49	-52.7159	-41.5511	13.8509	102.921	1.45466	33.7729	3.05616	10.3654
2011-12-30 23:03:50	-52.7163	-41.5457	13.8349	102.849	1.41861	33.7742	3.06	10.3663
2011-12-30 23:04:50	-52.7167	-41.5401	13.8243	102.818	1.40335	33.7741	3.08	10.3672
2011-12-30 23:05:51	-52.7171	-41.5345	13.8257	102.823	1.40636	33.7757	3.08	10.3682
2011-12-30 23:06:51	-52.7175	-41.5289	13.821	102.819	1.40359	33.776	3.08241	10.3671
2011-12-30 23:07:52	-52.7179	-41.5231	13.7997	102.752	1.36963	33.7764	3.1	10.3651
2011-12-30 23:08:52	-52.7183	-41.5174	13.8037	102.75	1.36778	33.7759	3.09	10.3631
2011-12-30 23:09:53	-52.7187	-41.5118	13.7985	102.7	1.34263	33.7773	3.08983	10.3611
2011-12-30 23:10:53	-52.719	-41.5062	13.7987	102.711	1.34749	33.7777	3.09	10.359
2011-12-30 23:11:53	-52.7194	-41.5006	13.782	102.626	1.30492	33.7792	3.09811	10.357
2011-12-30 23:12:54	-52.7198	-41.495	13.7874	102.685	1.33385	33.7786	3.1	10.3565
2011-12-30 23:13:54	-52.7202	-41.4895	13.7833	102.711	1.34708	33.778	3.11374	10.358
2011-12-30 23:14:55	-52.7206	-41.4839	13.771	102.556	1.27021	33.779	3.09468	10.3595
2011-12-30 23:15:55	-52.7209	-41.4784	13.7739	102.793	1.38766	33.7813	3.14435	10.361
2011-12-30 23:16:56	-52.7213	-41.4729	13.7755	102.687	1.3359	33.7822	3.12	10.3625
2011-12-30 23:17:56	-52.7217	-41.4673	13.7718	102.807	1.39559	33.7837	3.15757	10.3641
2011-12-30 23:18:57	-52.7221	-41.4617	13.7648	102.859	1.42137	33.7851	3.18	10.3656
2011-12-30 23:19:57	-52.7225	-41.4561	13.7616	102.919	1.45198	33.784	3.2094	10.3671
2011-12-30 23:20:58	-52.7229	-41.4506	13.7552	102.729	1.35782	33.7869	3.17	10.3687
2011-12-30 23:21:58	-52.7232	-41.4449	13.7494	102.789	1.3875	33.788	3.18872	10.3702
2011-12-30 23:22:59	-52.7236	-41.4392	13.7415	102.732	1.35974	33.7886	3.18765	10.3717
2011-12-30 23:23:59	-52.724	-41.4336	13.7345	102.666	1.32679	33.7889	3.18	10.3733
2011-12-30 23:25:00	-52.7243	-41.428	13.7287	102.576	1.28263	33.7903	3.17	10.3748
2011-12-30 23:26:00	-52.7247	-41.4223	13.728	102.615	1.30211	33.7927	3.18	10.3764
2011-12-30 23:27:00	-52.7251	-41.4167	13.7197	102.593	1.29142	33.7927	3.1841	10.3779
2011-12-30 23:28:01	-52.7255	-41.4111	13.7242	102.624	1.30767	33.7908	3.19	10.3795
2011-12-30 23:29:01	-52.7259	-41.4055	13.7232	102.593	1.29242	33.7954	3.18	10.381
2011-12-30 23:30:02	-52.7263	-41.3999	13.7287	102.584	1.28864	33.7938	3.18	10.3825
2011-12-30 23:31:02	-52.7267	-41.3942	13.726	102.604	1.29881	33.7942	3.18	10.3841
2011-12-30 23:32:03	-52.7271	-41.3885	13.7248	102.592	1.29321	33.7945	3.18081	10.3857
2011-12-30 23:33:03	-52.7276	-41.3828	13.7252	102.696	1.34485	33.7947	3.20114	10.3873
2011-12-30 23:34:04	-52.7279	-41.3772	13.7304	102.717	1.3558	33.7965	3.19583	10.3888
2011-12-30 23:35:04	-52.7283	-41.3715	13.7293	102.72	1.35753	33.796	3.2	10.3901
2011-12-30 23:36:04	-52.7287	-41.3658	13.7256	102.747	1.37094	33.7971	3.21217	10.3911
2011-12-30 23:37:05	-52.7291	-41.3601	13.726	102.795	1.39529	33.7976	3.22484	10.392
2011-12-30 23:38:05	-52.7295	-41.3545	13.7154	102.685	1.34031	33.7966	3.21415	10.393
2011-12-30 23:39:06	-52.7298	-41.3488	13.7125	102.704	1.35011	33.7983	3.22	10.394
2011-12-30 23:40:06	-52.7301	-41.3431	13.7139	102.739	1.36783	33.799	3.23229	10.3949
2011-12-30 23:41:07	-52.7304	-41.3375	13.7114	102.823	1.40969	33.7997	3.25724	10.3959
2011-12-30 23:42:07	-52.7307	-41.3317	13.7129	102.815	1.40627	33.7977	3.25062	10.3969
2011-12-30 23:43:08	-52.7311	-41.326	13.709	102.752	1.37475	33.8005	3.24	10.3978
2011-12-30 23:44:08	-52.7314	-41.3203	13.6961	102.794	1.39546	33.8013	3.27	10.3988
2011-12-30 23:45:09	-52.7317	-41.3145	13.6891	102.764	1.38085	33.8018	3.2724	10.3998
2011-12-30 23:46:09	-52.732	-41.3088	13.7005	103.173	1.58458	33.8049	3.35335	10.4008
2011-12-30 23:47:10	-52.7323	-41.3032	13.6883	103.233	1.61425	33.8114	3.39	10.4017
2011-12-30 23:48:10	-52.7326	-41.2975	13.6738	103.153	1.57441	33.8138	3.4	10.4027
2011-12-30 23:49:10	-52.7329	-41.2918	13.6523	103.006	1.50175	33.8168	3.41	10.4036
2011-12-30 23:50:11	-52.7332	-41.2862	13.6287	102.834	1.41593	33.8174	3.40688	10.4045
2011-12-30 23:51:11	-52.7335	-41.2806	13.6083	102.743	1.37038	33.8176	3.4178	10.4055
2011-12-30 23:52:12	-52.7338	-41.2748	13.5912	102.54	1.2693	33.8185	3.4	10.4065
2011-12-30 23:53:12	-52.7341	-41.2691	13.5856	102.506	1.25272	33.8156	3.40946	10.4074
2011-12-30 23:54:13	-52.7345	-41.2633	13.5815	102.483	1.24119	33.8191	3.41	10.4073
2011-12-30 23:55:13	-52.7348	-41.2577	13.5796	102.497	1.24792	33.8187	3.41	10.4077
2011-12-30 23:56:14	-52.7351	-41.252	13.5759	102.493	1.24643	33.82	3.42	10.4088
2011-12-30 23:57:14	-52.7354	-41.2462	13.5706	102.47	1.23502	33.8187	3.42	10.41
2011-12-30 23:58:15	-52.7357	-41.2405	13.5672	102.441	1.22046	33.8187	3.4171	10.4112
2011-12-30 23:59:15	-52.7359	-41.2348	13.5594	102.411	1.20575	33.8182	3.42547	10.4123
2011-12-31 00:00:16	-52.7362	-41.2291	13.5575	102.434	1.21745	33.8192	3.44	10.4136
2011-12-31 00:01:16	-52.7365	-41.2234	13.5414	102.32	1.16028	33.8201	3.42684	10.4155
2011-12-31 00:02:16	-52.7368	-41.2177	13.5407	102.407	1.20474	33.8181	3.46328	10.4173
2011-12-31 00:03:17	-52.7372	-41.2119	13.5345	102.327	1.16486	33.8196	3.44716	10.4192
2011-12-31 00:04:17	-52.7375	-41.2062	13.5282	102.218	1.11077	33.8204	3.43218	10.421
2011-12-31 00:05:18	-52.7379	-41.2005	13.5324	102.377	1.19094	33.8209	3.47138	10.4229
2011-12-31 00:06:18	-52.7383	-41.1949	13.5255	102.312	1.15831	33.8208	3.46063	10.4248
2011-12-31 00:07:19	-52.7386	-41.1891	13.524	102.375	1.18975	33.8204	3.47236	10.4266
2011-12-31 00:08:19	-52.739	-41.1834	13.5128	102.312	1.15899	33.8196	3.48	10.4285
2011-12-31 00:09:20	-52.7394	-41.1776	13.5102	102.3	1.15328	33.8187	3.48	10.4304
2011-12-31 00:10:20	-52.7398	-41.1719	13.5026	102.244	1.12547	33.8211	3.48	10.4322
2011-12-31 00:11:21	-52.7401	-41.1661	13.4936	102.304	1.15558	33.8215	3.51	10.4341
2011-12-31 00:12:21	-52.7405	-41.1604	13.4968	102.158	1.08321	33.822	3.46785	10.436
2011-12-31 00:13:21	-52.7409	-41.1547	13.5018	102.349	1.17935	33.8224	3.51	10.4379
2011-12-31 00:14:22	-52.7413	-41.1489	13.5008	102.334	1.17189	33.8212	3.50332	10.4398
2011-12-31 00:15:22	-52.7416	-41.1432	13.4894	102.153	1.08151	33.8239	3.48088	10.4416
2011-12-31 00:16:23	-52.742	-41.1375	13.4869	102.271	1.14069	33.8228	3.51	10.4435
2011-12-31 00:17:23	-52.7424	-41.1319	13.4921	102.179	1.09528	33.8278	3.48	10.4453
2011-12-31 00:18:24	-52.7427	-41.1263	13.4954	102.278	1.14521	33.8238	3.49911	10.4472
2011-12-31 00:19:24	-52.7431	-41.1206	13.4837	102.136	1.07443	33.8231	3.48135	10.4493
2011-12-31 00:20:25	-52.7435	-41.115	13.4912	102.215	1.11468	33.8257	3.49208	10.4516
2011-12-31 00:21:25	-52.7439	-41.1093	13.4844	102.191	1.10313	33.8249	3.50112	10.4538
2011-12-31 00:22:25	-52.7442	-41.1036	13.4863	101.995	1.00473	33.8252	3.44741	10.4561
2011-12-31 00:23:26	-52.7446	-41.0978	13.4791	102.057	1.0365	33.8273	3.47636	10.4584
2011-12-31 00:24:26	-52.745	-41.092	13.482	101.91	0.963072	33.8265	3.43538	10.4607
2011-12-31 00:25:26	-52.7454	-41.0863	13.496	101.957	0.987236	33.8239	3.42596	10.4629
2011-12-31 00:26:27	-52.7458	-41.0807	13.4952	101.942	0.979973	33.8232	3.42	10.4652
2011-12-31 00:27:27	-52.7461	-41.0751	13.4966	101.952	0.985411	33.8246	3.42	10.4674
2011-12-31 00:28:28	-52.7465	-41.0695	13.5052	102.333	1.17796	33.8226	3.49618	10.4697
2011-12-31 00:29:28	-52.7469	-41.0638	13.5214	102.506	1.26538	33.8263	3.51	10.4719
2011-12-31 00:30:28	-52.7474	-41.0581	13.5204	102.727	1.37767	33.8247	3.5796	10.4742
2011-12-31 00:31:29	-52.7478	-41.0526	13.5105	102.928	1.4791	33.8242	3.64	10.4764
2011-12-31 00:32:29	-52.7482	-41.047	13.4877	102.864	1.44672	33.8335	3.6678	10.4787
2011-12-31 00:33:29	-52.7486	-41.0414	13.4671	102.704	1.36679	33.8304	3.66805	10.4809
2011-12-31 00:34:30	-52.7489	-41.0357	13.4418	102.532	1.28013	33.8317	3.67457	10.4832
2011-12-31 00:35:30	-52.7493	-41.0301	13.4046	102.202	1.11385	33.8342	3.66	10.4854
2011-12-31 00:36:31	-52.7497	-41.0244	13.3784	101.977	1.00005	33.8302	3.65	10.4871
2011-12-31 00:37:31	-52.7501	-41.0187	13.3694	102.002	1.01267	33.8295	3.67	10.4867
2011-12-31 00:38:32	-52.7504	-41.013	13.3764	102.002	1.0123	33.8308	3.65602	10.4863
2011-12-31 00:39:32	-52.7508	-41.0074	13.3744	101.964	0.993446	33.8307	3.65	10.4859
2011-12-31 00:40:32	-52.7512	-41.0017	13.3707	101.929	0.975667	33.8311	3.64777	10.4855
2011-12-31 00:41:33	-52.7515	-40.996	13.3749	101.931	0.976765	33.8308	3.63718	10.4859
2011-12-31 00:42:33	-52.7519	-40.9904	13.3808	101.854	0.937713	33.8333	3.60053	10.4871
2011-12-31 00:43:34	-52.7523	-40.9848	13.3864	101.808	0.915104	33.8297	3.58017	10.4884
2011-12-31 00:44:34	-52.7527	-40.9794	13.3923	101.727	0.874762	33.8264	3.55773	10.4897
2011-12-31 00:45:35	-52.7531	-40.9739	13.4012	101.914	0.969078	33.8186	3.58	10.4909
2011-12-31 00:46:35	-52.7535	-40.9683	13.4169	102.119	1.07311	33.8181	3.60624	10.4923
2011-12-31 00:47:36	-52.754	-40.9627	13.4338	102.307	1.16862	33.8206	3.62412	10.4936
2011-12-31 00:48:36	-52.7544	-40.957	13.4369	102.333	1.18186	33.8186	3.62513	10.4949
2011-12-31 00:49:36	-52.7548	-40.9513	13.4351	102.297	1.16427	33.8169	3.61821	10.4963
2011-12-31 00:50:37	-52.7552	-40.9455	13.4321	102.261	1.14597	33.8165	3.61348	10.4976
2011-12-31 00:51:37	-52.7556	-40.9399	13.423	102.132	1.081	33.8167	3.59772	10.4989
2011-12-31 00:52:38	-52.756	-40.9344	13.4206	102.254	1.14262	33.8161	3.63	10.5002
2011-12-31 00:53:38	-52.7564	-40.9289	13.4248	102.33	1.18144	33.8162	3.64	10.5015
2011-12-31 00:54:39	-52.7569	-40.9233	13.43	102.517	1.27666	33.8155	3.68	10.5027
2011-12-31 00:55:39	-52.7572	-40.9176	13.424	102.559	1.2978	33.8122	3.7	10.504
2011-12-31 00:56:40	-52.7576	-40.912	13.4166	102.576	1.30679	33.8124	3.72	10.5053
2011-12-31 00:57:40	-52.7579	-40.9064	13.4046	102.458	1.2469	33.8113	3.71087	10.5065
2011-12-31 00:58:40	-52.7582	-40.9008	13.3914	102.508	1.27213	33.8105	3.74604	10.5078
2011-12-31 00:59:41	-52.7586	-40.8952	13.3826	102.369	1.202	33.81	3.72967	10.5091
2011-12-31 01:00:41	-52.759	-40.8895	13.3804	102.351	1.19358	33.8076	3.73149	10.5104
2011-12-31 01:01:42	-52.7593	-40.8839	13.3756	102.3	1.16772	33.8099	3.72334	10.5116
2011-12-31 01:02:42	-52.7597	-40.8784	13.3726	102.328	1.182	33.8059	3.74	10.5129
2011-12-31 01:03:43	-52.7601	-40.8728	13.3669	102.214	1.12465	33.8061	3.72	10.5146
2011-12-31 01:04:43	-52.7604	-40.8672	13.3608	102.193	1.11428	33.8049	3.72151	10.5171
2011-12-31 01:05:44	-52.7608	-40.8615	13.3669	102.302	1.16992	33.8046	3.74	10.5196
2011-12-31 01:06:44	-52.7612	-40.8557	13.3678	102.306	1.17273	33.8036	3.74112	10.522
2011-12-31 01:07:45	-52.7616	-40.8501	13.3796	102.393	1.2176	33.8047	3.74	10.5245
2011-12-31 01:08:45	-52.762	-40.8444	13.3671	102.347	1.19431	33.8029	3.75	10.527
2011-12-31 01:09:45	-52.7624	-40.8387	13.3667	102.323	1.18305	33.8029	3.74381	10.5294
2011-12-31 01:10:46	-52.7629	-40.8331	13.3728	102.339	1.19129	33.803	3.73477	10.5319
2011-12-31 01:11:46	-52.7633	-40.8275	13.3761	102.381	1.21343	33.8029	3.74	10.5344
2011-12-31 01:12:47	-52.7637	-40.8219	13.3829	102.473	1.26074	33.8004	3.75	10.5368
2011-12-31 01:13:47	-52.7641	-40.8165	13.3777	102.467	1.25793	33.8019	3.75741	10.5392
2011-12-31 01:14:48	-52.7645	-40.8109	13.379	102.498	1.27451	33.8008	3.76307	10.5416
2011-12-31 01:15:48	-52.7649	-40.8054	13.3792	102.572	1.31267	33.8027	3.77901	10.544
2011-12-31 01:16:49	-52.7653	-40.7998	13.375	102.631	1.34317	33.8025	3.8	10.5464
2011-12-31 01:17:49	-52.7657	-40.7943	13.3731	102.597	1.32654	33.8034	3.80131	10.5489
2011-12-31 01:18:50	-52.7661	-40.7888	13.3672	102.553	1.30427	33.8033	3.8	10.5513
2011-12-31 01:19:50	-52.7664	-40.7832	13.3663	102.621	1.33894	33.8024	3.81375	10.5514
2011-12-31 01:20:50	-52.7668	-40.7777	13.3586	102.5	1.27707	33.805	3.8	10.5515
2011-12-31 01:21:51	-52.7672	-40.7722	13.3528	102.563	1.30933	33.8041	3.82461	10.5516
2011-12-31 01:22:51	-52.7675	-40.7666	13.3468	102.662	1.35923	33.8039	3.86	10.5516
2011-12-31 01:23:52	-52.7678	-40.7611	13.3471	102.572	1.31343	33.8027	3.83668	10.5516
2011-12-31 01:24:52	-52.7681	-40.7555	13.3378	102.504	1.27894	33.8067	3.83767	10.5517
2011-12-31 01:25:53	-52.7684	-40.75	13.3401	102.522	1.28804	33.8052	3.84	10.5517
2011-12-31 01:26:53	-52.7686	-40.7445	13.3418	102.7	1.37881	33.8074	3.87881	10.5516
2011-12-31 01:27:54	-52.7689	-40.739	13.3336	102.632	1.34413	33.8082	3.87966	10.5517
2011-12-31 01:28:54	-52.7692	-40.7335	13.3293	102.666	1.36111	33.8087	3.89225	10.5517
2011-12-31 01:29:55	-52.7695	-40.7281	13.3168	102.532	1.29272	33.8064	3.88	10.5523
2011-12-31 01:30:55	-52.7697	-40.7225	13.3213	102.583	1.31916	33.8044	3.88713	10.5536
2011-12-31 01:31:55	-52.77	-40.7171	13.3201	102.569	1.31221	33.8048	3.8824	10.5548
2011-12-31 01:32:56	-52.7703	-40.7116	13.3154	102.584	1.32003	33.8043	3.8955	10.5561
2011-12-31 01:33:56	-52.7706	-40.7062	13.3129	102.526	1.29072	33.8017	3.88539	10.5574
2011-12-31 01:34:57	-52.771	-40.7008	13.3205	102.634	1.34655	33.8024	3.9	10.5587
2011-12-31 01:35:57	-52.7712	-40.6955	13.3117	102.705	1.38251	33.8036	3.93	10.56
2011-12-31 01:36:58	-52.7716	-40.6903	13.315	102.572	1.31518	33.8059	3.89	10.5613
2011-12-31 01:37:58	-52.7719	-40.6852	13.3224	102.667	1.36389	33.8035	3.9	10.5625
2011-12-31 01:38:58	-52.7722	-40.6802	13.3236	102.686	1.37372	33.8069	3.9	10.5636
2011-12-31 01:39:59	-52.7724	-40.6753	13.3248	102.603	1.33194	33.8064	3.88156	10.5648
2011-12-31 01:40:59	-52.7727	-40.6705	13.3232	102.634	1.34795	33.8052	3.89	10.5659
2011-12-31 01:42:00	-52.773	-40.6657	13.3112	102.533	1.29632	33.8036	3.88262	10.5671
2011-12-31 01:43:00	-52.7733	-40.6608	13.3183	102.599	1.33063	33.7975	3.89359	10.5683
2011-12-31 01:44:01	-52.7737	-40.6559	13.3118	102.57	1.31593	33.804	3.89557	10.5694
2011-12-31 01:45:01	-52.774	-40.6511	13.3046	102.642	1.35255	33.8053	3.92457	10.5706
2011-12-31 01:46:02	-52.7742	-40.6463	13.3058	102.39	1.22455	33.8066	3.86	10.5717
2011-12-31 01:47:02	-52.7745	-40.6416	13.3061	102.572	1.31751	33.8064	3.90454	10.5728
2011-12-31 01:48:03	-52.7749	-40.6371	13.3127	102.6	1.33235	33.8056	3.9	10.5739
2011-12-31 01:49:03	-52.7751	-40.6325	13.3141	102.567	1.31546	33.8068	3.88095	10.575
2011-12-31 01:50:03	-52.7754	-40.6278	13.3103	102.581	1.32261	33.8046	3.89	10.5761
2011-12-31 01:51:04	-52.7758	-40.6228	13.3212	102.627	1.34668	33.8044	3.88925	10.5776
2011-12-31 01:52:04	-52.7761	-40.6175	13.3147	102.579	1.32241	33.805	3.88331	10.5794
2011-12-31 01:53:05	-52.7764	-40.6121	13.3075	102.43	1.24634	33.8047	3.85751	10.5813
2011-12-31 01:54:05	-52.7768	-40.6066	13.3053	102.416	1.24011	33.8044	3.86339	10.5832
2011-12-31 01:55:06	-52.7771	-40.6011	13.3016	102.523	1.29496	33.8058	3.89431	10.5851
2011-12-31 01:56:06	-52.7775	-40.5955	13.3059	102.493	1.2798	33.8056	3.87487	10.587
2011-12-31 01:57:07	-52.7779	-40.5898	13.3157	102.551	1.31053	33.8058	3.87387	10.589
2011-12-31 01:58:07	-52.7782	-40.5841	13.3166	102.501	1.28524	33.8048	3.85568	10.591
2011-12-31 01:59:07	-52.7785	-40.5783	13.3207	102.447	1.25829	33.8044	3.83775	10.593
2011-12-31 02:00:08	-52.7788	-40.5727	13.3294	102.685	1.38075	33.8009	3.88	10.5949
2011-12-31 02:01:08	-52.7792	-40.5671	13.3252	102.45	1.26014	33.8006	3.82093	10.5969
2011-12-31 02:02:09	-52.7795	-40.5614	13.3273	102.632	1.35359	33.8007	3.86	10.5988
2011-12-31 02:03:09	-52.7798	-40.5557	13.3287	102.581	1.32847	33.8026	3.85133	10.6008
2011-12-31 02:04:10	-52.7802	-40.5502	13.3378	102.763	1.42182	33.8003	3.87446	10.6007
2011-12-31 02:05:10	-52.7806	-40.5447	13.3348	102.578	1.32705	33.8029	3.83802	10.6006
2011-12-31 02:06:10	-52.781	-40.5393	13.3369	102.593	1.3348	33.8002	3.84	10.6005
2011-12-31 02:07:11	-52.7814	-40.5338	13.3317	102.436	1.2543	33.8028	3.80964	10.6005
2011-12-31 02:08:11	-52.7818	-40.5283	13.3317	102.482	1.27766	33.8032	3.82	10.6004
2011-12-31 02:09:12	-52.7821	-40.5227	13.3407	102.459	1.26596	33.8014	3.7998	10.6002
2011-12-31 02:10:12	-52.7825	-40.5171	13.336	102.512	1.29287	33.8027	3.81484	10.6001
2011-12-31 02:11:13	-52.7829	-40.5116	13.3437	102.567	1.3215	33.8022	3.82	10.6
2011-12-31 02:12:13	-52.7832	-40.506	13.3476	102.447	1.25983	33.8049	3.77938	10.5999
2011-12-31 02:13:14	-52.7837	-40.5003	13.3563	102.521	1.29788	33.8055	3.78	10.5999
2011-12-31 02:14:14	-52.784	-40.4946	13.3599	102.471	1.27229	33.805	3.76	10.5998
2011-12-31 02:15:15	-52.7844	-40.489	13.353	102.485	1.27896	33.8065	3.77237	10.5997
2011-12-31 02:16:15	-52.7848	-40.4833	13.3589	102.55	1.31215	33.8065	3.77333	10.5996
2011-12-31 02:17:16	-52.7852	-40.4776	13.3731	102.645	1.36145	33.8076	3.77587	10.5995
2011-12-31 02:18:16	-52.7856	-40.4718	13.3754	102.678	1.37848	33.8081	3.78	10.5994
2011-12-31 02:19:17	-52.786	-40.4661	13.3745	102.525	1.29987	33.8076	3.74	10.5993
2011-12-31 02:20:17	-52.7864	-40.4605	13.3738	102.494	1.28407	33.8092	3.73295	10.5998
2011-12-31 02:21:17	-52.7867	-40.4548	13.3803	102.708	1.3943	33.8088	3.77787	10.6007
2011-12-31 02:22:18	-52.787	-40.4492	13.3773	102.505	1.29029	33.8076	3.73112	10.6015
2011-12-31 02:23:18	-52.7874	-40.4436	13.3834	102.628	1.35349	33.8102	3.7501	10.6024
2011-12-31 02:24:19	-52.7878	-40.4378	13.3825	102.676	1.37801	33.8082	3.76	10.6033
2011-12-31 02:25:19	-52.7881	-40.4321	13.3882	102.66	1.37065	33.8085	3.75182	10.6042
2011-12-31 02:26:20	-52.7885	-40.4264	13.3879	102.747	1.41531	33.8088	3.77	10.6051
2011-12-31 02:27:20	-52.7889	-40.4205	13.3883	102.706	1.39456	33.8093	3.76362	10.606
2011-12-31 02:28:21	-52.7892	-40.4148	13.3789	102.613	1.3466	33.8091	3.75	10.6069
2011-12-31 02:29:21	-52.7896	-40.409	13.3794	102.67	1.37605	33.8083	3.76542	10.6078
2011-12-31 02:30:22	-52.7899	-40.4032	13.3896	102.761	1.42351	33.8072	3.77	10.6087
2011-12-31 02:31:22	-52.7903	-40.3974	13.3782	102.669	1.3762	33.8099	3.76703	10.6096
2011-12-31 02:32:22	-52.7906	-40.3915	13.3872	102.691	1.38803	33.8097	3.75804	10.6105
2011-12-31 02:33:23	-52.791	-40.3858	13.3813	102.727	1.40656	33.8089	3.77881	10.6114
2011-12-31 02:34:23	-52.7914	-40.3802	13.3828	102.809	1.44901	33.8091	3.79938	10.6123
2011-12-31 02:35:24	-52.7918	-40.3744	13.3781	102.693	1.38899	33.8089	3.77	10.6133
2011-12-31 02:36:24	-52.7921	-40.3687	13.3788	102.704	1.39507	33.8064	3.77285	10.6148
2011-12-31 02:37:25	-52.7925	-40.363	13.3759	102.763	1.42587	33.8083	3.79	10.6163
2011-12-31 02:38:25	-52.7929	-40.3572	13.3837	102.843	1.46738	33.8077	3.79657	10.6179
2011-12-31 02:39:26	-52.7933	-40.3514	13.3786	102.824	1.45787	33.8087	3.8	10.6194
2011-12-31 02:40:26	-52.7936	-40.3456	13.3794	102.805	1.44881	33.8075	3.7951	10.621
2011-12-31 02:41:27	-52.794	-40.3398	13.3702	102.674	1.3817	33.8096	3.78384	10.6225
2011-12-31 02:42:27	-52.7944	-40.334	13.3604	102.624	1.3556	33.8096	3.7831	10.624
2011-12-31 02:43:27	-52.7948	-40.3282	13.3682	102.681	1.38571	33.8077	3.78224	10.6256
2011-12-31 02:44:28	-52.7952	-40.3224	13.3753	102.745	1.41925	33.8099	3.78852	10.6272
2011-12-31 02:45:28	-52.7955	-40.3167	13.3779	102.639	1.36475	33.8096	3.75	10.6278
2011-12-31 02:46:29	-52.7958	-40.3113	13.3773	102.665	1.37794	33.8109	3.75961	10.6273
2011-12-31 02:47:29	-52.7961	-40.3062	13.3791	102.755	1.42414	33.8134	3.77875	10.6269
2011-12-31 02:48:30	-52.7965	-40.3011	13.3786	102.711	1.40158	33.8082	3.76767	10.6265
2011-12-31 02:49:30	-52.7968	-40.2961	13.3803	102.769	1.43141	33.8074	3.78	10.6261
2011-12-31 02:50:31	-52.7972	-40.2911	13.3827	102.859	1.47757	33.809	3.8	10.6257
2011-12-31 02:51:31	-52.7975	-40.2862	13.3722	102.689	1.38952	33.807	3.77497	10.6253
2011-12-31 02:52:31	-52.7979	-40.2813	13.3806	102.77	1.43143	33.8084	3.78403	10.6249
2011-12-31 02:53:32	-52.7982	-40.2765	13.3767	102.898	1.49691	33.8068	3.82	10.6244
2011-12-31 02:54:32	-52.7984	-40.2718	13.37	102.692	1.39108	33.8073	3.78219	10.6239
2011-12-31 02:55:33	-52.7988	-40.2671	13.3677	102.75	1.42045	33.8061	3.8	10.6235
2011-12-31 02:56:33	-52.799	-40.2624	13.368	102.764	1.42753	33.8064	3.8	10.6229
2011-12-31 02:57:34	-52.7993	-40.2578	13.3696	102.71	1.40003	33.8026	3.78874	10.6225
2011-12-31 02:58:34	-52.7995	-40.2532	13.355	102.681	1.3845	33.8063	3.80288	10.622
2011-12-31 02:59:35	-52.7998	-40.2486	13.3567	102.681	1.38407	33.8059	3.8	10.6215
2011-12-31 03:00:35	-52.8001	-40.244	13.3562	102.55	1.3166	33.808	3.77	10.6211
2011-12-31 03:01:36	-52.8004	-40.2394	13.3517	102.642	1.36367	33.8036	3.8	10.6206
2011-12-31 03:02:36	-52.8007	-40.2349	13.3596	102.664	1.37507	33.8094	3.7903	10.6201
2011-12-31 03:03:36	-52.801	-40.2303	13.3613	102.635	1.36057	33.8071	3.7819	10.6197
2011-12-31 03:04:37	-52.8013	-40.2256	13.36	102.72	1.40338	33.8071	3.8	10.6192
2011-12-31 03:05:37	-52.8016	-40.2211	13.3592	102.652	1.36891	33.8081	3.79	10.6189
2011-12-31 03:06:38	-52.802	-40.2165	13.3549	102.673	1.3791	33.8071	3.8	10.6184
2011-12-31 03:07:38	-52.8023	-40.2119	13.3613	102.635	1.35983	33.8052	3.78104	10.6181
2011-12-31 03:08:39	-52.8026	-40.2073	13.3546	102.596	1.33937	33.8083	3.77916	10.6176
2011-12-31 03:09:39	-52.8029	-40.2028	13.3619	102.724	1.40492	33.8064	3.79624	10.6172
2011-12-31 03:10:39	-52.8032	-40.1982	13.3693	102.797	1.44253	33.8065	3.8	10.6167
2011-12-31 03:11:40	-52.8036	-40.1936	13.3674	102.71	1.39806	33.8056	3.78469	10.6168
2011-12-31 03:12:40	-52.8038	-40.189	13.3713	102.697	1.39156	33.8042	3.77681	10.617
2011-12-31 03:13:41	-52.8041	-40.1844	13.3651	102.767	1.42726	33.8067	3.8	10.6172
2011-12-31 03:14:41	-52.8044	-40.1799	13.3631	102.827	1.45864	33.806	3.82537	10.6174
2011-12-31 03:15:42	-52.8047	-40.1753	13.3571	102.612	1.34787	33.8049	3.78	10.6177
2011-12-31 03:16:42	-52.8051	-40.1707	13.3575	102.603	1.34328	33.806	3.77709	10.618
2011-12-31 03:17:43	-52.8054	-40.1661	13.354	102.62	1.35184	33.8061	3.78802	10.6182
2011-12-31 03:18:43	-52.8057	-40.1616	13.3633	102.67	1.37789	33.8069	3.77903	10.6184
2011-12-31 03:19:43	-52.806	-40.1571	13.3635	102.632	1.35828	33.8048	3.77017	10.6187
2011-12-31 03:20:44	-52.8062	-40.1525	13.3636	102.704	1.39527	33.8079	3.78915	10.6189
2011-12-31 03:21:44	-52.8065	-40.1479	13.3605	102.613	1.34842	33.8064	3.76835	10.6191
2011-12-31 03:22:45	-52.8068	-40.1434	13.3718	102.801	1.44564	33.8073	3.79741	10.6193
2011-12-31 03:23:45	-52.8071	-40.1389	13.3687	102.667	1.37664	33.8076	3.76638	10.6195
2011-12-31 03:24:46	-52.8073	-40.1343	13.378	102.704	1.39576	33.8094	3.76	10.6197
2011-12-31 03:25:46	-52.8076	-40.1297	13.3765	102.738	1.41316	33.8035	3.77	10.6199
2011-12-31 03:26:47	-52.8079	-40.1251	13.3764	102.672	1.37955	33.809	3.75626	10.6201
2011-12-31 03:27:47	-52.8082	-40.1205	13.3727	102.709	1.3983	33.8072	3.76721	10.6205
2011-12-31 03:28:48	-52.8084	-40.1159	13.3709	102.576	1.32995	33.808	3.742	10.621
2011-12-31 03:29:48	-52.8087	-40.1114	13.3699	102.651	1.36827	33.8083	3.75101	10.6214
2011-12-31 03:30:48	-52.8089	-40.1067	13.3783	102.757	1.42355	33.8063	3.77	10.6218
2011-12-31 03:31:49	-52.8091	-40.102	13.3764	102.794	1.44233	33.8085	3.77843	10.6222
2011-12-31 03:32:49	-52.8094	-40.0973	13.3778	102.763	1.42629	33.8104	3.76655	10.6226
2011-12-31 03:33:50	-52.8098	-40.0928	13.3806	102.739	1.41463	33.8096	3.76	10.6232
2011-12-31 03:34:50	-52.8101	-40.0883	13.3799	102.829	1.46095	33.8069	3.78682	10.6234
2011-12-31 03:35:51	-52.8104	-40.0837	13.3956	102.918	1.50656	33.806	3.77829	10.6224
2011-12-31 03:36:51	-52.8107	-40.0792	13.3979	102.878	1.48585	33.8047	3.76498	10.6213
2011-12-31 03:37:51	-52.811	-40.0746	13.3944	102.781	1.43557	33.8075	3.7459	10.6204
2011-12-31 03:38:52	-52.8113	-40.0701	13.3919	102.951	1.5228	33.8092	3.79033	10.6193
2011-12-31 03:39:52	-52.8116	-40.0655	13.397	102.889	1.49066	33.8079	3.77	10.6183
2011-12-31 03:40:53	-52.8119	-40.061	13.3944	102.766	1.42762	33.806	3.74645	10.6172
2011-12-31 03:41:53	-52.8121	-40.0565	13.4026	102.742	1.41464	33.8072	3.72058	10.6162
2011-12-31 03:42:54	-52.8125	-40.052	13.4019	102.614	1.34859	33.8077	3.68972	10.6153
2011-12-31 03:43:54	-52.8128	-40.0475	13.3995	102.466	1.27241	33.8066	3.66	10.6143
2011-12-31 03:44:55	-52.8132	-40.043	13.3984	102.44	1.25859	33.8123	3.65205	10.6133
2011-12-31 03:45:55	-52.8135	-40.0384	13.4014	102.478	1.27824	33.8112	3.66	10.6123
2011-12-31 03:46:56	-52.8138	-40.0339	13.4174	102.733	1.40921	33.8133	3.69169	10.6113
2011-12-31 03:47:56	-52.8141	-40.0293	13.4205	102.688	1.38615	33.8109	3.6748	10.6104
2011-12-31 03:48:56	-52.8144	-40.0248	13.4256	102.638	1.35995	33.8138	3.65415	10.6093
2011-12-31 03:49:57	-52.8147	-40.0202	13.4215	102.621	1.3514	33.8127	3.66322	10.6083
2011-12-31 03:50:57	-52.815	-40.0155	13.4264	102.607	1.34388	33.8138	3.64245	10.6072
2011-12-31 03:51:58	-52.8152	-40.011	13.4273	102.634	1.35728	33.817	3.65166	10.6061
2011-12-31 03:52:58	-52.8155	-40.0064	13.4263	102.643	1.3614	33.8191	3.64936	10.6051
2011-12-31 03:53:59	-52.8157	-40.0018	13.4257	102.779	1.43058	33.8167	3.67925	10.6039
2011-12-31 03:54:59	-52.816	-39.9973	13.4271	102.679	1.37929	33.8167	3.65771	10.603
2011-12-31 03:55:59	-52.8163	-39.9927	13.4237	102.631	1.35431	33.8159	3.64204	10.6019
2011-12-31 03:57:00	-52.8167	-39.9882	13.4307	102.701	1.38993	33.8163	3.65	10.6009
2011-12-31 03:58:00	-52.817	-39.9838	13.4219	102.658	1.36739	33.8142	3.65	10.6
2011-12-31 03:59:01	-52.8173	-39.9792	13.4283	102.709	1.3938	33.8145	3.65543	10.599
2011-12-31 04:00:01	-52.8177	-39.9746	13.426	102.702	1.38948	33.8166	3.6544	10.598
2011-12-31 04:01:02	-52.8181	-39.9701	13.4381	102.787	1.43318	33.8173	3.65298	10.5971
2011-12-31 04:02:10	-52.8199	-39.968	13.4318	102.63	1.35261	33.8167	3.62	10.5983
2011-12-31 04:03:33	-52.8212	-39.9651	13.4304	102.557	1.3153	33.816	3.60336	10.5987
2011-12-31 04:04:48	-52.8202	-39.963	13.4343	102.781	1.42931	33.818	3.6488	10.5959
2011-12-31 04:05:49	-52.8192	-39.9631	13.4442	102.712	1.39389	33.8152	3.61939	10.5936
2011-12-31 04:06:49	-52.8189	-39.9643	13.4482	102.876	1.47674	33.8161	3.64	10.5925
2011-12-31 04:07:49	-52.8189	-39.9662	13.4569	102.775	1.42575	33.8177	3.61	10.5919
2011-12-31 04:08:49	-52.8186	-39.9686	13.466	102.857	1.46854	33.688	3.62795	10.5909
2011-12-31 04:09:50	-52.8184	-39.9717	13.4598	102.977	1.52866	33.8183	3.65426	10.59
2011-12-31 04:10:50	-52.818	-39.9752	13.466	102.926	1.50184	33.8176	3.62388	10.589
2011-12-31 04:11:51	-52.8177	-39.9788	13.4688	103.089	1.58535	33.8187	3.66	10.5882
2011-12-31 04:12:51	-52.8174	-39.9827	13.4722	103.089	1.58535	33.8167	3.66	10.5874
2011-12-31 04:13:52	-52.8171	-39.9869	13.4668	103.054	1.5673	33.8176	3.66	10.5866
2011-12-31 04:14:52	-52.8169	-39.9913	13.4671	102.984	1.53092	33.8182	3.64	10.5859
2011-12-31 04:15:53	-52.8166	-39.9956	13.4681	102.985	1.53129	33.8171	3.64	10.5851
2011-12-31 04:16:53	-52.8163	-40.0001	13.4627	102.784	1.42828	33.8164	3.60042	10.5844
2011-12-31 04:17:54	-52.816	-40.0046	13.4574	102.832	1.4529	33.8158	3.62059	10.5836
2011-12-31 04:18:54	-52.8157	-40.009	13.4641	102.954	1.51494	33.8151	3.6414	10.5829
2011-12-31 04:19:55	-52.8154	-40.0136	13.4645	102.834	1.4533	33.8159	3.60769	10.5821
2011-12-31 04:20:55	-52.8151	-40.0182	13.4654	102.877	1.47537	33.8159	3.62	10.5814
2011-12-31 04:21:56	-52.8148	-40.0229	13.4564	102.821	1.44617	33.8173	3.62	10.5806
2011-12-31 04:22:56	-52.8145	-40.0272	13.4676	102.954	1.51405	33.8193	3.63501	10.5798
2011-12-31 04:23:56	-52.8142	-40.0316	13.4619	102.878	1.47496	33.8222	3.62412	10.5791
2011-12-31 04:24:57	-52.8139	-40.0361	13.4657	102.848	1.45929	33.8212	3.60616	10.5784
2011-12-31 04:25:57	-52.8136	-40.0406	13.4596	102.989	1.53129	33.8178	3.65305	10.5776
2011-12-31 04:26:58	-52.8133	-40.0453	13.4558	102.921	1.49619	33.8187	3.64	10.5769
2011-12-31 04:27:58	-52.813	-40.0501	13.4568	102.96	1.51593	33.8165	3.64946	10.5761
2011-12-31 04:28:59	-52.8127	-40.0544	13.4673	103.093	1.5836	33.8161	3.65959	10.5753
2011-12-31 04:29:59	-52.8123	-40.0589	13.4624	103.112	1.59273	33.8161	3.67138	10.5749
2011-12-31 04:31:00	-52.8121	-40.0633	13.4631	103.19	1.63313	33.815	3.69563	10.5764
2011-12-31 04:32:00	-52.8117	-40.0677	13.462	103.221	1.64904	33.8129	3.7	10.5779
2011-12-31 04:33:01	-52.8114	-40.0722	13.4605	103.38	1.73074	33.8117	3.74592	10.5794
2011-12-31 04:34:01	-52.8111	-40.0769	13.4565	103.326	1.7039	33.8116	3.74	10.581
2011-12-31 04:35:01	-52.8108	-40.0817	13.4415	103.266	1.67323	33.8103	3.75	10.5826
2011-12-31 04:36:02	-52.8105	-40.0863	13.4127	103.046	1.56065	33.8098	3.74677	10.5841
2011-12-31 04:37:02	-52.8102	-40.0908	13.4009	102.895	1.48364	33.8096	3.73227	10.5856
2011-12-31 04:38:03	-52.8099	-40.0951	13.3927	102.708	1.38882	33.8092	3.70273	10.5871
2011-12-31 04:39:03	-52.8096	-40.0996	13.3831	102.805	1.43831	33.8088	3.74	10.5886
2011-12-31 04:40:04	-52.8092	-40.104	13.3992	102.846	1.45977	33.8128	3.72105	10.5902
2011-12-31 04:41:04	-52.8089	-40.1084	13.4091	102.891	1.48385	33.8136	3.72315	10.5917
2011-12-31 04:42:05	-52.8086	-40.1128	13.4022	102.964	1.52145	33.8144	3.75749	10.5932
2011-12-31 04:43:05	-52.8083	-40.1174	13.4042	102.981	1.53069	33.8144	3.75352	10.5947
2011-12-31 04:44:06	-52.808	-40.1222	13.4022	102.877	1.47783	33.8118	3.73228	10.5963
2011-12-31 04:45:06	-52.8078	-40.1267	13.403	102.89	1.4848	33.8133	3.73462	10.5974
2011-12-31 04:46:07	-52.8075	-40.1309	13.4081	102.979	1.53061	33.8132	3.74733	10.598
2011-12-31 04:47:07	-52.8072	-40.1353	13.3989	102.926	1.50337	33.8107	3.75	10.5986
2011-12-31 04:48:08	-52.8069	-40.1398	13.394	102.951	1.51639	33.8107	3.76807	10.5992
2011-12-31 04:49:08	-52.8067	-40.1443	13.3873	102.931	1.50568	33.8079	3.77	10.5997
2011-12-31 04:50:08	-52.8064	-40.1489	13.3883	102.933	1.50696	33.8118	3.7701	10.6001
2011-12-31 04:51:09	-52.8061	-40.1536	13.386	102.862	1.4705	33.8106	3.75188	10.6005
2011-12-31 04:52:09	-52.8058	-40.1583	13.387	102.946	1.51418	33.8119	3.77815	10.6009
2011-12-31 04:53:10	-52.8055	-40.1631	13.3823	102.979	1.53053	33.8104	3.79	10.6013
2011-12-31 04:54:10	-52.8053	-40.1678	13.3907	103.012	1.54772	33.8104	3.78623	10.6017
2011-12-31 04:55:11	-52.805	-40.1722	13.3834	102.916	1.4988	33.8099	3.77527	10.6022
2011-12-31 04:56:11	-52.8048	-40.1765	13.3843	102.908	1.49487	33.8097	3.77	10.6025
2011-12-31 04:57:12	-52.8044	-40.1809	13.3849	102.997	1.54045	33.8103	3.79	10.6031
2011-12-31 04:58:12	-52.8041	-40.1855	13.387	103.018	1.55123	33.8105	3.79	10.6035
2011-12-31 04:59:13	-52.8037	-40.19	13.3943	103.125	1.60593	33.8112	3.8	10.6041
2011-12-31 05:00:13	-52.8033	-40.1945	13.3857	102.998	1.54149	33.8118	3.78951	10.6046
2011-12-31 05:01:14	-52.8031	-40.1988	13.38	102.913	1.49786	33.81	3.78032	10.6053
2011-12-31 05:02:14	-52.8027	-40.2034	13.3832	102.988	1.5369	33.8103	3.79121	10.6064
2011-12-31 05:03:15	-52.8024	-40.208	13.3843	103.059	1.57352	33.811	3.80603	10.6075
2011-12-31 05:04:15	-52.8021	-40.2127	13.3842	103.055	1.5717	33.8104	3.80594	10.6087
2011-12-31 05:05:15	-52.8018	-40.2174	13.381	103.033	1.56054	33.8089	3.80614	10.6098
2011-12-31 05:06:16	-52.8015	-40.2221	13.3838	103.108	1.59958	33.8083	3.82	10.6109
2011-12-31 05:07:16	-52.8012	-40.2268	13.3853	102.92	1.50335	33.81	3.77	10.612
2011-12-31 05:08:17	-52.8009	-40.2314	13.3868	102.918	1.50259	33.8107	3.76991	10.6131
2011-12-31 05:09:17	-52.8006	-40.2361	13.3812	102.914	1.50071	33.8102	3.77764	10.6143
2011-12-31 05:10:18	-52.8003	-40.2408	13.3932	102.86	1.47388	33.8102	3.74444	10.6154
2011-12-31 05:11:18	-52.8001	-40.2455	13.3922	103.035	1.56392	33.8115	3.79051	10.6165
2011-12-31 05:12:19	-52.7998	-40.2499	13.3909	103.072	1.58323	33.8116	3.80052	10.6175
2011-12-31 05:13:19	-52.7996	-40.2543	13.3877	103.079	1.58729	33.8106	3.81502	10.6186
2011-12-31 05:14:20	-52.7985	-40.2574	13.3848	103.009	1.5512	33.8122	3.79329	10.6203
2011-12-31 05:15:20	-52.7968	-40.258	13.3922	103.065	1.58115	33.8115	3.8	10.6224
2011-12-31 05:16:20	-52.7967	-40.2597	13.3877	103.027	1.56176	33.8115	3.79601	10.6233
2011-12-31 05:17:21	-52.7977	-40.2597	13.3894	102.948	1.52152	33.8101	3.78	10.6232
2011-12-31 05:18:21	-52.7982	-40.2575	13.3901	102.981	1.53868	33.8093	3.79	10.6235
2011-12-31 05:19:22	-52.7988	-40.2547	13.3893	102.913	1.50361	33.8126	3.77347	10.6237
2011-12-31 05:20:22	-52.7999	-40.2518	13.3931	103.014	1.55557	33.8099	3.79	10.6235
2011-12-31 05:21:23	-52.8004	-40.2482	13.3842	102.974	1.53497	33.8104	3.79849	10.6237
2011-12-31 05:22:23	-52.8006	-40.2439	13.3732	102.878	1.48494	33.8103	3.79	10.6241
2011-12-31 05:23:24	-52.801	-40.2391	13.3769	102.851	1.47144	33.8068	3.78	10.6244
2011-12-31 05:24:24	-52.8012	-40.2342	13.3732	102.942	1.51837	33.8063	3.80926	10.6248
2011-12-31 05:25:24	-52.8014	-40.2295	13.3704	102.863	1.47752	33.8101	3.79148	10.6252
2011-12-31 05:26:25	-52.8017	-40.2247	13.3595	102.863	1.47786	33.8106	3.81584	10.6256
2011-12-31 05:27:25	-52.8019	-40.2201	13.348	102.707	1.3977	33.809	3.8	10.626
2011-12-31 05:28:25	-52.8021	-40.2153	13.3622	102.823	1.45728	33.8083	3.8	10.6264
2011-12-31 05:29:26	-52.8023	-40.2106	13.3598	102.733	1.41146	33.8084	3.78533	10.6269
2011-12-31 05:30:26	-52.8025	-40.206	13.3591	102.786	1.4388	33.8073	3.8	10.6273
2011-12-31 05:31:27	-52.8028	-40.2013	13.3612	102.729	1.40931	33.8098	3.78	10.6277
2011-12-31 05:32:27	-52.8031	-40.1967	13.36	102.803	1.44753	33.8098	3.8	10.6281
2011-12-31 05:33:28	-52.8034	-40.1921	13.3702	102.813	1.45326	33.8096	3.78817	10.6292
2011-12-31 05:34:28	-52.8037	-40.1875	13.3739	102.84	1.46758	33.8084	3.79081	10.6302
2011-12-31 05:35:29	-52.804	-40.183	13.373	102.884	1.49062	33.8086	3.8	10.6312
2011-12-31 05:36:29	-52.8043	-40.1784	13.366	102.818	1.45671	33.8085	3.79892	10.6323
2011-12-31 05:37:30	-52.8045	-40.1738	13.3686	102.808	1.45191	33.8046	3.79213	10.6331
2011-12-31 05:38:30	-52.8049	-40.1692	13.3721	102.853	1.47499	33.8068	3.79406	10.6339
2011-12-31 05:39:30	-52.8052	-40.1646	13.3661	102.821	1.45883	33.8099	3.8	10.6346
2011-12-31 05:40:31	-52.8055	-40.16	13.3643	102.758	1.42668	33.8097	3.78528	10.6355
2011-12-31 05:41:31	-52.8059	-40.1554	13.3677	102.76	1.42788	33.8086	3.78	10.6363
2011-12-31 05:42:32	-52.8062	-40.1508	13.3721	102.807	1.45208	33.8064	3.78	10.6371
2011-12-31 05:43:32	-52.8065	-40.1463	13.375	102.819	1.45876	33.8093	3.78	10.6378
2011-12-31 05:44:33	-52.8067	-40.1417	13.3789	102.859	1.47957	33.8105	3.7815	10.6387
2011-12-31 05:45:33	-52.8071	-40.1372	13.3895	102.908	1.50564	33.8111	3.77874	10.6395
2011-12-31 05:46:34	-52.8074	-40.1325	13.3893	102.944	1.52376	33.8081	3.78	10.6403
2011-12-31 05:47:34	-52.8077	-40.1279	13.3921	102.984	1.54492	33.8109	3.78639	10.6412
2011-12-31 05:48:35	-52.808	-40.1233	13.3908	102.773	1.4365	33.8104	3.74	10.6416
2011-12-31 05:49:35	-52.8083	-40.1186	13.3851	102.83	1.46528	33.812	3.75367	10.6415
2011-12-31 05:50:36	-52.8085	-40.114	13.3942	102.77	1.43466	33.81	3.7282	10.6414
2011-12-31 05:51:36	-52.8089	-40.1095	13.3976	102.844	1.47282	33.8131	3.74	10.6413
2011-12-31 05:52:36	-52.8092	-40.1049	13.3995	102.827	1.46407	33.813	3.72851	10.6412
2011-12-31 05:53:37	-52.8095	-40.1003	13.4048	102.76	1.42962	33.8109	3.70329	10.641
2011-12-31 05:54:37	-52.8098	-40.0957	13.4107	102.812	1.45635	33.8127	3.70491	10.6409
2011-12-31 05:55:38	-52.8101	-40.0912	13.41	102.794	1.44719	33.8138	3.70148	10.6408
2011-12-31 05:56:38	-52.8104	-40.0866	13.4038	102.751	1.42479	33.8134	3.70148	10.6407
2011-12-31 05:57:39	-52.8107	-40.082	13.4056	102.744	1.42097	33.811	3.69975	10.6406
2011-12-31 05:58:39	-52.811	-40.0773	13.4085	102.777	1.43825	33.8129	3.7	10.6404
2011-12-31 05:59:40	-52.8113	-40.0726	13.3971	102.658	1.37627	33.8111	3.68789	10.6403
2011-12-31 06:00:40	-52.8116	-40.0679	13.394	102.704	1.40111	33.8119	3.71	10.6448
2011-12-31 06:01:40	-52.8119	-40.0632	13.3985	102.655	1.37771	33.8122	3.68612	10.6516
2011-12-31 06:02:41	-52.8122	-40.0588	13.3964	102.61	1.35594	33.8116	3.67968	10.6584
2011-12-31 06:03:41	-52.8124	-40.0545	13.3989	102.623	1.36464	33.8113	3.68	10.6652
2011-12-31 06:04:42	-52.8127	-40.0499	13.4018	102.58	1.34386	33.8102	3.66679	10.6721
2011-12-31 06:05:42	-52.8129	-40.0453	13.4018	102.557	1.33338	33.8105	3.66	10.6789
2011-12-31 06:06:43	-52.8133	-40.0407	13.3963	102.478	1.29387	33.8121	3.64838	10.6856
2011-12-31 06:07:43	-52.8135	-40.0362	13.4027	102.456	1.28415	33.8147	3.63	10.6925
2011-12-31 06:08:44	-52.8138	-40.0317	13.4001	102.403	1.25809	33.8157	3.62	10.6993
2011-12-31 06:09:44	-52.8141	-40.0273	13.4172	102.455	1.28708	33.8119	3.60225	10.7061
2011-12-31 06:10:45	-52.8143	-40.0229	13.4235	102.623	1.37633	33.8144	3.63	10.713
2011-12-31 06:11:45	-52.8146	-40.0183	13.4288	102.719	1.42801	33.8168	3.63919	10.7198
2011-12-31 06:12:46	-52.8149	-40.0137	13.4296	102.899	1.52419	33.8212	3.68402	10.7266
2011-12-31 06:13:46	-52.8151	-40.0091	13.4336	102.905	1.52889	33.8228	3.68	10.7334
2011-12-31 06:14:46	-52.8155	-40.0044	13.4225	102.913	1.53496	33.8201	3.7	10.7401
2011-12-31 06:15:47	-52.8158	-39.9998	13.4062	102.855	1.5057	33.8209	3.71674	10.7469
2011-12-31 06:16:47	-52.8161	-39.9951	13.3916	102.659	1.40439	33.8212	3.7	10.7536
2011-12-31 06:17:48	-52.8164	-39.9904	13.3849	102.537	1.3415	33.8168	3.68144	10.7604
2011-12-31 06:18:48	-52.8168	-39.9859	13.3833	102.428	1.28613	33.8201	3.66	10.7671
2011-12-31 06:19:49	-52.8171	-39.9813	13.3701	102.268	1.20262	33.8175	3.64	10.7739
2011-12-31 06:20:49	-52.8175	-39.9767	13.3749	102.271	1.2055	33.8145	3.63124	10.7806
2011-12-31 06:21:50	-52.8178	-39.972	13.3874	102.517	1.33713	33.8166	3.66779	10.7873
2011-12-31 06:22:50	-52.8191	-39.9695	13.3984	102.582	1.37311	33.8162	3.65298	10.7934
2011-12-31 06:23:50	-52.8208	-39.9684	13.4084	102.598	1.38351	33.8135	3.65	10.7994
2011-12-31 06:24:51	-52.8211	-39.9661	13.4148	102.66	1.41773	33.8181	3.64481	10.8064
2011-12-31 06:25:51	-52.8203	-39.9647	13.4273	102.705	1.44376	33.8161	3.63	10.8146
2011-12-31 06:26:52	-52.8193	-39.9645	13.4297	102.726	1.45729	33.8158	3.63331	10.823
2011-12-31 06:27:52	-52.8187	-39.9656	13.4364	102.768	1.48193	33.8158	3.62723	10.8313
2011-12-31 06:28:53	-52.8187	-39.9678	13.4371	102.89	1.54888	33.8169	3.66	10.8392
2011-12-31 06:29:53	-52.8182	-39.9711	13.4378	102.668	1.4326	33.8167	3.60066	10.8476
2011-12-31 06:30:54	-52.8177	-39.9749	13.4499	102.913	1.56621	33.8165	3.64033	10.8562
2011-12-31 06:31:54	-52.8173	-39.9792	13.4482	102.938	1.58194	33.8173	3.65	10.8646
2011-12-31 06:32:55	-52.817	-39.9839	13.4556	103.01	1.62293	33.8178	3.65207	10.8731
2011-12-31 06:33:55	-52.8166	-39.9888	13.456	102.951	1.59347	33.8198	3.64	10.8816
2011-12-31 06:34:55	-52.8162	-39.9935	13.4619	103.128	1.6916	33.8192	3.6721	10.8901
2011-12-31 06:35:56	-52.8159	-39.9976	13.4613	103.078	1.66681	33.8206	3.66	10.8985
2011-12-31 06:36:56	-52.8157	-40.0016	13.4573	103.184	1.72658	33.8239	3.69742	10.9068
2011-12-31 06:37:57	-52.8154	-40.0056	13.4508	103.213	1.74454	33.8245	3.71623	10.9151
2011-12-31 06:38:57	-52.8152	-40.01	13.439	103.072	1.67032	33.8266	3.70441	10.9234
2011-12-31 06:39:58	-52.8149	-40.0145	13.4267	103.067	1.66967	33.8252	3.72238	10.9318
2011-12-31 06:40:58	-52.8146	-40.0191	13.4109	102.937	1.60135	33.8236	3.72	10.9402
2011-12-31 06:41:59	-52.8143	-40.0239	13.407	102.808	1.53386	33.8263	3.7	10.9487
2011-12-31 06:42:59	-52.814	-40.0285	13.4105	102.808	1.53609	33.8256	3.69151	10.9571
2011-12-31 06:44:00	-52.8137	-40.0332	13.4052	102.721	1.49065	33.8233	3.68	10.9655
2011-12-31 06:45:00	-52.8134	-40.038	13.4094	102.62	1.43735	33.8256	3.64641	10.974
2011-12-31 06:46:01	-52.813	-40.0429	13.4247	102.644	1.45322	33.8249	3.62563	10.9825
2011-12-31 06:47:01	-52.8127	-40.0477	13.4232	102.692	1.48131	33.8195	3.64	10.991
2011-12-31 06:48:02	-52.8124	-40.0521	13.4364	102.726	1.50276	33.8203	3.62605	10.9994
2011-12-31 06:49:02	-52.8121	-40.0564	13.4454	103.008	1.65995	33.8216	3.67586	11.0078
2011-12-31 06:50:02	-52.8118	-40.0608	13.4636	103.24	1.79044	33.8198	3.7	11.0162
2011-12-31 06:51:03	-52.8115	-40.0652	13.4574	103.242	1.79397	33.8175	3.71754	11.0245
2011-12-31 06:52:03	-52.8113	-40.0696	13.4564	103.016	1.67161	33.817	3.66098	11.0329
2011-12-31 06:53:04	-52.8109	-40.0738	13.4497	102.923	1.62274	33.816	3.65059	11.0413
2011-12-31 06:54:04	-52.8107	-40.0782	13.4459	103.007	1.67118	33.818	3.67691	11.0497
2011-12-31 06:55:05	-52.8104	-40.0826	13.4466	102.926	1.62888	33.8185	3.66	11.058
2011-12-31 06:56:05	-52.8101	-40.0872	13.4513	102.885	1.60887	33.8163	3.63983	11.0665
2011-12-31 06:57:06	-52.8099	-40.0919	13.4544	102.99	1.66945	33.8179	3.66	11.0748
2011-12-31 06:58:06	-52.8096	-40.0965	13.4493	102.875	1.60756	33.8204	3.64	11.0833
2011-12-31 06:59:07	-52.8093	-40.1011	13.4516	102.948	1.6502	33.8197	3.65	11.0917
2011-12-31 07:00:07	-52.809	-40.1058	13.4586	103.04	1.7046	33.8211	3.6638	11.1001
2011-12-31 07:01:07	-52.8087	-40.1102	13.4596	103.042	1.708	33.8203	3.66	11.1085
2011-12-31 07:02:08	-52.8085	-40.1146	13.4567	102.936	1.65105	33.8185	3.64	11.1168
2011-12-31 07:03:08	-52.8082	-40.1191	13.4583	102.9	1.63347	33.8186	3.63	11.1252
2011-12-31 07:04:09	-52.808	-40.1236	13.4555	102.97	1.67447	33.819	3.65048	11.1336
2011-12-31 07:05:09	-52.8077	-40.128	13.4594	103.006	1.69738	33.8197	3.65148	11.1414
2011-12-31 07:06:10	-52.8074	-40.1323	13.4545	103.071	1.73596	33.8205	3.67727	11.1488
2011-12-31 07:07:10	-52.8072	-40.1365	13.4525	103.093	1.75046	33.8174	3.69	11.1562
2011-12-31 07:08:11	-52.807	-40.1408	13.4546	103.23	1.82989	33.8169	3.72	11.1637
2011-12-31 07:09:11	-52.8067	-40.1452	13.4503	103.171	1.79879	33.8169	3.70989	11.1712
2011-12-31 07:10:11	-52.8064	-40.1496	13.4381	103.067	1.74199	33.8164	3.70592	11.1787
2011-12-31 07:11:12	-52.8062	-40.1541	13.4405	103.072	1.74713	33.8149	3.70673	11.1861
2011-12-31 07:12:12	-52.8059	-40.1587	13.4374	103.012	1.71535	33.8148	3.6954	11.1936
2011-12-31 07:13:13	-52.8057	-40.1633	13.4375	103.296	1.87845	33.8138	3.76728	11.201
2011-12-31 07:14:13	-52.8054	-40.1678	13.4354	103.253	1.8562	33.8163	3.76058	11.2085
2011-12-31 07:15:14	-52.8051	-40.1725	13.4236	103.095	1.76862	33.8133	3.73942	11.216
2011-12-31 07:16:14	-52.8047	-40.1771	13.4155	103.047	1.74287	33.8149	3.74	11.2235
2011-12-31 07:17:14	-52.8045	-40.1815	13.4225	103.094	1.77191	33.813	3.73804	11.231
2011-12-31 07:18:15	-52.8042	-40.1859	13.4185	103.178	1.82221	33.8128	3.76437	11.2385
2011-12-31 07:19:15	-52.8039	-40.1903	13.4245	103.232	1.85529	33.8133	3.77	11.2459
2011-12-31 07:20:16	-52.8036	-40.1947	13.4148	103.158	1.81512	33.8114	3.76541	11.2534
2011-12-31 07:21:16	-52.8033	-40.1991	13.4142	103.24	1.8643	33.8117	3.79	11.2603
2011-12-31 07:22:17	-52.803	-40.2036	13.4113	103.273	1.88482	33.8134	3.8	11.2667
2011-12-31 07:23:17	-52.8027	-40.2083	13.4175	103.14	1.81076	33.8136	3.76	11.2731
2011-12-31 07:24:18	-52.8024	-40.213	13.4203	103.238	1.86929	33.8107	3.78	11.2794
2011-12-31 07:25:18	-52.8021	-40.2177	13.4163	103.185	1.84022	33.8135	3.77	11.2857
2011-12-31 07:26:18	-52.8019	-40.2224	13.4208	103.205	1.85441	33.8113	3.77	11.292
2011-12-31 07:27:19	-52.8016	-40.2272	13.4193	103.257	1.88646	33.8123	3.78878	11.2983
2011-12-31 07:28:19	-52.8013	-40.232	13.4127	103.144	1.82288	33.813	3.77	11.3046
2011-12-31 07:29:20	-52.801	-40.2367	13.4151	103.228	1.87283	33.8124	3.7826	11.311
2011-12-31 07:30:20	-52.8007	-40.2414	13.4196	103.287	1.90979	33.8126	3.79657	11.3173
2011-12-31 07:31:21	-52.8004	-40.2462	13.4068	103.19	1.85505	33.8127	3.79	11.3237
2011-12-31 07:32:21	-52.8001	-40.2509	13.4133	103.23	1.88	33.811	3.79	11.33
2011-12-31 07:33:22	-52.8005	-40.2549	13.4093	103.153	1.83669	33.8127	3.77	11.3357
2011-12-31 07:34:22	-52.8011	-40.2579	13.413	103.083	1.79867	33.8095	3.756	11.3416
2011-12-31 07:35:22	-52.7998	-40.2585	13.4093	103.135	1.8313	33.8115	3.77	11.3506
2011-12-31 07:36:23	-52.7992	-40.2559	13.4108	103.11	1.82023	33.8128	3.77115	11.3597
2011-12-31 07:37:23	-52.7995	-40.2517	13.4083	103.102	1.81778	33.8126	3.76971	11.3684
2011-12-31 07:38:24	-52.7998	-40.2473	13.4181	103.211	1.88413	33.813	3.77929	11.3771
2011-12-31 07:39:24	-52.8002	-40.2428	13.4184	103.216	1.89017	33.813	3.78151	11.3859
2011-12-31 07:40:25	-52.8005	-40.2382	NaN	NaN	NaN	33.8118	3.78	11.3946
2011-12-31 07:41:25	-52.8008	-40.2337	13.4082	103.112	1.834	33.8125	3.77323	11.4034
2011-12-31 07:42:26	-52.8012	-40.2293	13.4106	103.276	1.93366	33.8114	3.81413	11.412
2011-12-31 07:43:26	-52.8015	-40.2248	13.4092	103.005	1.77691	33.8099	3.75009	11.4208
2011-12-31 07:44:26	-52.8018	-40.2203	13.3994	102.975	1.76139	33.8113	3.75871	11.4295
2011-12-31 07:45:27	-52.8021	-40.2159	13.3886	102.889	1.71291	33.8097	3.7565	11.4383
2011-12-31 07:46:27	-52.8025	-40.2115	13.3937	102.983	1.7709	33.8091	3.77266	11.447
2011-12-31 07:47:28	-52.8027	-40.207	13.3884	102.96	1.75969	33.8093	3.77834	11.4558
2011-12-31 07:48:28	-52.8031	-40.2024	13.3771	102.855	1.70006	33.8109	3.77088	11.4646
2011-12-31 07:49:29	-52.8033	-40.1979	13.3835	103.06	1.82394	33.8121	3.80988	11.4734
2011-12-31 07:50:29	-52.8037	-40.1934	13.379	102.926	1.74691	33.8128	3.78804	11.4814
2011-12-31 07:51:29	-52.804	-40.1889	13.3738	102.971	1.77564	33.8109	3.80191	11.4891
2011-12-31 07:52:30	-52.8043	-40.1844	13.38	102.808	1.68083	33.8115	3.75286	11.4968
2011-12-31 07:53:30	-52.8046	-40.1799	13.3824	102.935	1.75859	33.8098	3.77625	11.5045
2011-12-31 07:54:31	-52.8049	-40.1755	13.388	103.013	1.80807	33.8108	3.78954	11.5122
2011-12-31 07:55:31	-52.8052	-40.1711	13.3753	102.827	1.69826	33.8097	3.76448	11.5199
2011-12-31 07:56:32	-52.8055	-40.1666	13.3793	102.788	1.67701	33.8122	3.7471	11.5276
2011-12-31 07:57:32	-52.8057	-40.1622	13.3754	102.703	1.6284	33.8115	3.73193	11.5354
2011-12-31 07:58:33	-52.806	-40.1576	13.3862	102.823	1.70281	33.8101	3.7432	11.5431
2011-12-31 07:59:33	-52.8063	-40.1531	13.3816	102.624	1.58474	33.814	3.7	11.5509
2011-12-31 08:00:34	-52.8065	-40.1485	13.3883	102.659	1.60818	33.8144	3.7	11.5586
2011-12-31 08:01:34	-52.8068	-40.144	13.3985	102.719	1.6466	33.8154	3.69502	11.5664
2011-12-31 08:02:35	-52.807	-40.1394	13.4004	102.765	1.6763	33.8131	3.7	11.5741
2011-12-31 08:03:35	-52.8072	-40.1347	13.406	102.686	1.63084	33.8138	3.67	11.5819
2011-12-31 08:04:35	-52.8076	-40.1301	13.4124	102.704	1.64372	33.8157	3.66	11.5896
2011-12-31 08:05:36	-52.8079	-40.1255	13.4184	102.64	1.60772	33.8156	3.63482	11.5973
2011-12-31 08:06:36	-52.8082	-40.1208	13.4119	102.534	1.54451	33.8171	3.62	11.6042
2011-12-31 08:07:37	-52.8085	-40.1161	13.4155	102.654	1.61928	33.8203	3.63661	11.6109
2011-12-31 08:08:37	-52.8088	-40.1114	13.4312	102.84	1.73409	33.8202	3.65274	11.6177
2011-12-31 08:09:38	-52.8082	-40.1075	13.4374	102.771	1.69451	33.8187	3.62	11.6253
2011-12-31 08:10:38	-52.8077	-40.1043	13.4406	102.884	1.76541	33.8164	3.64809	11.633
2011-12-31 08:11:39	-52.8091	-40.1029	13.4334	102.739	1.67883	33.8206	3.62	11.6392
2011-12-31 08:12:39	-52.81	-40.1044	13.4412	102.801	1.71821	33.8104	3.62	11.6461
2011-12-31 08:13:39	-52.8097	-40.107	13.4372	102.547	1.56523	33.8186	3.56811	11.6543
2011-12-31 08:14:40	-52.8092	-40.1098	13.4456	102.734	1.68214	33.8202	3.59731	11.6627
2011-12-31 08:15:40	-52.8088	-40.1118	13.4567	102.88	1.77434	33.8242	3.61351	11.6709
2011-12-31 08:16:41	-52.8086	-40.1128	13.474	103.027	1.86706	33.8216	3.61767	11.6788
2011-12-31 08:17:41	-52.8085	-40.1129	13.4763	102.921	1.80429	33.8218	3.58504	11.6865
2011-12-31 08:18:41	-52.8084	-40.1128	13.4627	102.971	1.83689	33.8224	3.62425	11.6941
2011-12-31 08:19:42	-52.8084	-40.1128	13.4727	103.036	1.87941	33.8228	3.62	11.7017
2011-12-31 08:20:42	-52.8085	-40.1129	13.4689	103.004	1.8623	33.8229	3.62	11.7093
2011-12-31 08:21:43	-52.8085	-40.1129	13.4714	102.962	1.83837	33.8232	3.60283	11.7169
[truncated: 18,675 more rows]

## Sheet: JR255A
Time	Latitude	Longitude	c(N2O)/nmol L-1	s(N2O)/%	F(N2O)/µmol m-2 d-1	Sea surface salinity	Sea surface temperature/°C	Wind speed/m s-1
2012-01-20 23:45:49	-52.5821	-57.3038	NaN	NaN	NaN	33.7286	9.39128	9.80526
2012-01-20 23:46:50	-52.5854	-57.3024	NaN	NaN	NaN	33.7358	9.28301	9.80723
2012-01-20 23:47:50	-52.5887	-57.3011	10.6037	97.3056	-1.19456	33.7481	9.19047	9.80919
2012-01-20 23:48:51	-52.5921	-57.2998	10.6267	97.3068	-1.19471	33.7631	9.12777	9.81115
2012-01-20 23:49:51	-52.5954	-57.2985	10.6584	97.2595	-1.21665	33.7701	9.03061	9.8131
2012-01-20 23:50:51	-52.5988	-57.2972	10.6888	97.2841	-1.20648	33.7852	8.95604	9.815
2012-01-20 23:51:52	-52.6021	-57.2959	10.7207	97.2584	-1.21877	33.7938	8.86373	9.81696
2012-01-20 23:52:52	-52.6054	-57.2946	10.744	97.1685	-1.25962	33.8104	8.77525	9.81892
2012-01-20 23:53:53	-52.6087	-57.2933	10.78	97.2664	-1.2168	33.8338	8.70792	9.82088
2012-01-20 23:54:53	-52.6121	-57.2921	10.822	97.4816	-1.12153	33.8536	8.65821	9.82284
2012-01-20 23:55:54	-52.6154	-57.2908	10.8538	97.6607	-1.04221	33.8766	8.62467	9.82478
2012-01-20 23:56:54	-52.6188	-57.2896	10.888	97.8467	-0.959723	33.8966	8.58665	9.82669
2012-01-20 23:57:55	-52.6222	-57.2884	10.9175	98.1254	-0.835722	33.9148	8.58718	9.82859
2012-01-20 23:58:55	-52.6256	-57.2872	10.9433	98.3669	-0.728502	33.9271	8.58828	9.83219
2012-01-20 23:59:56	-52.629	-57.286	10.9655	98.546	-0.648621	33.9342	8.58129	9.83228
2012-01-21 00:00:56	-52.6324	-57.2847	10.9825	98.6959	-0.581385	33.9388	8.58004	9.82908
2012-01-21 00:01:57	-52.6358	-57.2835	10.9927	98.7189	-0.570791	33.9427	8.56011	9.82566
2012-01-21 00:02:57	-52.6392	-57.2824	11.0031	98.6428	-0.60445	33.9438	8.51262	9.82222
2012-01-21 00:03:58	-52.6426	-57.2812	11.0163	98.6238	-0.612643	33.9408	8.4752	9.81879
2012-01-21 00:04:58	-52.6459	-57.28	11.0312	98.8923	-0.492726	33.9298	8.51501	9.81538
2012-01-21 00:05:59	-52.6493	-57.2789	11.0429	99.1092	-0.395937	33.9252	8.54629	9.81198
2012-01-21 00:06:59	-52.6527	-57.2778	11.0464	99.1131	-0.393974	33.9244	8.53837	9.80855
2012-01-21 00:08:00	-52.6561	-57.2766	11.0523	99.2874	-0.316287	33.9249	8.57256	9.80512
2012-01-21 00:09:00	-52.6595	-57.2755	11.0448	99.3053	-0.308096	33.9323	8.59557	9.80169
2012-01-21 00:10:01	-52.6629	-57.2744	11.0419	99.1946	-0.356984	33.9423	8.57083	9.79826
2012-01-21 00:11:01	-52.6663	-57.2733	11.0341	99.2907	-0.314085	33.9494	8.61586	9.79483
2012-01-21 00:12:02	-52.6697	-57.2722	11.0141	99.2226	-0.343987	33.9493	8.64687	9.7914
2012-01-21 00:13:02	-52.6731	-57.2711	11.0121	99.1437	-0.378645	33.9593	8.62812	9.78794
2012-01-21 00:14:03	-52.6765	-57.2701	11.002	98.9691	-0.455577	33.9618	8.60412	9.7845
2012-01-21 00:15:03	-52.68	-57.269	11.0015	98.9521	-0.462858	33.9478	8.60246	9.78103
2012-01-21 00:16:03	-52.6834	-57.2679	11.0018	98.9001	-0.485528	33.9372	8.58828	9.77757
2012-01-21 00:17:04	-52.6868	-57.2669	11.0265	99.1151	-0.390409	33.9348	8.58726	9.77411
2012-01-21 00:18:04	-52.6902	-57.2658	11.0209	99.0602	-0.414343	33.9388	8.58549	9.77066
2012-01-21 00:19:05	-52.6936	-57.2648	11.0229	99.1577	-0.371009	33.9459	8.60481	9.76721
2012-01-21 00:20:05	-52.6971	-57.2638	11.0139	99.2422	-0.333472	33.9564	8.64904	9.76375
2012-01-21 00:21:06	-52.7005	-57.2627	11.0097	99.3169	-0.300347	33.9691	8.67882	9.76028
2012-01-21 00:22:06	-52.7039	-57.2617	10.9957	99.189	-0.356328	33.9793	8.6762	9.75682
2012-01-21 00:23:07	-52.7074	-57.2607	10.9857	99.1294	-0.382241	33.9894	8.68299	9.75336
2012-01-21 00:24:07	-52.7108	-57.2597	10.9747	99.1462	-0.374526	33.9922	8.71461	9.74987
2012-01-21 00:25:08	-52.7142	-57.2586	10.9691	99.1623	-0.367223	33.9947	8.73402	9.7464
2012-01-21 00:26:08	-52.7177	-57.2576	10.9675	99.106	-0.39164	33.9958	8.72186	9.74294
2012-01-21 00:27:08	-52.7211	-57.2565	10.9647	98.9701	-0.450929	33.9962	8.69059	9.73946
2012-01-21 00:28:09	-52.7246	-57.2555	10.9654	99.0728	-0.405681	33.9962	8.71771	9.73598
2012-01-21 00:29:09	-52.728	-57.2545	10.9653	99.1009	-0.39311	33.9961	8.72628	9.7325
2012-01-21 00:30:10	-52.7315	-57.2535	10.9628	99.0853	-0.399636	33.9977	8.72784	9.72899
2012-01-21 00:31:10	-52.7349	-57.2525	10.9652	99.118	-0.385076	33.9995	8.73082	9.72549
2012-01-21 00:32:10	-52.7384	-57.2515	10.9591	99.0387	-0.419452	34.0002	8.72426	9.72203
2012-01-21 00:33:11	-52.7418	-57.2504	10.9652	99.0888	-0.397326	33.9975	8.72269	9.71856
2012-01-21 00:34:11	-52.7453	-57.2494	10.9618	99.0162	-0.428708	33.9942	8.71129	9.71508
2012-01-21 00:35:12	-52.7487	-57.2483	10.9596	99.0399	-0.418102	33.992	8.72428	9.7116
2012-01-21 00:36:12	-52.7521	-57.2472	10.9611	99.0349	-0.420023	33.9927	8.71888	9.70816
2012-01-21 00:37:13	-52.7555	-57.2459	10.9549	98.999	-0.435349	33.9958	8.72429	9.70483
2012-01-21 00:38:13	-52.7589	-57.2445	10.9542	98.9661	-0.449352	33.9935	8.71682	9.70149
2012-01-21 00:39:14	-52.7623	-57.2431	10.9563	98.981	-0.442594	33.9949	8.71564	9.69814
2012-01-21 00:40:14	-52.7657	-57.2417	10.9549	99.0004	-0.433884	33.9975	8.72339	9.69478
2012-01-21 00:41:14	-52.7692	-57.2403	10.9541	99.0126	-0.428278	34.0012	8.72789	9.69141
2012-01-21 00:42:15	-52.7726	-57.2389	10.9583	99.0375	-0.417206	34.0024	8.72424	9.68805
2012-01-21 00:43:15	-52.7761	-57.2375	10.9568	99.0445	-0.413895	34.0041	8.72922	9.68468
2012-01-21 00:44:16	-52.7795	-57.2361	10.9555	99.0816	-0.397524	34.0052	8.7425	9.68135
2012-01-21 00:45:16	-52.7828	-57.2348	10.9589	99.1611	-0.362853	34.0067	8.75564	9.67803
2012-01-21 00:46:17	-52.7862	-57.2333	10.9557	99.176	-0.356154	34.0091	8.76728	9.67474
2012-01-21 00:47:17	-52.7896	-57.2319	10.9448	99.0656	-0.403625	34.0125	8.76379	9.67143
2012-01-21 00:48:17	-52.793	-57.2305	10.947	99.234	-0.330601	34.0159	8.80478	9.66809
2012-01-21 00:49:18	-52.7964	-57.2291	10.9454	99.3621	-0.275066	34.0192	8.84396	9.66476
2012-01-21 00:50:18	-52.7998	-57.2277	10.9496	99.3813	-0.266619	34.0217	8.83797	9.66144
2012-01-21 00:51:19	-52.8032	-57.2264	10.9362	99.2742	-0.312571	34.0231	8.84148	9.65812
2012-01-21 00:52:19	-52.8065	-57.225	10.9348	99.2307	-0.331117	34.0235	8.83278	9.65482
2012-01-21 00:53:20	-52.8099	-57.2237	10.9271	99.162	-0.36043	34.0235	8.83328	9.65151
2012-01-21 00:54:20	-52.8133	-57.2223	10.9183	99.0073	-0.426745	34.0246	8.81273	9.6482
2012-01-21 00:55:21	-52.8167	-57.221	10.9121	98.8752	-0.483294	34.0251	8.79227	9.64487
2012-01-21 00:56:21	-52.8201	-57.2196	10.9085	98.8301	-0.502365	34.0253	8.78884	9.64145
2012-01-21 00:57:21	-52.8235	-57.2182	10.918	98.9025	-0.47096	34.0249	8.78454	9.6379
2012-01-21 00:58:22	-52.8269	-57.2169	10.9234	98.9491	-0.450643	34.0251	8.78337	9.63434
2012-01-21 00:59:22	-52.8303	-57.2155	NaN	NaN	NaN	34.0249	8.78296	9.63079
2012-01-21 01:00:23	-52.8336	-57.2141	NaN	NaN	NaN	34.0246	8.77078	9.62724
2012-01-21 01:01:23	-52.837	-57.2128	10.9302	98.8777	-0.480332	34.0251	8.74563	9.6237
2012-01-21 01:02:24	-52.8404	-57.2114	10.9274	98.7939	-0.515865	34.025	8.72966	9.62015
2012-01-21 01:03:24	-52.8438	-57.21	10.9375	98.8272	-0.501317	34.0228	8.7132	9.61663
2012-01-21 01:04:25	-52.8471	-57.2087	10.9477	98.8883	-0.47491	34.0203	8.70434	9.6131
2012-01-21 01:05:25	-52.8505	-57.2072	10.9626	99.0516	-0.404853	34.0197	8.71199	9.60955
2012-01-21 01:06:26	-52.8539	-57.2058	10.9752	99.1673	-0.355206	34.0202	8.71147	9.60599
2012-01-21 01:07:26	-52.8574	-57.2044	10.9778	99.166	-0.355523	34.0214	8.70382	9.60243
2012-01-21 01:08:26	-52.8608	-57.203	10.9877	99.2291	-0.328385	34.0229	8.69683	9.59887
2012-01-21 01:09:27	-52.8642	-57.2016	10.9836	99.2435	-0.322043	34.0233	8.71106	9.5953
2012-01-21 01:10:27	-52.8676	-57.2001	10.9883	99.3021	-0.296879	34.0232	8.71585	9.59172
2012-01-21 01:11:28	-52.871	-57.1987	10.9954	99.3168	-0.290451	34.0226	8.70227	9.58814
2012-01-21 01:12:28	-52.8744	-57.1973	10.9982	99.1999	-0.33996	34.0199	8.663	9.58459
2012-01-21 01:13:29	-52.8778	-57.1959	10.9975	99.0329	-0.41115	34.0127	8.6193	9.58603
2012-01-21 01:14:29	-52.8812	-57.1945	11.0028	98.9074	-0.464838	33.9986	8.57346	9.58848
2012-01-21 01:15:30	-52.8846	-57.1931	11.0197	98.8915	-0.471972	33.9827	8.52879	9.59093
2012-01-21 01:16:30	-52.888	-57.1917	11.0208	98.7666	-0.525507	33.9735	8.49265	9.59339
2012-01-21 01:17:31	-52.8914	-57.1903	11.043	98.7838	-0.518572	33.9698	8.44247	9.59584
2012-01-21 01:18:31	-52.8948	-57.1889	11.0633	98.689	-0.559475	33.9665	8.36663	9.5983
2012-01-21 01:19:31	-52.8981	-57.1875	11.0751	98.4701	-0.653512	33.9679	8.27644	9.60071
2012-01-21 01:20:32	-52.9014	-57.1861	11.0882	98.3256	-0.715794	33.9718	8.20257	9.6031
2012-01-21 01:21:32	-52.9048	-57.1847	11.1259	98.4327	-0.670505	33.9747	8.1384	9.6055
2012-01-21 01:22:33	-52.9081	-57.1833	11.1389	98.3262	-0.716575	33.9782	8.07609	9.6079
2012-01-21 01:23:33	-52.9114	-57.1819	11.1691	98.3739	-0.696644	33.983	8.0138	9.61031
2012-01-21 01:24:34	-52.9148	-57.1806	11.1908	98.3775	-0.695567	33.9883	7.96002	9.61275
2012-01-21 01:25:34	-52.9182	-57.1792	11.2193	98.4888	-0.648272	33.9931	7.92035	9.6152
2012-01-21 01:26:35	-52.9216	-57.1779	11.2566	98.7365	-0.542279	33.9977	7.89685	9.61764
2012-01-21 01:27:35	-52.925	-57.1766	11.3009	99.025	-0.418699	34.0023	7.86717	9.62006
2012-01-21 01:28:35	-52.9284	-57.1753	11.3109	98.9692	-0.442938	34.0048	7.82639	9.62248
2012-01-21 01:29:36	-52.9317	-57.174	11.3326	99.0098	-0.425776	34.0072	7.78479	9.6249
2012-01-21 01:30:36	-52.9351	-57.1728	11.3405	98.9917	-0.433778	34.0105	7.75995	9.62728
2012-01-21 01:31:37	-52.9384	-57.1715	11.3588	99.1051	-0.385194	34.0159	7.74745	9.62966
2012-01-21 01:32:37	-52.9417	-57.1703	11.3734	99.1442	-0.368294	34.0227	7.72279	9.62807
2012-01-21 01:33:38	-52.9451	-57.169	11.3991	99.313	-0.295537	34.0276	7.70588	9.62614
2012-01-21 01:34:38	-52.9484	-57.1678	11.3983	99.3322	-0.287142	34.0322	7.7115	9.62421
2012-01-21 01:35:39	-52.9517	-57.1665	11.42	99.6174	-0.164416	34.0386	7.73618	9.62226
2012-01-21 01:36:39	-52.9551	-57.1652	11.4329	99.8528	-0.0632284	34.0435	7.76866	9.62028
2012-01-21 01:37:39	-52.9585	-57.164	11.4445	100.058	0.0248644	34.0441	7.79689	9.6183
2012-01-21 01:38:40	-52.9619	-57.1628	11.4519	100.215	0.0924063	34.0433	7.82198	9.61629
2012-01-21 01:39:40	-52.9653	-57.1616	11.4424	100.199	0.0852844	34.0418	7.84048	9.61428
2012-01-21 01:40:41	-52.9687	-57.1604	11.4397	100.211	0.0905882	34.0379	7.85068	9.61228
2012-01-21 01:41:41	-52.972	-57.1592	11.4295	100.145	0.0619337	34.0329	7.85789	9.61029
2012-01-21 01:42:42	-52.9754	-57.1581	11.4212	100.045	0.019192	34.0306	7.85135	9.6083
2012-01-21 01:43:42	-52.9788	-57.1569	11.4187	100.082	0.0349756	34.0286	7.86734	9.60628
2012-01-21 01:44:42	-52.9822	-57.1558	11.4266	100.35	0.149973	34.026	7.92218	9.60425
2012-01-21 01:45:43	-52.9856	-57.1546	11.4136	100.384	0.164039	34.0144	7.96357	9.60222
2012-01-21 01:46:43	-52.989	-57.1535	11.4007	100.478	0.204269	34.0005	8.02229	9.6002
2012-01-21 01:47:44	-52.9924	-57.1524	11.3829	100.496	0.211666	33.9882	8.07136	9.59819
2012-01-21 01:48:44	-52.9958	-57.1513	11.358	100.331	0.14127	33.9743	8.0886	9.59615
2012-01-21 01:49:45	-52.9992	-57.1502	11.322	100.063	0.0268609	33.9599	8.10522	9.59411
2012-01-21 01:50:45	-53.0027	-57.1491	11.3031	99.8895	-0.0471572	33.9469	8.10474	9.59203
2012-01-21 01:51:45	-53.0061	-57.1479	11.2753	99.5665	-0.184937	33.9341	8.08539	9.58996
2012-01-21 01:52:46	-53.0096	-57.1468	11.2642	99.4201	-0.247294	33.9235	8.07346	9.58792
2012-01-21 01:53:46	-53.013	-57.1457	11.2541	99.3855	-0.261951	33.9162	8.09015	9.58587
2012-01-21 01:54:47	-53.0164	-57.1445	11.2453	99.2622	-0.314435	33.9118	8.07839	9.58384
2012-01-21 01:55:47	-53.0198	-57.1434	11.239	99.1624	-0.356847	33.9083	8.06649	9.58184
2012-01-21 01:56:48	-53.0231	-57.1423	11.2321	99.145	-0.364084	33.9047	8.07882	9.57985
2012-01-21 01:57:48	-53.0265	-57.1411	11.2247	99.1504	-0.361628	33.9024	8.0985	9.57784
2012-01-21 01:58:49	-53.0299	-57.14	11.2174	99.0795	-0.391627	33.9009	8.09664	9.57583
2012-01-21 01:59:49	-53.0333	-57.1388	11.2122	99.0295	-0.41278	33.8976	8.09602	9.57385
2012-01-21 02:00:49	-53.0366	-57.1377	11.2119	99.0919	-0.386034	33.8955	8.11473	9.57188
2012-01-21 02:01:50	-53.0399	-57.1366	11.2028	99.0484	-0.404367	33.8929	8.12427	9.56991
2012-01-21 02:02:50	-53.0433	-57.1355	11.2038	99.1416	-0.36458	33.8899	8.14885	9.56796
2012-01-21 02:03:51	-53.0466	-57.1343	11.1977	99.0755	-0.392509	33.8872	8.14517	9.56596
2012-01-21 02:04:51	-53.05	-57.1332	11.1943	99.0774	-0.391526	33.8852	8.15382	9.56396
2012-01-21 02:05:52	-53.0534	-57.132	11.1912	99.1159	-0.37502	33.884	8.17212	9.56194
2012-01-21 02:06:52	-53.0567	-57.131	11.1897	99.1318	-0.368148	33.883	8.18068	9.56
2012-01-21 02:07:52	-53.0601	-57.1298	11.1834	99.0535	-0.401196	33.883	8.17475	9.55803
2012-01-21 02:08:53	-53.0634	-57.1287	11.1785	99.0702	-0.393947	33.8824	8.19161	9.55602
2012-01-21 02:09:53	-53.0668	-57.1276	11.178	99.069	-0.394286	33.8809	8.19247	9.55401
2012-01-21 02:10:54	-53.0702	-57.1265	11.1763	99.054	-0.400506	33.8772	8.1937	9.55198
2012-01-21 02:11:54	-53.0736	-57.1254	NaN	NaN	NaN	33.8755	8.22466	9.54996
2012-01-21 02:12:55	-53.077	-57.1242	NaN	NaN	NaN	33.8733	8.22416	9.54807
2012-01-21 02:13:55	-53.0804	-57.1231	11.1698	99.1102	-0.376213	33.8697	8.22598	9.54627
2012-01-21 02:14:55	-53.0838	-57.122	11.1652	99.0792	-0.389216	33.8675	8.22973	9.54448
2012-01-21 02:15:56	-53.0871	-57.1208	11.1604	98.9362	-0.44959	33.8659	8.2026	9.54272
2012-01-21 02:16:56	-53.0904	-57.1197	11.1638	98.9215	-0.455632	33.8662	8.18915	9.54099
2012-01-21 02:17:57	-53.0938	-57.1185	11.1594	98.8119	-0.501817	33.8685	8.16869	9.53922
2012-01-21 02:18:57	-53.0971	-57.1173	11.1625	98.7054	-0.546692	33.8709	8.13074	9.53746
2012-01-21 02:19:58	-53.1005	-57.1162	11.1732	98.8232	-0.496739	33.8741	8.13668	9.53568
2012-01-21 02:20:58	-53.1039	-57.115	11.1784	98.9457	-0.444851	33.8725	8.15792	9.53393
2012-01-21 02:21:58	-53.1072	-57.1139	11.1865	98.9436	-0.445637	33.8651	8.13881	9.53218
2012-01-21 02:22:59	-53.1105	-57.1127	11.1757	98.8081	-0.50266	33.8645	8.12856	9.53041
2012-01-21 02:23:59	-53.1139	-57.1116	11.172	98.8192	-0.497782	33.8668	8.13997	9.52863
2012-01-21 02:25:00	-53.1173	-57.1104	11.1731	99.007	-0.418337	33.8637	8.18933	9.52683
2012-01-21 02:26:00	-53.1206	-57.1093	11.1841	99.1845	-0.343437	33.8574	8.21331	9.52506
2012-01-21 02:27:01	-53.124	-57.1082	11.1759	99.1872	-0.342146	33.8516	8.23397	9.52326
2012-01-21 02:28:01	-53.1273	-57.107	11.1678	99.138	-0.36294	33.8459	8.24041	9.52488
2012-01-21 02:29:02	-53.1307	-57.1059	11.1578	99.0948	-0.381344	33.8417	8.25417	9.52794
2012-01-21 02:30:02	-53.1341	-57.1047	NaN	NaN	NaN	33.8384	8.24194	9.531
2012-01-21 02:31:03	-53.1374	-57.1036	NaN	NaN	NaN	33.8345	8.23369	9.53406
2012-01-21 02:32:03	-53.1407	-57.1024	11.139	98.8478	-0.486314	33.8332	8.23131	9.53708
2012-01-21 02:33:04	-53.144	-57.1013	11.1341	98.8356	-0.491758	33.8347	8.23979	9.54011
2012-01-21 02:34:04	-53.1473	-57.1001	11.1424	98.9017	-0.464079	33.8396	8.2361	9.54314
2012-01-21 02:35:05	-53.1506	-57.099	11.1484	98.9193	-0.456948	33.8459	8.22558	9.54617
2012-01-21 02:36:05	-53.1539	-57.0978	NaN	NaN	NaN	33.8527	8.21902	9.54948
2012-01-21 02:37:05	-53.1572	-57.0964	NaN	NaN	NaN	33.8592	8.21445	9.55291
2012-01-21 02:38:06	-53.1605	-57.095	11.1498	98.8043	-0.506649	33.8598	8.18992	9.55635
2012-01-21 02:39:06	-53.1638	-57.0934	11.1661	98.9008	-0.466123	33.8585	8.17658	9.55981
2012-01-21 02:40:07	-53.167	-57.0918	11.1632	98.8881	-0.471772	33.8596	8.17899	9.56325
2012-01-21 02:41:07	-53.1703	-57.0903	11.162	98.8433	-0.491139	33.8625	8.1695	9.5667
2012-01-21 02:42:07	-53.1735	-57.0887	11.1662	98.8206	-0.501141	33.8669	8.1517	9.57014
2012-01-21 02:43:08	-53.1768	-57.0871	11.1758	98.8012	-0.509783	33.8697	8.1236	9.57358
2012-01-21 02:44:08	-53.1801	-57.0856	11.1702	98.6652	-0.568088	33.8667	8.10061	9.57703
2012-01-21 02:45:09	-53.1833	-57.084	11.1733	98.7511	-0.531893	33.8609	8.11806	9.58047
2012-01-21 02:46:09	-53.1866	-57.0825	11.1809	98.9124	-0.463434	33.8553	8.14476	9.58392
2012-01-21 02:47:10	-53.1899	-57.0809	11.1888	98.9473	-0.448904	33.8521	8.13543	9.58737
2012-01-21 02:48:10	-53.1932	-57.0794	11.1828	98.7895	-0.516624	33.8522	8.10566	9.59083
2012-01-21 02:49:11	-53.1965	-57.0778	11.1858	98.8144	-0.506346	33.8504	8.10678	9.59429
2012-01-21 02:50:11	-53.1997	-57.0763	11.1862	98.8234	-0.502847	33.848	8.10883	9.59774
2012-01-21 02:51:11	-53.203	-57.0748	11.1798	98.8288	-0.500823	33.8444	8.12599	9.60118
2012-01-21 02:52:12	-53.2063	-57.0733	11.1791	98.9109	-0.465997	33.8411	8.15143	9.60461
2012-01-21 02:53:12	-53.2095	-57.0717	11.1796	98.9358	-0.455642	33.84	8.15725	9.60806
2012-01-21 02:54:13	-53.2128	-57.0702	11.1729	98.8748	-0.482083	33.8395	8.15744	9.6115
2012-01-21 02:55:13	-53.2161	-57.0687	11.1681	98.817	-0.507203	33.838	8.15349	9.61493
2012-01-21 02:56:14	-53.2193	-57.0672	11.1607	98.7462	-0.537916	33.8375	8.15158	9.61835
2012-01-21 02:57:14	-53.2226	-57.0657	11.1565	98.7126	-0.552685	33.835	8.15186	9.62179
2012-01-21 02:58:15	-53.2258	-57.0642	11.1593	98.7665	-0.529863	33.8308	8.16	9.62522
2012-01-21 02:59:15	-53.2291	-57.0627	11.1627	98.7974	-0.516936	33.8267	8.161	9.62866
2012-01-21 03:00:16	-53.2323	-57.0611	11.163	98.8069	-0.513218	33.8235	8.16385	9.63208
2012-01-21 03:01:16	-53.2356	-57.0596	11.1535	98.6964	-0.561152	33.8213	8.15797	9.6355
2012-01-21 03:02:16	-53.2388	-57.0581	11.1488	98.5665	-0.617605	33.8188	8.13458	9.63894
2012-01-21 03:03:17	-53.2421	-57.0566	11.1489	98.4779	-0.656261	33.8163	8.10891	9.64238
2012-01-21 03:04:17	-53.2454	-57.0551	11.1595	98.5062	-0.644538	33.8115	8.09147	9.64582
2012-01-21 03:05:17	-53.2487	-57.0536	11.1651	98.5214	-0.638486	33.8022	8.08385	9.64926
2012-01-21 03:06:18	-53.2519	-57.0521	11.1575	98.4773	-0.657951	33.7923	8.09073	9.65271
2012-01-21 03:07:18	-53.2552	-57.0506	11.1663	98.6098	-0.601081	33.7863	8.10737	9.65599
2012-01-21 03:08:19	-53.2584	-57.0491	11.1641	98.6097	-0.601156	33.782	8.11348	9.65626
2012-01-21 03:09:19	-53.2617	-57.0476	11.1682	98.6714	-0.574452	33.7785	8.12026	9.65654
2012-01-21 03:10:20	-53.2649	-57.046	11.1615	98.639	-0.588477	33.7762	8.12756	9.65681
2012-01-21 03:11:20	-53.2682	-57.0445	11.1622	98.7078	-0.558756	33.7731	8.14678	9.65709
2012-01-21 03:12:21	-53.2714	-57.0429	11.1617	98.7334	-0.547699	33.7688	8.15584	9.65739
2012-01-21 03:13:21	-53.2745	-57.0414	11.1582	98.7276	-0.550249	33.7651	8.16286	9.65771
2012-01-21 03:14:22	-53.2777	-57.0398	11.1559	98.7139	-0.556171	33.7627	8.1647	9.65804
2012-01-21 03:15:22	-53.2808	-57.0383	11.1528	98.7062	-0.559552	33.7603	8.17079	9.65838
2012-01-21 03:16:23	-53.284	-57.0367	11.1542	98.7454	-0.542606	33.7574	8.17816	9.6587
2012-01-21 03:17:23	-53.2871	-57.0352	11.1471	98.6875	-0.567675	33.7553	8.1783	9.65901
2012-01-21 03:18:23	-53.2903	-57.0337	11.1388	98.628	-0.593427	33.7535	8.18169	9.65932
2012-01-21 03:19:24	-53.2935	-57.0321	11.1484	98.767	-0.533298	33.7516	8.19791	9.65964
2012-01-21 03:20:24	-53.2967	-57.0305	11.1485	98.8004	-0.518852	33.7501	8.20724	9.65994
2012-01-21 03:21:25	-53.2999	-57.0289	11.1436	98.7492	-0.541059	33.7494	8.20592	9.66024
2012-01-21 03:22:25	-53.3032	-57.0273	11.1411	98.7958	-0.520879	33.7487	8.22515	9.66053
2012-01-21 03:23:26	-53.3064	-57.0257	11.137	98.7688	-0.53263	33.7487	8.22833	9.66082
2012-01-21 03:24:26	-53.3096	-57.0241	NaN	NaN	NaN	33.749	8.21835	9.66113
2012-01-21 03:25:26	-53.3128	-57.0224	NaN	NaN	NaN	33.7495	8.21225	9.66143
2012-01-21 03:26:27	-53.316	-57.0209	11.1364	98.7152	-0.555905	33.7496	8.21482	9.66173
2012-01-21 03:27:27	-53.3192	-57.0193	11.1377	98.6992	-0.562898	33.7494	8.20697	9.66204
2012-01-21 03:28:28	-53.3224	-57.0176	11.142	98.7188	-0.554467	33.7489	8.20149	9.66237
2012-01-21 03:29:28	-53.3255	-57.0161	11.1459	98.7678	-0.533271	33.7477	8.20487	9.66271
2012-01-21 03:30:28	-53.3286	-57.0145	11.145	98.7525	-0.539937	33.7468	8.20286	9.66307
2012-01-21 03:31:29	-53.3318	-57.0129	11.1437	98.7129	-0.55715	33.7456	8.1958	9.66341
2012-01-21 03:32:29	-53.3349	-57.0112	11.1441	98.6947	-0.565086	33.744	8.19001	9.66376
2012-01-21 03:33:30	-53.3381	-57.0096	11.1454	98.6876	-0.568215	33.7422	8.18576	9.6641
2012-01-21 03:34:30	-53.3412	-57.008	11.1587	98.7642	-0.535124	33.7401	8.17552	9.66444
2012-01-21 03:35:31	-53.3444	-57.0064	11.1559	98.704	-0.561258	33.7383	8.16535	9.66477
2012-01-21 03:36:31	-53.3476	-57.0047	11.1516	98.6825	-0.570604	33.7373	8.1691	9.6651
2012-01-21 03:37:32	-53.3507	-57.0031	11.163	98.7893	-0.524353	33.7364	8.17018	9.66543
2012-01-21 03:38:32	-53.3539	-57.0015	11.1628	98.7885	-0.524743	33.7353	8.1702	9.66578
2012-01-21 03:39:33	-53.357	-56.9999	11.1678	98.8516	-0.497431	33.7343	8.17613	9.66613
2012-01-21 03:40:33	-53.3602	-56.9982	11.1621	98.8035	-0.518295	33.7329	8.17579	9.66648
2012-01-21 03:41:34	-53.3633	-56.9967	11.157	98.7903	-0.524017	33.7321	8.18397	9.66679
2012-01-21 03:42:34	-53.3665	-56.9953	11.1646	98.887	-0.482142	33.7313	8.19275	9.66706
2012-01-21 03:43:34	-53.3697	-56.9941	11.1628	98.8326	-0.505731	33.7304	8.18236	9.66733
2012-01-21 03:44:35	-53.3729	-56.9928	11.1596	98.7758	-0.530398	33.7298	8.17371	9.66761
2012-01-21 03:45:35	-53.376	-56.9915	11.157	98.7226	-0.553616	33.7301	8.16621	9.66904
2012-01-21 03:46:36	-53.3791	-56.9902	11.16	98.7688	-0.534008	33.7298	8.17219	9.67292
2012-01-21 03:47:36	-53.3823	-56.9889	11.1679	98.8993	-0.477725	33.7292	8.18955	9.67682
2012-01-21 03:48:37	-53.3855	-56.9877	11.1637	98.8814	-0.485863	33.7284	8.19473	9.68072
2012-01-21 03:49:37	-53.3886	-56.9864	11.1651	98.8455	-0.501827	33.7281	8.18034	9.68462
2012-01-21 03:50:38	-53.3918	-56.9851	11.1668	98.8695	-0.491778	33.7281	8.18303	9.68852
2012-01-21 03:51:38	-53.395	-56.9838	11.1686	98.9184	-0.470821	33.7275	8.19169	9.69242
2012-01-21 03:52:38	-53.3982	-56.9825	11.1708	98.9637	-0.451423	33.727	8.19756	9.69633
2012-01-21 03:53:39	-53.4014	-56.9812	11.1627	98.9053	-0.477175	33.7265	8.2	9.70026
2012-01-21 03:54:39	-53.4046	-56.9799	11.1651	98.9535	-0.456496	33.7257	8.20869	9.70419
2012-01-21 03:55:40	-53.4078	-56.9785	11.1689	99.0026	-0.435423	33.7254	8.21411	9.70812
2012-01-21 03:56:40	-53.411	-56.9772	11.1617	98.9247	-0.469765	33.7252	8.20835	9.71204
2012-01-21 03:57:41	-53.4142	-56.9759	11.1672	99.0063	-0.434451	33.7255	8.21805	9.71598
2012-01-21 03:58:41	-53.4174	-56.9745	11.1603	98.9939	-0.440163	33.7255	8.23079	9.71993
2012-01-21 03:59:42	-53.4206	-56.9732	11.1606	99.0258	-0.42651	33.7248	8.2387	9.72386
2012-01-21 04:00:42	-53.4238	-56.9719	11.1631	99.0406	-0.420372	33.7242	8.23805	9.72778
2012-01-21 04:01:42	-53.427	-56.9705	11.1663	99.129	-0.3819	33.7244	8.25506	9.73171
2012-01-21 04:02:43	-53.4302	-56.9691	11.1644	99.1098	-0.390621	33.7246	8.25444	9.73568
2012-01-21 04:03:45	-53.4335	-56.9677	11.1651	99.1467	-0.374664	33.7244	8.26149	9.73971
2012-01-21 04:04:48	-53.4368	-56.9663	11.1702	99.1876	-0.357018	33.7241	8.26029	9.74376
2012-01-21 04:05:49	-53.4401	-56.9649	11.1702	99.178	-0.361504	33.7237	8.25731	9.74776
2012-01-21 04:06:50	-53.4432	-56.9635	11.1639	99.1462	-0.37575	33.7238	8.26335	9.7517
2012-01-21 04:07:50	-53.4464	-56.9621	11.1638	99.1793	-0.36142	33.7236	8.27043	9.75562
2012-01-21 04:08:50	-53.4497	-56.9608	11.169	99.1839	-0.359694	33.7229	8.26047	9.75956
2012-01-21 04:09:51	-53.4529	-56.9594	11.1636	99.1258	-0.385589	33.7231	8.25781	9.76351
2012-01-21 04:10:51	-53.4561	-56.958	11.1643	99.1426	-0.378449	33.7226	8.25835	9.76745
2012-01-21 04:11:52	-53.4593	-56.9566	11.1592	99.1433	-0.378395	33.7229	8.26981	9.7714
2012-01-21 04:12:52	-53.4625	-56.9551	11.1706	99.245	-0.333725	33.7225	8.27019	9.77536
2012-01-21 04:13:52	-53.4658	-56.9537	11.1674	99.2065	-0.350995	33.7222	8.26864	9.77933
2012-01-21 04:14:53	-53.469	-56.9523	11.1658	99.1512	-0.375764	33.722	8.25684	9.7833
2012-01-21 04:15:53	-53.4722	-56.9509	11.166	99.1574	-0.373305	33.7229	8.25676	9.78725
2012-01-21 04:16:54	-53.4755	-56.9495	11.1639	99.1413	-0.380738	33.7224	8.25831	9.79121
2012-01-21 04:17:54	-53.4787	-56.9482	11.1719	99.1873	-0.360609	33.7227	8.25214	9.79512
2012-01-21 04:18:55	-53.4819	-56.947	11.1751	99.1868	-0.3611	33.7228	8.24375	9.79903
2012-01-21 04:19:55	-53.4851	-56.9457	11.1697	99.178	-0.365259	33.722	8.25236	9.80289
2012-01-21 04:20:56	-53.4883	-56.9444	11.1724	99.2399	-0.337948	33.7214	8.26027	9.80657
2012-01-21 04:21:56	-53.4915	-56.9431	11.1747	99.22	-0.347077	33.7222	8.25062	9.81025
2012-01-21 04:22:56	-53.4946	-56.9418	11.1711	99.2331	-0.341472	33.7214	8.26388	9.81391
2012-01-21 04:23:57	-53.4978	-56.9405	11.1672	99.195	-0.358695	33.7216	8.26388	9.8176
2012-01-21 04:24:57	-53.5011	-56.9392	11.1673	99.2439	-0.337139	33.7216	8.27716	9.82129
2012-01-21 04:25:58	-53.5042	-56.9379	11.174	99.3324	-0.297858	33.7224	8.28588	9.82497
2012-01-21 04:26:58	-53.5075	-56.9365	11.1769	99.2986	-0.3132	33.722	8.27116	9.82867
2012-01-21 04:27:58	-53.5107	-56.9352	11.1671	99.2667	-0.327644	33.722	8.28587	9.83235
2012-01-21 04:28:59	-53.5139	-56.9339	NaN	NaN	NaN	33.7223	8.28006	9.83607
2012-01-21 04:29:59	-53.5171	-56.9326	NaN	NaN	NaN	33.7228	8.28921	9.83973
2012-01-21 04:31:00	-53.5202	-56.9312	11.1811	99.3798	-0.277704	33.7223	8.28081	9.84341
2012-01-21 04:32:00	-53.5233	-56.9299	11.1747	99.362	-0.285818	33.7221	8.28997	9.84706
2012-01-21 04:33:00	-53.5264	-56.9286	11.1784	99.3809	-0.277562	33.7216	8.28691	9.85072
2012-01-21 04:34:01	-53.5296	-56.9273	11.1769	99.3653	-0.284739	33.7228	8.28617	9.85438
2012-01-21 04:35:01	-53.5328	-56.9259	11.1821	99.409	-0.265345	33.7236	8.28751	9.85809
2012-01-21 04:36:02	-53.536	-56.9246	11.18	99.4705	-0.237836	33.7237	8.30707	9.86179
2012-01-21 04:37:02	-53.5392	-56.9232	11.1851	99.5267	-0.212767	33.7245	8.31088	9.86547
2012-01-21 04:38:03	-53.5423	-56.9219	11.1824	99.5163	-0.217593	33.7249	8.31287	9.86914
2012-01-21 04:39:03	-53.5455	-56.9206	11.192	99.5958	-0.181919	33.7248	8.31023	9.87283
2012-01-21 04:40:04	-53.5488	-56.9193	11.1928	99.6567	-0.154639	33.7251	8.32597	9.87653
2012-01-21 04:41:04	-53.552	-56.9179	11.1945	99.6952	-0.137398	33.7257	8.33367	9.88026
2012-01-21 04:42:04	-53.5553	-56.9165	11.1908	99.6646	-0.151275	33.7255	8.33026	9.88399
2012-01-21 04:43:05	-53.5585	-56.9152	11.1978	99.662	-0.152555	33.7257	8.31319	9.8877
2012-01-21 04:44:05	-53.5617	-56.9138	11.1972	99.5548	-0.201113	33.7267	8.28278	9.89141
2012-01-21 04:45:06	-53.5648	-56.9124	11.1957	99.5235	-0.215377	33.7284	8.27761	9.8951
2012-01-21 04:46:06	-53.5681	-56.911	11.1978	99.4593	-0.244593	33.7298	8.25505	9.89882
2012-01-21 04:47:07	-53.5713	-56.9098	11.2031	99.4519	-0.24816	33.7307	8.239	9.90248
2012-01-21 04:48:07	-53.5745	-56.9087	NaN	NaN	NaN	33.7307	8.23164	9.90611
2012-01-21 04:49:08	-53.5777	-56.9075	NaN	NaN	NaN	33.7315	8.23035	9.90826
2012-01-21 04:50:08	-53.5809	-56.9064	11.2003	99.3442	-0.297341	33.7317	8.21661	9.90999
2012-01-21 04:51:08	-53.5842	-56.9053	11.2096	99.3977	-0.273185	33.7335	8.20955	9.91172
2012-01-21 04:52:09	-53.5874	-56.9041	11.2088	99.3851	-0.279027	33.7343	8.20847	9.91344
2012-01-21 04:53:09	-53.5906	-56.903	11.2043	99.3815	-0.280693	33.7347	8.21618	9.91517
2012-01-21 04:54:10	-53.5938	-56.9019	11.2078	99.4006	-0.272155	33.7346	8.21308	9.9169
2012-01-21 04:55:10	-53.597	-56.9008	NaN	NaN	NaN	33.7357	8.21948	9.91862
2012-01-21 04:56:11	-53.6003	-56.8997	NaN	NaN	NaN	33.7371	8.23323	9.92032
2012-01-21 04:57:11	-53.6035	-56.8985	11.2087	99.5003	-0.227047	33.7376	8.23825	9.92218
2012-01-21 04:58:12	-53.6067	-56.8974	11.1999	99.3864	-0.278923	33.7378	8.22692	9.92406
2012-01-21 04:59:12	-53.6099	-56.8963	11.2026	99.4115	-0.267617	33.7383	8.22704	9.92594
2012-01-21 05:00:12	-53.6131	-56.8952	11.1917	99.3642	-0.289239	33.7391	8.24336	9.92782
2012-01-21 05:01:13	-53.6162	-56.894	11.1912	99.4032	-0.271585	33.7402	8.25572	9.92973
2012-01-21 05:02:13	-53.6194	-56.8928	11.1947	99.3989	-0.273622	33.7414	8.24526	9.93161
2012-01-21 05:03:14	-53.6227	-56.8916	11.1933	99.3792	-0.282703	33.7425	8.24268	9.93351
2012-01-21 05:04:14	-53.6259	-56.8904	11.1876	99.3344	-0.303246	33.7434	8.24346	9.93602
2012-01-21 05:05:15	-53.6292	-56.8893	11.1876	99.3372	-0.302171	33.7444	8.24387	9.94018
2012-01-21 05:06:15	-53.6325	-56.8881	11.1849	99.2921	-0.323024	33.7455	8.23882	9.94434
2012-01-21 05:07:16	-53.6358	-56.8868	11.1909	99.2642	-0.336059	33.7464	8.21689	9.94851
2012-01-21 05:08:16	-53.639	-56.8856	11.19	99.3122	-0.314346	33.7475	8.23196	9.95266
2012-01-21 05:09:16	-53.6423	-56.8844	11.1893	99.3296	-0.306624	33.7499	8.23805	9.95683
2012-01-21 05:10:17	-53.6456	-56.8832	11.1923	99.3797	-0.28391	33.752	8.24297	9.96101
2012-01-21 05:11:17	-53.6488	-56.882	11.1905	99.3029	-0.319339	33.7537	8.22614	9.96517
2012-01-21 05:12:18	-53.6521	-56.8808	11.196	99.384	-0.282395	33.7553	8.23459	9.96931
2012-01-21 05:13:18	-53.6553	-56.8795	11.1896	99.3477	-0.299256	33.7556	8.23914	9.97348
2012-01-21 05:14:19	-53.6586	-56.8782	11.1908	99.3451	-0.300681	33.7563	8.23483	9.97764
2012-01-21 05:15:19	-53.6618	-56.877	11.1886	99.3158	-0.314371	33.7571	8.23213	9.98182
2012-01-21 05:16:20	-53.6651	-56.8757	11.1927	99.3175	-0.313825	33.7588	8.22154	9.98601
2012-01-21 05:17:20	-53.6684	-56.8744	11.1952	99.3369	-0.305154	33.7607	8.22	9.99023
2012-01-21 05:18:20	-53.6717	-56.8731	11.1969	99.3505	-0.299103	33.763	8.2192	9.99449
2012-01-21 05:19:21	-53.675	-56.8718	NaN	NaN	NaN	33.7659	8.22209	9.99874
2012-01-21 05:20:21	-53.6783	-56.8705	NaN	NaN	NaN	33.7672	8.23056	10.003
2012-01-21 05:21:22	-53.6816	-56.8693	11.1938	99.3719	-0.2899	33.7683	8.23068	10.0072
2012-01-21 05:22:22	-53.6849	-56.868	11.193	99.3586	-0.296312	33.7711	8.22894	10.0114
2012-01-21 05:23:23	-53.6882	-56.8667	11.19	99.305	-0.321328	33.7756	8.22134	10.0157
2012-01-21 05:24:23	-53.6915	-56.8654	11.195	99.3392	-0.305758	33.7788	8.21787	10.0199
2012-01-21 05:25:24	-53.6948	-56.8641	11.1975	99.3986	-0.278486	33.7814	8.22846	10.0242
2012-01-21 05:26:24	-53.6981	-56.8629	11.2011	99.4173	-0.270026	33.784	8.22427	10.0284
2012-01-21 05:27:24	-53.7014	-56.8616	11.2022	99.4219	-0.268101	33.7877	8.22122	10.0326
2012-01-21 05:28:25	-53.7047	-56.8604	11.2006	99.422	-0.268256	33.792	8.22402	10.0369
2012-01-21 05:29:25	-53.708	-56.8591	11.2033	99.4273	-0.266021	33.7964	8.21887	10.0411
2012-01-21 05:30:26	-53.7113	-56.8579	11.204	99.3695	-0.293109	33.8032	8.1991	10.0454
2012-01-21 05:31:26	-53.7146	-56.8566	11.1966	99.2638	-0.342504	33.8094	8.18556	10.0496
2012-01-21 05:32:27	-53.718	-56.8553	11.2016	99.2991	-0.326288	33.8141	8.18104	10.0539
2012-01-21 05:33:27	-53.7213	-56.854	11.2053	99.3536	-0.301154	33.8184	8.18513	10.0581
2012-01-21 05:34:27	-53.7246	-56.8527	11.2172	99.4728	-0.24578	33.8236	8.18703	10.0624
2012-01-21 05:35:28	-53.7279	-56.8514	11.2104	99.424	-0.268736	33.8292	8.18829	10.0666
2012-01-21 05:36:28	-53.7312	-56.8501	11.2149	99.4587	-0.25275	33.8342	8.18784	10.0709
2012-01-21 05:37:29	-53.7345	-56.8488	11.2139	99.4612	-0.25176	33.8383	8.19022	10.0751
2012-01-21 05:38:29	-53.7378	-56.8475	11.2142	99.4777	-0.24425	33.8457	8.1916	10.0794
2012-01-21 05:39:30	-53.741	-56.8463	11.2209	99.4871	-0.240006	33.8564	8.1765	10.0836
2012-01-21 05:40:30	-53.7443	-56.845	11.2102	99.3176	-0.319632	33.8632	8.15438	10.0878
2012-01-21 05:41:30	-53.7476	-56.8437	11.2122	99.2605	-0.346638	33.8676	8.13238	10.0921
2012-01-21 05:42:31	-53.7509	-56.8424	11.2233	99.3198	-0.319139	33.8732	8.12147	10.0963
2012-01-21 05:43:31	-53.7542	-56.8411	11.2332	99.4383	-0.263727	33.8782	8.12978	10.1006
2012-01-21 05:44:32	-53.7575	-56.8399	11.2412	99.5891	-0.19307	33.8815	8.15131	10.1048
2012-01-21 05:45:32	-53.7608	-56.8386	11.2476	99.6352	-0.171539	33.8826	8.14799	10.1091
2012-01-21 05:46:33	-53.7642	-56.8373	11.2495	99.6049	-0.185907	33.8822	8.13402	10.1133
2012-01-21 05:47:33	-53.7675	-56.836	11.2549	99.644	-0.167633	33.8836	8.13144	10.1176
2012-01-21 05:48:34	-53.7708	-56.8348	11.2536	99.6881	-0.146995	33.8866	8.14695	10.1218
2012-01-21 05:49:34	-53.774	-56.8336	11.2645	99.856	-0.0679237	33.8882	8.16499	10.126
2012-01-21 05:50:34	-53.7771	-56.8324	11.2642	99.9471	-0.0249689	33.888	8.19032	10.1302
2012-01-21 05:51:35	-53.7804	-56.8312	11.2567	99.9006	-0.0469169	33.8882	8.1954	10.1344
2012-01-21 05:52:35	-53.7836	-56.83	11.2561	99.9321	-0.0320771	33.8877	8.20502	10.1386
2012-01-21 05:53:36	-53.7869	-56.8288	11.2554	99.9939	-0.00288271	33.8871	8.22549	10.1428
2012-01-21 05:54:36	-53.7903	-56.8276	11.2502	99.9814	-0.00881082	33.8843	8.23674	10.147
2012-01-21 05:55:37	-53.7936	-56.8265	11.2478	99.9663	-0.0159808	33.8823	8.23904	10.1512
2012-01-21 05:56:37	-53.797	-56.8253	11.2437	99.94	-0.0284593	33.8831	8.2404	10.1555
2012-01-21 05:57:38	-53.8003	-56.8241	11.2392	99.8405	-0.0756479	33.8828	8.22342	10.1597
2012-01-21 05:58:38	-53.8036	-56.8229	11.2357	99.8435	-0.0743169	33.8822	8.23143	10.1639
2012-01-21 05:59:39	-53.8069	-56.8217	11.2312	99.7933	-0.0982197	33.8826	8.22899	10.1681
2012-01-21 06:00:39	-53.8102	-56.8206	11.2327	99.7107	-0.137556	33.8831	8.20253	10.1718
2012-01-21 06:01:39	-53.8134	-56.8194	11.2313	99.6486	-0.167204	33.8834	8.18821	10.1752
2012-01-21 06:02:40	-53.8167	-56.8182	11.2258	99.5408	-0.218617	33.8866	8.16955	10.1787
2012-01-21 06:03:40	-53.82	-56.8171	11.2308	99.5058	-0.235444	33.8911	8.14631	10.1821
2012-01-21 06:04:41	-53.8233	-56.8159	11.2333	99.5022	-0.23732	33.895	8.13976	10.1856
2012-01-21 06:05:41	-53.8264	-56.8147	11.2475	99.6145	-0.18391	33.8977	8.13518	10.189
2012-01-21 06:06:42	-53.8295	-56.8135	11.2556	99.6947	-0.145724	33.8988	8.13903	10.1924
2012-01-21 06:07:42	-53.8326	-56.8123	11.2506	99.6466	-0.168818	33.8993	8.13715	10.1958
2012-01-21 06:08:43	-53.8358	-56.8111	11.2562	99.6481	-0.168199	33.898	8.12375	10.1992
2012-01-21 06:09:43	-53.8389	-56.8099	11.2531	99.5978	-0.192387	33.8957	8.11811	10.2026
2012-01-21 06:10:44	-53.8421	-56.8087	11.2479	99.4062	-0.284228	33.8933	8.07699	10.206
2012-01-21 06:11:44	-53.8454	-56.8075	11.2502	99.332	-0.320008	33.8913	8.05088	10.2094
2012-01-21 06:12:45	-53.8486	-56.8063	11.2514	99.2862	-0.342173	33.8892	8.0348	10.2129
2012-01-21 06:13:45	-53.8518	-56.8051	11.2563	99.3749	-0.299817	33.8877	8.04591	10.2163
2012-01-21 06:14:45	-53.855	-56.8039	11.2613	99.4271	-0.274936	33.8886	8.04842	10.2197
2012-01-21 06:15:46	-53.8581	-56.8027	11.2637	99.3874	-0.294215	33.8911	8.03047	10.2231
2012-01-21 06:16:46	-53.8613	-56.8015	11.2669	99.3448	-0.314881	33.8934	8.01039	10.2265
2012-01-21 06:17:47	-53.8645	-56.8004	11.2638	99.1344	-0.416371	33.8984	7.95955	10.2299
2012-01-21 06:18:47	-53.8677	-56.7993	11.2654	99.0652	-0.449923	33.9075	7.93532	10.2333
2012-01-21 06:19:48	-53.8709	-56.7982	11.2733	99.3598	-0.308237	33.9195	7.9946	10.2367
2012-01-21 06:20:48	-53.8741	-56.7972	11.2921	99.537	-0.223036	33.9301	7.9965	10.2401
2012-01-21 06:21:49	-53.8773	-56.796	11.3178	99.5211	-0.230929	33.9289	7.93208	10.2437
2012-01-21 06:22:49	-53.8805	-56.7948	11.3222	99.2904	-0.34254	33.9284	7.85799	10.2474
2012-01-21 06:23:49	-53.8836	-56.7937	11.3123	98.975	-0.495273	33.9308	7.79452	10.2511
2012-01-21 06:24:50	-53.8868	-56.7926	11.3162	98.8342	-0.563731	33.9339	7.74363	10.2547
2012-01-21 06:25:50	-53.8899	-56.7915	11.3306	98.8127	-0.574612	33.9376	7.70266	10.2584
2012-01-21 06:26:51	-53.8931	-56.7904	11.3507	99.0836	-0.443738	33.9442	7.72798	10.2621
2012-01-21 06:27:51	-53.8962	-56.7894	11.367	99.4033	-0.289075	33.9488	7.77636	10.2656
2012-01-21 06:28:52	-53.8993	-56.7883	11.3856	99.6042	-0.191823	33.9552	7.78695	10.2691
2012-01-21 06:29:52	-53.9025	-56.7872	11.4011	99.9086	-0.0443115	33.9613	7.83208	10.2725
2012-01-21 06:30:53	-53.9056	-56.7861	11.3924	100.009	0.00448785	33.9677	7.88036	10.276
2012-01-21 06:31:53	-53.9088	-56.7851	11.3905	100.025	0.0119059	33.9559	7.88955	10.2795
2012-01-21 06:32:53	-53.912	-56.784	11.3902	99.9437	-0.0273426	33.9493	7.86904	10.283
2012-01-21 06:33:54	-53.9152	-56.783	11.3557	99.5497	-0.218873	33.9471	7.84325	10.2865
2012-01-21 06:34:54	-53.9183	-56.7818	11.3528	99.4386	-0.273093	33.9498	7.81952	10.2901
2012-01-21 06:35:55	-53.9215	-56.7806	11.3472	99.5447	-0.221585	33.9563	7.8612	10.2936
2012-01-21 06:36:55	-53.9247	-56.7795	11.3664	100.052	0.0253971	33.9575	7.95461	10.2971
2012-01-21 06:37:56	-53.9278	-56.7783	11.3667	100.336	0.163605	33.9546	8.0318	10.3007
2012-01-21 06:38:56	-53.9309	-56.777	11.371	100.388	0.188974	33.9376	8.03902	10.3042
2012-01-21 06:39:57	-53.9341	-56.7758	11.3499	100.014	0.00692528	33.9252	7.9877	10.3077
2012-01-21 06:40:57	-53.9372	-56.7746	11.3092	99.5478	-0.22073	33.9211	7.95789	10.3112
2012-01-21 06:41:57	-53.9404	-56.7734	11.2897	99.4091	-0.288564	33.9179	7.96712	10.3148
2012-01-21 06:42:58	-53.9435	-56.7722	11.2963	99.3827	-0.301712	33.9138	7.94314	10.3183
2012-01-21 06:43:58	-53.9467	-56.7709	11.3001	99.2618	-0.361113	33.9116	7.90238	10.3219
2012-01-21 06:44:59	-53.9499	-56.7697	11.3012	99.173	-0.404846	33.9118	7.87446	10.3254
2012-01-21 06:45:59	-53.953	-56.7685	11.3011	99.0477	-0.466579	33.9135	7.8393	10.329
2012-01-21 06:47:00	-53.9562	-56.7673	11.3035	98.9193	-0.529887	33.9158	7.79664	10.3325
2012-01-21 06:48:00	-53.9594	-56.766	11.3148	98.986	-0.497572	33.918	7.78943	10.3361
2012-01-21 06:49:01	-53.9625	-56.7648	11.3231	98.8907	-0.544765	33.9211	7.74076	10.3396
2012-01-21 06:50:01	-53.9656	-56.7634	11.3227	98.7157	-0.631232	33.9249	7.69368	10.3432
2012-01-21 06:51:02	-53.9686	-56.7622	11.3324	98.7429	-0.618254	33.9293	7.67479	10.3467
2012-01-21 06:52:02	-53.9717	-56.761	11.3473	98.7648	-0.607916	33.9333	7.64415	10.3502
2012-01-21 06:53:03	-53.9748	-56.7597	11.3625	98.8214	-0.580485	33.9396	7.62252	10.3537
2012-01-21 06:54:03	-53.978	-56.7584	11.3735	98.7532	-0.614575	33.9477	7.5746	10.3573
2012-01-21 06:55:04	-53.9812	-56.7571	11.3837	98.6833	-0.649534	33.9591	7.52898	10.3609
2012-01-21 06:56:04	-53.9844	-56.7558	11.3971	98.7328	-0.625532	33.9754	7.50976	10.3645
2012-01-21 06:57:04	-53.9875	-56.7545	11.4158	98.6567	-0.663675	33.9923	7.44143	10.3681
2012-01-21 06:58:05	-53.9907	-56.7532	11.442	98.7368	-0.62461	34.0028	7.39963	10.3716
2012-01-21 06:59:05	-53.9938	-56.7519	11.4621	98.8326	-0.577647	34.0102	7.37671	10.3752
2012-01-21 07:00:06	-53.997	-56.7506	11.4909	98.9911	-0.499603	34.0142	7.35181	10.3788
2012-01-21 07:01:06	-54.0002	-56.7493	11.5143	99.1216	-0.435256	34.0182	7.33046	10.3823
2012-01-21 07:02:07	-54.0033	-56.748	11.5401	99.2981	-0.348147	34.0232	7.31833	10.3871
2012-01-21 07:03:07	-54.0065	-56.7468	11.5571	99.3837	-0.305963	34.0279	7.29978	10.3924
2012-01-21 07:04:08	-54.0097	-56.7455	11.5722	99.5133	-0.241861	34.0309	7.29845	10.3977
2012-01-21 07:05:08	-54.013	-56.7443	11.5895	99.6809	-0.158697	34.0338	7.30401	10.403
2012-01-21 07:06:09	-54.0162	-56.743	11.5967	99.8521	-0.0736421	34.0366	7.33339	10.4084
2012-01-21 07:07:09	-54.0194	-56.7418	11.6038	99.9417	-0.0290386	34.0384	7.33833	10.4137
2012-01-21 07:08:09	-54.0226	-56.7405	11.6037	99.9577	-0.0211098	34.0454	7.34232	10.419
2012-01-21 07:09:10	-54.0258	-56.7392	11.6016	99.9774	-0.0112695	34.0476	7.35493	10.4242
2012-01-21 07:10:10	-54.029	-56.738	11.5997	99.8446	-0.0776637	34.0503	7.32176	10.4295
2012-01-21 07:11:11	-54.0323	-56.7368	11.6001	99.9052	-0.0473938	34.0532	7.33672	10.4349
2012-01-21 07:12:11	-54.0355	-56.7355	11.6027	99.8986	-0.0507772	34.0551	7.328	10.4402
2012-01-21 07:13:12	-54.0387	-56.7343	11.6062	99.8476	-0.0763896	34.0561	7.30567	10.4455
2012-01-21 07:14:12	-54.042	-56.733	11.6133	99.9086	-0.0458258	34.057	7.30639	10.4509
2012-01-21 07:15:12	-54.0452	-56.7317	11.6121	99.8984	-0.0510311	34.0576	7.3054	10.4562
2012-01-21 07:16:13	-54.0484	-56.7304	11.6136	99.824	-0.0884545	34.0578	7.28305	10.4615
2012-01-21 07:17:13	-54.0516	-56.7292	NaN	NaN	NaN	34.0579	7.28139	10.4667
2012-01-21 07:18:14	-54.0547	-56.7279	NaN	NaN	NaN	34.0565	7.267	10.4719
2012-01-21 07:19:14	-54.0578	-56.7267	11.6233	99.7954	-0.103176	34.056	7.26347	10.4771
2012-01-21 07:20:15	-54.061	-56.7254	11.625	99.851	-0.0752238	34.0563	7.27501	10.4823
2012-01-21 07:21:15	-54.0642	-56.7241	11.6299	99.909	-0.0459823	34.0559	7.27858	10.4876
2012-01-21 07:22:15	-54.0674	-56.7229	11.6344	99.9506	-0.0250038	34.0549	7.279	10.4929
2012-01-21 07:23:16	-54.0706	-56.7216	11.6296	99.9034	-0.0488858	34.0543	7.27648	10.4982
2012-01-21 07:24:16	-54.0738	-56.7203	11.6266	99.9031	-0.0491104	34.0548	7.28422	10.5035
2012-01-21 07:25:17	-54.077	-56.719	11.6322	99.8816	-0.0600264	34.054	7.26539	10.5088
2012-01-21 07:26:17	-54.0802	-56.7178	11.6248	99.758	-0.122862	34.054	7.24901	10.514
2012-01-21 07:27:18	-54.0833	-56.7165	NaN	NaN	NaN	34.0538	7.23904	10.5192
2012-01-21 07:28:18	-54.0865	-56.7152	NaN	NaN	NaN	34.0543	7.22584	10.5244
2012-01-21 07:29:19	-54.0896	-56.7139	11.6235	99.7125	-0.146332	34.0545	7.23767	10.5295
2012-01-21 07:30:19	-54.0927	-56.7126	11.6252	99.7417	-0.131607	34.0539	7.24034	10.5347
2012-01-21 07:31:20	-54.0958	-56.7113	11.626	99.7338	-0.135778	34.0534	7.23751	10.5399
2012-01-21 07:32:20	-54.0989	-56.7101	11.628	99.7679	-0.118484	34.0531	7.24245	10.545
2012-01-21 07:33:21	-54.1019	-56.7088	11.6343	99.8178	-0.0930898	34.0528	7.24209	10.55
2012-01-21 07:34:21	-54.1049	-56.7075	11.6288	99.8043	-0.100052	34.0536	7.25107	10.555
2012-01-21 07:35:21	-54.108	-56.7062	11.625	99.8054	-0.0995717	34.0544	7.25871	10.5601
2012-01-21 07:36:22	-54.1111	-56.7049	11.6269	99.8383	-0.082829	34.0551	7.26207	10.5653
2012-01-21 07:37:22	-54.1143	-56.7036	11.6271	99.8192	-0.092689	34.0562	7.25719	10.5703
2012-01-21 07:38:23	-54.1174	-56.7023	11.6291	99.7929	-0.106266	34.0567	7.24616	10.5744
2012-01-21 07:39:23	-54.1205	-56.701	11.623	99.767	-0.119607	34.0561	7.25226	10.5785
2012-01-21 07:40:24	-54.1236	-56.6996	11.6276	99.8507	-0.0767225	34.0558	7.26485	10.5827
2012-01-21 07:41:24	-54.1267	-56.6982	11.6224	99.8139	-0.0956989	34.0552	7.26775	10.5866
2012-01-21 07:42:25	-54.1297	-56.6969	11.6243	99.8165	-0.0944288	34.0543	7.26403	10.5903
2012-01-21 07:43:25	-54.1327	-56.6955	11.6249	99.8123	-0.0966089	34.054	7.2611	10.594
2012-01-21 07:44:25	-54.1358	-56.6942	11.625	99.7946	-0.105823	34.0542	7.25511	10.5977
2012-01-21 07:45:26	-54.1389	-56.6929	11.6225	99.8262	-0.0895596	34.0542	7.26847	10.6014
2012-01-21 07:46:26	-54.142	-56.6916	11.624	99.8838	-0.0599282	34.0538	7.28144	10.6051
2012-01-21 07:47:27	-54.1452	-56.6903	11.6227	99.8586	-0.0729613	34.0526	7.27879	10.6088
2012-01-21 07:48:27	-54.1483	-56.689	11.6219	99.8581	-0.0732775	34.0534	7.27949	10.6125
2012-01-21 07:49:28	-54.1514	-56.6877	11.619	99.8184	-0.0938706	34.0555	7.27422	10.6162
2012-01-21 07:50:28	-54.1544	-56.6864	11.6145	99.7449	-0.131923	34.0548	7.26577	10.6199
2012-01-21 07:51:29	-54.1575	-56.685	11.6122	99.7003	-0.155075	34.0537	7.25912	10.6236
2012-01-21 07:52:29	-54.1605	-56.6835	11.6179	99.7931	-0.107124	34.0526	7.27067	10.6273
2012-01-21 07:53:29	-54.1635	-56.6821	11.6146	99.7743	-0.116967	34.0527	7.27378	10.6311
2012-01-21 07:54:30	-54.1666	-56.6807	11.611	99.6556	-0.178614	34.0528	7.24986	10.6348
2012-01-21 07:55:30	-54.1697	-56.6792	11.6044	99.5449	-0.236165	34.0526	7.23546	10.6385
2012-01-21 07:56:31	-54.1728	-56.6778	11.6087	99.6149	-0.19997	34.0534	7.24484	10.6423
2012-01-21 07:57:31	-54.1759	-56.6764	11.5975	99.5462	-0.235776	34.0541	7.25167	10.646
2012-01-21 07:58:32	-54.1789	-56.675	11.6103	99.6364	-0.189045	34.0536	7.24632	10.6497
2012-01-21 07:59:32	-54.1819	-56.6736	11.6208	99.6784	-0.167314	34.0528	7.23355	10.6535
2012-01-21 08:00:32	-54.1849	-56.6722	11.6148	99.6173	-0.199271	34.0525	7.23078	10.6572
2012-01-21 08:01:33	-54.1878	-56.6707	11.6188	99.6829	-0.165183	34.0528	7.23926	10.6609
2012-01-21 08:02:33	-54.1908	-56.6694	11.6227	99.7095	-0.151419	34.0534	7.23675	10.6646
2012-01-21 08:03:34	-54.1938	-56.668	11.6221	99.6773	-0.168369	34.0537	7.22929	10.6683
2012-01-21 08:04:34	-54.1969	-56.6666	NaN	NaN	NaN	34.0537	7.21884	10.672
2012-01-21 08:05:35	-54.1999	-56.6651	NaN	NaN	NaN	34.0529	7.21055	10.6757
2012-01-21 08:06:35	-54.2029	-56.6637	11.6252	99.6166	-0.200411	34.0523	7.2062	10.6795
2012-01-21 08:07:35	-54.206	-56.6623	11.6228	99.6085	-0.204795	34.0514	7.20966	10.6832
2012-01-21 08:08:36	-54.209	-56.6609	11.633	99.6851	-0.164845	34.052	7.20727	10.6869
2012-01-21 08:09:36	-54.2121	-56.6595	11.6341	99.7262	-0.143396	34.0524	7.2161	10.6906
2012-01-21 08:10:37	-54.2153	-56.6582	11.6436	99.8317	-0.0881921	34.0523	7.22107	10.6944
2012-01-21 08:11:37	-54.2184	-56.6568	11.6349	99.7221	-0.14573	34.0524	7.21186	10.6983
2012-01-21 08:12:38	-54.2215	-56.6554	11.6386	99.7224	-0.145714	34.0527	7.2038	10.7023
2012-01-21 08:13:38	-54.2246	-56.654	11.6448	99.7414	-0.135829	34.0532	7.19579	10.7063
2012-01-21 08:14:38	-54.2275	-56.6526	11.6464	99.7337	-0.140007	34.0539	7.19034	10.7102
2012-01-21 08:15:39	-54.2306	-56.6513	11.6346	99.6052	-0.207681	34.0534	7.18261	10.7142
2012-01-21 08:16:39	-54.2336	-56.65	11.6371	99.5721	-0.225256	34.0532	7.16756	10.7181
2012-01-21 08:17:40	-54.2366	-56.6486	11.6384	99.5006	-0.2631	34.053	7.14489	10.7221
2012-01-21 08:18:40	-54.2396	-56.6473	11.6458	99.5131	-0.256729	34.0525	7.13158	10.726
2012-01-21 08:19:41	-54.2427	-56.6459	11.6488	99.4725	-0.278351	34.0518	7.11317	10.73
2012-01-21 08:20:41	-54.2457	-56.6446	11.6524	99.5195	-0.253745	34.0517	7.11679	10.734
2012-01-21 08:21:41	-54.2488	-56.6432	11.6547	99.5423	-0.241862	34.0506	7.117	10.7379
2012-01-21 08:22:42	-54.2518	-56.642	11.6697	99.7205	-0.147779	34.0498	7.1309	10.7419
2012-01-21 08:23:42	-54.2549	-56.6408	11.6781	99.7686	-0.122408	34.0501	7.12382	10.7458
2012-01-21 08:24:43	-54.2579	-56.6395	11.682	99.8319	-0.0890161	34.0491	7.13214	10.7497
2012-01-21 08:25:43	-54.2608	-56.6382	11.691	99.9356	-0.0340905	34.0479	7.13811	10.7536
2012-01-21 08:26:44	-54.2638	-56.637	11.6812	99.9031	-0.0513618	34.0471	7.15063	10.7575
2012-01-21 08:27:44	-54.2667	-56.6358	11.6827	99.9898	-0.00539263	34.046	7.17055	10.7614
2012-01-21 08:28:45	-54.2697	-56.6346	11.684	100.092	0.04897	34.0439	7.19531	10.7652
2012-01-21 08:29:45	-54.2727	-56.6335	11.6818	100.006	0.00318534	34.0428	7.17631	10.7691
2012-01-21 08:30:46	-54.2756	-56.6323	11.6772	99.9736	-0.0140296	34.0421	7.17922	10.7729
2012-01-21 08:31:46	-54.2786	-56.6312	11.6706	99.9433	-0.0301682	34.0429	7.18638	10.7768
2012-01-21 08:32:47	-54.2815	-56.6301	11.6657	99.8974	-0.0546095	34.0436	7.18554	10.7806
2012-01-21 08:33:47	-54.2845	-56.629	11.6589	99.8286	-0.0912776	34.0436	7.18302	10.7845
2012-01-21 08:34:47	-54.2875	-56.6279	11.6581	99.7887	-0.112609	34.0443	7.17318	10.7883
2012-01-21 08:35:48	-54.2905	-56.6268	11.6556	99.718	-0.150389	34.0453	7.15941	10.7922
2012-01-21 08:36:48	-54.2935	-56.6257	11.6559	99.7135	-0.1529	34.0453	7.1587	10.796
2012-01-21 08:37:49	-54.2964	-56.6247	11.6553	99.7611	-0.127533	34.0448	7.17284	10.7998
2012-01-21 08:38:49	-54.2994	-56.6235	11.6566	99.8286	-0.0915803	34.0446	7.18893	10.8035
2012-01-21 08:39:50	-54.3024	-56.6223	11.6603	99.8797	-0.0643042	34.0436	7.19445	10.8073
2012-01-21 08:40:50	-54.3054	-56.6211	11.6629	99.8926	-0.057465	34.0432	7.19078	10.8111
2012-01-21 08:41:51	-54.3085	-56.62	11.6432	99.7308	-0.144086	34.0428	7.19213	10.8148
2012-01-21 08:42:51	-54.3114	-56.6188	11.6542	99.7985	-0.107945	34.043	7.18462	10.8186
2012-01-21 08:43:51	-54.3144	-56.6177	11.6566	99.8461	-0.0824781	34.0423	7.192	10.8223
2012-01-21 08:44:52	-54.3174	-56.6166	11.6523	99.8114	-0.101122	34.0417	7.19188	10.826
2012-01-21 08:45:52	-54.3204	-56.6155	11.6545	99.8979	-0.0547826	34.0409	7.21153	10.8298
2012-01-21 08:46:53	-54.3234	-56.6144	11.6483	99.8585	-0.0760041	34.0405	7.21639	10.8335
2012-01-21 08:47:53	-54.3263	-56.6131	11.6485	99.8987	-0.0544135	34.04	7.22713	10.8373
2012-01-21 08:48:54	-54.3292	-56.6118	11.6474	99.8669	-0.0715821	34.0398	7.22155	10.841
2012-01-21 08:49:54	-54.332	-56.6106	11.6493	99.9243	-0.0407438	34.0388	7.23377	10.8447
2012-01-21 08:50:55	-54.3349	-56.6093	11.6427	99.9225	-0.0417158	34.0389	7.24958	10.8485
2012-01-21 08:51:55	-54.3379	-56.608	11.6421	99.8865	-0.0611586	34.0388	7.24078	10.8523
2012-01-21 08:52:56	-54.3409	-56.6068	11.6441	99.9572	-0.0230461	34.0388	7.25637	10.856
2012-01-21 08:53:56	-54.3439	-56.6055	11.6478	99.9879	-0.00655274	34.0378	7.25593	10.8599
2012-01-21 08:54:56	-54.347	-56.6042	11.6413	99.8469	-0.0826649	34.0382	7.23527	10.8637
2012-01-21 08:55:57	-54.3501	-56.6029	11.64	99.8715	-0.0693955	34.0372	7.24372	10.8675
2012-01-21 08:56:57	-54.3531	-56.6015	11.6355	99.9496	-0.027249	34.0376	7.27704	10.8713
2012-01-21 08:57:58	-54.356	-56.6001	11.6319	99.9473	-0.0285173	34.0366	7.28399	10.8751
2012-01-21 08:58:58	-54.3589	-56.5989	11.6395	99.9447	-0.0299207	34.0354	7.2654	10.8788
2012-01-21 08:59:59	-54.3618	-56.5976	11.6293	99.8444	-0.0842604	34.0348	7.26089	10.8826
2012-01-21 09:00:59	-54.3648	-56.5963	11.643	100.022	0.0117109	34.0348	7.2774	10.8864
2012-01-21 09:02:00	-54.3678	-56.595	11.6326	99.9633	-0.019893	34.0344	7.28415	10.8902
2012-01-21 09:03:00	-54.3709	-56.5937	11.641	99.9762	-0.0129121	34.0346	7.26758	10.894
2012-01-21 09:04:00	-54.3739	-56.5924	11.6456	100.054	0.0290496	34.0334	7.2768	10.8978
2012-01-21 09:05:01	-54.377	-56.591	11.6389	100.028	0.0153768	34.0328	7.28557	10.9008
2012-01-21 09:06:01	-54.3801	-56.5896	11.6328	100.061	0.0333196	34.0324	7.30791	10.9034
2012-01-21 09:07:02	-54.3832	-56.5884	11.638	99.9601	-0.0216876	34.0326	7.26872	10.9059
2012-01-21 09:08:02	-54.3863	-56.5869	11.6306	99.9347	-0.0355314	34.0325	7.2786	10.9085
2012-01-21 09:09:03	-54.3893	-56.5855	11.6403	100.04	0.0215584	34.0324	7.28439	10.9111
2012-01-21 09:10:03	-54.3924	-56.5841	11.6352	100.015	0.00798553	34.0327	7.28819	10.9136
2012-01-21 09:11:04	-54.3956	-56.5827	11.6398	100.05	0.0273287	34.0323	7.28717	10.9162
2012-01-21 09:12:04	-54.3988	-56.5813	11.6442	100.161	0.08757	34.0321	7.30596	10.9188
2012-01-21 09:13:05	-54.4019	-56.5799	NaN	NaN	NaN	34.0327	7.3059	10.9213
2012-01-21 09:14:05	-54.4051	-56.5788	NaN	NaN	NaN	34.0318	7.28811	10.9238
2012-01-21 09:15:05	-54.4082	-56.5775	11.6443	100.087	0.0473268	34.0324	7.28681	10.9263
2012-01-21 09:16:06	-54.4113	-56.5763	11.6496	100.158	0.0860087	34.0324	7.29381	10.9289
2012-01-21 09:17:06	-54.4143	-56.5751	11.655	100.14	0.0763452	34.0328	7.27742	10.9314
2012-01-21 09:18:07	-54.4174	-56.5738	11.6503	100.126	0.0687593	34.0334	7.28414	10.9339
2012-01-21 09:19:07	-54.4205	-56.5726	11.6543	100.179	0.0976277	34.0344	7.28862	10.9364
2012-01-21 09:20:08	-54.4235	-56.5713	11.6663	100.248	0.13557	34.0353	7.28086	10.939
2012-01-21 09:21:08	-54.4266	-56.5701	11.6714	100.32	0.175216	34.0356	7.29047	10.9415
2012-01-21 09:22:09	-54.4297	-56.5688	11.675	100.336	0.183924	34.035	7.28447	10.944
2012-01-21 09:23:09	-54.4328	-56.5676	11.6778	100.378	0.207029	34.0354	7.29018	10.9469
2012-01-21 09:24:09	-54.4359	-56.5664	11.6815	100.409	0.224218	34.0358	7.28845	10.9512
2012-01-21 09:25:10	-54.439	-56.5652	11.6781	100.425	0.233103	34.0366	7.30124	10.9555
2012-01-21 09:26:10	-54.4421	-56.5639	11.6737	100.444	0.243304	34.0379	7.31811	10.9598
2012-01-21 09:27:11	-54.4451	-56.5627	NaN	NaN	NaN	34.0387	7.30989	10.964
2012-01-21 09:28:11	-54.4481	-56.5614	NaN	NaN	NaN	34.0396	7.29403	10.9683
2012-01-21 09:29:12	-54.4513	-56.5602	11.6764	100.346	0.190241	34.0397	7.28561	10.9726
2012-01-21 09:30:12	-54.4544	-56.5589	11.671	100.219	0.120536	34.0403	7.26358	10.9769
2012-01-21 09:31:13	-54.4575	-56.5578	11.6728	100.176	0.0968831	34.0405	7.24674	10.9812
2012-01-21 09:32:13	-54.4606	-56.5565	11.6682	100.146	0.0806002	34.0422	7.24888	10.9855
2012-01-21 09:33:13	-54.4637	-56.5553	11.6673	100.115	0.0632965	34.0438	7.24249	10.9898
2012-01-21 09:34:14	-54.4668	-56.5541	11.6791	100.182	0.100651	34.0437	7.23517	10.9941
2012-01-21 09:35:14	-54.4699	-56.5528	11.6773	100.204	0.112888	34.0437	7.24493	10.9984
2012-01-21 09:36:15	-54.4729	-56.5517	11.6869	100.348	0.19245	34.0429	7.2631	11.0026
2012-01-21 09:37:15	-54.4758	-56.5504	11.6882	100.37	0.204817	34.0418	7.26641	11.0068
2012-01-21 09:38:16	-54.4789	-56.5492	11.6821	100.407	0.22548	34.0406	7.29032	11.011
2012-01-21 09:39:16	-54.4819	-56.5479	11.6825	100.373	0.206451	34.0402	7.27902	11.0152
2012-01-21 09:40:17	-54.485	-56.5466	11.6842	100.317	0.175714	34.0392	7.25917	11.0195
2012-01-21 09:41:17	-54.4881	-56.5454	11.6825	100.292	0.161807	34.0385	7.25722	11.0238
2012-01-21 09:42:17	-54.4912	-56.5441	11.6787	100.246	0.136617	34.038	7.25325	11.0281
2012-01-21 09:43:18	-54.4943	-56.5427	11.6713	100.192	0.106454	34.0379	7.255	11.0323
2012-01-21 09:44:18	-54.4974	-56.5415	11.6675	100.143	0.0795129	34.0379	7.25054	11.0365
2012-01-21 09:45:19	-54.5004	-56.5402	11.6651	100.103	0.0571616	34.0379	7.24485	11.0407
2012-01-21 09:46:19	-54.5034	-56.5389	11.6725	100.19	0.105743	34.0378	7.25169	11.0449
2012-01-21 09:47:20	-54.5064	-56.5377	NaN	NaN	NaN	34.0369	7.24918	11.0492
2012-01-21 09:48:20	-54.5094	-56.5365	NaN	NaN	NaN	34.0358	7.26003	11.0534
2012-01-21 09:49:21	-54.5124	-56.5353	11.6755	100.329	0.183293	34.0346	7.28658	11.0576
2012-01-21 09:50:21	-54.5154	-56.5341	11.6634	100.276	0.154253	34.033	7.30095	11.0618
2012-01-21 09:51:21	-54.5184	-56.5328	11.6571	100.179	0.0999975	34.0316	7.28753	11.066
2012-01-21 09:52:22	-54.5214	-56.5315	11.6547	100.091	0.0507017	34.0317	7.26731	11.0702
2012-01-21 09:53:22	-54.5245	-56.5302	11.6483	100.031	0.0172109	34.0317	7.26476	11.0744
2012-01-21 09:54:23	-54.5275	-56.529	11.65	100.088	0.0492885	34.0318	7.27702	11.0786
2012-01-21 09:55:23	-54.5305	-56.5278	11.6474	100.062	0.0348625	34.0315	7.2766	11.0828
2012-01-21 09:56:24	-54.5335	-56.5266	11.6513	100.01	0.00580556	34.0315	7.25458	11.087
2012-01-21 09:57:24	-54.5364	-56.5254	11.6534	99.9396	-0.0339043	34.0321	7.23161	11.0913
2012-01-21 09:58:25	-54.5394	-56.5242	11.6512	99.8716	-0.0721455	34.0327	7.21804	11.0955
2012-01-21 09:59:25	-54.5425	-56.523	11.6469	99.7685	-0.130165	34.0333	7.19888	11.0999
2012-01-21 10:00:26	-54.5455	-56.5218	11.6494	99.6958	-0.171167	34.033	7.17254	11.1044
2012-01-21 10:01:26	-54.5485	-56.5206	11.6626	99.7647	-0.132514	34.0328	7.16021	11.1089
2012-01-21 10:02:26	-54.5516	-56.5193	11.6707	99.8389	-0.0907692	34.0323	7.16053	11.1135
2012-01-21 10:03:27	-54.5547	-56.5181	11.6842	99.9728	-0.0153487	34.0318	7.16644	11.118
2012-01-21 10:04:27	-54.5577	-56.5169	11.6839	99.9478	-0.0294489	34.0311	7.16147	11.1226
2012-01-21 10:05:28	-54.5608	-56.5157	11.6859	99.9366	-0.0358421	34.0307	7.15441	11.1271
2012-01-21 10:06:28	-54.5639	-56.5145	11.6831	99.8755	-0.0703913	34.0308	7.14362	11.1318
2012-01-21 10:07:29	-54.567	-56.5133	11.69	99.8774	-0.0693842	34.0316	7.12615	11.1364
2012-01-21 10:08:29	-54.5702	-56.5121	11.6872	99.8062	-0.109766	34.0326	7.11336	11.141
2012-01-21 10:09:30	-54.5733	-56.5109	11.6896	99.7968	-0.115145	34.0337	7.10582	11.1457
2012-01-21 10:10:30	-54.5765	-56.5097	11.6907	99.7967	-0.115294	34.0357	7.10255	11.1503
2012-01-21 10:11:31	-54.5796	-56.5085	11.6963	99.8382	-0.0918345	34.039	7.10068	11.1549
2012-01-21 10:12:31	-54.5826	-56.5074	11.7053	99.91	-0.051141	34.0415	7.09929	11.1595
2012-01-21 10:13:31	-54.5856	-56.5062	11.7187	100.099	0.0561256	34.0413	7.11943	11.1641
2012-01-21 10:14:32	-54.5887	-56.5051	11.7134	100.119	0.0675823	34.0416	7.1368	11.1687
2012-01-21 10:15:32	-54.5918	-56.5039	11.7329	100.263	0.149617	34.0444	7.13055	11.1734
2012-01-21 10:16:33	-54.595	-56.5028	11.7395	100.252	0.143572	34.048	7.11253	11.178
2012-01-21 10:17:33	-54.5981	-56.5016	11.7405	100.243	0.138591	34.0504	7.10758	11.1827
2012-01-21 10:18:34	-54.6012	-56.5004	11.7455	100.254	0.145069	34.0509	7.09936	11.1873
2012-01-21 10:19:34	-54.6044	-56.4993	11.7452	100.235	0.134253	34.0481	7.09471	11.192
2012-01-21 10:20:35	-54.6075	-56.4982	11.7541	100.347	0.198633	34.0433	7.10437	11.1967
2012-01-21 10:21:35	-54.6106	-56.4971	11.7624	100.466	0.266673	34.04	7.11712	11.2014
2012-01-21 10:22:36	-54.6136	-56.496	11.7651	100.5	0.286248	34.0388	7.12049	11.206
2012-01-21 10:23:36	-54.6168	-56.4949	11.7611	100.4	0.229326	34.0377	7.10339	11.2107
2012-01-21 10:24:37	-54.6199	-56.4938	11.7567	100.264	0.151499	34.038	7.07582	11.2154
2012-01-21 10:25:37	-54.6229	-56.4927	11.7538	100.137	0.0784089	34.039	7.04777	11.22
2012-01-21 10:26:38	-54.6259	-56.4917	11.7563	100.113	0.0649579	34.0401	7.03592	11.2247
2012-01-21 10:27:38	-54.629	-56.4906	11.7579	100.049	0.0278912	34.0369	7.01418	11.2294
2012-01-21 10:28:38	-54.6322	-56.4894	11.7691	100.081	0.0468306	34.0315	6.99818	11.2342
2012-01-21 10:29:39	-54.6353	-56.4883	11.7778	100.051	0.0293649	34.0285	6.97071	11.239
2012-01-21 10:30:39	-54.6384	-56.4871	11.7881	100.069	0.0399517	34.027	6.95308	11.2437
2012-01-21 10:31:40	-54.6415	-56.4859	11.7918	100.091	0.0525684	34.0248	6.95083	11.2485
2012-01-21 10:32:40	-54.6446	-56.4847	11.7917	100.012	0.00694032	34.0229	6.93048	11.2532
2012-01-21 10:33:41	-54.6478	-56.4835	11.8015	100.091	0.0525041	34.0218	6.92941	11.258
2012-01-21 10:34:41	-54.6509	-56.4823	11.8018	100.123	0.0709502	34.0213	6.93854	11.2627
2012-01-21 10:35:42	-54.6539	-56.4811	11.8019	100.047	0.0273718	34.0211	6.9186	11.2674
2012-01-21 10:36:42	-54.657	-56.4798	11.8019	100.061	0.0355032	34.0202	6.92159	11.272
2012-01-21 10:37:43	-54.6601	-56.4786	11.7999	100.097	0.0561605	34.0205	6.93563	11.2768
2012-01-21 10:38:43	-54.6633	-56.4772	11.7956	99.9912	-0.0050986	34.0214	6.91622	11.2815
2012-01-21 10:39:43	-54.6665	-56.4759	11.7992	100.059	0.034457	34.0225	6.92459	11.2862
2012-01-21 10:40:44	-54.6697	-56.4745	11.798	100.03	0.0173515	34.023	6.91972	11.2909
2012-01-21 10:41:44	-54.6728	-56.4732	11.8024	100.018	0.0105655	34.0246	6.9071	11.2955
2012-01-21 10:42:45	-54.6759	-56.4718	11.8001	99.9599	-0.0233406	34.0275	6.89598	11.3001
2012-01-21 10:43:45	-54.679	-56.4705	11.807	99.8599	-0.0816644	34.0318	6.8539	11.3047
2012-01-21 10:44:46	-54.6821	-56.4692	11.8158	99.8073	-0.112391	34.0364	6.81788	11.3094
2012-01-21 10:45:46	-54.6852	-56.4677	11.8279	99.7998	-0.116905	34.0398	6.7881	11.3139
2012-01-21 10:46:47	-54.6883	-56.4661	11.8702	100.313	0.182602	34.0428	6.82948	11.3184
2012-01-21 12:02:19	-54.9249	-56.361	11.8034	100.012	0.00762288	34.024	6.89748	11.6408
2012-01-21 12:03:20	-54.9281	-56.3597	11.8008	100.018	0.0110422	34.0236	6.90417	11.6423
2012-01-21 12:04:20	-54.9314	-56.3583	11.8015	100.046	0.0283636	34.0224	6.90647	11.6438
2012-01-21 12:05:21	-54.9345	-56.357	11.8032	100.067	0.0412316	34.0217	6.90702	11.6452
2012-01-21 12:06:21	-54.9377	-56.3557	11.8057	100.039	0.0238884	34.0212	6.89402	11.6467
2012-01-21 12:07:21	-54.9408	-56.3544	11.8061	99.9733	-0.0164533	34.0218	6.87661	11.6481
2012-01-21 12:08:22	-54.9439	-56.353	11.8028	99.9001	-0.0616049	34.0224	6.86344	11.6495
2012-01-21 12:09:23	-54.9471	-56.3517	11.8094	99.9271	-0.0449688	34.0227	6.85476	11.651
2012-01-21 12:10:23	-54.9503	-56.3504	11.8138	99.8786	-0.0749027	34.0239	6.83099	11.6524
2012-01-21 12:11:23	-54.9535	-56.349	11.8143	99.7783	-0.136826	34.0258	6.8022	11.6539
2012-01-21 12:12:24	-54.9566	-56.3476	11.8231	99.7725	-0.140455	34.0274	6.77949	11.6554
2012-01-21 12:13:24	-54.9598	-56.3462	11.8357	99.7769	-0.137748	34.0294	6.7496	11.6568
2012-01-21 12:14:25	-54.963	-56.3448	11.8511	99.8189	-0.111833	34.031	6.7269	11.6583
2012-01-21 12:15:25	-54.9662	-56.3434	11.8581	99.7807	-0.135486	34.032	6.70066	11.6598
2012-01-21 12:16:26	-54.9694	-56.342	11.8743	99.7543	-0.151874	34.0334	6.65626	11.6612
2012-01-21 12:17:26	-54.9726	-56.3406	11.8856	99.742	-0.159516	34.0373	6.62641	11.6627
2012-01-21 12:18:26	-54.9758	-56.3393	11.8938	99.8337	-0.102879	34.0423	6.63207	11.6642
2012-01-21 12:19:27	-54.979	-56.3379	11.915	100.086	0.0532259	34.044	6.65305	11.6656
2012-01-21 12:20:27	-54.9822	-56.3365	11.9405	100.315	0.19469	34.0425	6.65549	11.6671
2012-01-21 12:21:28	-54.9853	-56.3351	11.955	100.444	0.274681	34.0429	6.65502	11.6685
2012-01-21 12:22:28	-54.9885	-56.3338	11.9573	100.564	0.348845	34.0455	6.68132	11.67
2012-01-21 12:23:29	-54.9917	-56.3326	11.9613	100.714	0.441798	34.048	6.71141	11.6715
2012-01-21 12:24:29	-54.995	-56.3314	11.9555	100.747	0.462307	34.0483	6.73196	11.6729
2012-01-21 12:25:30	-54.9981	-56.3302	11.9543	100.794	0.491406	34.0473	6.74794	11.6744
2012-01-21 12:26:30	-55.0012	-56.3289	11.953	100.803	0.497075	34.046	6.75546	11.6758
2012-01-21 12:27:31	-55.0043	-56.3276	11.9415	100.74	0.458095	34.0448	6.76528	11.6772
2012-01-21 12:28:31	-55.0074	-56.3263	11.9251	100.671	0.415451	34.0427	6.78432	11.6787
2012-01-21 12:29:31	-55.0106	-56.3251	11.9313	100.796	0.493192	34.0406	6.80299	11.6801
2012-01-21 12:30:32	-55.0138	-56.3239	11.9224	100.764	0.473374	34.04	6.8145	11.6816
2012-01-21 12:31:32	-55.0169	-56.3227	11.9168	100.709	0.439468	34.0376	6.81332	11.683
2012-01-21 12:32:33	-55.0201	-56.3214	11.9148	100.733	0.454283	34.0344	6.82393	11.6845
2012-01-21 12:33:33	-55.0234	-56.3201	11.9066	100.644	0.399099	34.0325	6.81809	11.686
2012-01-21 12:34:34	-55.0267	-56.3188	11.9028	100.581	0.360571	34.0314	6.80985	11.6875
2012-01-21 12:35:34	-55.03	-56.3175	11.8987	100.512	0.31795	34.0302	6.8007	11.689
2012-01-21 12:36:35	-55.0333	-56.3161	11.9037	100.534	0.331309	34.0291	6.79424	11.6905
2012-01-21 12:37:35	-55.0365	-56.3148	11.8938	100.412	0.256039	34.0291	6.78437	11.692
2012-01-21 12:38:35	-55.0398	-56.3135	11.903	100.423	0.262666	34.0288	6.76636	11.6935
2012-01-21 12:39:36	-55.0431	-56.3121	11.8974	100.321	0.199437	34.0286	6.75191	11.695
2012-01-21 12:40:36	-55.0463	-56.3108	11.911	100.417	0.259091	34.0302	6.74667	11.6965
2012-01-21 12:41:37	-55.0496	-56.3094	11.92	100.513	0.318566	34.0329	6.75082	11.698
2012-01-21 12:42:37	-55.0529	-56.308	11.9234	100.492	0.306034	34.0369	6.73757	11.6995
2012-01-21 12:43:38	-55.0562	-56.3066	11.9365	100.568	0.352975	34.0419	6.7278	11.701
2012-01-21 12:44:38	-55.0595	-56.3053	11.9365	100.577	0.358995	34.0472	6.72911	11.7025
2012-01-21 12:45:39	-55.0628	-56.3039	11.9418	100.613	0.381274	34.0519	6.72511	11.704
2012-01-21 12:46:39	-55.0661	-56.3026	NaN	NaN	NaN	34.0565	6.72195	11.7055
2012-01-21 12:47:39	-55.0693	-56.3013	NaN	NaN	NaN	34.0592	6.72222	11.707
2012-01-21 12:48:40	-55.0726	-56.2999	11.9538	100.694	0.431775	34.0608	6.71519	11.7085
2012-01-21 12:49:40	-55.0759	-56.2986	11.9525	100.638	0.39716	34.0611	6.70257	11.71
2012-01-21 12:50:41	-55.0791	-56.2973	11.9524	100.586	0.36506	34.0619	6.68915	11.7115
2012-01-21 12:51:41	-55.0825	-56.296	11.9553	100.549	0.341867	34.0631	6.67284	11.713
2012-01-21 12:52:42	-55.0858	-56.2946	11.9572	100.537	0.334867	34.0644	6.66574	11.7145
2012-01-21 12:53:42	-55.0891	-56.2933	11.9596	100.528	0.328954	34.0647	6.65613	11.7161
2012-01-21 12:54:43	-55.0923	-56.292	11.964	100.512	0.318917	34.0639	6.64115	11.7175
2012-01-21 12:55:43	-55.0956	-56.2906	11.9723	100.548	0.34182	34.0643	6.63184	11.719
2012-01-21 12:56:43	-55.0988	-56.2893	11.9775	100.566	0.352934	34.0652	6.62452	11.7205
2012-01-21 12:57:44	-55.1021	-56.2879	11.9767	100.507	0.316343	34.0662	6.61143	11.722
2012-01-21 12:58:44	-55.1054	-56.2865	11.9832	100.495	0.309073	34.0664	6.59136	11.7235
2012-01-21 12:59:45	-55.1086	-56.2851	11.9946	100.66	0.411753	34.0659	6.60903	11.725
2012-01-21 13:00:45	-55.1119	-56.2838	11.9976	100.712	0.444615	34.0651	6.61413	11.7265
2012-01-21 13:01:46	-55.1151	-56.2824	12.0062	100.792	0.494825	34.0632	6.61589	11.728
2012-01-21 13:02:46	-55.1183	-56.2811	12.0163	100.858	0.536232	34.0611	6.61215	11.7294
2012-01-21 13:03:46	-55.1215	-56.2798	12.0036	100.821	0.513001	34.0603	6.63036	11.7309
2012-01-21 13:04:47	-55.1248	-56.2784	12.0003	100.81	0.506168	34.0588	6.63518	11.7324
2012-01-21 13:05:47	-55.128	-56.2771	NaN	NaN	NaN	34.0578	6.62238	11.739
2012-01-21 13:06:48	-55.1312	-56.2758	NaN	NaN	NaN	34.0571	6.61917	11.7459
2012-01-21 13:07:48	-55.1344	-56.2745	12.0004	100.73	0.457484	34.0568	6.61174	11.7528
2012-01-21 13:08:49	-55.1375	-56.2732	12.0027	100.671	0.421057	34.0564	6.59159	11.7596
2012-01-21 13:09:49	-55.1407	-56.272	12.0041	100.637	0.400229	34.0562	6.57717	11.7665
2012-01-21 13:10:49	-55.144	-56.2707	12.0091	100.639	0.40218	34.0562	6.56736	11.7735
2012-01-21 13:11:50	-55.1472	-56.2694	12.0099	100.696	0.438231	34.0564	6.57983	11.7804
2012-01-21 13:12:50	-55.1504	-56.2682	12.0113	100.681	0.429327	34.0568	6.57331	11.7875
2012-01-21 13:13:51	-55.1537	-56.2668	NaN	NaN	NaN	34.056	6.56881	11.7946
2012-01-21 13:14:51	-55.1571	-56.2655	NaN	NaN	NaN	34.0553	6.57915	11.8019
2012-01-21 13:15:52	-55.1603	-56.2641	12.0246	100.849	0.537146	34.0542	6.58665	11.8088
2012-01-21 13:16:52	-55.1636	-56.2628	12.0227	100.818	0.518189	34.0535	6.5831	11.8159
2012-01-21 13:17:53	-55.1669	-56.2615	12.0205	100.785	0.497552	34.0529	6.5788	11.8231
2012-01-21 13:18:53	-55.1703	-56.2602	12.0223	100.792	0.502865	34.053	6.57609	11.8303
2012-01-21 13:19:54	-55.1736	-56.2589	12.0131	100.75	0.476637	34.0534	6.5826	11.8375
2012-01-21 13:20:54	-55.1769	-56.2576	12.012	100.723	0.460004	34.0533	6.57651	11.8447
2012-01-21 13:21:55	-55.1802	-56.2563	12.0088	100.761	0.4848	34.0517	6.59494	11.8518
2012-01-21 13:22:55	-55.1835	-56.2549	12.0106	100.813	0.518493	34.0506	6.6036	11.8574
2012-01-21 13:23:55	-55.1868	-56.2537	12.0111	100.799	0.509607	34.0517	6.60028	11.8603
2012-01-21 13:24:56	-55.1901	-56.2525	12.01	100.782	0.499131	34.0524	6.59765	11.8633
2012-01-21 13:25:56	-55.1933	-56.2511	12.0087	100.851	0.54292	34.0527	6.6156	11.8662
2012-01-21 13:26:57	-55.1966	-56.2499	12.0164	100.923	0.58956	34.0506	6.61825	11.8691
2012-01-21 13:27:57	-55.1999	-56.2486	12.003	100.866	0.553375	34.049	6.6311	11.872
2012-01-21 13:28:57	-55.2033	-56.2473	12.0102	100.883	0.564503	34.0494	6.6172	11.875
2012-01-21 13:29:58	-55.2066	-56.246	12.0022	100.744	0.475614	34.049	6.5964	11.878
2012-01-21 13:30:58	-55.2098	-56.2446	11.9917	100.54	0.345465	34.0497	6.56643	11.8809
2012-01-21 13:31:59	-55.2132	-56.2431	12.001	100.624	0.39953	34.0535	6.5683	11.8839
2012-01-21 13:32:59	-55.2165	-56.2416	12.0033	100.642	0.410819	34.0552	6.56751	11.8868
2012-01-21 13:34:00	-55.2197	-56.2402	12.0133	100.701	0.449073	34.0542	6.56	11.8897
2012-01-21 13:35:00	-55.223	-56.2388	12.0173	100.747	0.479069	34.0537	6.56247	11.8927
2012-01-21 13:36:01	-55.2263	-56.2373	12.0099	100.668	0.42866	34.0536	6.55931	11.8956
2012-01-21 13:37:01	-55.2296	-56.2359	12.0099	100.71	0.455374	34.0531	6.56754	11.8985
2012-01-21 13:38:01	-55.2328	-56.2345	12.0095	100.726	0.466095	34.0522	6.57039	11.9014
2012-01-21 13:39:02	-55.2362	-56.2331	12.0039	100.827	0.530749	34.0536	6.60808	11.9044
2012-01-21 13:40:02	-55.2394	-56.2318	12.0176	100.99	0.635631	34.0535	6.62086	11.9073
2012-01-21 13:41:03	-55.2427	-56.2303	12.0067	100.838	0.538319	34.0526	6.60458	11.9102
2012-01-21 13:42:03	-55.2459	-56.229	12.0178	100.905	0.58169	34.0523	6.59771	11.9131
2012-01-21 13:43:04	-55.2492	-56.2275	12.0149	100.895	0.575579	34.0528	6.60083	11.9161
2012-01-21 13:44:04	-55.2524	-56.2261	12.0205	100.934	0.600841	34.0516	6.59998	11.919
2012-01-21 13:45:05	-55.2556	-56.2248	12.0206	100.893	0.575105	34.0516	6.59014	11.9219
2012-01-21 13:46:05	-55.2588	-56.2234	12.0247	100.932	0.600319	34.0499	6.59136	11.9248
2012-01-21 13:47:06	-55.2621	-56.222	12.0254	100.929	0.598244	34.05	6.58724	11.9277
2012-01-21 13:48:06	-55.2654	-56.2205	12.0404	101.018	0.656068	34.0501	6.57877	11.9306
2012-01-21 13:49:07	-55.2686	-56.2191	12.0375	101.024	0.660441	34.0484	6.5874	11.9336
2012-01-21 13:50:07	-55.272	-56.2177	12.044	101.031	0.665471	34.0484	6.57385	11.9365
2012-01-21 13:51:07	-55.2752	-56.2162	12.0431	101.015	0.655145	34.0486	6.57067	11.9394
2012-01-21 13:52:08	-55.2785	-56.2149	12.0402	100.967	0.624206	34.0485	6.56277	11.9424
2012-01-21 13:53:08	-55.2819	-56.2135	12.0444	100.97	0.626728	34.0482	6.55233	11.9453
2012-01-21 13:54:09	-55.2852	-56.2121	12.0447	100.92	0.595001	34.0486	6.53857	11.9483
2012-01-21 13:55:09	-55.2884	-56.2107	12.0434	100.828	0.535854	34.0497	6.51762	11.9512
2012-01-21 13:56:10	-55.2917	-56.2093	12.0542	100.824	0.533211	34.0502	6.4923	11.954
2012-01-21 13:57:10	-55.295	-56.2079	12.0605	100.791	0.512291	34.052	6.46847	11.9567
2012-01-21 13:58:11	-55.2982	-56.2066	12.0637	100.772	0.500163	34.0533	6.45611	11.9595
2012-01-21 17:07:30	-55.8759	-55.911	13.3064	100.9	0.689868	33.7826	3.86549	12.9828
2012-01-21 17:08:30	-55.8789	-55.91	13.3092	100.918	0.703622	33.7825	3.86442	12.9895
2012-01-21 17:09:31	-55.882	-55.9089	13.3052	100.869	0.666911	33.7833	3.85873	12.9963
2012-01-21 17:10:31	-55.885	-55.9079	13.3008	100.841	0.646122	33.7825	3.85922	13.0031
2012-01-21 17:11:32	-55.8881	-55.9069	13.3039	100.87	0.669272	33.7818	3.8591	13.0099
2012-01-21 17:12:32	-55.8911	-55.9059	13.3001	100.809	0.62271	33.7821	3.84878	13.0167
2012-01-21 17:13:33	-55.8942	-55.9049	13.3015	100.777	0.598827	33.782	3.83715	13.0235
2012-01-21 17:14:33	-55.8972	-55.9039	13.295	100.734	0.565951	33.7824	3.83837	13.0302
2012-01-21 17:15:34	-55.9001	-55.9029	13.2997	100.784	0.605119	33.7838	3.84072	13.037
2012-01-21 17:16:34	-55.9031	-55.9019	13.2985	100.799	0.617604	33.7839	3.84623	13.0436
2012-01-21 17:17:34	-55.906	-55.9009	13.3021	100.832	0.643342	33.7839	3.84743	13.0502
2012-01-21 17:18:35	-55.909	-55.8999	13.3022	100.89	0.689377	33.7852	3.86172	13.057
2012-01-21 17:19:35	-55.912	-55.8989	13.3117	101.046	0.810126	33.7876	3.88179	13.0637
2012-01-21 17:20:36	-55.915	-55.898	13.3198	101.125	0.872514	33.79	3.88498	13.0704
2012-01-21 17:21:36	-55.9179	-55.897	13.3232	101.209	0.938335	33.7922	3.89963	13.0771
2012-01-21 17:22:37	-55.9209	-55.896	13.328	101.298	1.00818	33.7946	3.91206	13.0838
2012-01-21 17:23:37	-55.9239	-55.8951	13.3193	101.232	0.957726	33.7959	3.91177	13.0905
2012-01-21 17:24:37	-55.9269	-55.8941	13.324	101.304	1.01514	33.7972	3.92139	13.0973
2012-01-21 17:25:38	-55.93	-55.8931	13.3302	101.385	1.07889	33.7988	3.93018	13.1042
2012-01-21 17:26:39	-55.933	-55.8921	13.3279	101.345	1.04896	33.7999	3.92299	13.1109
2012-01-21 17:27:39	-55.936	-55.8911	13.3311	101.394	1.08793	33.8002	3.9293	13.1177
2012-01-21 17:28:39	-55.939	-55.8902	13.322	101.315	1.02739	33.8012	3.92613	13.1245
2012-01-21 17:29:40	-55.942	-55.8892	13.3334	101.391	1.08746	33.7996	3.92167	13.1312
2012-01-21 17:30:40	-55.945	-55.8882	13.3305	101.404	1.09903	33.7987	3.92961	13.1379
2012-01-21 17:31:41	-55.9479	-55.8871	13.3324	101.344	1.05283	33.7981	3.91098	13.1445
2012-01-21 17:32:41	-55.9508	-55.8861	13.3333	101.226	0.961949	33.7971	3.87826	13.1512
2012-01-21 17:33:42	-55.9538	-55.8852	13.3303	101.075	0.844291	33.7939	3.84551	13.1579
2012-01-21 17:34:42	-55.9568	-55.8842	13.3317	101.037	0.814932	33.7919	3.83287	13.1647
2012-01-21 17:35:43	-55.9598	-55.8831	13.3374	100.934	0.735247	33.7888	3.79578	13.1714
2012-01-21 17:36:43	-55.9628	-55.8821	13.3407	100.934	0.736173	33.7852	3.78891	13.1781
2012-01-21 17:37:43	-55.9658	-55.8811	13.3454	100.949	0.748183	33.7835	3.78435	13.1848
2012-01-21 17:38:44	-55.9687	-55.8801	13.3458	100.897	0.707936	33.782	3.77118	13.1915
2012-01-21 17:39:44	-55.9717	-55.8791	13.3475	100.717	0.566881	33.7806	3.72135	13.1982
2012-01-21 17:40:45	-55.9747	-55.8781	13.3533	100.686	0.542828	33.7784	3.70206	13.2049
2012-01-21 17:41:45	-55.9777	-55.8771	13.3535	100.642	0.508984	33.7764	3.69131	13.2117
2012-01-21 17:42:46	-55.9807	-55.8762	13.3462	100.569	0.451255	33.7752	3.68577	13.2185
2012-01-21 17:43:46	-55.9837	-55.8753	13.3497	100.625	0.496181	33.7741	3.69343	13.2253
2012-01-21 17:44:47	-55.9867	-55.8745	13.3544	100.604	0.47987	33.7731	3.67752	13.232
2012-01-21 17:45:47	-55.9897	-55.8738	13.3552	100.562	0.447192	33.7718	3.66525	13.2386
2012-01-21 17:46:47	-55.9926	-55.8731	13.356	100.587	0.467421	33.7705	3.66866	13.2452
2012-01-21 17:47:48	-55.9955	-55.8724	13.36	100.645	0.514242	33.7696	3.67471	13.2518
2012-01-21 17:48:48	-55.9983	-55.8717	13.3596	100.648	0.516763	33.7694	3.67651	13.2583
2012-01-21 17:49:49	-56.0013	-55.871	13.3569	100.687	0.548512	33.7716	3.68966	13.2649
2012-01-21 17:50:49	-56.0042	-55.8702	13.3561	100.75	0.599382	33.7737	3.70561	13.2715
2012-01-21 17:51:50	-56.0072	-55.8694	13.3657	100.816	0.652293	33.7729	3.70276	13.2782
2012-01-21 17:52:50	-56.0101	-55.8686	13.3561	100.849	0.679508	33.7745	3.73123	13.2847
2012-01-21 17:53:51	-56.0129	-55.8678	13.3641	100.939	0.752179	33.7743	3.73809	13.2912
2012-01-21 17:54:51	-56.0158	-55.867	13.3704	100.974	0.780639	33.7757	3.73404	13.2977
2012-01-21 17:55:51	-56.0187	-55.8664	13.3658	101.013	0.812799	33.7761	3.75426	13.3043
2012-01-21 17:56:52	-56.0216	-55.8657	13.3562	100.875	0.702298	33.7772	3.73638	13.3109
2012-01-21 17:57:52	-56.0245	-55.8649	13.3592	100.841	0.676201	33.7763	3.72157	13.3174
2012-01-21 17:58:53	-56.0274	-55.8644	13.3695	101.025	0.824792	33.7761	3.74964	13.3241
2012-01-21 17:59:53	-56.0303	-55.8636	13.367	101.101	0.88625	33.7761	3.77349	13.3306
2012-01-21 18:00:54	-56.0333	-55.863	13.3626	101.101	0.886239	33.7779	3.7811	13.3269
2012-01-21 18:01:54	-56.0363	-55.8624	13.3607	101.217	0.978332	33.7795	3.8128	13.3221
2012-01-21 18:02:55	-56.0392	-55.8618	13.3624	101.389	1.11564	33.7804	3.85331	13.3171
2012-01-21 18:03:55	-56.0421	-55.8613	13.3442	101.356	1.08814	33.7842	3.87977	13.3122
2012-01-21 18:04:55	-56.045	-55.861	13.3513	101.443	1.15725	33.7876	3.8871	13.3073
2012-01-21 18:05:56	-56.0479	-55.8605	13.3471	101.443	1.15572	33.7912	3.89299	13.3024
2012-01-21 18:06:56	-56.0509	-55.8602	NaN	NaN	NaN	33.7924	3.91945	13.2975
2012-01-21 18:07:57	-56.0538	-55.8598	NaN	NaN	NaN	33.7958	3.91924	13.2927
2012-01-21 18:08:57	-56.0567	-55.8595	13.3464	101.589	1.27022	33.7964	3.9288	13.2878
2012-01-21 18:09:58	-56.0597	-55.8591	13.3391	101.555	1.24192	33.7984	3.93321	13.283
2012-01-21 18:10:58	-56.0626	-55.8587	13.3391	101.62	1.2927	33.7988	3.94885	13.278
2012-01-21 18:11:59	-56.0654	-55.8583	13.3364	101.591	1.26867	33.7997	3.9467	13.2731
2012-01-21 18:12:59	-56.0683	-55.858	13.3338	101.595	1.27074	33.7994	3.95247	13.2682
2012-01-21 18:14:00	-56.0713	-55.8577	13.3304	101.636	1.30263	33.8005	3.96751	13.2633
2012-01-21 18:15:00	-56.0741	-55.8571	13.338	101.714	1.36359	33.7998	3.97246	13.2583
2012-01-21 18:16:01	-56.0769	-55.8568	13.3393	101.712	1.36112	33.8011	3.9683	13.2533
2012-01-21 18:17:01	-56.0797	-55.8564	13.3445	101.746	1.38692	33.8014	3.96653	13.2482
2012-01-21 18:18:01	-56.0826	-55.8559	13.3349	101.647	1.3072	33.8014	3.96028	13.2433
2012-01-21 18:19:02	-56.0855	-55.8555	13.3428	101.642	1.30239	33.8004	3.94176	13.2384
2012-01-21 18:20:02	-56.0884	-55.8551	13.3415	101.562	1.23805	33.8	3.92353	13.2335
2012-01-21 18:21:03	-56.0912	-55.8547	13.3467	101.616	1.28057	33.8001	3.92723	13.2285
2012-01-21 18:22:03	-56.094	-55.8544	13.3448	101.579	1.25045	33.8002	3.92209	13.2234
2012-01-21 18:23:04	-56.0968	-55.8541	13.3397	101.515	1.199	33.7996	3.91578	13.2184
2012-01-21 18:24:04	-56.0997	-55.8538	NaN	NaN	NaN	33.799	3.9166	13.2135
2012-01-21 18:25:05	-56.1026	-55.8534	NaN	NaN	NaN	33.799	3.93429	13.2086
2012-01-21 18:26:05	-56.1055	-55.8531	13.3464	101.585	1.25102	33.7975	3.91818	13.2037
2012-01-21 18:27:05	-56.1084	-55.8527	13.3384	101.547	1.22032	33.798	3.92467	13.1988
2012-01-21 18:28:06	-56.1113	-55.8523	13.3406	101.553	1.22415	33.7971	3.92035	13.1939
2012-01-21 18:29:06	-56.1141	-55.8519	13.3442	101.548	1.21916	33.7975	3.9117	13.1889
2012-01-21 18:30:07	-56.117	-55.8515	13.3484	101.661	1.30768	33.7984	3.93216	13.184
2012-01-21 18:31:07	-56.1198	-55.851	13.3427	101.642	1.29137	33.7985	3.93815	13.1789
2012-01-21 18:32:08	-56.1226	-55.8506	13.3452	101.744	1.37038	33.8	3.95763	13.1738
2012-01-21 18:33:08	-56.1253	-55.8502	13.344	101.846	1.44926	33.8009	3.98708	13.1682
2012-01-21 18:34:08	-56.1281	-55.8499	NaN	NaN	NaN	33.8032	4.04479	13.1588
2012-01-21 18:35:09	-56.1309	-55.8495	NaN	NaN	NaN	33.807	4.1349	13.1494
2012-01-21 18:36:09	-56.1337	-55.8491	13.3482	102.718	2.12201	33.8154	4.19515	13.1399
2012-01-21 18:37:10	-56.1365	-55.8487	13.3404	103.485	2.71336	33.8276	4.40153	13.1305
2012-01-21 18:38:10	-56.1391	-55.8482	13.3121	103.984	3.09499	33.8399	4.58271	13.1211
2012-01-21 18:39:11	-56.1417	-55.8479	13.2823	104.115	3.18996	33.8586	4.6696	13.1117
2012-01-21 18:40:11	-56.1444	-55.8475	13.2164	103.932	3.0428	33.8804	4.7519	13.1024
2012-01-21 18:41:11	-56.1471	-55.8471	13.1322	103.503	2.70568	33.8956	4.80679	13.093
2012-01-21 18:42:12	-56.1499	-55.8468	13.108	103.553	2.73988	33.9074	4.86566	13.0835
2012-01-21 18:43:12	-56.1527	-55.8464	13.0694	103.457	2.66061	33.9173	4.9164	13.0741
2012-01-21 18:44:13	-56.1556	-55.8461	13.0281	103.216	2.47157	33.9246	4.93724	13.0651
2012-01-21 18:45:13	-56.1584	-55.8457	13.0035	103.02	2.3193	33.9303	4.93436	13.0592
2012-01-21 18:46:14	-56.161	-55.8453	12.9771	102.932	2.24917	33.9342	4.96574	13.0532
2012-01-21 18:47:14	-56.1637	-55.8449	12.9634	102.989	2.29059	33.9348	5.00686	13.0472
2012-01-21 18:48:15	-56.1664	-55.8445	12.9606	103.189	2.44066	33.9356	5.06355	13.0412
2012-01-21 18:49:15	-56.1691	-55.8441	12.9608	103.431	2.6225	33.9389	5.12432	13.0354
2012-01-21 18:50:15	-56.172	-55.8437	12.9364	103.559	2.7171	33.9442	5.20307	13.0296
2012-01-21 18:51:16	-56.1748	-55.8432	12.9092	103.442	2.62468	33.9497	5.22536	13.0238
2012-01-21 18:52:16	-56.1775	-55.8427	12.8852	103.344	2.54714	33.9579	5.24798	13.0179
2012-01-21 18:53:17	-56.1802	-55.8424	12.8485	103.17	2.41187	33.9648	5.27692	13.0119
2012-01-21 18:54:17	-56.1828	-55.842	12.8211	103.075	2.3375	33.9681	5.30815	13.0059
2012-01-21 18:55:18	-56.1855	-55.8417	NaN	NaN	NaN	33.9704	5.38249	13
2012-01-21 18:56:18	-56.1883	-55.8414	NaN	NaN	NaN	33.9745	5.42417	12.9942
2012-01-21 18:57:19	-56.1911	-55.841	12.787	103.509	2.65772	33.9799	5.48801	12.9885
2012-01-21 18:58:19	-56.1939	-55.8406	12.7637	103.67	2.77606	33.9852	5.57816	12.9826
2012-01-21 18:59:20	-56.1967	-55.8398	NaN	NaN	NaN	33.9918	5.63392	12.9765
2012-01-21 19:00:20	-56.1995	-55.8385	NaN	NaN	NaN	33.9998	5.66216	12.9701
2012-01-21 19:01:20	-56.2023	-55.8373	NaN	NaN	NaN	34.007	5.71551	12.9638
2012-01-21 19:02:21	-56.2051	-55.8361	NaN	NaN	NaN	34.0142	5.75613	12.9575
2012-01-21 19:03:21	-56.208	-55.8348	12.6345	103.406	2.56191	34.02	5.77836	12.9512
2012-01-21 19:04:22	-56.2109	-55.8335	12.6134	103.333	2.50407	34.0243	5.80239	12.945
2012-01-21 19:05:22	-56.2139	-55.8322	12.5957	103.264	2.44918	34.0276	5.8205	12.9387
2012-01-21 19:06:23	-56.2168	-55.8309	12.5685	103.076	2.30627	34.0306	5.82869	12.9324
2012-01-21 19:07:23	-56.2198	-55.8297	12.5609	103.119	2.33586	34.0333	5.8554	12.926
2012-01-21 19:08:24	-56.2227	-55.8284	12.5281	102.932	2.19348	34.0354	5.87568	12.9197
2012-01-21 20:24:57	-56.4144	-55.5801	13.5343	100.04	0.0275911	33.7261	3.11904	12.2406
2012-01-21 20:25:57	-56.4169	-55.5765	13.6015	100.502	0.344064	33.7268	3.11037	12.2285
2012-01-21 20:26:57	-56.4194	-55.573	13.5144	99.8435	-0.106952	33.727	3.10436	12.2164
2012-01-21 20:27:58	-56.4219	-55.5696	13.5289	99.9321	-0.0462938	33.7272	3.0993	12.2044
2012-01-21 20:28:58	-56.4244	-55.5662	13.5024	99.7365	-0.179398	33.7266	3.09917	12.1923
2012-01-21 20:29:59	-56.427	-55.5627	13.5355	99.8986	-0.068939	33.7268	3.07772	12.1802
2012-01-21 20:30:59	-56.4296	-55.5593	13.5277	99.7708	-0.155525	33.726	3.05921	12.1681
2012-01-21 20:32:00	-56.4322	-55.556	13.5266	99.7306	-0.182422	33.7258	3.0492	12.1561
2012-01-21 20:33:00	-56.4348	-55.5526	13.6237	100.475	0.321352	33.7258	3.05764	12.1441
2012-01-21 20:34:01	-56.4374	-55.5492	13.6402	100.647	0.436391	33.7244	3.06966	12.132
2012-01-21 20:35:01	-56.4399	-55.5458	13.6336	100.534	0.359403	33.7232	3.05248	12.12
2012-01-21 20:36:02	-56.4424	-55.5424	13.6515	100.659	0.443251	33.7221	3.05087	12.108
2012-01-21 20:37:02	-56.4449	-55.5392	13.6399	100.491	0.329286	33.7226	3.02905	12.096
2012-01-21 20:38:02	-56.4474	-55.5357	13.6444	100.587	0.392767	33.7226	3.0442	12.0839
2012-01-21 20:39:03	-56.4499	-55.5321	13.6463	100.474	0.316723	33.7222	3.01144	12.0718
2012-01-21 20:40:03	-56.4523	-55.5287	13.6525	100.433	0.289026	33.7234	2.98964	12.0597
2012-01-21 20:41:04	-56.4548	-55.5253	NaN	NaN	NaN	33.7229	2.92254	12.0477
2012-01-21 20:42:04	-56.4572	-55.5219	NaN	NaN	NaN	33.7207	2.88594	12.0357
2012-01-21 20:43:05	-56.4597	-55.5186	13.6908	100.081	0.0537825	33.7188	2.82778	12.0237
2012-01-21 20:44:05	-56.4621	-55.5151	13.7049	100.116	0.0767554	33.7164	2.80982	12.0116
2012-01-21 20:45:06	-56.4646	-55.5117	13.7305	100.165	0.109002	33.7139	2.77401	11.9996
2012-01-21 20:46:06	-56.4671	-55.5083	13.7603	100.255	0.168631	33.7117	2.74177	11.9876
2012-01-21 20:47:07	-56.4696	-55.5048	13.7898	100.167	0.110417	33.7108	2.66393	11.9755
2012-01-21 20:48:07	-56.4721	-55.5013	13.8038	100.119	0.0786181	33.7105	2.6258	11.9634
2012-01-21 20:49:08	-56.4746	-55.4978	13.8351	100.21	0.138365	33.7077	2.59128	11.9513
2012-01-21 20:50:08	-56.4771	-55.4943	13.863	100.417	0.273493	33.7081	2.59206	11.9392
2012-01-21 20:51:08	-56.4796	-55.4908	13.9	100.606	0.397306	33.7045	2.57328	11.9271
2012-01-21 20:52:09	-56.4822	-55.4873	13.9185	100.599	0.391813	33.7038	2.5371	11.915
2012-01-21 20:53:09	-56.4848	-55.4838	13.943	100.741	0.483737	33.7026	2.52801	11.9029
2012-01-21 20:54:10	-56.4874	-55.4804	13.9557	100.873	0.568797	33.7043	2.53789	11.8908
2012-01-21 20:55:10	-56.49	-55.4769	13.9769	101.01	0.656842	33.7033	2.53373	11.8787
2012-01-21 20:56:11	-56.4926	-55.4734	13.9933	101.172	0.760855	33.7045	2.54472	11.8666
2012-01-21 20:57:11	-56.4952	-55.47	13.9898	101.164	0.753969	33.7046	2.54906	11.8545
2012-01-21 20:58:12	-56.4977	-55.4666	13.9997	101.191	0.770071	33.7034	2.53783	11.8424
2012-01-21 20:59:12	-56.5002	-55.4632	13.9964	101.113	0.718313	33.7045	2.52319	11.831
2012-01-21 21:00:12	-56.5027	-55.4597	13.9959	101.106	0.712256	33.7057	2.52175	11.8202
2012-01-21 21:01:13	-56.5053	-55.4562	13.9883	100.942	0.606257	33.7067	2.49393	11.8094
2012-01-21 21:02:13	-56.5078	-55.4526	13.992	100.813	0.521997	33.7075	2.45376	11.7986
2012-01-21 21:03:14	-56.5104	-55.4491	13.9976	100.873	0.559447	33.7078	2.45856	11.7879
2012-01-21 21:04:14	-56.513	-55.4456	14.0045	100.759	0.485785	33.7075	2.4175	11.7771
2012-01-21 21:05:15	-56.5156	-55.442	14.014	100.753	0.48113	33.7073	2.39834	11.7664
2012-01-21 21:06:15	-56.5182	-55.4385	14.029	100.903	0.576476	33.7061	2.40875	11.7556
2012-01-21 21:07:16	-56.5208	-55.435	14.0375	100.983	0.626042	33.704	2.41298	11.7449
2012-01-21 21:08:16	-56.5235	-55.4316	14.0533	100.961	0.611167	33.7033	2.37905	11.7342
2012-01-21 21:09:16	-56.5262	-55.4281	14.0518	100.969	0.615061	33.7035	2.38344	11.7235
2012-01-21 21:10:17	-56.5288	-55.4246	14.0466	101.133	0.717977	33.7029	2.43324	11.7128
2012-01-21 21:11:17	-56.5315	-55.4211	14.0506	101.353	0.855491	33.7028	2.4806	11.7021
2012-01-21 21:12:18	-56.5342	-55.4176	14.0473	101.431	0.903273	33.7031	2.50597	11.6915
2012-01-21 21:13:18	-56.5369	-55.4141	14.0378	101.424	0.896642	33.7047	2.51972	11.6807
2012-01-21 21:14:19	-56.5395	-55.4106	14.017	101.257	0.790152	33.7052	2.5153	11.67
2012-01-21 21:15:19	-56.5421	-55.4071	13.9955	101.05	0.658934	33.7056	2.50168	11.6593
2012-01-21 21:16:20	-56.5447	-55.4038	13.9825	101.081	0.677266	33.7076	2.53306	11.6486
2012-01-21 21:17:20	-56.5472	-55.4004	13.9826	101.079	0.674937	33.708	2.53154	11.6379
2012-01-21 21:18:20	-56.5498	-55.3969	13.9672	100.917	0.572811	33.709	2.51797	11.6272
2012-01-21 21:19:21	-56.5523	-55.3935	13.9684	100.916	0.571211	33.7096	2.51476	11.6165
2012-01-21 21:20:21	-56.5549	-55.3901	13.9646	100.889	0.552887	33.7103	2.51401	11.6058
2012-01-21 21:21:22	-56.5575	-55.3866	13.9703	100.924	0.574056	33.7117	2.51207	11.5951
2012-01-21 21:22:22	-56.5602	-55.383	13.9639	100.866	0.537048	33.7126	2.50849	11.5843
2012-01-21 21:23:23	-56.5628	-55.3794	13.9655	100.84	0.519675	33.7137	2.4982	11.5736
2012-01-21 21:24:23	-56.5655	-55.3758	13.9652	100.871	0.538096	33.7144	2.50621	11.5628
2012-01-21 21:25:24	-56.5682	-55.3723	13.9641	100.908	0.559963	33.7162	2.51681	11.5526
2012-01-21 21:26:24	-56.5708	-55.3687	13.9664	100.806	0.496085	33.7174	2.48664	11.5425
2012-01-21 21:27:24	-56.5735	-55.3651	13.9666	100.578	0.355617	33.7183	2.4281	11.5324
2012-01-21 21:28:25	-56.5762	-55.3616	13.9742	100.44	0.269967	33.7193	2.37873	11.5223
2012-01-21 21:29:25	-56.5789	-55.358	13.9788	100.349	0.214074	33.7196	2.34695	11.5122
2012-01-21 21:30:26	-56.5815	-55.3545	13.9933	100.338	0.206848	33.719	2.31734	11.5022
2012-01-21 21:31:26	-56.5841	-55.351	14.0192	100.391	0.239375	33.7179	2.28393	11.4921
2012-01-21 21:32:27	-56.5868	-55.3475	14.04	100.45	0.274838	33.7174	2.26122	11.482
2012-01-21 21:33:27	-56.5895	-55.344	14.0531	100.51	0.311069	33.7177	2.25282	11.4719
2012-01-21 21:34:28	-56.5922	-55.3405	14.0641	100.631	0.384212	33.7178	2.26318	11.4619
2012-01-21 21:35:28	-56.5948	-55.337	14.0889	101.048	0.636575	33.7182	2.32302	11.4518
2012-01-21 21:36:29	-56.5975	-55.3335	14.0978	101.44	0.872354	33.7203	2.40414	11.4417
2012-01-21 21:37:29	-56.6001	-55.33	14.0989	101.64	0.992006	33.7256	2.45095	11.4317
2012-01-21 21:38:29	-56.6028	-55.3265	14.0856	101.68	1.01409	33.7327	2.48331	11.4216
2012-01-21 21:39:30	-56.6055	-55.323	14.0533	101.467	0.884098	33.7393	2.48739	11.4115
2012-01-21 21:40:30	-56.6081	-55.3195	14.0093	101.16	0.697481	33.7453	2.48903	11.4015
2012-01-21 21:41:31	-56.6108	-55.316	13.9859	101.079	0.647742	33.7496	2.51046	11.3914
2012-01-21 21:42:31	-56.6134	-55.3126	13.9809	101.082	0.648769	33.7516	2.51995	11.3814
2012-01-21 21:43:32	-56.6161	-55.3091	13.9711	101.008	0.60295	33.7529	2.51783	11.3713
2012-01-21 21:44:32	-56.6187	-55.3056	13.9731	101.022	0.610717	33.7539	2.51712	11.3612
2012-01-21 21:45:33	-56.6214	-55.3021	13.974	101.029	0.613598	33.7552	2.51704	11.3511
2012-01-21 21:46:33	-56.624	-55.2986	13.9683	100.987	0.587661	33.7566	2.5162	11.3411
2012-01-21 21:47:33	-56.6267	-55.295	13.9623	100.915	0.543528	33.7563	2.50875	11.3296
2012-01-21 21:48:34	-56.6294	-55.2915	13.976	100.977	0.579276	33.7559	2.49951	11.3173
2012-01-21 21:49:34	-56.6321	-55.2881	13.9744	100.979	0.57914	33.7558	2.50248	11.3051
2012-01-21 21:50:35	-56.6347	-55.2847	13.982	100.997	0.588956	33.7549	2.49342	11.2929
2012-01-21 21:51:35	-56.6374	-55.2813	13.9863	100.939	0.553533	33.7544	2.47026	11.2806
2012-01-21 21:52:36	-56.64	-55.2778	13.9916	100.936	0.55066	33.754	2.45933	11.2684
2012-01-21 21:53:36	-56.6428	-55.2743	13.9907	100.925	0.543338	33.7541	2.45783	11.2561
2012-01-21 21:54:37	-56.6455	-55.2709	13.9911	100.932	0.545891	33.7534	2.45801	11.2439
2012-01-21 21:55:37	-56.6482	-55.2674	13.998	100.955	0.558478	33.7532	2.45051	11.2316
2012-01-21 21:56:38	-56.651	-55.264	13.9939	100.869	0.506999	33.7521	2.4358	11.2193
2012-01-21 21:57:38	-56.6537	-55.2606	13.9992	100.925	0.538515	33.7521	2.43961	11.2069
2012-01-21 21:58:38	-56.6564	-55.2572	13.9899	100.888	0.516104	33.7533	2.44608	11.1944
2012-01-21 21:59:39	-56.6592	-55.2538	NaN	NaN	NaN	33.7531	2.43847	11.1818
2012-01-21 22:00:39	-56.6619	-55.2503	NaN	NaN	NaN	33.7539	2.43693	11.1693
2012-01-21 22:01:40	-56.6646	-55.2469	13.993	100.874	0.504752	33.7541	2.43666	11.1567
2012-01-21 22:02:40	-56.6674	-55.2435	13.9857	100.796	0.458406	33.7558	2.42962	11.1442
2012-01-21 22:03:41	-56.6701	-55.24	13.9831	100.769	0.442096	33.757	2.42781	11.1316
2012-01-21 22:04:41	-56.6728	-55.2366	13.9913	100.839	0.481402	33.758	2.42949	11.1191
2012-01-21 22:05:42	-56.6756	-55.2332	13.9917	100.886	0.507281	33.7598	2.43934	11.1066
2012-01-21 22:06:42	-56.6783	-55.2299	NaN	NaN	NaN	33.7601	2.4233	11.0941
2012-01-21 22:07:42	-56.6811	-55.2266	NaN	NaN	NaN	33.7604	2.4025	11.0816
2012-01-21 22:08:43	-56.6837	-55.2232	13.9941	100.712	0.405349	33.7615	2.39087	11.0691
2012-01-21 22:09:43	-56.6865	-55.2198	14.0036	100.867	0.492285	33.7591	2.41208	11.0566
2012-01-21 22:10:44	-56.6892	-55.2165	14.0007	100.853	0.483432	33.7576	2.41408	11.0441
2012-01-21 22:11:44	-56.692	-55.213	14.0035	100.747	0.422242	33.7565	2.38253	11.0315
2012-01-21 22:12:45	-56.6947	-55.2096	14.0128	100.755	0.426109	33.7565	2.36749	11.019
2012-01-21 22:13:45	-56.6975	-55.2062	14.0162	100.767	0.431755	33.757	2.36393	11.0065
2012-01-21 22:14:46	-56.7003	-55.2029	14.0084	100.738	0.414744	33.7569	2.371	10.9939
2012-01-21 22:15:46	-56.7031	-55.1994	14.0127	100.856	0.479624	33.7571	2.39204	10.9814
2012-01-21 22:16:46	-56.706	-55.1959	14.0131	100.833	0.466016	33.7559	2.38512	10.9688
2012-01-21 22:17:47	-56.7089	-55.1925	14.0167	100.819	0.456917	33.755	2.37508	10.9562
2012-01-21 22:18:47	-56.7117	-55.189	14.0111	100.804	0.447868	33.7545	2.38132	10.9436
2012-01-21 22:19:48	-56.7146	-55.1856	14.011	100.779	0.433124	33.7538	2.37529	10.931
2012-01-21 22:20:48	-56.7175	-55.1821	14.0164	100.778	0.431714	33.754	2.36455	10.9184
2012-01-21 22:21:49	-56.7204	-55.1787	14.0125	100.821	0.454279	33.7541	2.38225	10.9059
2012-01-21 22:22:49	-56.7232	-55.1752	14.0062	100.749	0.413479	33.7545	2.3743	10.8933
2012-01-21 22:23:49	-56.726	-55.1719	14.0157	100.752	0.414466	33.7532	2.35782	10.8808
2012-01-21 22:24:50	-56.7289	-55.1685	14.0122	100.743	0.408738	33.7534	2.36199	10.8683
2012-01-21 22:25:50	-56.7318	-55.1651	14.0073	100.769	0.421991	33.7538	2.37674	10.8557
2012-01-21 22:26:51	-56.7347	-55.1617	NaN	NaN	NaN	33.7534	2.37418	10.8431
2012-01-21 22:27:51	-56.7376	-55.1583	NaN	NaN	NaN	33.7533	2.35683	10.8306
2012-01-21 22:28:52	-56.7405	-55.1549	14.0087	100.65	0.354398	33.7522	2.34258	10.818
2012-01-21 22:29:52	-56.7434	-55.1514	14.0137	100.648	0.352633	33.7533	2.33207	10.8054
2012-01-21 22:30:53	-56.7463	-55.1478	14.0107	100.629	0.341326	33.7529	2.33231	10.7927
2012-01-21 22:31:53	-56.7492	-55.1444	14.0171	100.663	0.358869	33.7529	2.32804	10.7801
2012-01-21 22:32:53	-56.7521	-55.1409	14.0148	100.611	0.329853	33.7535	2.31926	10.7676
2012-01-21 22:33:54	-56.755	-55.1375	14.023	100.602	0.324683	33.7523	2.30246	10.755
2012-01-21 22:34:54	-56.7578	-55.1339	14.0327	100.605	0.325464	33.754	2.28559	10.7423
2012-01-21 22:35:55	-56.7607	-55.1304	NaN	NaN	NaN	33.7537	2.28878	10.7297
2012-01-21 22:36:55	-56.7636	-55.1269	NaN	NaN	NaN	33.7539	2.28452	10.7171
2012-01-21 22:37:56	-56.7665	-55.1234	14.0444	100.651	0.348259	33.7556	2.27481	10.7051
2012-01-21 22:38:56	-56.7694	-55.12	14.0458	100.64	0.341535	33.757	2.26866	10.6937
2012-01-21 22:39:57	-56.7722	-55.1165	14.0564	100.676	0.359924	33.7598	2.25883	10.6823
2012-01-21 22:40:57	-56.7751	-55.113	14.0673	100.752	0.399533	33.7603	2.25833	10.6709
2012-01-21 22:41:57	-56.778	-55.1095	14.0762	100.838	0.444382	33.7611	2.26315	10.6595
2012-01-21 22:42:58	-56.7809	-55.106	14.073	100.753	0.398446	33.7612	2.24794	10.6481
2012-01-21 22:43:58	-56.7838	-55.1026	14.0804	100.893	0.471726	33.7625	2.26873	10.6367
2012-01-21 22:44:59	-56.7867	-55.0992	14.0798	100.824	0.434241	33.7631	2.25191	10.6253
2012-01-21 22:45:59	-56.7896	-55.0957	14.0925	100.953	0.501403	33.7644	2.26077	10.6139
2012-01-21 22:47:00	-56.7925	-55.0923	14.0896	100.912	0.478712	33.7662	2.255	10.6026
2012-01-21 22:48:00	-56.7954	-55.0888	14.0927	100.944	0.494621	33.7665	2.2576	10.5912
2012-01-21 22:49:00	-56.7984	-55.0853	14.006	100.383	0.199976	33.7672	2.27246	10.5798
2012-01-21 22:50:01	-56.8013	-55.0818	14.0944	101.008	0.52574	33.7698	2.26902	10.5684
2012-01-21 22:51:01	-56.8042	-55.0785	13.9827	100.18	0.093879	33.772	2.26225	10.557
2012-01-21 22:52:02	-56.8071	-55.075	14.0909	100.932	0.484421	33.7758	2.25417	10.5456
2012-01-21 22:52:36	-56.8087	-55.0731	14.0999	100.999	0.518377	33.7765	2.25417	10.5392
2012-01-21 23:06:31	-56.85	-55.0317	14.1816	100.71	0.359111	33.7852	2.03341	10.3896
2012-01-21 23:07:32	-56.8531	-55.0287	14.2015	100.892	0.450508	33.7858	2.04351	10.3797
2012-01-21 23:08:32	-56.8561	-55.0258	14.124	100.361	0.181833	33.7862	2.04812	10.3697
2012-01-21 23:09:32	-56.8592	-55.0228	14.0765	99.9763	-0.0119147	33.7861	2.03583	10.3597
2012-01-21 23:10:33	-56.8622	-55.0198	14.1561	100.649	0.326184	33.7874	2.06209	10.3497
2012-01-21 23:11:33	-56.8652	-55.0169	14.1165	100.467	0.234144	33.7897	2.0862	10.3397
2012-01-21 23:12:34	-56.8682	-55.014	14.2039	101.224	0.612105	33.7913	2.11897	10.3297
2012-01-21 23:13:34	-56.8712	-55.0111	14.2032	101.522	0.759496	33.792	2.19398	10.3197
2012-01-21 23:14:34	-56.8742	-55.0083	14.1939	101.78	0.885994	33.7918	2.27442	10.3097
2012-01-21 23:15:35	-56.8772	-55.0054	14.1963	102.168	1.07642	33.7916	2.3656	10.299
2012-01-21 23:16:35	-56.8802	-55.0026	14.0051	100.956	0.473815	33.7887	2.40651	10.288
2012-01-21 23:17:36	-56.8833	-54.9997	14.1264	101.922	0.950078	33.7853	2.42996	10.2769
2012-01-21 23:18:36	-56.8863	-54.9968	14.0283	101.338	0.660222	33.785	2.46063	10.2659
2012-01-21 23:19:37	-56.8893	-54.9939	14.0321	101.378	0.678468	33.7863	2.46276	10.2548
2012-01-21 23:20:37	-56.8922	-54.9911	14.0221	101.298	0.637774	33.7876	2.4599	10.2438
2012-01-21 23:21:37	-56.8952	-54.9883	13.9486	100.789	0.38701	33.7886	2.46505	10.2328
2012-01-21 23:22:38	-56.8982	-54.9855	13.9415	100.737	0.360572	33.7889	2.4643	10.2218
2012-01-21 23:23:38	-56.9011	-54.9826	13.9898	101.171	0.5718	33.7895	2.48462	10.2108
2012-01-21 23:24:39	-56.9042	-54.9797	13.9671	101.139	0.554785	33.7906	2.51687	10.1998
2012-01-21 23:25:39	-56.9072	-54.9769	13.9735	101.309	0.636216	33.7915	2.54794	10.1887
2012-01-21 23:26:40	-56.9103	-54.9739	13.9423	101.196	0.57996	33.7896	2.5762	10.1777
2012-01-21 23:27:40	-56.9133	-54.9711	13.881	100.833	0.40303	33.7855	2.59628	10.1667
2012-01-21 23:28:41	-56.9164	-54.9682	13.9121	101.086	0.524217	33.783	2.60281	10.1557
2012-01-21 23:29:41	-56.9195	-54.9654	13.9361	101.302	0.627118	33.7835	2.61312	10.1447
2012-01-21 23:30:41	-56.9225	-54.9626	13.8464	100.688	0.330876	33.7826	2.62273	10.1336
2012-01-21 23:31:42	-56.9256	-54.9597	13.8777	100.977	0.468911	33.7822	2.63791	10.1226
2012-01-21 23:32:42	-56.9287	-54.9569	13.8158	100.522	0.250125	33.7824	2.63563	10.1116
2012-01-21 23:33:43	-56.9317	-54.9541	13.8387	100.699	0.334047	33.7824	2.63789	10.1006
2012-01-21 23:34:43	-56.9347	-54.9513	13.8487	100.753	0.359026	33.7816	2.63275	10.0896
2012-01-22 00:22:00	-57.0806	-54.8164	13.9026	100.965	0.449307	33.7853	2.56417	9.96471
2012-01-22 00:23:00	-57.0837	-54.8136	13.9007	101.014	0.472959	33.7849	2.57987	9.97168
2012-01-22 00:24:00	-57.0868	-54.8107	13.904	100.94	0.438749	33.7862	2.55506	9.97868
2012-01-22 00:25:01	-57.0899	-54.8078	NaN	NaN	NaN	33.786	2.56047	9.98568
2012-01-22 00:26:01	-57.0931	-54.805	NaN	NaN	NaN	33.7855	2.58533	9.99267
2012-01-22 00:27:01	-57.0962	-54.8021	13.8874	100.876	0.410509	33.7861	2.5667	9.99967
2012-01-22 00:28:02	-57.0993	-54.7993	13.8941	101.031	0.483773	33.786	2.59283	10.0067
2012-01-22 00:29:02	-57.1025	-54.7964	13.8898	100.947	0.444955	33.7852	2.5794	10.0137
2012-01-22 00:30:03	-57.1057	-54.7935	13.8752	100.794	0.373595	33.7856	2.56714	10.0207
2012-01-22 00:31:03	-57.1088	-54.7907	13.879	100.852	0.401485	33.7854	2.57583	10.0277
2012-01-22 00:32:03	-57.1119	-54.7878	NaN	NaN	NaN	33.7854	2.5766	10.0347
2012-01-22 00:33:04	-57.1151	-54.7849	NaN	NaN	NaN	33.7847	2.58714	10.0417
2012-01-22 00:34:04	-57.1183	-54.7819	13.8743	100.844	0.399234	33.7847	2.5823	10.0487
2012-01-22 00:35:05	-57.1215	-54.7789	13.876	100.843	0.399066	33.7848	2.57877	10.0557
2012-01-22 00:36:05	-57.1247	-54.776	13.8778	100.81	0.384238	33.7856	2.56654	10.0627
2012-01-22 00:37:06	-57.1278	-54.7731	13.8741	100.814	0.386415	33.785	2.57426	10.0706
2012-01-22 00:38:06	-57.131	-54.7701	13.8766	100.86	0.408792	33.7855	2.58043	10.0787
2012-01-22 00:39:06	-57.1341	-54.7672	13.8767	100.804	0.382734	33.7866	2.56506	10.0868
2012-01-22 00:40:07	-57.1373	-54.7641	13.8759	100.856	0.40844	33.7852	2.57935	10.0948
2012-01-22 00:41:07	-57.1405	-54.7611	13.8821	100.935	0.446763	33.7857	2.58785	10.1029
2012-01-22 00:42:08	-57.1436	-54.7583	13.8801	100.951	0.454907	33.7842	2.59549	10.1109
2012-01-22 00:43:08	-57.1468	-54.7553	13.8791	100.938	0.449521	33.7849	2.59298	10.119
2012-01-22 00:44:09	-57.1498	-54.7523	13.8816	100.947	0.454113	33.7842	2.59096	10.127
2012-01-22 00:45:09	-57.1529	-54.7493	13.8756	100.903	0.433885	33.786	2.59035	10.135
2012-01-22 00:46:09	-57.1561	-54.7463	13.8721	100.854	0.410722	33.7856	2.58347	10.1431
2012-01-22 00:47:10	-57.1592	-54.7434	13.878	100.901	0.434227	33.7851	2.58417	10.1514
2012-01-22 00:48:10	-57.1624	-54.7404	13.8699	100.841	0.405824	33.7856	2.58342	10.1598
2012-01-22 00:49:11	-57.1656	-54.7375	13.8742	100.852	0.411633	33.7864	2.57752	10.1682
2012-01-22 00:50:11	-57.1688	-54.7345	13.8832	100.87	0.421242	33.7865	2.56602	10.1766
2012-01-22 00:51:12	-57.1721	-54.7314	13.8827	100.85	0.412027	33.7868	2.56132	10.185
2012-01-22 00:52:12	-57.1753	-54.7284	13.8799	100.799	0.387843	33.7872	2.55316	10.1934
2012-01-22 00:53:12	-57.1784	-54.7254	13.882	100.791	0.38456	33.7876	2.54727	10.2018
2012-01-22 00:54:13	-57.1816	-54.7225	13.8903	100.759	0.36977	33.7886	2.52369	10.2102
2012-01-22 00:55:13	-57.1848	-54.7195	13.8874	100.665	0.324325	33.7885	2.50539	10.2186
2012-01-22 00:56:14	-57.188	-54.7165	13.8931	100.655	0.320011	33.7894	2.49164	10.227
2012-01-22 00:57:14	-57.1912	-54.7136	13.8961	100.567	0.277842	33.79	2.46393	10.2354
2012-01-22 00:58:14	-57.1944	-54.7106	13.9051	100.526	0.258108	33.7903	2.43771	10.2438
2012-01-22 00:59:15	-57.1976	-54.7077	13.9079	100.443	0.217476	33.7909	2.41134	10.2522
2012-01-22 01:00:15	-57.2008	-54.7047	13.9238	100.463	0.22812	33.7907	2.38714	10.2606
2012-01-22 01:01:16	-57.204	-54.7018	13.9439	100.478	0.235877	33.7905	2.35448	10.269
2012-01-22 01:02:16	-57.2073	-54.6989	13.9525	100.53	0.261699	33.7902	2.35176	10.2774
2012-01-22 01:03:17	-57.2104	-54.696	13.9672	100.615	0.304279	33.7897	2.34613	10.2858
2012-01-22 01:04:17	-57.2136	-54.693	13.9841	100.626	0.310233	33.7882	2.31785	10.2941
2012-01-22 01:05:17	-57.2167	-54.6902	14.0033	100.697	0.345883	33.7872	2.30006	10.3025
2012-01-22 01:06:18	-57.2198	-54.6872	14.0109	100.749	0.372347	33.7865	2.29912	10.3108
2012-01-22 01:07:18	-57.2229	-54.6844	14.0233	100.772	0.384085	33.7854	2.28286	10.3192
2012-01-22 01:08:18	-57.2261	-54.6816	14.0335	100.799	0.398446	33.7853	2.27066	10.3275
2012-01-22 01:09:19	-57.2292	-54.6787	14.0403	100.804	0.401553	33.7849	2.25941	10.3359
2012-01-22 01:10:19	-57.2324	-54.6758	14.0499	100.762	0.381226	33.7849	2.23238	10.3443
2012-01-22 01:11:20	-57.2355	-54.6728	14.0603	100.718	0.359952	33.7847	2.20386	10.3527
2012-01-22 01:12:20	-57.2387	-54.6699	14.0632	100.692	0.347261	33.7843	2.19186	10.361
2012-01-22 01:13:20	-57.2419	-54.667	14.0673	100.712	0.357832	33.7832	2.18845	10.3694
2012-01-22 01:14:21	-57.2451	-54.6641	14.0771	100.796	0.400638	33.7805	2.19185	10.3778
2012-01-22 01:15:21	-57.2482	-54.6612	14.0841	100.819	0.412814	33.7783	2.18525	10.3862
2012-01-22 01:16:22	-57.2514	-54.6583	14.0955	100.871	0.439692	33.7765	2.17833	10.3945
2012-01-22 01:17:22	-57.2546	-54.6553	14.1041	100.942	0.476189	33.7753	2.18083	10.4029
2012-01-22 01:18:22	-57.2578	-54.6523	14.104	100.971	0.491779	33.7747	2.18785	10.4113
2012-01-22 01:19:23	-57.261	-54.6493	14.1071	101.019	0.517061	33.774	2.19379	10.4197
2012-01-22 01:20:23	-57.2642	-54.6463	14.1041	101.004	0.510095	33.7737	2.19452	10.4281
2012-01-22 01:21:24	-57.2674	-54.6433	14.0943	100.947	0.481628	33.7744	2.19783	10.4365
2012-01-22 01:22:24	-57.2705	-54.6403	14.1012	100.984	0.501441	33.7736	2.19465	10.4449
2012-01-22 01:23:24	-57.2737	-54.6374	14.0973	100.901	0.45991	33.7724	2.18143	10.4533
2012-01-22 01:24:25	-57.2769	-54.6344	14.1116	101.045	0.534107	33.7718	2.19212	10.4617
2012-01-22 01:25:25	-57.2801	-54.6315	14.1112	101.051	0.538103	33.7718	2.19338	10.4701
2012-01-22 01:26:25	-57.2833	-54.6285	14.1031	100.93	0.476457	33.7716	2.17648	10.4785
2012-01-22 01:27:26	-57.2865	-54.6255	14.0944	100.845	0.43376	33.7717	2.17043	10.4869
2012-01-22 01:28:26	-57.2897	-54.6225	14.1066	100.949	0.488069	33.7717	2.17454	10.4956
2012-01-22 01:29:27	-57.2928	-54.6196	14.1074	100.99	0.509643	33.7718	2.18332	10.5043
2012-01-22 01:30:27	-57.296	-54.6168	14.1051	101.04	0.536096	33.7716	2.19948	10.513
2012-01-22 01:31:28	-57.2992	-54.6138	14.1137	101.137	0.58733	33.7715	2.20784	10.5217
2012-01-22 01:32:28	-57.3024	-54.6109	14.1035	101.113	0.575793	33.7718	2.21905	10.5305
2012-01-22 01:33:28	-57.3056	-54.608	14.1089	101.221	0.632384	33.7716	2.23602	10.5392
2012-01-22 01:34:29	-57.3088	-54.605	14.1081	101.255	0.650701	33.7715	2.24535	10.5479
2012-01-22 01:35:29	-57.312	-54.6021	14.11	101.275	0.662259	33.7713	2.24668	10.5566
2012-01-22 01:36:30	-57.3151	-54.5992	14.1077	101.289	0.670843	33.7719	2.2542	10.5654
2012-01-22 01:37:30	-57.3183	-54.5962	14.102	101.29	0.672053	33.7727	2.26376	10.5741
2012-01-22 01:38:30	-57.3215	-54.5932	14.1021	101.289	0.672701	33.7732	2.26244	10.5829
2012-01-22 01:39:31	-57.3248	-54.5902	14.1006	101.309	0.683951	33.7737	2.26912	10.5916
2012-01-22 01:40:31	-57.328	-54.5872	14.0994	101.37	0.716828	33.774	2.2855	10.6004
2012-01-22 01:41:32	-57.3312	-54.5843	14.1004	101.463	0.76689	33.773	2.30719	10.6091
2012-01-22 01:42:32	-57.3344	-54.5814	14.0966	101.495	0.784684	33.7729	2.32143	10.6179
2012-01-22 01:43:33	-57.3377	-54.5786	14.0923	101.459	0.766619	33.7733	2.31921	10.6266
2012-01-22 01:44:33	-57.3409	-54.5757	14.0881	101.432	0.753985	33.7732	2.31955	10.6353
2012-01-22 01:45:33	-57.3441	-54.5728	14.0854	101.408	0.742398	33.7737	2.31733	10.644
2012-01-22 01:46:34	-57.3473	-54.57	14.0808	101.374	0.725248	33.7745	2.31619	10.6527
2012-01-22 01:47:34	-57.3504	-54.5671	14.0758	101.365	0.72179	33.7743	2.32267	10.6614
2012-01-22 01:48:35	-57.3536	-54.5643	14.0828	101.452	0.768868	33.7735	2.33218	10.6701
2012-01-22 01:49:35	-57.3567	-54.5615	14.0801	101.434	0.76036	33.7737	2.33272	10.6788
2012-01-22 01:50:35	-57.3599	-54.5586	14.0689	101.393	0.739758	33.774	2.34198	10.6875
2012-01-22 01:51:36	-57.363	-54.5557	14.0668	101.434	0.762898	33.774	2.35505	10.6962
2012-01-22 01:52:36	-57.3662	-54.5528	14.0702	101.486	0.791705	33.7732	2.36088	10.7049
2012-01-22 01:53:37	-57.3693	-54.55	14.0641	101.464	0.781123	33.7723	2.36559	10.7136
2012-01-22 01:54:37	-57.3725	-54.547	14.0563	101.394	0.744705	33.7721	2.36072	10.7224
2012-01-22 01:55:37	-57.3757	-54.5442	14.0538	101.393	0.745348	33.7716	2.36405	10.7301
2012-01-22 01:56:38	-57.3788	-54.5413	14.0485	101.344	0.719646	33.7716	2.36034	10.7346
2012-01-22 01:57:38	-57.3819	-54.5385	14.0537	101.4	0.74991	33.7723	2.36443	10.739
2012-01-22 01:58:39	-57.3851	-54.5357	14.0509	101.431	0.767086	33.7726	2.3773	10.7435
2012-01-22 01:59:39	-57.3882	-54.5328	14.0518	101.47	0.788484	33.7731	2.38496	10.7479
2012-01-22 02:00:39	-57.3914	-54.53	14.0516	101.589	0.852879	33.7722	2.41436	10.7523
2012-01-22 02:01:40	-57.3946	-54.5271	14.0529	101.712	0.919509	33.7697	2.44287	10.7567
2012-01-22 02:02:40	-57.3978	-54.5243	14.0493	101.798	0.966243	33.7678	2.4709	10.7611
2012-01-22 02:03:41	-57.401	-54.5214	14.0381	101.788	0.96128	33.7663	2.48825	10.7655
2012-01-22 02:04:41	-57.4042	-54.5185	14.0223	101.7	0.91478	33.7646	2.49455	10.7699
2012-01-22 02:05:41	-57.4074	-54.5156	14.0014	101.483	0.798438	33.7634	2.47781	10.7743
2012-01-22 02:06:42	-57.4106	-54.5128	13.9945	101.335	0.719795	33.7635	2.45356	10.7787
2012-01-22 02:07:42	-57.4138	-54.5098	13.9848	101.213	0.654481	33.7655	2.43956	10.7831
2012-01-22 02:08:42	-57.417	-54.507	13.9838	101.194	0.644607	33.7687	2.43488	10.7875
2012-01-22 02:09:43	-57.4201	-54.5041	13.9914	101.2	0.648632	33.7706	2.42154	10.7919
2012-01-22 02:10:43	-57.4233	-54.5012	14.0056	101.291	0.698304	33.7706	2.41667	10.7963
2012-01-22 02:11:43	-57.4264	-54.4984	NaN	NaN	NaN	33.7701	2.4075	10.8007
2012-01-22 02:12:44	-57.4296	-54.4957	NaN	NaN	NaN	33.7696	2.42757	10.8052
2012-01-22 02:13:44	-57.4327	-54.4929	14.0189	101.609	0.871482	33.7689	2.46999	10.8096
2012-01-22 02:14:45	-57.4359	-54.49	14.0186	101.687	0.914753	33.7662	2.49043	10.8139
2012-01-22 02:15:45	-57.4391	-54.4872	14.0184	101.72	0.932839	33.7631	2.49901	10.8183
2012-01-22 02:16:45	-57.4423	-54.4842	14.0055	101.607	0.872679	33.762	2.49448	10.8227
2012-01-22 02:17:46	-57.4455	-54.4813	13.9914	101.43	0.777091	33.7616	2.47523	10.8271
2012-01-22 02:18:46	-57.4487	-54.4784	13.9784	101.191	0.647594	33.7632	2.43778	10.8315
2012-01-22 02:19:46	-57.4519	-54.4755	13.9743	100.876	0.477242	33.7699	2.36472	10.8359
2012-01-22 02:20:47	-57.4551	-54.4725	13.9788	100.612	0.333737	33.7799	2.28843	10.8403
2012-01-22 02:21:47	-57.4583	-54.4696	13.9954	100.66	0.360068	33.7849	2.2692	10.8448
2012-01-22 02:22:47	-57.4615	-54.4667	14.0196	100.725	0.395732	33.7841	2.2424	10.8492
2012-01-22 02:23:48	-57.4647	-54.4638	14.0538	100.996	0.544238	33.7818	2.24992	10.8536
2012-01-22 02:24:48	-57.4678	-54.4609	NaN	NaN	NaN	33.7795	2.25063	10.858
2012-01-22 02:25:49	-57.4709	-54.458	NaN	NaN	NaN	33.7785	2.21795	10.8625
2012-01-22 02:26:49	-57.4741	-54.455	14.091	101.184	0.648761	33.7783	2.23147	10.8669
2012-01-22 02:27:49	-57.4772	-54.4521	14.0919	101.134	0.622079	33.7793	2.2164	10.8714
2012-01-22 02:28:50	-57.4804	-54.4492	14.0933	101.102	0.604929	33.7797	2.2055	10.8789
2012-01-22 02:29:50	-57.4836	-54.4463	14.0856	101.056	0.580912	33.7801	2.20628	10.8872
2012-01-22 02:30:51	-57.4868	-54.4434	14.0994	101.186	0.652926	33.7805	2.21378	10.8953
2012-01-22 02:31:51	-57.4899	-54.4406	14.1032	101.224	0.674958	33.7806	2.215	10.9035
2012-01-22 02:32:52	-57.493	-54.4378	14.1089	101.313	0.724904	33.7815	2.22584	10.9116
2012-01-22 02:33:52	-57.4962	-54.4349	14.1045	101.236	0.683337	33.7814	2.21293	10.9198
2012-01-22 02:34:52	-57.4993	-54.432	14.1116	101.329	0.735846	33.7813	2.22258	10.928
2012-01-22 02:35:53	-57.5025	-54.4292	14.1098	101.343	0.744598	33.7808	2.2286	10.9361
2012-01-22 02:36:53	-57.5056	-54.4263	NaN	NaN	NaN	33.7802	2.23661	10.9443
2012-01-22 02:37:53	-57.5088	-54.4234	NaN	NaN	NaN	33.7804	2.23975	10.9525
2012-01-22 02:38:54	-57.512	-54.4205	14.1082	101.436	0.799156	33.78	2.2566	10.9607
2012-01-22 02:39:54	-57.5152	-54.4176	14.1068	101.435	0.799987	33.7793	2.26061	10.9689
2012-01-22 02:40:55	-57.5184	-54.4148	14.1037	101.432	0.799287	33.7786	2.26542	10.977
2012-01-22 02:41:55	-57.5215	-54.412	14.1037	101.441	0.805504	33.7774	2.26891	10.9852
2012-01-22 02:42:55	-57.5247	-54.4091	14.1057	101.414	0.791643	33.7782	2.25754	10.9934
2012-01-22 02:43:56	-57.5278	-54.4062	14.1049	101.557	0.872702	33.7789	2.29412	11.0016
2012-01-22 02:44:56	-57.5311	-54.4034	14.0952	101.616	0.906784	33.7805	2.32497	11.0098
2012-01-22 02:45:57	-57.5343	-54.4005	14.1003	101.73	0.971736	33.781	2.3433	11.018
2012-01-22 02:46:57	-57.5375	-54.3976	14.0917	101.72	0.967393	33.784	2.35534	11.0262
2012-01-22 02:47:57	-57.5407	-54.3947	14.082	101.673	0.942194	33.785	2.36146	11.0344
2012-01-22 02:48:58	-57.5439	-54.3919	14.0704	101.61	0.908305	33.7862	2.36895	11.0426
2012-01-22 02:49:58	-57.5471	-54.3891	14.0717	101.634	0.92294	33.7855	2.3708	11.0508
2012-01-22 02:50:59	-57.5503	-54.3861	14.0575	101.592	0.900359	33.7823	2.38561	11.059
2012-01-22 02:51:59	-57.5535	-54.3833	NaN	NaN	NaN	33.7802	2.40487	11.0673
2012-01-22 02:53:00	-57.5568	-54.3804	14.0559	101.702	0.965163	33.781	2.41666	11.0755
2012-01-22 02:54:00	-57.5601	-54.3775	14.0553	101.681	0.954675	33.7837	2.41242	11.0838
2012-01-22 02:55:00	-57.5633	-54.3746	14.0399	101.535	0.872893	33.7864	2.40233	11.092
2012-01-22 02:56:01	-57.5665	-54.3717	14.0422	101.515	0.862475	33.7855	2.39223	11.1001
2012-01-22 02:57:01	-57.5696	-54.3689	14.0502	101.676	0.955286	33.7862	2.41686	11.1081
2012-01-22 02:58:02	-57.5728	-54.366	14.0441	101.659	0.947014	33.7858	2.42306	11.1162
2012-01-22 02:59:02	-57.576	-54.3631	14.0467	101.653	0.944709	33.7858	2.41629	11.1243
2012-01-22 03:00:02	-57.5792	-54.3603	14.0415	101.661	0.950648	33.7859	2.42679	11.1323
2012-01-22 03:01:03	-57.5824	-54.3574	14.0366	101.649	0.94521	33.7864	2.42921	11.1404
2012-01-22 03:02:03	-57.5856	-54.3545	14.034	101.651	0.947323	33.7865	2.43227	11.1485
2012-01-22 03:03:04	-57.5889	-54.3517	NaN	NaN	NaN	33.7858	2.46927	11.1566
2012-01-22 03:04:04	-57.5922	-54.3487	NaN	NaN	NaN	33.7842	2.5162	11.1648
2012-01-22 03:05:05	-57.5955	-54.3458	14.0316	102.065	1.1891	33.7736	2.54351	11.1729
2012-01-22 03:06:05	-57.5988	-54.3429	14.0209	102.142	1.23485	33.7617	2.5841	11.1811
2012-01-22 03:07:06	-57.602	-54.34	13.9923	102.088	1.2054	33.7592	2.62253	11.1892
2012-01-22 03:08:06	-57.6053	-54.3372	13.9646	102.148	1.24068	33.7568	2.68753	11.1973
2012-01-22 03:09:06	-57.6086	-54.3343	13.942	102.152	1.24446	33.7535	2.73003	11.2055
2012-01-22 03:10:07	-57.6118	-54.3314	13.9292	102.089	1.20953	33.7498	2.73849	11.2136
2012-01-22 03:11:07	-57.6151	-54.3285	13.8998	101.929	1.11823	33.75	2.75135	11.2217
2012-01-22 03:12:08	-57.6183	-54.3256	13.8669	101.681	0.976038	33.7501	2.74995	11.2298
2012-01-22 03:13:08	-57.6215	-54.3227	13.8564	101.609	0.935517	33.7525	2.75147	11.2379
2012-01-22 03:14:08	-57.6248	-54.3198	13.8439	101.429	0.832189	33.7529	2.72754	11.246
2012-01-22 03:15:09	-57.6281	-54.3168	13.8441	101.402	0.816844	33.7532	2.71783	11.2503
2012-01-22 03:16:09	-57.6313	-54.3139	13.844	101.499	0.873541	33.753	2.73928	11.2542
2012-01-22 03:17:10	-57.6346	-54.3111	13.8488	101.478	0.862026	33.753	2.72347	11.2582
2012-01-22 03:18:10	-57.6379	-54.3082	13.848	101.481	0.86459	33.7531	2.72632	11.2622
2012-01-22 03:19:10	-57.6411	-54.3053	13.8488	101.447	0.845069	33.7526	2.71592	11.2661
2012-01-22 03:20:11	-57.6444	-54.3024	13.8481	101.424	0.832105	33.7521	2.71127	11.2701
2012-01-22 03:21:11	-57.6476	-54.2995	13.8504	101.377	0.805483	33.7519	2.69515	11.274
2012-01-22 03:22:11	-57.6509	-54.2966	13.8468	101.17	0.684871	33.7525	2.64984	11.278
2012-01-22 03:23:12	-57.6542	-54.2936	13.8473	101.212	0.710046	33.7558	2.65918	11.282
2012-01-22 03:24:12	-57.6575	-54.2906	NaN	NaN	NaN	33.7625	2.70061	11.2859
2012-01-22 03:25:13	-57.6607	-54.2874	NaN	NaN	NaN	33.7657	2.70989	11.29
2012-01-22 03:26:13	-57.6639	-54.2844	13.867	101.592	0.933816	33.7646	2.71361	11.294
2012-01-22 03:27:13	-57.6672	-54.2814	13.8639	101.612	0.946613	33.7643	2.72456	11.298
2012-01-22 03:28:14	-57.6704	-54.2783	13.8451	101.57	0.922205	33.7644	2.74853	11.302
2012-01-22 03:29:14	-57.6737	-54.2752	13.841	101.561	0.917269	33.7642	2.75339	11.306
2012-01-22 03:30:14	-57.6769	-54.2723	13.8338	101.561	0.917961	33.7633	2.76708	11.31
2012-01-22 03:31:15	-57.6801	-54.2693	13.8271	101.524	0.896794	33.7626	2.76876	11.314
2012-01-22 03:32:15	-57.6834	-54.2663	13.8268	101.57	0.924543	33.7622	2.77978	11.3179
2012-01-22 03:33:16	-57.6867	-54.2633	13.8223	101.722	1.01392	33.7608	2.82558	11.3219
2012-01-22 03:34:16	-57.69	-54.2602	13.8114	101.925	1.13388	33.7577	2.89745	11.3259
2012-01-22 03:35:16	-57.6933	-54.2572	13.7963	102.129	1.25459	33.7504	2.97685	11.3299
2012-01-22 03:36:17	-57.6965	-54.2542	13.7814	102.271	1.33833	33.7441	3.03962	11.3339
2012-01-22 03:37:17	-57.6997	-54.2512	13.7465	102.177	1.28343	33.7396	3.08054	11.3379
2012-01-22 03:38:18	-57.703	-54.2483	13.715	102.072	1.22238	33.7384	3.11217	11.3418
2012-01-22 03:39:18	-57.7063	-54.2453	13.6795	101.811	1.06914	33.7399	3.11204	11.3458
2012-01-22 03:40:19	-57.7096	-54.2422	13.6513	101.64	0.968533	33.7413	3.11999	11.3498
2012-01-22 03:41:19	-57.7129	-54.2391	13.6257	101.538	0.908669	33.7426	3.14036	11.3538
2012-01-22 03:42:19	-57.7161	-54.2361	13.6194	101.48	0.875123	33.7426	3.13693	11.3577
2012-01-22 03:43:20	-57.7194	-54.233	NaN	NaN	NaN	33.7417	3.13996	11.3617
2012-01-22 03:44:20	-57.7227	-54.23	NaN	NaN	NaN	33.7417	3.14075	11.3657
2012-01-22 03:45:21	-57.726	-54.2269	13.6106	101.485	0.879785	33.7417	3.1543	11.3697
2012-01-22 03:46:21	-57.7293	-54.2238	13.604	101.441	0.853996	33.7413	3.15559	11.3737
2012-01-22 03:47:21	-57.7324	-54.2208	NaN	NaN	NaN	33.7415	3.15191	11.3777
2012-01-22 03:48:22	-57.7356	-54.2177	NaN	NaN	NaN	33.7409	3.16226	11.3818
2012-01-22 03:49:22	-57.7388	-54.2146	13.5998	101.518	0.901117	33.7396	3.18084	11.3858
2012-01-22 03:50:23	-57.742	-54.2116	13.5859	101.519	0.90225	33.7393	3.20614	11.3898
2012-01-22 03:51:23	-57.7452	-54.2085	13.5859	101.59	0.944896	33.7396	3.22283	11.3938
2012-01-22 03:52:24	-57.7485	-54.2055	13.5855	101.602	0.952613	33.7396	3.22667	11.3978
2012-01-22 03:53:24	-57.7518	-54.2024	13.5787	101.591	0.946869	33.7397	3.23574	11.4018
2012-01-22 03:54:24	-57.755	-54.1993	13.5682	101.539	0.916042	33.74	3.24063	11.4058
2012-01-22 03:55:25	-57.7583	-54.1961	13.566	101.527	0.909727	33.7399	3.24092	11.4098
2012-01-22 03:56:25	-57.7616	-54.193	13.5584	101.472	0.877502	33.7395	3.24155	11.4138
2012-01-22 03:57:26	-57.7648	-54.1898	13.5574	101.449	0.864351	33.7399	3.23808	11.4179
2012-01-22 03:58:26	-57.768	-54.1866	13.5532	101.378	0.822673	33.7404	3.22854	11.4219
2012-01-22 03:59:27	-57.7713	-54.1835	13.5514	101.345	0.803479	33.741	3.22284	11.4259
2012-01-22 04:00:27	-57.7745	-54.1803	13.5453	101.296	0.774741	33.7415	3.22071	11.4299
2012-01-22 04:01:27	-57.7777	-54.1772	13.5568	101.331	0.796307	33.7415	3.20662	11.434
2012-01-22 04:02:29	-57.781	-54.1741	13.5534	101.295	0.775021	33.7415	3.20368	11.438
2012-01-22 04:03:31	-57.7843	-54.171	13.5603	101.333	0.798663	33.7413	3.20019	11.4421
2012-01-22 04:04:33	-57.7877	-54.1678	13.562	101.334	0.799559	33.7418	3.19463	11.4463
2012-01-22 04:05:35	-57.791	-54.1646	13.5676	101.399	0.838747	33.7425	3.19794	11.4504
2012-01-22 04:06:36	-57.7943	-54.1614	13.5668	101.377	0.826557	33.7421	3.19446	11.4544
2012-01-22 04:07:36	-57.7975	-54.1583	13.5653	101.36	0.816801	33.7425	3.19337	11.459
2012-01-22 04:08:37	-57.8007	-54.1552	13.5741	101.421	0.854244	33.7428	3.19243	11.4653
2012-01-22 04:09:37	-57.804	-54.1521	13.5732	101.45	0.87258	33.7425	3.20124	11.4716
2012-01-22 04:10:37	-57.8072	-54.1489	13.5742	101.453	0.875358	33.7416	3.20014	11.4779
2012-01-22 04:11:38	-57.8104	-54.1458	13.5713	101.436	0.866165	33.7408	3.20222	11.4843
2012-01-22 04:12:38	-57.8136	-54.1427	13.5737	101.488	0.898551	33.7408	3.21014	11.4906
2012-01-22 04:13:39	-57.8169	-54.1395	13.5736	101.495	0.903375	33.7407	3.20869	11.4969
2012-01-22 04:14:39	-57.8201	-54.1364	13.5661	101.449	0.87643	33.7402	3.20942	11.5032
2012-01-22 04:15:40	-57.8234	-54.1333	13.5639	101.418	0.858461	33.7399	3.20639	11.5096
2012-01-22 04:16:40	-57.8266	-54.1302	13.5611	101.354	0.820965	33.7399	3.1963	11.5159
2012-01-22 04:17:40	-57.8299	-54.127	13.5578	101.321	0.801618	33.7393	3.1942	11.5222
2012-01-22 04:18:41	-57.8331	-54.1238	13.5596	101.322	0.802899	33.7399	3.19098	11.5284
2012-01-22 04:19:41	-57.8363	-54.1207	13.5619	101.356	0.824598	33.7405	3.19438	11.5345
2012-01-22 04:20:42	-57.8396	-54.1176	13.5618	101.331	0.809791	33.7408	3.1873	11.5405
2012-01-22 04:21:42	-57.8428	-54.1146	13.564	101.371	0.834981	33.7396	3.1928	11.5465
2012-01-22 04:22:43	-57.846	-54.1114	13.5714	101.381	0.842185	33.7395	3.18114	11.5525
2012-01-22 04:23:43	-57.8493	-54.1083	13.5669	101.274	0.777551	33.7388	3.16234	11.5586
2012-01-22 04:24:43	-57.8525	-54.1052	13.5705	101.285	0.785326	33.7393	3.15872	11.5646
2012-01-22 04:25:44	-57.8558	-54.1021	13.5714	101.311	0.80167	33.7405	3.16346	11.5706
2012-01-22 04:26:44	-57.8591	-54.0989	13.568	101.279	0.782955	33.7397	3.16128	11.5767
2012-01-22 04:27:45	-57.8623	-54.0958	13.5702	101.349	0.826899	33.7392	3.17378	11.5827
2012-01-22 04:28:45	-57.8656	-54.0927	13.5778	101.456	0.89271	33.7387	3.18593	11.5888
2012-01-22 04:29:46	-57.8689	-54.0896	13.5703	101.458	0.895197	33.7382	3.19984	11.5948
2012-01-22 04:30:46	-57.8722	-54.0865	13.5729	101.444	0.887472	33.7384	3.19043	11.6008
2012-01-22 04:31:46	-57.8755	-54.0834	13.571	101.381	0.849692	33.7386	3.1782	11.6066
2012-01-22 04:32:47	-57.8788	-54.0802	13.561	101.392	0.856499	33.7386	3.20014	11.6109
2012-01-22 04:33:47	-57.8821	-54.0771	13.563	101.398	0.860723	33.7385	3.19739	11.6151
2012-01-22 04:34:48	-57.8854	-54.0739	13.5647	101.414	0.871107	33.7391	3.19701	11.6194
2012-01-22 04:35:48	-57.8887	-54.0708	13.5595	101.363	0.840602	33.7407	3.19345	11.6237
2012-01-22 04:36:49	-57.892	-54.0676	13.5558	101.312	0.809918	33.7409	3.18704	11.6279
2012-01-22 04:37:49	-57.8953	-54.0645	13.564	101.312	0.810133	33.7417	3.17068	11.6322
2012-01-22 04:38:50	-57.8986	-54.0613	13.558	101.226	0.757722	33.7417	3.15916	11.6365
2012-01-22 04:39:50	-57.9019	-54.0581	13.5549	101.134	0.701492	33.7417	3.14138	11.6407
2012-01-22 04:40:50	-57.9052	-54.0549	13.5714	101.273	0.788028	33.7428	3.14399	11.645
2012-01-22 04:41:51	-57.9084	-54.0517	13.5654	101.274	0.789249	33.7436	3.1557	11.6493
2012-01-22 04:42:51	-57.9116	-54.0485	13.5688	101.335	0.827251	33.7432	3.16325	11.6536
2012-01-22 04:43:52	-57.9149	-54.0453	13.5827	101.477	0.91607	33.7422	3.17213	11.6578
2012-01-22 04:44:52	-57.9181	-54.0421	13.586	101.495	0.927879	33.7415	3.17041	11.6621
2012-01-22 04:45:53	-57.9214	-54.0388	13.585	101.529	0.949026	33.7422	3.17883	11.6664
2012-01-22 04:46:53	-57.9246	-54.0356	13.5775	101.52	0.944183	33.7409	3.19039	11.6707
2012-01-22 04:47:53	-57.9279	-54.0324	13.5808	101.553	0.965215	33.7418	3.19241	11.675
2012-01-22 04:48:54	-57.9311	-54.0293	13.5662	101.476	0.917865	33.741	3.20004	11.6792
2012-01-22 04:49:54	-57.9343	-54.0261	13.5687	101.499	0.933134	33.7411	3.20083	11.6835
2012-01-22 04:50:55	-57.9375	-54.0228	13.5599	101.315	0.81888	33.7414	3.16941	11.6878
2012-01-22 04:51:55	-57.9407	-54.0197	13.5664	101.232	0.768275	33.7426	3.13578	11.6921
2012-01-22 04:52:56	-57.9439	-54.0165	13.5647	101.216	0.75874	33.7436	3.13489	11.6964
2012-01-22 04:53:56	-57.9471	-54.0133	13.5719	101.062	0.663436	33.7452	3.08248	11.7007
2012-01-22 04:54:56	-57.9504	-54.0101	13.574	100.88	0.550357	33.7464	3.03258	11.705
2012-01-22 04:55:57	-57.9536	-54.0069	13.5894	100.737	0.461472	33.7472	2.96715	11.7092
2012-01-22 04:56:57	-57.9569	-54.0036	13.5945	100.311	0.194818	33.7524	2.84713	11.7135
2012-01-22 04:57:58	-57.9601	-54.0004	13.6207	100.074	0.0463424	33.7572	2.73755	11.7178
2012-01-22 04:58:58	-57.9633	-53.9971	13.6512	100.213	0.133575	33.766	2.71302	11.7221
2012-01-22 04:59:58	-57.9664	-53.9939	13.6962	100.57	0.357991	33.769	2.71742	11.7264
2012-01-22 05:00:59	-57.9696	-53.9906	13.7577	100.991	0.622934	33.7644	2.70925	11.7307
2012-01-22 05:01:59	-57.9729	-53.9874	13.7937	101.315	0.827222	33.7611	2.72412	11.735
2012-01-22 05:03:00	-57.9761	-53.9842	13.8031	101.542	0.970946	33.7613	2.76353	11.7393
2012-01-22 05:04:00	-57.9793	-53.9808	13.8086	101.769	1.11402	33.7615	2.81202	11.744
2012-01-22 05:05:01	-57.9825	-53.9777	NaN	NaN	NaN	33.7569	2.84443	11.7486
2012-01-22 05:06:01	-57.9856	-53.9745	NaN	NaN	NaN	33.7519	2.85975	11.7533
2012-01-22 05:07:01	-57.9887	-53.9714	13.7738	101.802	1.13675	33.7529	2.88297	11.7579
2012-01-22 05:08:02	-57.9919	-53.9682	13.7479	101.566	0.988985	33.7539	2.87151	11.7625
2012-01-22 05:09:02	-57.9951	-53.9651	13.7349	101.452	0.917582	33.7547	2.8671	11.7672
2012-01-22 05:10:03	-57.9983	-53.962	13.7261	101.358	0.858671	33.7569	2.85829	11.7717
2012-01-22 05:11:03	-58.0015	-53.9589	13.7172	101.292	0.817835	33.7571	2.85836	11.7763
2012-01-22 05:12:03	-58.0047	-53.9557	13.715	101.351	0.85527	33.758	2.87556	11.7809
2012-01-22 05:13:04	-58.0078	-53.9526	13.7166	101.544	0.978235	33.7539	2.92168	11.7855
2012-01-22 05:14:04	-58.011	-53.9495	13.714	101.621	1.02748	33.751	2.94517	11.7901
2012-01-22 05:15:05	-58.0142	-53.9463	13.7152	101.711	1.08542	33.748	2.96681	11.7947
2012-01-22 05:16:05	-58.0174	-53.9431	13.6895	101.537	0.975563	33.7464	2.97019	11.7993
2012-01-22 05:17:05	-58.0206	-53.94	13.6783	101.537	0.976144	33.7457	2.98958	11.8039
2012-01-22 05:18:06	-58.0238	-53.9367	13.6666	101.5	0.953395	33.745	3.00101	11.8087
2012-01-22 05:19:06	-58.027	-53.9335	13.6479	101.371	0.87184	33.7437	3.00316	11.8132
2012-01-22 05:20:07	-58.0301	-53.9303	13.6491	101.412	0.898595	33.7431	3.01134	11.8179
2012-01-22 05:21:07	-58.0333	-53.9272	13.6349	101.408	0.896333	33.7427	3.03535	11.8225
2012-01-22 05:22:08	-58.0364	-53.924	13.6311	101.444	0.920246	33.7409	3.0522	11.8272
2012-01-22 05:23:08	-58.0395	-53.9208	13.6281	101.501	0.956625	33.7403	3.0719	11.8319
2012-01-22 05:24:08	-58.0427	-53.9176	13.6168	101.425	0.908903	33.7402	3.07383	11.8365
2012-01-22 05:25:09	-58.0458	-53.9145	13.6077	101.383	0.883199	33.7398	3.07936	11.8412
2012-01-22 05:26:09	-58.0489	-53.9113	13.6058	101.436	0.917137	33.7404	3.09524	11.8458
2012-01-22 05:27:10	-58.0521	-53.9082	13.5946	101.366	0.873298	33.7398	3.09902	11.8504
2012-01-22 05:28:10	-58.0553	-53.9049	13.6001	101.381	0.883446	33.7404	3.0916	11.8551
2012-01-22 05:29:10	-58.0585	-53.9017	13.5987	101.411	0.902924	33.7403	3.10083	11.8597
2012-01-22 05:30:11	-58.0616	-53.8985	13.6034	101.473	0.943274	33.7397	3.10677	11.8644
2012-01-22 05:31:11	-58.0648	-53.8951	13.5997	101.42	0.910467	33.7396	3.1	11.8691
2012-01-22 05:32:12	-58.0681	-53.8918	13.5921	101.387	0.889437	33.74	3.10524	11.8737
2012-01-22 05:33:12	-58.0712	-53.8885	13.5914	101.474	0.945994	33.7388	3.12723	11.8784
2012-01-22 05:34:13	-58.0743	-53.8852	13.5906	101.499	0.962705	33.7385	3.13431	11.8832
2012-01-22 05:35:13	-58.0774	-53.882	13.5892	101.513	0.972481	33.7375	3.14009	11.8879
2012-01-22 05:36:13	-58.0805	-53.8789	13.585	101.466	0.942662	33.7375	3.13616	11.8925
2012-01-22 05:37:14	-58.0837	-53.8756	13.5806	101.399	0.900885	33.7382	3.12752	11.8972
2012-01-22 05:38:14	-58.0869	-53.8724	13.5767	101.291	0.831616	33.7401	3.10827	11.902
2012-01-22 05:39:15	-58.0901	-53.8691	13.577	101.207	0.77869	33.7407	3.08623	11.9069
2012-01-22 05:40:15	-58.0933	-53.8658	13.5785	101.161	0.749271	33.7422	3.06981	11.9119
2012-01-22 05:41:16	-58.0964	-53.8625	13.5781	101.078	0.696384	33.7446	3.04787	11.9168
2012-01-22 05:42:16	-58.0996	-53.8592	13.5971	101.101	0.711575	33.7477	3.01689	11.9217
2012-01-22 05:43:16	-58.1028	-53.8559	13.606	101.043	0.675123	33.7509	2.98266	11.9266
2012-01-22 05:44:17	-58.106	-53.8526	13.6172	101.067	0.691287	33.7547	2.96597	11.9315
2012-01-22 05:45:17	-58.1091	-53.8493	13.631	101.114	0.722308	33.7589	2.95148	11.9365
2012-01-22 05:46:18	-58.1121	-53.8461	13.6481	101.251	0.8113	33.761	2.95298	11.9414
2012-01-22 05:47:18	-58.1152	-53.8429	13.666	101.363	0.884822	33.7624	2.9473	11.9463
2012-01-22 05:48:18	-58.1183	-53.8396	13.6738	101.398	0.908123	33.7631	2.94052	11.9512
2012-01-22 05:49:19	-58.1214	-53.8362	13.679	101.409	0.916007	33.7637	2.93433	11.9559
2012-01-22 05:50:19	-58.1245	-53.833	13.6807	101.455	0.947048	33.7642	2.94222	11.9606
2012-01-22 05:51:20	-58.1276	-53.8297	13.6848	101.472	0.958528	33.7642	2.93745	11.9662
2012-01-22 05:52:20	-58.1307	-53.8263	13.6891	101.484	0.967423	33.7647	2.93156	11.9721
2012-01-22 05:53:21	-58.1338	-53.823	13.6898	101.541	1.00507	33.7651	2.94279	11.978
2012-01-22 05:54:21	-58.1369	-53.8198	13.6909	101.535	1.00214	33.7659	2.93826	11.9838
2012-01-22 05:55:21	-58.14	-53.8165	13.684	101.456	0.951493	33.767	2.93099	11.9897
2012-01-22 05:56:22	-58.1431	-53.8133	13.6875	101.483	0.97033	33.7674	2.93045	11.9955
2012-01-22 05:57:22	-58.1462	-53.8101	13.6897	101.478	0.968028	33.7676	2.92448	12.0013
2012-01-22 05:58:23	-58.1492	-53.8068	13.6848	101.444	0.946372	33.768	2.925	12.0072
2012-01-22 05:59:23	-58.1523	-53.8035	13.6871	101.495	0.980426	33.7687	2.93285	12.0131
2012-01-22 06:00:23	-58.1554	-53.8002	13.6872	101.557	1.02192	33.7686	2.947	12.0164
2012-01-22 06:01:24	-58.1585	-53.797	13.6818	101.529	1.00328	33.7684	2.94898	12.0158
2012-01-22 06:02:24	-58.1616	-53.7937	13.6849	101.493	0.979494	33.7686	2.93403	12.0152
2012-01-22 06:03:25	-58.1646	-53.7905	13.687	101.485	0.974311	33.7687	2.92695	12.0147
2012-01-22 06:04:25	-58.1677	-53.7873	13.6794	101.508	0.988707	33.7684	2.94512	12.0141
2012-01-22 06:05:26	-58.1707	-53.7841	13.6843	101.546	1.01409	33.7671	2.94532	12.0135
2012-01-22 06:06:26	-58.1738	-53.7809	13.6892	101.601	1.04982	33.7661	2.94842	12.013
2012-01-22 06:07:27	-58.1768	-53.7777	13.6863	101.657	1.08593	33.7662	2.9671	12.0124
2012-01-22 06:08:27	-58.1798	-53.7745	13.6766	101.656	1.08527	33.765	2.98541	12.0118
2012-01-22 06:09:27	-58.1828	-53.7713	13.6737	101.65	1.08154	33.7624	2.98812	12.0113
2012-01-22 06:10:28	-58.1858	-53.7682	13.6716	101.608	1.0539	33.7601	2.98068	12.0107
2012-01-22 06:11:28	-58.1888	-53.765	13.6544	101.432	0.938203	33.7574	2.96866	12.0101
2012-01-22 06:12:29	-58.1917	-53.7619	13.6544	101.407	0.921758	33.7561	2.96205	12.0095
2012-01-22 06:13:29	-58.1947	-53.7587	13.6468	101.353	0.886537	33.7561	2.9621	12.009
2012-01-22 06:14:29	-58.1977	-53.7556	13.6413	101.343	0.879903	33.7547	2.96915	12.0083
2012-01-22 06:15:30	-58.2007	-53.7525	13.6561	101.479	0.96842	33.7516	2.97412	12.0077
2012-01-22 06:16:30	-58.2036	-53.7494	13.6483	101.442	0.943942	33.7483	2.97854	12.0071
2012-01-22 06:17:31	-58.2065	-53.7463	13.6469	101.47	0.962324	33.7465	2.98757	12.0066
2012-01-22 06:18:31	-58.2095	-53.7432	13.6362	101.381	0.904168	33.7466	2.98433	12.006
2012-01-22 06:19:32	-58.2125	-53.7401	13.6341	101.357	0.888327	33.7476	2.98178	12.0054
2012-01-22 06:20:32	-58.2155	-53.7369	13.6265	101.291	0.844823	33.7486	2.97882	12.0048
2012-01-22 06:21:32	-58.2185	-53.7338	13.6295	101.3	0.850861	33.7487	2.97546	12.0042
2012-01-22 06:22:33	-58.2215	-53.7306	13.6336	101.225	0.801597	33.7497	2.94901	12.0036
2012-01-22 06:23:33	-58.2245	-53.7275	13.6357	101.09	0.713779	33.7514	2.91109	12.0031
2012-01-22 06:24:34	-58.2275	-53.7243	13.642	101.09	0.713483	33.7537	2.89881	12.0025
2012-01-22 06:25:34	-58.2305	-53.7212	13.6497	101.157	0.75695	33.7559	2.90061	12.0019
2012-01-22 06:26:35	-58.2335	-53.718	13.664	101.259	0.824147	33.7566	2.90069	12.0013
2012-01-22 06:27:35	-58.2365	-53.7149	13.6787	101.381	0.903403	33.7561	2.90395	12.0007
2012-01-22 06:28:35	-58.2395	-53.7117	13.6884	101.481	0.968723	33.7553	2.91016	12.0002
2012-01-22 06:29:36	-58.2425	-53.7085	13.6936	101.515	0.99141	33.7548	2.90897	11.9996
2012-01-22 06:30:36	-58.2455	-53.7054	13.6909	101.498	0.980193	33.7549	2.90922	11.999
2012-01-22 06:31:37	-58.2485	-53.7022	13.6909	101.483	0.969787	33.7555	2.90462	11.9984
2012-01-22 06:32:37	-58.2514	-53.6991	13.6865	101.468	0.959868	33.7552	2.90817	11.9978
2012-01-22 06:33:38	-58.2543	-53.696	13.6946	101.547	1.01149	33.7545	2.91303	11.9972
2012-01-22 06:34:38	-58.2573	-53.6929	13.6907	101.508	0.986037	33.7549	2.91065	11.9966
2012-01-22 06:35:39	-58.2603	-53.6898	13.6832	101.468	0.959604	33.7544	2.9146	11.996
2012-01-22 06:36:39	-58.2633	-53.6867	13.6828	101.489	0.973434	33.7532	2.9208	11.9954
2012-01-22 06:37:40	-58.2663	-53.6836	13.677	101.436	0.93876	33.7535	2.91749	11.9948
2012-01-22 06:38:40	-58.2693	-53.6804	13.68	101.458	0.952963	33.7541	2.91613	11.9942
2012-01-22 06:39:41	-58.2722	-53.6773	13.6807	101.55	1.01279	33.7557	2.93719	11.9937
2012-01-22 06:40:41	-58.2751	-53.6741	13.682	101.615	1.05491	33.7559	2.9507	11.9931
2012-01-22 06:41:41	-58.2781	-53.671	13.6794	101.656	1.08184	33.7563	2.96532	11.9926
2012-01-22 06:42:42	-58.281	-53.6679	13.6721	101.649	1.07668	33.7563	2.97672	11.992
2012-01-22 06:43:42	-58.2839	-53.6647	13.6657	101.597	1.04265	33.7539	2.97679	11.9915
2012-01-22 06:44:43	-58.2867	-53.6616	13.6538	101.513	0.987544	33.7521	2.97703	11.9909
2012-01-22 06:45:43	-58.2896	-53.6585	13.6482	101.492	0.974265	33.7496	2.98235	11.9904
2012-01-22 06:46:44	-58.2925	-53.6554	13.6435	101.474	0.961921	33.7476	2.98539	11.9898
2012-01-22 06:47:44	-58.2953	-53.6522	13.6376	101.46	0.952864	33.7461	2.99264	11.9893
2012-01-22 06:48:45	-58.2982	-53.6492	13.6341	101.448	0.945181	33.7431	2.99563	11.9887
2012-01-22 06:49:45	-58.3011	-53.6461	13.6312	101.468	0.957672	33.7393	3.00531	11.9882
2012-01-22 06:50:45	-58.3039	-53.643	13.6251	101.493	0.974108	33.7367	3.02364	11.9876
2012-01-22 06:51:46	-58.3068	-53.6399	13.6255	101.574	1.02649	33.7355	3.04313	11.987
2012-01-22 06:52:46	-58.3097	-53.6368	13.6072	101.485	0.968419	33.735	3.05464	11.9864
2012-01-22 06:53:47	-58.3126	-53.6337	13.6069	101.507	0.98221	33.7341	3.05863	11.9859
2012-01-22 06:54:47	-58.3155	-53.6306	13.6042	101.604	1.04512	33.7326	3.0889	11.9853
2012-01-22 06:55:48	-58.3184	-53.6275	13.5997	101.586	1.03376	33.7319	3.092	11.9847
2012-01-22 06:56:48	-58.3214	-53.6244	13.5944	101.612	1.04998	33.7313	3.10698	11.9841
2012-01-22 06:57:48	-58.3243	-53.6213	13.5853	101.592	1.03707	33.731	3.11966	11.9834
2012-01-22 06:58:49	-58.3272	-53.6182	13.5679	101.471	0.957914	33.731	3.12167	11.9827
2012-01-22 06:59:49	-58.33	-53.6151	13.5622	101.443	0.939781	33.7307	3.12581	11.982
2012-01-22 07:00:50	-58.3329	-53.6121	13.5557	101.452	0.945386	33.7308	3.1399	11.9813
2012-01-22 07:01:50	-58.3358	-53.609	13.5509	101.455	0.947396	33.7303	3.14882	11.9806
2012-01-22 07:02:51	-58.3387	-53.6059	13.5396	101.344	0.874639	33.7307	3.1415	11.9799
2012-01-22 07:03:51	-58.3416	-53.6028	13.5378	101.393	0.906689	33.7309	3.15643	11.9792
2012-01-22 07:04:51	-58.3446	-53.5996	13.5319	101.341	0.872765	33.7311	3.15341	11.9785
2012-01-22 07:05:52	-58.3476	-53.5965	13.5264	101.4	0.910835	33.7316	3.17718	11.9778
2012-01-22 07:06:52	-58.3505	-53.5933	13.5343	101.493	0.970896	33.7305	3.18522	11.9771
2012-01-22 07:07:53	-58.3534	-53.5902	13.5234	101.37	0.890943	33.7305	3.17405	11.9763
2012-01-22 07:08:53	-58.3564	-53.5871	13.5207	101.297	0.843581	33.7314	3.15989	11.9756
2012-01-22 07:09:53	-58.3593	-53.5839	13.5198	101.268	0.824174	33.7311	3.15161	11.975
2012-01-22 07:10:54	-58.3623	-53.5808	13.5187	101.198	0.778911	33.7323	3.13654	11.9742
2012-01-22 07:11:54	-58.3652	-53.5777	13.5231	101.167	0.758802	33.7331	3.11908	11.9735
2012-01-22 07:12:54	-58.3681	-53.5746	13.5291	101.095	0.712087	33.7351	3.08849	11.9728
2012-01-22 07:13:55	-58.371	-53.5716	13.5387	101.284	0.834371	33.7387	3.11815	11.9721
2012-01-22 07:14:55	-58.3739	-53.5685	13.5522	101.481	0.962376	33.7386	3.14254	11.9713
2012-01-22 07:15:56	-58.3769	-53.5654	13.5753	101.693	1.10004	33.7326	3.15275	11.9722
2012-01-22 07:16:56	-58.3799	-53.5623	13.5866	101.764	1.14676	33.7312	3.15098	11.974
2012-01-22 07:17:56	-58.3828	-53.5591	13.5759	101.726	1.12225	33.7313	3.16032	11.9757
2012-01-22 07:18:57	-58.3858	-53.556	13.5557	101.611	1.04793	33.7308	3.16958	11.9775
2012-01-22 07:19:57	-58.3887	-53.5529	13.552	101.496	0.973004	33.732	3.14596	11.9792
2012-01-22 07:20:58	-58.3917	-53.5497	13.5507	101.27	0.826912	33.7318	3.09096	11.981
2012-01-22 07:21:58	-58.3946	-53.5466	13.5437	101.16	0.755136	33.7343	3.07618	11.9828
2012-01-22 07:22:58	-58.3975	-53.5435	13.5472	101.176	0.765867	33.7391	3.07093	11.9845
2012-01-22 07:23:59	-58.4005	-53.5405	13.5505	101.245	0.810966	33.7417	3.08234	11.9862
2012-01-22 07:24:59	-58.4034	-53.5373	13.5702	101.29	0.84043	33.7408	3.05601	11.988
2012-01-22 07:26:00	-58.4064	-53.5341	13.5814	101.273	0.829852	33.7418	3.03166	11.9898
2012-01-22 07:27:00	-58.4093	-53.5309	13.5976	101.259	0.821197	33.742	2.99477	11.9915
2012-01-22 07:28:00	-58.4122	-53.5278	13.5964	101.113	0.726172	33.7424	2.96009	11.9933
2012-01-22 07:29:01	-58.4151	-53.5247	13.6053	100.957	0.625147	33.7442	2.90388	11.995
2012-01-22 07:30:01	-58.418	-53.5215	13.6204	100.706	0.46139	33.7462	2.80982	11.9968
2012-01-22 07:31:02	-58.4209	-53.5182	13.6413	100.48	0.313768	33.7504	2.71333	11.9987
2012-01-22 07:32:02	-58.4238	-53.5151	13.6702	100.326	0.213186	33.7558	2.61893	12.0004
2012-01-22 07:33:02	-58.4267	-53.5119	13.6999	100.445	0.291542	33.7624	2.59198	12.0021
2012-01-22 07:34:03	-58.4296	-53.5088	13.7389	100.553	0.362576	33.7659	2.54636	12.0039
2012-01-22 07:35:03	-58.4326	-53.5057	13.7962	100.775	0.508215	33.7657	2.49572	12.0056
2012-01-22 07:36:04	-58.4355	-53.5025	13.8442	100.972	0.637716	33.7693	2.45595	12.0074
2012-01-22 07:37:04	-58.4385	-53.4994	13.8532	101.047	0.686623	33.77	2.4575	12.0092
2012-01-22 07:38:04	-58.4414	-53.4962	13.8896	101.317	0.864303	33.7696	2.45784	12.011
2012-01-22 07:39:05	-58.4443	-53.4931	13.8966	101.389	0.911645	33.7689	2.46351	12.0125
2012-01-22 07:40:05	-58.4472	-53.49	13.9044	101.535	1.00766	33.7679	2.48488	12.0135
2012-01-22 07:41:06	-58.4502	-53.4869	13.9078	101.654	1.08577	33.7671	2.5075	12.0144
2012-01-22 07:42:06	-58.4531	-53.4837	13.9016	101.609	1.05622	33.7673	2.50696	12.0154
2012-01-22 07:43:06	-58.456	-53.4806	13.8909	101.519	0.997354	33.7667	2.50327	12.0163
2012-01-22 07:44:07	-58.4589	-53.4774	13.8797	101.465	0.961863	33.7657	2.50917	12.0173
2012-01-22 07:45:07	-58.4617	-53.4743	13.8696	101.387	0.910574	33.7659	2.50895	12.0182
2012-01-22 07:46:08	-58.4646	-53.4711	13.8656	101.357	0.891147	33.7664	2.50772	12.0193
2012-01-22 07:47:08	-58.4674	-53.468	13.8584	101.317	0.864752	33.7652	2.50964	12.0202
2012-01-22 07:48:08	-58.4703	-53.4649	13.8569	101.331	0.874237	33.7645	2.51532	12.0211
2012-01-22 07:49:09	-58.4732	-53.4618	13.8539	101.367	0.897838	33.7654	2.52963	12.0221
2012-01-22 07:50:09	-58.476	-53.4586	13.8494	101.303	0.856468	33.7644	2.5227	12.023
2012-01-22 07:51:09	-58.4789	-53.4554	13.844	101.357	0.891923	33.764	2.54459	12.024
2012-01-22 07:52:10	-58.4818	-53.4523	13.8359	101.278	0.84004	33.7638	2.53976	12.025
2012-01-22 07:53:10	-58.4846	-53.4491	13.8214	101.209	0.794346	33.7633	2.54726	12.026
2012-01-22 07:54:11	-58.4874	-53.446	13.8197	101.211	0.795917	33.7627	2.55077	12.0269
2012-01-22 07:55:11	-58.4903	-53.4428	13.8096	101.131	0.743562	33.7617	2.54922	12.0279
2012-01-22 07:56:11	-58.4932	-53.4396	13.8011	100.977	0.642696	33.7614	2.52487	12.0289
2012-01-22 07:57:12	-58.4962	-53.4365	13.7988	100.921	0.605803	33.7617	2.51508	12.0299
2012-01-22 07:58:12	-58.4991	-53.4333	13.8004	100.981	0.645365	33.7619	2.52606	12.0308
2012-01-22 07:59:12	-58.502	-53.4301	13.7983	100.863	0.567642	33.7618	2.49995	12.0318
2012-01-22 08:00:13	-58.5049	-53.4268	13.7963	100.751	0.4943	33.7612	2.47573	12.0329
2012-01-22 08:01:13	-58.5079	-53.4235	13.8031	100.733	0.482689	33.7618	2.45748	12.0339
2012-01-22 08:02:14	-58.5108	-53.4203	13.8113	100.839	0.552309	33.7624	2.46859	12.0349
2012-01-22 08:03:14	-58.5137	-53.417	13.8149	100.91	0.599023	33.7631	2.47892	12.036
2012-01-22 08:04:15	-58.5166	-53.4138	13.8158	100.913	0.601246	33.7626	2.47852	12.037
2012-01-22 08:05:15	-58.5195	-53.4105	13.8264	100.924	0.608873	33.7628	2.46158	12.038
2012-01-22 08:06:15	-58.5225	-53.4072	13.8248	100.897	0.590689	33.7622	2.45705	12.0391
2012-01-22 08:07:16	-58.5254	-53.4039	13.8175	100.888	0.58483	33.7621	2.46728	12.0401
2012-01-22 08:08:16	-58.5284	-53.4007	13.8216	100.941	0.62014	33.762	2.47263	12.0411
2012-01-22 08:09:17	-58.5313	-53.3975	13.8232	100.939	0.618944	33.7617	2.46892	12.0422
2012-01-22 08:10:17	-58.5342	-53.3942	13.8228	100.905	0.596751	33.7612	2.46098	12.0432
2012-01-22 08:11:18	-58.5371	-53.3909	13.8238	100.898	0.592207	33.7616	2.45634	12.0442
2012-01-22 08:12:18	-58.5401	-53.3877	13.8198	100.901	0.59385	33.7624	2.4641	12.0452
2012-01-22 08:13:18	-58.543	-53.3844	13.8181	100.902	0.594869	33.7632	2.46715	12.0463
2012-01-22 08:14:19	-58.5459	-53.3812	13.8214	100.9	0.593561	33.7638	2.46006	12.0473
2012-01-22 08:15:19	-58.5488	-53.378	13.8288	100.854	0.563218	33.7648	2.43394	12.0483
2012-01-22 08:16:20	-58.5517	-53.3748	13.8297	100.802	0.52936	33.767	2.41882	12.0492
2012-01-22 08:17:20	-58.5546	-53.3717	13.8249	100.739	0.487682	33.7694	2.41115	12.0497
2012-01-22 08:18:21	-58.5575	-53.3684	13.8317	100.802	0.529221	33.7734	2.41333	12.0502
2012-01-22 08:19:21	-58.5604	-53.3652	13.8415	100.866	0.571418	33.7761	2.41123	12.0507
2012-01-22 08:20:22	-58.5633	-53.362	13.85	100.922	0.608526	33.7783	2.40904	12.0513
2012-01-22 08:21:22	-58.5662	-53.3587	13.8605	101.003	0.661799	33.7806	2.40884	12.0518
2012-01-22 08:22:23	-58.5692	-53.3554	13.8657	101.034	0.682508	33.7821	2.40674	12.0523
2012-01-22 08:23:23	-58.5721	-53.3522	13.8584	100.986	0.651078	33.783	2.40821	12.0529
2012-01-22 08:24:23	-58.5751	-53.349	13.8606	100.945	0.624232	33.7844	2.39318	12.0534
2012-01-22 08:25:24	-58.578	-53.3458	13.859	100.809	0.534137	33.7861	2.36109	12.0539
2012-01-22 08:26:24	-58.5809	-53.3426	13.8627	100.736	0.485902	33.787	2.33489	12.0544
2012-01-22 08:27:25	-58.5838	-53.3394	13.8693	100.725	0.478956	33.7893	2.31982	12.0549
2012-01-22 08:28:25	-58.5867	-53.3363	13.8739	100.666	0.439803	33.7906	2.29583	12.0554
2012-01-22 08:29:26	-58.5895	-53.3332	13.8952	100.765	0.505913	33.79	2.28141	12.0558
2012-01-22 08:30:26	-58.5923	-53.33	13.9258	101	0.661073	33.79	2.28443	12.0563
2012-01-22 08:31:27	-58.5952	-53.3268	13.9259	101.069	0.706514	33.7891	2.30125	12.0568
2012-01-22 08:32:27	-58.598	-53.3237	13.939	101.186	0.783572	33.7886	2.30624	12.0573
2012-01-22 08:33:27	-58.6009	-53.3205	13.9475	101.201	0.794036	33.7891	2.29467	12.0578
2012-01-22 08:34:28	-58.6038	-53.3173	13.9525	101.219	0.805827	33.79	2.28941	12.0584
2012-01-22 08:35:28	-58.6067	-53.3141	13.9564	101.215	0.80332	33.7918	2.28062	12.0589
2012-01-22 08:36:29	-58.6096	-53.3108	13.9582	101.22	0.806414	33.7929	2.27785	12.0594
2012-01-22 08:37:29	-58.6125	-53.3076	13.9597	101.218	0.805418	33.7932	2.27427	12.0599
2012-01-22 08:38:29	-58.6153	-53.3044	13.9776	101.302	0.860796	33.7936	2.26253	12.0604
2012-01-22 08:39:30	-58.6181	-53.3012	13.9749	101.246	0.824393	33.7948	2.2533	12.0609
2012-01-22 08:40:30	-58.621	-53.2981	13.9758	101.119	0.740083	33.7953	2.21972	12.0614
2012-01-22 08:41:31	-58.6238	-53.2949	13.979	100.899	0.595449	33.7958	2.15928	12.0619
2012-01-22 08:42:31	-58.6267	-53.2916	13.9918	100.793	0.525132	33.799	2.10855	12.0635
2012-01-22 08:43:31	-58.6296	-53.2884	NaN	NaN	NaN	33.8043	2.07276	12.0659
2012-01-22 08:44:32	-58.6325	-53.2852	NaN	NaN	NaN	33.8095	2.02645	12.0683
2012-01-22 08:45:32	-58.6353	-53.282	14.0584	100.757	0.502469	33.8205	1.97551	12.0707
2012-01-22 08:46:33	-58.6382	-53.2789	14.1011	100.99	0.65713	33.8341	1.95537	12.073
2012-01-22 08:47:33	-58.641	-53.2758	14.1156	101.077	0.715002	33.84	1.95033	12.0753
2012-01-22 08:48:34	-58.6439	-53.2726	14.1586	101.366	0.907754	33.8418	1.94572	12.0776
2012-01-22 08:49:34	-58.6467	-53.2695	NaN	NaN	NaN	33.8431	1.93783	12.08
2012-01-22 08:50:34	-58.6495	-53.2663	NaN	NaN	NaN	33.844	1.91169	12.0823
2012-01-22 08:51:35	-58.6524	-53.2631	14.2275	101.659	1.10349	33.8454	1.89422	12.0847
2012-01-22 08:52:35	-58.6553	-53.2599	14.2341	101.699	1.1309	33.8471	1.89201	12.087
2012-01-22 08:53:36	-58.6581	-53.2568	14.2356	101.698	1.13037	33.8476	1.88817	12.0894
2012-01-22 08:54:36	-58.661	-53.2536	14.2431	101.73	1.15194	33.8471	1.88229	12.0918
2012-01-22 08:55:36	-58.6639	-53.2505	14.249	101.79	1.19228	33.8467	1.88614	12.0941
2012-01-22 08:56:37	-58.6668	-53.2473	14.2439	101.759	1.17211	33.8467	1.88689	12.0965
2012-01-22 08:57:37	-58.6696	-53.2441	14.2418	101.756	1.17065	33.8469	1.8892	12.0988
2012-01-22 08:58:38	-58.6725	-53.241	14.2519	101.852	1.23537	33.8465	1.89485	12.1012
2012-01-22 08:59:38	-58.6753	-53.2378	14.2514	101.841	1.22844	33.8454	1.89291	12.1035
2012-01-22 09:00:39	-58.6782	-53.2346	14.2467	101.844	1.23068	33.8439	1.90222	12.1059
2012-01-22 09:01:39	-58.681	-53.2315	14.2499	101.854	1.23805	33.8431	1.89957	12.1082
2012-01-22 09:02:39	-58.6837	-53.2284	14.2446	101.814	1.21147	33.8442	1.89832	12.1104
2012-01-22 09:03:40	-58.6864	-53.2253	14.2463	101.78	1.1892	33.8443	1.88602	12.1127
2012-01-22 09:04:40	-58.6892	-53.2221	14.2352	101.679	1.12199	33.8446	1.87973	12.115
2012-01-22 09:05:41	-58.6921	-53.2189	14.2405	101.725	1.1532	33.8453	1.88114	12.1173
2012-01-22 09:06:41	-58.6948	-53.2158	14.2406	101.735	1.16059	33.8449	1.88282	12.1196
2012-01-22 09:07:41	-58.6977	-53.2126	14.2517	101.792	1.19877	33.8442	1.87692	12.1219
2012-01-22 09:08:42	-58.7005	-53.2093	14.2488	101.751	1.17214	33.8449	1.87181	12.1243
2012-01-22 09:09:42	-58.7033	-53.2061	14.2367	101.661	1.11182	33.8462	1.86964	12.1266
2012-01-22 09:10:43	-58.706	-53.203	14.2414	101.71	1.14523	33.8469	1.87277	12.1289
2012-01-22 09:11:43	-58.7088	-53.1998	14.2498	101.731	1.16014	33.8458	1.86385	12.1312
2012-01-22 09:12:44	-58.7116	-53.1966	14.2543	101.711	1.14673	33.8449	1.85203	12.1335
2012-01-22 09:13:44	-58.7145	-53.1934	14.2484	101.596	1.07041	33.845	1.83431	12.1359
2012-01-22 09:14:45	-58.7175	-53.1902	14.2588	101.641	1.10127	33.8452	1.82604	12.1383
2012-01-22 09:15:45	-58.7204	-53.1869	14.2659	101.623	1.0894	33.8455	1.80859	12.1408
2012-01-22 09:16:45	-58.7233	-53.1835	14.2696	101.604	1.07689	33.8454	1.79697	12.1432
2012-01-22 09:17:46	-58.7262	-53.1802	14.2832	101.636	1.09938	33.8459	1.78087	12.1457
2012-01-22 09:18:46	-58.7291	-53.177	14.2879	101.668	1.12142	33.8468	1.77991	12.1481
2012-01-22 09:19:47	-58.7319	-53.1737	14.3039	101.71	1.14996	33.849	1.7612	12.1504
2012-01-22 09:20:47	-58.7347	-53.1704	14.3087	101.592	1.07151	33.853	1.72279	12.1528
2012-01-22 09:21:48	-58.7376	-53.1671	14.3291	101.655	1.1141	33.8572	1.70149	12.1553
2012-01-22 09:22:48	-58.7405	-53.1638	14.3296	101.623	1.09328	33.8611	1.6916	12.1577
2012-01-22 09:23:48	-58.7433	-53.1606	14.3381	101.627	1.09646	33.8674	1.67642	12.1601
2012-01-22 09:24:49	-58.7462	-53.1573	14.3614	101.85	1.24663	33.8727	1.68909	12.1625
2012-01-22 09:25:49	-58.7491	-53.1541	NaN	NaN	NaN	33.8788	1.69872	12.1648
2012-01-22 09:26:50	-58.7519	-53.1508	NaN	NaN	NaN	33.8848	1.71115	12.1672
2012-01-22 09:27:50	-58.7548	-53.1476	14.386	102.186	1.47401	33.8868	1.72528	12.1696
2012-01-22 09:28:51	-58.7577	-53.1444	14.3817	102.159	1.45636	33.8879	1.72537	12.172
2012-01-22 09:29:51	-58.7606	-53.1413	14.375	102.084	1.40661	33.8903	1.71785	12.1743
2012-01-22 09:30:51	-58.7634	-53.1379	14.3662	102.038	1.37549	33.8895	1.721	12.1767
2012-01-22 09:31:52	-58.7663	-53.1346	14.3708	102.149	1.45089	33.8909	1.73912	12.1791
2012-01-22 09:32:52	-58.7691	-53.1313	14.3643	102.309	1.55894	33.8926	1.78926	12.1816
2012-01-22 09:33:53	-58.772	-53.128	14.3662	102.523	1.70366	33.8956	1.83858	12.184
2012-01-22 09:34:53	-58.7749	-53.1248	14.3654	102.671	1.80366	33.9032	1.8746	12.186
2012-01-22 09:35:53	-58.7777	-53.1215	14.356	102.659	1.79538	33.9139	1.88731	12.1865
2012-01-22 09:36:54	-58.7806	-53.1183	14.3368	102.546	1.71894	33.9213	1.88984	12.187
2012-01-22 09:37:54	-58.7834	-53.115	14.3095	102.436	1.64438	33.9244	1.91049	12.1875
2012-01-22 09:38:55	-58.7862	-53.1118	14.2888	102.435	1.64334	33.9249	1.94691	12.1879
2012-01-22 09:39:55	-58.7891	-53.1086	14.2848	102.427	1.63803	33.9249	1.95077	12.1884
2012-01-22 09:40:55	-58.7919	-53.1055	14.2674	102.362	1.59407	33.9253	1.96558	12.1888
2012-01-22 09:41:56	-58.7947	-53.1021	14.2602	102.303	1.55477	33.9254	1.96276	12.1893
2012-01-22 09:42:56	-58.7976	-53.099	14.2525	102.216	1.49582	33.9261	1.95541	12.1898
2012-01-22 09:43:57	-58.8005	-53.0958	14.2395	102.064	1.39349	33.926	1.93993	12.1902
2012-01-22 09:44:57	-58.8034	-53.0925	14.2366	102.046	1.38151	33.9276	1.94076	12.1907
2012-01-22 09:45:57	-58.8063	-53.0893	14.2427	102.074	1.40038	33.929	1.9352	12.1912
2012-01-22 09:46:58	-58.8091	-53.0861	14.2294	102.132	1.43944	33.9296	1.97229	12.1916
2012-01-22 09:47:58	-58.812	-53.0829	14.2239	102.093	1.41329	33.9272	1.9717	12.1921
2012-01-22 09:48:59	-58.8148	-53.0797	14.2338	102.151	1.45242	33.9272	1.96755	12.1926
2012-01-22 09:49:59	-58.8177	-53.0765	14.2314	102.121	1.43247	33.9259	1.96584	12.193
2012-01-22 09:51:00	-58.8205	-53.0734	14.2253	102.07	1.39792	33.9256	1.96417	12.1935
2012-01-22 09:52:00	-58.8233	-53.0702	14.2195	102.037	1.37558	33.9264	1.96474	12.1939
2012-01-22 09:53:00	-58.8261	-53.067	14.2302	101.995	1.3478	33.9235	1.93494	12.1944
2012-01-22 09:54:01	-58.8289	-53.0639	14.2341	101.997	1.3491	33.9243	1.92954	12.1948
2012-01-22 09:55:01	-58.8317	-53.0609	14.2476	101.857	1.25518	33.9219	1.87131	12.1952
2012-01-22 09:56:02	-58.8345	-53.0577	14.2509	101.834	1.24019	33.9213	1.85962	12.1957
2012-01-22 09:57:02	-58.8373	-53.0544	14.2517	101.895	1.28076	33.9217	1.8722	12.1961
2012-01-22 09:58:02	-58.8402	-53.0512	14.273	102.019	1.36491	33.9197	1.86527	12.1966
2012-01-22 09:59:03	-58.8431	-53.0479	14.2841	102.123	1.4352	33.9202	1.87101	12.1971
2012-01-22 10:00:03	-58.8459	-53.0447	14.306	102.283	1.54375	33.9203	1.87397	12.1975
2012-01-22 10:01:03	-58.8487	-53.0415	14.3071	102.281	1.54217	33.9189	1.86986	12.198
2012-01-22 10:02:04	-58.8515	-53.0383	14.312	102.252	1.52334	33.9209	1.85327	12.1984
2012-01-22 10:03:04	-58.8543	-53.0351	14.314	102.136	1.44482	33.9216	1.81942	12.1989
2012-01-22 10:04:05	-58.8571	-53.0319	14.318	102.127	1.4392	33.9218	1.81166	12.1993
2012-01-22 10:05:05	-58.8599	-53.0287	14.3287	102.165	1.46527	33.9228	1.80273	12.1998
2012-01-22 10:06:05	-58.8627	-53.0254	14.3364	102.235	1.51282	33.9221	1.80693	12.2002
2012-01-22 10:07:06	-58.8656	-53.0221	14.3523	102.433	1.6467	33.9211	1.8275	12.2007
2012-01-22 10:08:06	-58.8684	-53.0188	14.3551	102.543	1.7206	33.9205	1.84834	12.2012
2012-01-22 10:09:07	-58.8713	-53.0155	14.3578	102.54	1.71869	33.9234	1.84303	12.2016
2012-01-22 10:10:07	-58.874	-53.0123	14.3564	102.572	1.7402	33.9258	1.85136	12.2021
2012-01-22 10:11:07	-58.8769	-53.0091	14.3547	102.507	1.69707	33.928	1.83904	12.2049
2012-01-22 10:12:08	-58.8797	-53.0058	14.354	102.554	1.73021	33.9308	1.85056	12.2089
2012-01-22 10:13:08	-58.8826	-53.0026	14.3504	102.576	1.74563	33.9335	1.86111	12.213
2012-01-22 10:14:09	-58.8855	-52.9993	14.3483	102.632	1.78473	33.9361	1.87798	12.2171
2012-01-22 10:15:09	-58.8884	-52.9961	14.3552	102.837	1.92439	33.9408	1.91525	12.2212
2012-01-22 10:16:09	-58.8913	-52.9928	14.3525	102.992	2.02976	33.9466	1.95611	12.2253
2012-01-22 10:17:10	-58.8942	-52.9896	14.342	103.034	2.05917	33.9542	1.9831	12.2294
2012-01-22 10:18:10	-58.897	-52.9865	14.338	103.107	2.10954	33.9629	2.00613	12.2334
2012-01-22 10:19:11	-58.8998	-52.9834	14.3223	103.001	2.03882	33.974	2.00594	12.2374
2012-01-22 10:20:11	-58.9027	-52.9802	14.3084	102.883	1.95986	33.9844	1.99949	12.2415
2012-01-22 10:21:12	-58.9056	-52.9772	14.3071	102.886	1.96314	33.9948	2.00083	12.2455
2012-01-22 10:22:12	-58.9084	-52.9741	14.301	102.832	1.92706	34.0043	1.99647	12.2495
2012-01-22 10:23:12	-58.9112	-52.971	14.3105	102.77	1.88662	34.0098	1.96321	12.2535
2012-01-22 10:24:13	-58.914	-52.968	14.3276	102.612	1.78087	34.0144	1.8941	12.2575
2012-01-22 10:25:13	-58.9168	-52.965	14.347	102.625	1.79134	34.0173	1.8625	12.2614
2012-01-22 10:26:14	-58.9197	-52.962	14.3591	102.667	1.82119	34.0142	1.8512	12.2654
2012-01-22 10:27:14	-58.9224	-52.9589	14.3783	102.767	1.89035	34.0099	1.84167	12.2693
2012-01-22 10:28:15	-58.9253	-52.956	NaN	NaN	NaN	34.0081	1.85066	12.2733
2012-01-22 10:29:15	-58.9281	-52.953	NaN	NaN	NaN	34.0102	1.89079	12.2773
2012-01-22 10:30:15	-58.9309	-52.95	14.4379	103.574	2.44481	34.0146	1.93509	12.2813
2012-01-22 10:31:16	-58.9338	-52.947	14.4538	103.753	2.56891	34.0196	1.9501	12.2853
2012-01-22 10:32:16	-58.9366	-52.9439	14.4664	103.812	2.61061	34.0231	1.94102	12.2893
2012-01-22 10:33:16	-58.9395	-52.9409	14.4474	103.645	2.49768	34.0253	1.93256	12.2934
2012-01-22 10:34:17	-58.9423	-52.9378	14.4324	103.575	2.45122	34.0242	1.94189	12.2974
2012-01-22 10:35:17	-58.9451	-52.9348	14.4375	103.591	2.46379	34.0236	1.93735	12.3013
2012-01-22 10:36:18	-58.9479	-52.9318	14.4394	103.62	2.48518	34.024	1.94028	12.3052
2012-01-22 10:37:18	-58.9506	-52.929	14.4363	103.647	2.50466	34.0257	1.95147	12.309
2012-01-22 10:38:18	-58.9534	-52.9262	14.4477	103.673	2.52414	34.0288	1.93712	12.3129
2012-01-22 10:39:19	-58.9561	-52.9233	14.4727	103.695	2.54159	34.0311	1.89963	12.3167
2012-01-22 10:40:19	-58.9589	-52.9205	14.4968	103.804	2.61816	34.0316	1.88399	12.3206
2012-01-22 10:41:19	-58.9617	-52.9176	14.5303	104.135	2.84729	34.0318	1.90581	12.3245
2012-01-22 10:42:20	-58.9645	-52.9147	14.5796	104.558	3.14048	34.0312	1.92231	12.3285
2012-01-22 10:43:20	-58.9673	-52.9117	14.6137	104.831	3.33067	34.0308	1.92927	12.3325
2012-01-22 10:44:20	-58.9702	-52.9087	14.6236	104.899	3.37911	34.0316	1.92766	12.3366
2012-01-22 10:45:21	-58.9731	-52.9058	14.63	105.035	3.4746	34.0302	1.94885	12.3407
2012-01-22 10:46:21	-58.976	-52.9028	14.6214	105.002	3.45369	34.0242	1.95614	12.3448
2012-01-22 10:47:22	-58.9789	-52.8998	14.6203	104.952	3.42193	34.017	1.94745	12.3488
2012-01-22 10:48:22	-58.9817	-52.8969	14.617	104.873	3.36992	34.0134	1.9351	12.3529
2012-01-22 10:49:22	-58.9846	-52.894	14.6123	104.866	3.36668	34.0119	1.94179	12.3569
2012-01-22 10:50:23	-58.9874	-52.8911	14.6018	104.753	3.29084	34.011	1.93301	12.3608
2012-01-22 10:51:23	-58.9902	-52.8883	14.6017	104.667	3.23345	34.0102	1.9111	12.3647
2012-01-22 10:52:23	-58.9931	-52.886	14.6072	104.633	3.21291	34.0089	1.8942	12.3688
2012-01-22 10:53:24	-58.996	-52.8835	14.6081	104.541	3.15156	34.0074	1.87156	12.3729
2012-01-22 10:54:24	-58.999	-52.8811	14.5969	104.355	3.02508	34.0072	1.84607	12.3771
2012-01-22 10:55:24	-59.002	-52.8786	14.6124	104.418	3.07066	34.0078	1.83326	12.3814
2012-01-22 10:56:25	-59.005	-52.8761	14.6259	104.526	3.14793	34.0089	1.83596	12.3856
2012-01-22 10:57:25	-59.008	-52.8737	14.6402	104.58	3.18816	34.0098	1.82503	12.3902
2012-01-22 10:58:25	-59.0109	-52.8713	14.5927	104.16	2.89827	34.0119	1.80517	12.395
2012-01-22 12:14:54	-59.2345	-52.6938	14.3438	102.824	2.00236	33.9981	1.89612	12.5203
2012-01-22 12:15:55	-59.2374	-52.6915	14.3502	102.788	1.97457	33.9968	1.87586	12.5125
2012-01-22 12:16:55	-59.2403	-52.6892	14.3504	102.816	1.99242	33.9943	1.88192	12.5047
2012-01-22 12:17:56	-59.2432	-52.6868	14.358	102.874	2.0312	33.9941	1.88485	12.4969
2012-01-22 12:18:56	-59.2461	-52.6845	14.3465	102.772	1.95656	33.9904	1.87791	12.489
2012-01-22 12:19:57	-59.2489	-52.6822	14.3432	102.69	1.89684	33.9902	1.86559	12.4812
2012-01-22 12:20:57	-59.2517	-52.68	14.3551	102.719	1.9151	33.9898	1.85219	12.4733
2012-01-22 12:21:58	-59.2546	-52.6777	14.3425	102.609	1.83558	33.9875	1.84844	12.4654
2012-01-22 12:22:58	-59.2574	-52.6755	14.3518	102.71	1.90405	33.9818	1.85565	12.4575
2012-01-22 12:23:58	-59.2603	-52.6733	14.3471	102.7	1.89514	33.9789	1.8632	12.4496
2012-01-22 12:24:59	-59.2631	-52.6709	14.3553	102.781	1.94922	33.977	1.87076	12.4418
2012-01-22 12:25:59	-59.2659	-52.6688	14.3481	102.704	1.89298	33.9738	1.86501	12.4338
2012-01-22 12:27:00	-59.2686	-52.6665	14.3545	102.736	1.91343	33.9731	1.86336	12.4259
2012-01-22 12:28:00	-59.2714	-52.6643	14.3531	102.753	1.92265	33.9711	1.86993	12.4179
2012-01-22 12:29:01	-59.2742	-52.6622	14.35	102.716	1.89482	33.9701	1.86399	12.41
2012-01-22 12:30:01	-59.277	-52.66	14.3557	102.714	1.89098	33.9675	1.85448	12.4021
2012-01-22 12:31:02	-59.2799	-52.6578	14.3435	102.553	1.77737	33.9659	1.83655	12.3942
2012-01-22 12:32:02	-59.2828	-52.6556	14.3458	102.649	1.8418	33.9649	1.85605	12.3864
2012-01-22 12:33:02	-59.2857	-52.6533	14.3373	102.532	1.75844	33.9628	1.84163	12.3785
2012-01-22 12:34:03	-59.2885	-52.651	14.3497	102.624	1.81995	33.9614	1.84079	12.3707
2012-01-22 12:35:03	-59.2914	-52.6489	14.3472	102.594	1.79689	33.9595	1.83962	12.3628
2012-01-22 12:36:04	-59.2943	-52.6466	14.3496	102.58	1.78498	33.9591	1.83316	12.3549
2012-01-22 12:37:04	-59.2973	-52.6444	14.3562	102.561	1.77047	33.9563	1.81883	12.3471
2012-01-22 12:38:05	-59.3002	-52.6422	14.3613	102.539	1.7534	33.957	1.805	12.3393
2012-01-22 12:39:05	-59.3032	-52.64	14.3625	102.552	1.75979	33.9555	1.80642	12.3315
2012-01-22 12:40:06	-59.3061	-52.6378	14.3713	102.669	1.83848	33.9554	1.81923	12.3237
2012-01-22 12:41:06	-59.309	-52.6356	14.3698	102.632	1.81075	33.9552	1.81368	12.3158
2012-01-22 12:42:06	-59.3119	-52.6335	14.3713	102.677	1.83973	33.9542	1.82304	12.308
2012-01-22 12:43:07	-59.3149	-52.6313	14.3751	102.7	1.85292	33.9524	1.82187	12.3001
2012-01-22 12:44:07	-59.3179	-52.6291	14.3796	102.755	1.88886	33.9522	1.82828	12.2923
2012-01-22 12:45:08	-59.3209	-52.6269	14.3761	102.709	1.85473	33.9514	1.82401	12.2846
2012-01-22 12:46:08	-59.3239	-52.6247	14.3683	102.699	1.84553	33.9503	1.83406	12.2768
2012-01-22 12:47:09	-59.3268	-52.6224	14.3685	102.705	1.84783	33.9505	1.83679	12.2692
2012-01-22 12:48:09	-59.3298	-52.6202	14.3728	102.683	1.83067	33.9498	1.82536	12.2615
2012-01-22 12:49:10	-59.3327	-52.6179	14.3718	102.633	1.79475	33.9496	1.81467	12.2537
2012-01-22 12:50:10	-59.3355	-52.6157	14.3671	102.699	1.83665	33.9489	1.8375	12.2459
2012-01-22 12:51:11	-59.3383	-52.6137	14.368	102.696	1.83298	33.9495	1.83643	12.238
2012-01-22 12:52:11	-59.3412	-52.6116	14.365	102.647	1.79732	33.949	1.83055	12.2302
2012-01-22 12:53:11	-59.344	-52.6095	14.3707	102.672	1.8121	33.9485	1.82683	12.2223
2012-01-22 12:54:12	-59.3468	-52.6074	14.3736	102.711	1.8362	33.9479	1.83169	12.2145
2012-01-22 12:55:12	-59.3496	-52.6054	14.3698	102.671	1.80718	33.9474	1.82931	12.2066
2012-01-22 12:56:13	-59.3525	-52.6034	14.3725	102.607	1.76199	33.9467	1.80796	12.1987
2012-01-22 12:57:13	-59.3552	-52.6013	14.3728	102.621	1.76899	33.9464	1.81011	12.1908
2012-01-22 12:58:14	-59.3581	-52.5993	14.3725	102.676	1.80399	33.9459	1.82403	12.1829
2012-01-22 12:59:14	-59.3609	-52.5973	14.3739	102.735	1.84139	33.9456	1.83612	12.1751
2012-01-22 13:00:15	-59.3638	-52.5952	14.3764	102.798	1.88151	33.9447	1.84666	12.1673
2012-01-22 13:01:15	-59.3667	-52.5931	14.3751	102.748	1.84543	33.9446	1.83451	12.1595
2012-01-22 13:02:15	-59.3696	-52.5909	14.3747	102.742	1.83898	33.9434	1.8341	12.1516
2012-01-22 13:03:16	-59.3724	-52.589	14.3761	102.798	1.87432	33.9424	1.84636	12.1437
2012-01-22 13:04:16	-59.3752	-52.5871	14.3652	102.699	1.80546	33.9413	1.84041	12.1353
2012-01-22 13:05:17	-59.3781	-52.585	14.3665	102.746	1.83235	33.9404	1.85	12.1198
2012-01-22 13:06:17	-59.3809	-52.5829	14.3682	102.759	1.83644	33.9397	1.85025	12.1042
2012-01-22 13:07:18	-59.3839	-52.5808	14.3556	102.678	1.77869	33.9384	1.85261	12.0886
2012-01-22 13:08:18	-59.3869	-52.5787	14.3593	102.734	1.81145	33.9368	1.86003	12.073
2012-01-22 13:09:19	-59.3898	-52.5765	14.3552	102.726	1.80104	33.936	1.86458	12.0573
2012-01-22 13:10:19	-59.3928	-52.5743	14.3639	102.718	1.79173	33.9361	1.84878	12.0417
2012-01-22 13:11:20	-59.3957	-52.5721	14.3596	102.604	1.71287	33.9355	1.82917	12.0261
2012-01-22 13:12:20	-59.3987	-52.5699	14.3635	102.622	1.72056	33.9361	1.82603	12.0105
2012-01-22 13:13:20	-59.4017	-52.5676	14.3624	102.565	1.67895	33.9375	1.81243	11.9949
2012-01-22 13:14:21	-59.4047	-52.5654	14.3738	102.603	1.69989	33.9365	1.80221	11.9792
2012-01-22 13:15:21	-59.4076	-52.5632	14.368	102.572	1.67563	33.9361	1.80429	11.9637
2012-01-22 13:16:22	-59.4106	-52.5609	14.3893	102.679	1.74076	33.9378	1.79211	11.9481
2012-01-22 13:17:22	-59.4136	-52.5587	14.3983	102.762	1.79033	33.9375	1.79692	11.9325
2012-01-22 13:24:25	-59.4344	-52.5425	14.3911	102.911	1.85446	33.9429	1.84842	11.824
2012-01-22 13:25:26	-59.4373	-52.5401	14.3916	102.896	1.84064	33.9424	1.84417	11.8104
2012-01-22 13:26:26	-59.4402	-52.5377	14.3891	102.918	1.85085	33.9414	1.85385	11.7969
2012-01-22 13:27:27	-59.443	-52.5354	14.3863	102.942	1.86189	33.9404	1.86394	11.7834
2012-01-22 13:28:27	-59.4459	-52.5331	14.3835	102.894	1.82755	33.9392	1.85743	11.7699
2012-01-22 13:29:28	-59.4488	-52.5308	14.3892	102.876	1.81211	33.9397	1.84312	11.7564
2012-01-22 13:30:28	-59.4517	-52.5284	14.375	102.69	1.69134	33.9395	1.82179	11.7429
2012-01-22 13:31:29	-59.4546	-52.526	14.3883	102.739	1.71897	33.9397	1.81	11.7294
2012-01-22 13:32:29	-59.4575	-52.5236	14.386	102.715	1.70019	33.9409	1.80795	11.7158
2012-01-22 13:33:30	-59.4605	-52.5212	14.3897	102.714	1.69569	33.9429	1.80167	11.7022
2012-01-22 13:34:30	-59.4635	-52.5188	14.4005	102.754	1.71692	33.947	1.79327	11.6886
2012-01-22 13:35:30	-59.4665	-52.5163	14.4116	102.84	1.76708	33.9539	1.79431	11.675
2012-01-22 13:36:31	-59.4694	-52.514	14.4285	102.994	1.85819	33.9602	1.80047	11.6615
2012-01-22 13:37:31	-59.4723	-52.5117	14.4331	103.052	1.88993	33.961	1.80521	11.6479
2012-01-22 13:38:32	-59.4752	-52.5093	14.4455	103.119	1.9272	33.9591	1.8007	11.6344
2012-01-22 13:39:32	-59.4782	-52.507	14.4439	103.061	1.88729	33.9572	1.79053	11.6208
2012-01-22 13:40:33	-59.4811	-52.5047	14.4237	102.882	1.7734	33.9549	1.78197	11.6072
2012-01-22 13:41:33	-59.484	-52.5023	14.411	102.727	1.67453	33.9529	1.7663	11.5937
2012-01-22 13:42:34	-59.487	-52.5	14.4222	102.729	1.67235	33.952	1.74804	11.5801
2012-01-22 13:43:34	-59.4899	-52.4976	14.438	102.786	1.70333	33.9548	1.73365	11.5665
2012-01-22 13:44:34	-59.4929	-52.4953	14.4529	102.862	1.74633	33.9602	1.72494	11.5529
2012-01-22 13:45:35	-59.4958	-52.4929	14.4721	103.015	1.8355	33.9686	1.72791	11.5394
2012-01-22 13:46:35	-59.4987	-52.4905	14.5089	103.316	2.01377	33.9746	1.73665	11.5258
2012-01-22 13:47:36	-59.5016	-52.4881	14.5296	103.498	2.11943	33.9776	1.74505	11.5123
2012-01-22 13:48:36	-59.5046	-52.4858	14.5447	103.735	2.25777	33.9805	1.77643	11.4987
2012-01-22 13:49:37	-59.5075	-52.4834	14.5387	103.758	2.26607	33.983	1.7921	11.4852
2012-01-22 13:50:37	-59.5104	-52.4811	14.5368	103.75	2.25638	33.9839	1.79293	11.4716
2012-01-22 13:51:38	-59.5133	-52.4788	14.5316	103.573	2.14535	33.9838	1.758	11.458
2012-01-22 13:52:38	-59.5163	-52.4764	14.5113	103.217	1.92833	33.9832	1.70732	11.4444
2012-01-22 13:53:39	-59.5192	-52.474	14.4993	102.923	1.74879	33.9802	1.65814	11.4309
2012-01-22 13:54:39	-59.5222	-52.4716	14.4958	102.794	1.66835	33.9754	1.63422	11.4173
2012-01-22 13:55:40	-59.5252	-52.4692	14.5101	102.786	1.65973	33.9708	1.60743	11.4037
2012-01-22 13:56:40	-59.5281	-52.4668	14.5234	102.753	1.63704	33.9668	1.57723	11.3901
2012-01-22 13:57:41	-59.5311	-52.4645	14.5435	102.851	1.69152	33.9634	1.56776	11.3765
2012-01-22 13:58:41	-59.534	-52.4621	14.5594	102.889	1.71073	33.9605	1.55077	11.363
2012-01-22 13:59:42	-59.5369	-52.4597	14.5799	103.021	1.78469	33.9587	1.54742	11.3495
2012-01-22 14:00:42	-59.5397	-52.4573	14.5819	102.977	1.75523	33.9565	1.53442	11.336
2012-01-22 14:01:42	-59.5426	-52.455	14.5879	102.953	1.73734	33.9559	1.51998	11.3225
2012-01-22 14:02:43	-59.5456	-52.4526	14.6006	103.01	1.7673	33.9558	1.51304	11.3089
2012-01-22 14:03:43	-59.5485	-52.4502	14.6044	102.991	1.75199	33.9552	1.50251	11.2954
2012-01-22 14:04:44	-59.5514	-52.4478	14.6105	102.968	1.73497	33.9552	1.48623	11.2818
2012-01-22 14:05:44	-59.5543	-52.4454	14.6191	103.01	1.75575	33.9546	1.48291	11.2683
2012-01-22 14:06:45	-59.5573	-52.4431	14.6218	102.915	1.69694	33.9541	1.45566	11.2547
2012-01-22 14:53:05	-59.6929	-52.3301	14.8805	104.633	2.40299	34.0769	1.42667	10.5839
2012-01-22 14:54:06	-59.6959	-52.3277	14.8834	104.741	2.45163	34.0773	1.44804	10.5683
2012-01-22 14:55:06	-59.6988	-52.3253	14.8939	104.694	2.42115	34.0748	1.41951	10.5528
2012-01-22 14:56:07	-59.7018	-52.3228	14.9067	104.655	2.39521	34.0686	1.39029	10.5372
2012-01-22 14:57:07	-59.7047	-52.3204	14.9223	104.831	2.47875	34.064	1.40698	10.5216
2012-01-22 14:58:07	-59.7077	-52.318	14.9202	104.881	2.49671	34.0616	1.42293	10.5059
2012-01-22 14:59:08	-59.7107	-52.3155	14.9287	105.015	2.5582	34.0562	1.44067	10.4903
2012-01-22 15:00:08	-59.7136	-52.3131	14.9285	105.111	2.59917	34.0537	1.46488	10.4747
2012-01-22 15:01:09	-59.7166	-52.3107	14.9128	104.984	2.52814	34.0494	1.46235	10.4591
2012-01-22 15:02:09	-59.7195	-52.3083	14.8999	104.863	2.45968	34.0471	1.45602	10.4436
2012-01-22 15:03:10	-59.7225	-52.3059	14.8972	104.916	2.47942	34.0465	1.47402	10.428
2012-01-22 15:04:10	-59.7254	-52.3034	14.8971	104.902	2.4657	34.046	1.47052	10.4124
2012-01-22 15:05:11	-59.7284	-52.3008	14.8856	104.752	2.38397	34.0448	1.45442	10.397
2012-01-22 15:06:11	-59.7313	-52.2984	14.8837	104.696	2.34937	34.045	1.4445	10.3814
2012-01-22 15:07:11	-59.7342	-52.2959	14.8811	104.732	2.36031	34.0434	1.45819	10.3659
2012-01-22 15:08:12	-59.7372	-52.2934	14.8856	104.739	2.3576	34.0437	1.45253	10.3503
2012-01-22 15:09:12	-59.7402	-52.2909	14.8835	104.742	2.35209	34.0422	1.45583	10.3347
2012-01-22 15:10:13	-59.7432	-52.2885	14.8845	104.685	2.31731	34.0412	1.44097	10.319
2012-01-22 15:11:13	-59.7462	-52.286	14.8843	104.647	2.29229	34.0425	1.43156	10.3033
2012-01-22 15:12:14	-59.7492	-52.2835	14.8986	104.709	2.31642	34.0428	1.42288	10.2878
2012-01-22 15:13:14	-59.7522	-52.2811	14.8914	104.561	2.23768	34.0442	1.39899	10.2721
2012-01-22 15:14:14	-59.7552	-52.2786	14.9093	104.603	2.25229	34.0473	1.37917	10.2564
2012-01-22 15:15:15	-59.7581	-52.2761	14.93	104.708	2.29709	34.0489	1.36984	10.241
2012-01-22 15:16:15	-59.7611	-52.2736	14.9482	104.732	2.30275	34.0506	1.34493	10.2254
2012-01-22 15:17:16	-59.7641	-52.2711	14.9769	104.904	2.37988	34.0542	1.33831	10.21
2012-01-22 15:18:16	-59.767	-52.2686	14.9943	105.124	2.47912	34.0597	1.36066	10.1946
2012-01-22 15:19:17	-59.7701	-52.2661	15.0162	105.345	2.57823	34.0631	1.37621	10.1792
2012-01-22 15:20:17	-59.7731	-52.2636	15.0296	105.557	2.67241	34.063	1.40515	10.1637
2012-01-22 15:21:18	-59.7762	-52.2612	15.0397	105.686	2.72684	34.0556	1.42026	10.1481
2012-01-22 15:22:18	-59.7792	-52.2588	15.0114	105.538	2.64806	34.0442	1.43435	10.1326
2012-01-22 15:23:18	-59.7823	-52.2564	14.9644	105.301	2.52718	34.035	1.45902	10.1171
2012-01-22 15:24:19	-59.7853	-52.2539	14.9129	105.078	2.41362	34.0248	1.49362	10.1016
2012-01-22 15:25:19	-59.7884	-52.2514	14.8705	105.121	2.42562	34.0168	1.57654	10.086
2012-01-22 15:26:20	-59.7914	-52.2489	14.8169	105.21	2.45895	34.0116	1.68878	10.0705
2012-01-22 15:27:20	-59.7945	-52.2465	14.7747	105.189	2.441	34.0072	1.75614	10.055
2012-01-22 15:28:21	-59.7975	-52.2441	14.7239	105.026	2.35668	34.0051	1.80354	10.0394
2012-01-22 15:29:21	-59.8006	-52.2418	14.6535	104.603	2.15148	34.0019	1.82236	10.0238
2012-01-22 15:30:22	-59.8037	-52.2394	14.5802	104.077	1.90026	33.9923	1.82368	10.0082
2012-01-22 15:31:22	-59.8068	-52.237	14.5156	103.557	1.65365	33.9848	1.81198	9.99256
2012-01-22 15:32:23	-59.8098	-52.2347	14.4695	103.23	1.49716	33.9799	1.81282	9.97692
2012-01-22 15:33:23	-59.8129	-52.2323	14.4442	103.038	1.40394	33.9773	1.81002	9.96131
2012-01-22 15:34:24	-59.816	-52.2299	14.4298	102.945	1.35711	33.976	1.81413	9.94574
2012-01-22 15:35:24	-59.819	-52.2276	14.4323	103.009	1.38259	33.9753	1.82612	9.93012
2012-01-22 15:36:25	-59.8221	-52.2252	14.4186	102.859	1.30984	33.9746	1.81466	9.91445
2012-01-22 15:37:25	-59.8253	-52.2229	14.4122	102.781	1.27058	33.974	1.80706	9.89874
2012-01-22 15:38:26	-59.8284	-52.2205	14.411	102.804	1.27698	33.9743	1.81453	9.8831
2012-01-22 15:39:26	-59.8314	-52.2181	14.4036	102.706	1.22907	33.9741	1.8042	9.86754
2012-01-22 15:40:27	-59.8345	-52.2158	14.3999	102.626	1.18898	33.9732	1.79121	9.85193
2012-01-22 15:41:27	-59.8375	-52.2134	14.3978	102.624	1.18455	33.9735	1.79437	9.83635
2012-01-22 15:42:28	-59.8406	-52.211	14.3974	102.64	1.1885	33.9734	1.79986	9.82077
2012-01-22 15:43:28	-59.8437	-52.2085	14.401	102.642	1.1858	33.9735	1.79409	9.80519
2012-01-22 15:44:29	-59.8468	-52.2061	14.3967	102.57	1.15032	33.9738	1.78378	9.78957
2012-01-22 15:45:29	-59.8499	-52.2037	14.4064	102.659	1.18659	33.9758	1.78788	9.77395
2012-01-22 15:46:30	-59.8529	-52.2013	14.4	102.626	1.16798	33.9778	1.79039	9.75837
2012-01-22 15:47:30	-59.856	-52.1989	14.4061	102.64	1.17077	33.9786	1.78324	9.74284
2012-01-22 15:48:31	-59.859	-52.1964	14.4074	102.624	1.16048	33.981	1.77743	9.72734
2012-01-22 15:49:31	-59.862	-52.1939	14.4096	102.617	1.15385	33.9828	1.77232	9.71188
2012-01-22 15:50:32	-59.8651	-52.1915	14.4073	102.59	1.13886	33.9838	1.76961	9.6964
2012-01-22 15:51:32	-59.8681	-52.189	14.4088	102.607	1.14275	33.9851	1.7709	9.68092
2012-01-22 15:52:32	-59.8711	-52.1866	14.407	102.576	1.12568	33.985	1.76663	9.66546
2012-01-22 15:53:33	-59.8741	-52.1842	14.4051	102.573	1.12098	33.9849	1.76899	9.64997
2012-01-22 15:54:33	-59.8772	-52.1817	14.42	102.701	1.17355	33.9856	1.77417	9.63532
2012-01-22 15:55:34	-59.8802	-52.1793	14.4159	102.64	1.14403	33.9859	1.76608	9.62103
2012-01-22 15:56:34	-59.8828	-52.1761	14.418	102.659	1.14927	33.9861	1.76771	9.60765
2012-01-22 15:57:35	-59.885	-52.172	14.4126	102.606	1.12384	33.9878	1.76505	9.59528
2012-01-22 15:58:35	-59.8871	-52.1673	14.4178	102.618	1.12631	33.9889	1.75867	9.58349
2012-01-22 15:59:35	-59.8891	-52.1622	14.4352	102.763	1.18603	33.9895	1.76382	9.57193
2012-01-22 16:00:36	-59.8912	-52.157	14.4433	102.936	1.25698	33.9901	1.79232	9.56036
2012-01-22 16:01:36	-59.8932	-52.1517	14.4417	103.13	1.33656	33.9898	1.84274	9.54884
2012-01-22 16:02:37	-59.8952	-52.1465	14.4429	103.326	1.4169	33.9891	1.88964	9.53739
2012-01-22 16:03:37	-59.8973	-52.1413	14.4443	103.464	1.47187	33.9897	1.91972	9.52589
2012-01-22 16:04:38	-59.8993	-52.136	14.4104	103.218	1.36457	33.9897	1.91929	9.51436
2012-01-22 16:05:38	-59.9014	-52.1308	14.3779	102.965	1.25424	33.9879	1.91471	9.50287
2012-01-22 16:06:39	-59.9034	-52.1255	14.3544	102.746	1.15922	33.9862	1.90351	9.49134
2012-01-22 16:07:39	-59.9055	-52.1202	14.3347	102.599	1.09492	33.9833	1.90359	9.48015
2012-01-22 16:08:40	-59.9075	-52.1148	14.3295	102.581	1.08484	33.9814	1.90779	9.46903
2012-01-22 16:09:40	-59.9097	-52.1094	14.3183	102.476	1.03827	33.9782	1.90155	9.45782
2012-01-22 16:10:41	-59.9118	-52.104	NaN	NaN	NaN	33.9754	1.90519	9.44663
2012-01-22 16:11:41	-59.9139	-52.0987	NaN	NaN	NaN	33.9743	1.90544	9.43546
2012-01-22 16:12:42	-59.916	-52.0933	14.3095	102.421	1.00881	33.9739	1.90592	9.42427
2012-01-22 16:13:42	-59.9181	-52.088	14.3029	102.433	1.01135	33.9731	1.92083	9.41308
2012-01-22 16:14:42	-59.9202	-52.0827	14.3032	102.489	1.03246	33.9728	1.93442	9.40185
2012-01-22 16:15:43	-59.9223	-52.0775	14.2947	102.446	1.01211	33.9726	1.93871	9.39052
2012-01-22 16:16:43	-59.9244	-52.0721	14.2877	102.402	0.991561	33.9735	1.93978	9.37803
2012-01-22 16:17:44	-59.9265	-52.0668	14.2806	102.433	1.0018	33.9748	1.95909	9.3656
2012-01-22 16:18:44	-59.9285	-52.0617	14.2785	102.45	1.00592	33.9752	1.9677	9.35317
2012-01-22 16:19:45	-59.9306	-52.0565	14.2773	102.443	1.0009	33.9773	1.96833	9.34073
2012-01-22 16:20:45	-59.9326	-52.0515	14.2718	102.407	0.983657	33.9777	1.96897	9.32827
2012-01-22 16:21:46	-59.9347	-52.0468	14.2632	102.355	0.959814	33.9758	1.97173	9.31569
2012-01-22 16:22:46	-59.9373	-52.045	14.2606	102.364	0.960865	33.9741	1.97768	9.30204
2012-01-22 16:23:47	-59.9402	-52.0456	14.2456	102.297	0.930936	33.9707	1.98767	9.28766
2012-01-22 16:24:47	-59.9432	-52.0464	14.2362	102.129	0.860399	33.9699	1.96422	9.27305
2012-01-22 16:25:48	-59.9464	-52.0473	14.2374	102.077	0.837113	33.9696	1.94948	9.25834
2012-01-22 16:26:48	-59.9495	-52.0481	14.2401	102.156	0.866295	33.9678	1.96371	9.24363
2012-01-22 16:27:49	-59.9526	-52.0489	14.2494	102.147	0.859871	33.9669	1.94431	9.22835
2012-01-22 16:28:49	-59.9558	-52.0497	14.2436	102.075	0.828524	33.9666	1.9371	9.2121
2012-01-22 16:29:49	-59.959	-52.0505	14.255	102.118	0.842813	33.966	1.92695	9.19576
2012-01-22 16:30:50	-59.9623	-52.0512	14.25	101.987	0.788344	33.967	1.90327	9.17949
2012-01-22 16:31:51	-59.9654	-52.0521	14.2608	102.118	0.837287	33.9653	1.91688	9.16317
2012-01-22 16:32:51	-59.9686	-52.0529	14.2744	102.157	0.850148	33.9646	1.90355	9.14689
2012-01-22 16:33:51	-59.9718	-52.0538	14.2688	102.15	0.844711	33.9627	1.91165	9.13054
2012-01-22 16:34:52	-59.975	-52.0546	14.2739	102.126	0.832347	33.9629	1.89661	9.11419
2012-01-22 16:35:52	-59.9783	-52.0554	14.2875	102.234	0.871696	33.9627	1.89857	9.09784
2012-01-22 16:36:53	-59.9815	-52.0562	14.292	102.172	0.845041	33.9633	1.87549	9.08148
2012-01-22 16:37:53	-59.9846	-52.0568	14.2973	102.204	0.854626	33.9636	1.87399	9.0654
2012-01-22 16:38:54	-59.9878	-52.0576	14.3007	102.183	0.843462	33.9639	1.86289	9.04919
2012-01-22 16:39:54	-59.991	-52.0584	14.3117	102.168	0.835161	33.9668	1.83969	9.03282
2012-01-22 16:40:55	-59.9943	-52.0591	14.3205	102.103	0.807651	33.9709	1.80692	9.01643
2012-01-22 16:41:55	-59.9976	-52.0599	14.3431	102.19	0.838313	33.9785	1.78797	9.00003
2012-01-22 16:42:55	-60.0008	-52.0607	14.3694	102.32	0.884826	33.9847	1.77191	8.98366
2012-01-22 16:43:56	-60.0041	-52.0614	14.3839	102.277	0.865991	33.9834	1.73721	8.96741
2012-01-22 16:44:56	-60.0072	-52.0621	14.3987	102.459	0.9318	33.9803	1.75706	8.95121
2012-01-22 16:45:57	-60.0105	-52.0628	14.4133	102.511	0.948265	33.9791	1.74404	8.9349
2012-01-22 16:46:57	-60.0138	-52.0634	14.4364	102.635	0.99204	33.9779	1.73614	8.9186
2012-01-22 16:47:58	-60.0171	-52.0641	14.4471	102.842	1.06609	33.9762	1.76726	8.90227
2012-01-22 16:48:58	-60.0203	-52.0646	14.4533	102.841	1.062	33.9765	1.75614	8.88599
2012-01-22 16:49:59	-60.0236	-52.0651	14.4659	102.912	1.0851	33.9767	1.75091	8.86982
2012-01-22 16:50:59	-60.0268	-52.0656	14.4711	102.877	1.06853	33.9758	1.73347	8.85361
2012-01-22 16:51:59	-60.03	-52.0661	14.4747	102.799	1.03636	33.977	1.71002	8.83748
2012-01-22 16:53:00	-60.0333	-52.0666	14.4848	102.856	1.05364	33.9771	1.70509	8.82132
2012-01-22 16:54:00	-60.0365	-52.0672	14.4866	102.919	1.07342	33.9782	1.71816	8.8051
2012-01-22 16:55:01	-60.0397	-52.0677	14.4949	102.931	1.0739	33.9799	1.70564	8.78902
2012-01-22 16:56:01	-60.0429	-52.0683	14.5141	103.026	1.10534	33.979	1.69655	8.77284
2012-01-22 16:57:02	-60.0461	-52.0688	14.5229	103.071	1.11774	33.9772	1.69177	8.75664
2012-01-22 16:58:02	-60.0494	-52.0693	14.5177	102.949	1.07005	33.9779	1.67095	8.74045
2012-01-22 16:59:03	-60.0526	-52.0698	14.5407	103.053	1.10379	33.9779	1.65621	8.72425
2012-01-22 17:00:03	-60.0559	-52.0703	14.5582	103.29	1.18521	33.98	1.68221	8.70805
2012-01-22 17:01:03	-60.0591	-52.0708	14.5735	103.61	1.2957	33.9838	1.73431	8.69189
2012-01-22 17:02:04	-60.0624	-52.0712	14.5819	103.79	1.35533	33.9892	1.76216	8.67571
2012-01-22 17:03:04	-60.0657	-52.0716	14.5911	103.923	1.39765	33.993	1.77763	8.65948
2012-01-22 17:04:05	-60.069	-52.072	14.575	103.715	1.31919	33.9992	1.75357	8.64323
2012-01-22 17:05:05	-60.0723	-52.0724	14.5479	103.202	1.13348	34.0051	1.67441	8.62708
2012-01-22 17:06:06	-60.0756	-52.0727	14.5469	102.685	0.948208	34.0146	1.54984	8.61089
2012-01-22 17:07:06	-60.0789	-52.0731	14.5735	102.575	0.906476	34.0267	1.4759	8.59473
2012-01-22 17:08:07	-60.0822	-52.0734	14.6292	102.714	0.952653	34.0344	1.4133	8.57859
2012-01-22 17:09:07	-60.0855	-52.0737	14.7224	103.032	1.06108	34.0375	1.33184	8.56249
2012-01-22 17:10:07	-60.0888	-52.074	14.8445	103.5	1.22145	34.0414	1.23918	8.54633
2012-01-22 17:11:08	-60.0921	-52.0742	14.9535	104.109	1.42883	34.0474	1.20211	8.5288
2012-01-22 17:12:08	-60.0954	-52.0746	15.0796	105.022	1.73843	34.0628	1.20766	8.50916
2012-01-22 17:13:09	-60.0986	-52.0752	NaN	NaN	NaN	34.0736	1.20076	8.48966
2012-01-22 17:14:09	-60.1018	-52.0757	NaN	NaN	NaN	34.1039	1.23301	8.47024
2012-01-22 17:15:10	-60.1049	-52.0762	15.3976	107.35	2.51036	34.1591	1.21771	8.45077
2012-01-22 17:16:10	-60.1081	-52.0767	NaN	NaN	NaN	34.1723	1.2307	8.43132
2012-01-22 17:17:11	-60.1113	-52.0772	NaN	NaN	NaN	34.1782	1.20758	8.41188
2012-01-22 17:18:11	-60.1145	-52.0777	15.5089	108.016	2.70344	34.1793	1.18963	8.39246
2012-01-22 17:19:12	-60.1177	-52.0782	15.5328	108.079	2.71357	34.174	1.16698	8.37313
2012-01-22 17:20:12	-60.1208	-52.0786	15.5562	108.102	2.71045	34.1683	1.13485	8.35387
2012-01-22 17:21:13	-60.1239	-52.079	15.5821	108.227	2.74069	34.1619	1.12257	8.33457
2012-01-22 17:22:13	-60.1271	-52.0794	15.6062	108.388	2.78496	34.1524	1.12264	8.31901
2012-01-22 17:23:13	-60.1303	-52.0797	15.6359	108.532	2.82464	34.1485	1.10875	8.30543
2012-01-22 17:24:14	-60.1335	-52.08	15.6486	108.601	2.83884	34.1475	1.10336	8.29186
2012-01-22 17:25:14	-60.1367	-52.0802	15.6668	108.813	2.89945	34.1482	1.12222	8.27833
2012-01-22 17:26:15	-60.1399	-52.0805	15.6744	108.984	2.94651	34.1493	1.15063	8.26473
2012-01-22 17:27:15	-60.1431	-52.0808	15.6718	109.211	3.01051	34.1496	1.20669	8.25112
2012-01-22 17:28:16	-60.1463	-52.0811	15.6766	109.531	3.10383	34.1535	1.27112	8.23747
2012-01-22 17:29:16	-60.1496	-52.0815	15.6539	109.393	3.05028	34.1641	1.27394	8.22499
2012-01-22 17:30:17	-60.1528	-52.0819	15.6211	109.138	2.95929	34.1793	1.26599	8.21275
2012-01-22 17:31:17	-60.1561	-52.0822	15.5733	108.716	2.81498	34.1864	1.24531	8.20051
2012-01-22 17:32:18	-60.1593	-52.0825	15.5302	108.368	2.69559	34.1889	1.23474	8.18829
2012-01-22 17:33:18	-60.1625	-52.0827	15.5271	108.272	2.65771	34.1898	1.21839	8.17609
2012-01-22 17:34:18	-60.1658	-52.083	15.526	108.221	2.63427	34.1898	1.20838	8.16387
2012-01-22 17:35:19	-60.169	-52.0833	15.5518	108.355	2.66926	34.1916	1.19803	8.15032
2012-01-22 17:36:19	-60.1722	-52.0836	15.5877	108.488	2.7035	34.1947	1.17057	8.13608
2012-01-22 17:37:20	-60.1755	-52.0839	15.611	108.492	2.69644	34.1985	1.13343	8.12183
2012-01-22 17:38:21	-60.1787	-52.0842	15.6564	108.445	2.67453	34.2043	1.04961	8.10756
2012-01-22 17:39:21	-60.1819	-52.0847	15.7165	108.387	2.64925	34.2174	0.93832	8.09322
2012-01-22 17:40:21	-60.1848	-52.0845	NaN	NaN	NaN	34.2401	0.898402	8.07961
2012-01-22 17:41:22	-60.1869	-52.0819	NaN	NaN	NaN	34.2544	0.885785	8.0685
2012-01-22 17:42:22	-60.1884	-52.0772	16.0348	110.276	3.22245	34.2573	0.868178	8.05916
2012-01-22 17:43:23	-60.1904	-52.0724	16.1616	111.113	3.47756	34.2599	0.860233	8.0496
2012-01-22 17:44:23	-60.1924	-52.0672	16.2475	111.662	3.64174	34.262	0.851046	8.04016
2012-01-22 17:45:24	-60.1945	-52.0618	16.3219	112.164	3.79014	34.265	0.847899	8.03079
2012-01-22 17:46:24	-60.1967	-52.0563	16.3817	112.611	3.92076	34.2675	0.855489	8.02141
2012-01-22 17:47:25	-60.1991	-52.0522	16.4298	112.922	4.0077	34.2703	0.850434	8.0109
2012-01-22 17:48:25	-60.202	-52.0511	16.4742	113.161	4.0697	34.2739	0.83342	7.99795
2012-01-22 17:49:26	-60.2049	-52.0516	16.5185	113.367	4.1205	34.2774	0.811145	7.98381
2012-01-22 17:50:26	-60.208	-52.0523	16.5559	113.531	4.1579	34.2803	0.790457	7.96955
2012-01-22 17:51:27	-60.2111	-52.053	16.5746	113.614	4.16992	34.2813	0.780892	7.95517
2012-01-22 17:52:27	-60.2142	-52.0536	16.5992	113.863	4.23148	34.2831	0.798421	7.94074
2012-01-22 17:53:28	-60.2174	-52.0543	16.6321	114.151	4.30463	34.2861	0.811827	7.9263
2012-01-22 17:54:28	-60.2206	-52.055	16.6668	114.316	4.34058	34.2876	0.796096	7.91187
2012-01-22 17:55:28	-60.2238	-52.0556	16.7035	114.45	4.36737	34.2897	0.771206	7.89742
2012-01-22 17:56:29	-60.227	-52.0563	16.7063	114.4	4.33826	34.2932	0.755914	7.88301
2012-01-22 17:57:29	-60.2301	-52.0569	16.722	114.502	4.35436	34.2951	0.754156	7.86862
2012-01-22 17:58:30	-60.2333	-52.0575	16.735	114.6	4.36879	34.2957	0.755823	7.85425
2012-01-22 17:59:30	-60.2365	-52.058	16.7465	114.689	4.38067	34.2966	0.75757	7.83991
2012-01-22 18:00:31	-60.2396	-52.0586	16.7794	114.913	4.43476	34.2992	0.756955	7.82777
2012-01-22 18:01:31	-60.2428	-52.0591	16.8102	115.092	4.47752	34.3028	0.74931	7.81769
2012-01-22 18:02:32	-60.246	-52.0596	16.8144	115.116	4.4739	34.3056	0.748139	7.80759
[truncated: 7,731 more rows]
