# Supplementary material for: Nitrous oxide variability at sub-kilometre resolution in the Atlantic sector of the Southern Ocean
Source: PeerJ journal article supplement (doi:10.7717/peerj.5100), 2018-07-06

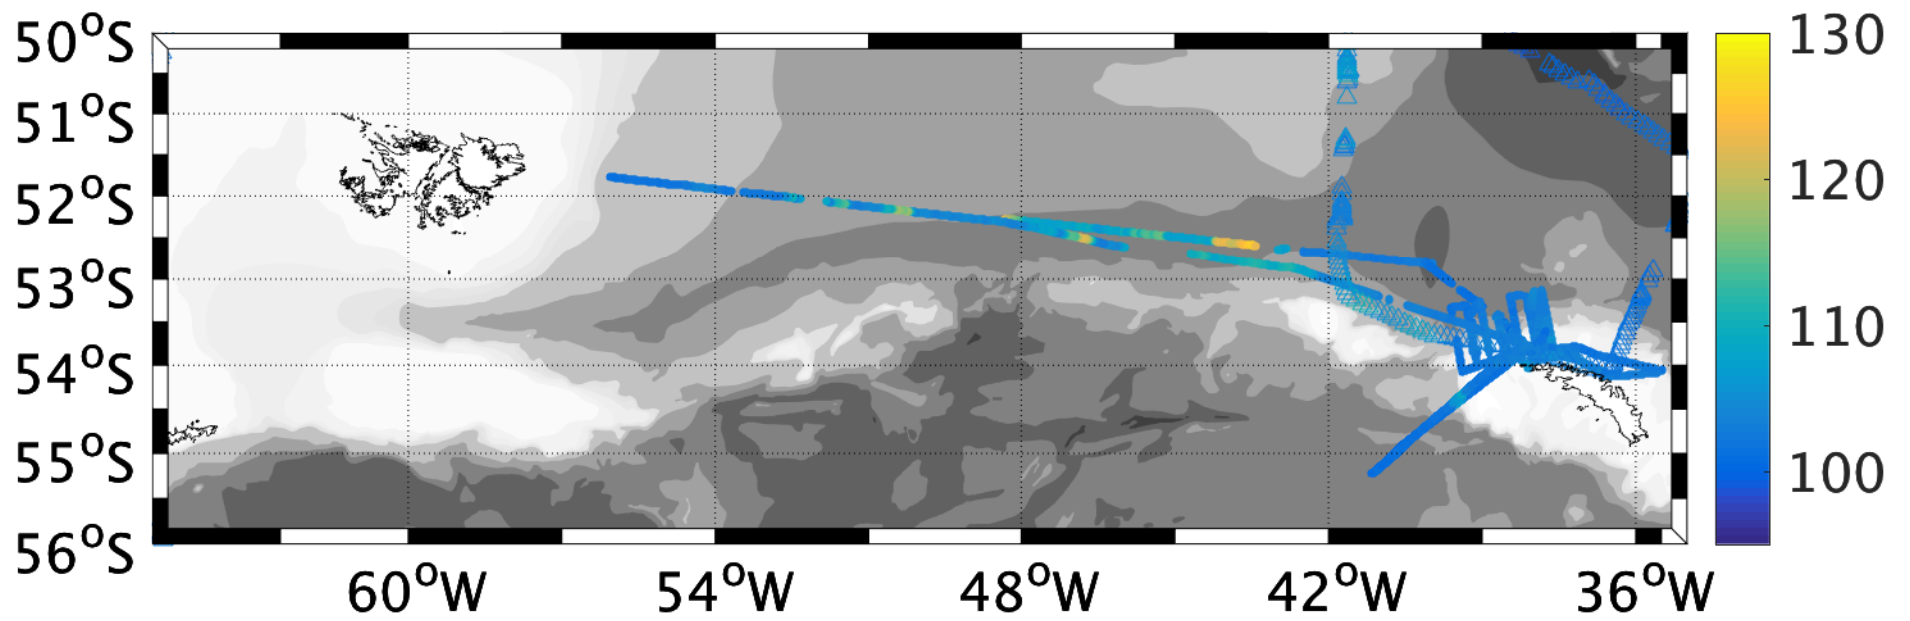

Supplement: Weiss_JR260B.pdf [file Weiss_JR260B.pdf]
